# Supplementary material for: Merging radical-polar crossover/cycloisomerization processes: access to polyfunctional furans enabled by metallaphotoredox catalysis
Source: Royal Society of Chemistry journal article supplement (doi:10.1039/d0qo01472a), 2021-01-01

# Supporting Information for

**Merging radical-polar crossover/cycloisomerization processes:  
access to polyfunctional furans enabled by metallaphotoredox  
catalysis**

Yongjun Liu, Wenping Luo, Tingting Xia, Yewen Fang,\* Chan Du, Xiaoping Jin,\* Yan  
Li,\* Li Zhang, Wan Lei and Hao Wu

---

## Table of Contents

|                                                                                                                    |     |
|--------------------------------------------------------------------------------------------------------------------|-----|
| 1 General information .....                                                                                        | S1  |
| 1.1 Solvents, reagents, and starting materials.....                                                                | S1  |
| 1.2 Instruments.....                                                                                               | S1  |
| 1.3 Picture of a typical reaction setup .....                                                                      | S2  |
| 2 Synthesis of various 2-(1-alkynyl)-2-alken-1-ones .....                                                          | S2  |
| 2.1 General procedure for the preparation of various 2-(1-alkynyl)-2-alken-1-ones 1a-v ..                          | S2  |
| 2.2 General procedure for the preparation of various 2-(1-alkynyl)-2-alken-1-ones 1w-x.                            | S3  |
| 3 Further screening of transition metal catalyst.....                                                              | S9  |
| 4 General procedures of dual photoredox/copper-catalyzed reactions .....                                           | S10 |
| 4.1 General procedure for the preparation of polyfunctional furans 3, 5a, 6a, 6e, 10a-o,<br>11a-c, and 11f-i. .... | S10 |
| 4.2 General procedure for the preparation of polyfunctional furans 5c, 5e, 5g , 6c, 6f, 6h,<br>and 11e. ....       | S11 |
| 4.3 General procedure for the preparation of polyfunctional furans 5b, 5d, 5f, 6b, 6d, and<br>6g. ....             | S11 |
| 4.4 General procedure for the preparation of polyfunctional furans 9a-j.....                                       | S12 |
| 5 Mechanistic experiments.....                                                                                     | S29 |
| 5.1 Cyclopropanation vs cycloisomerization.....                                                                    | S29 |
| 5.2 Deuteration study .....                                                                                        | S30 |
| 6 Dehydrogenation of furan product.....                                                                            | S32 |
| 7 Reference.....                                                                                                   | S33 |
| 8 NMR spectra of new compounds.....                                                                                | S34 |

---

# 1 General information

## 1.1 Solvents, reagents, and starting materials

All reactions were carried out under an atmosphere of nitrogen in oven-dried glassware. Photocatalysts Ir[dF(CF<sub>3</sub>)ppy]<sub>2</sub>(dtbbpy)PF<sub>6</sub>,<sup>1a</sup> 4CzIPN,<sup>1b</sup> and Ru(bpz)<sub>3</sub>(PF<sub>6</sub>)<sub>2</sub><sup>1c</sup> were prepared according to published procedures. Alkyl bis(catecholato)silicates **2** were reported in our previous literatures.<sup>2</sup> 4-Alkyldihydropyridines **7**,<sup>3a</sup> 4-benzoyl-1,4-dihydropyridine,<sup>3b</sup> 4-carbamoyl-1,4-dihydropyridine,<sup>3c</sup> and Hantzsch nitrile **8**<sup>3a</sup> were prepared using available protocols. Dried solvents were obtained from commercial sources and used without further purification unless otherwise noted.

## 1.2 Instruments

Hydrogen-1 and carbon-13 nuclear magnetic resonance spectra were recorded on Bruker Avance 500 spectrometer (500 MHz), Agilent 400MHz NMR Spectrometer, Bruker Ultrashield 400 PLUS, Varian AS400 (400MHz). Fluorine-19 nuclear magnetic resonance spectra were recorded on an Agilent 400MHz NMR Spectrometer. Deuterium-2 nuclear magnetic resonance spectra were recorded on Bruker Ultrashield 400 PLUS, Varian AS400 (400MHz). Chemical shifts were reported in ppm downfield from tetramethylsilane, and calibrated using residue undeuterated solvent (CDCl<sub>3</sub> at 7.26 ppm <sup>1</sup>H NMR, 77.0 ppm <sup>13</sup>C NMR). Spectra were reported as follows: chemical shift (δ ppm), multiplicity (s = singlet, d = doublet, t = triplet, q =quartet, m = multiplet, br = broad), coupling constants (Hz) and integration. High resolution mass spectra (HRMS) were recorded on Agilent 6210 ESI/TOF MS, Thermo Q Exactive Plus, and Waters G2-Xs QTOF mass spectrometers. Analytical thin layer chromatography was performed on Polygram SIL G/UV<sub>254</sub> plates. Visualization was accomplished with short wave UV light, or KMnO<sub>4</sub> staining solutions. Flash column chromatography was performed using silica gel (300-400 mesh) with solvents to use.

### 1.3 Picture of a typical reaction setup

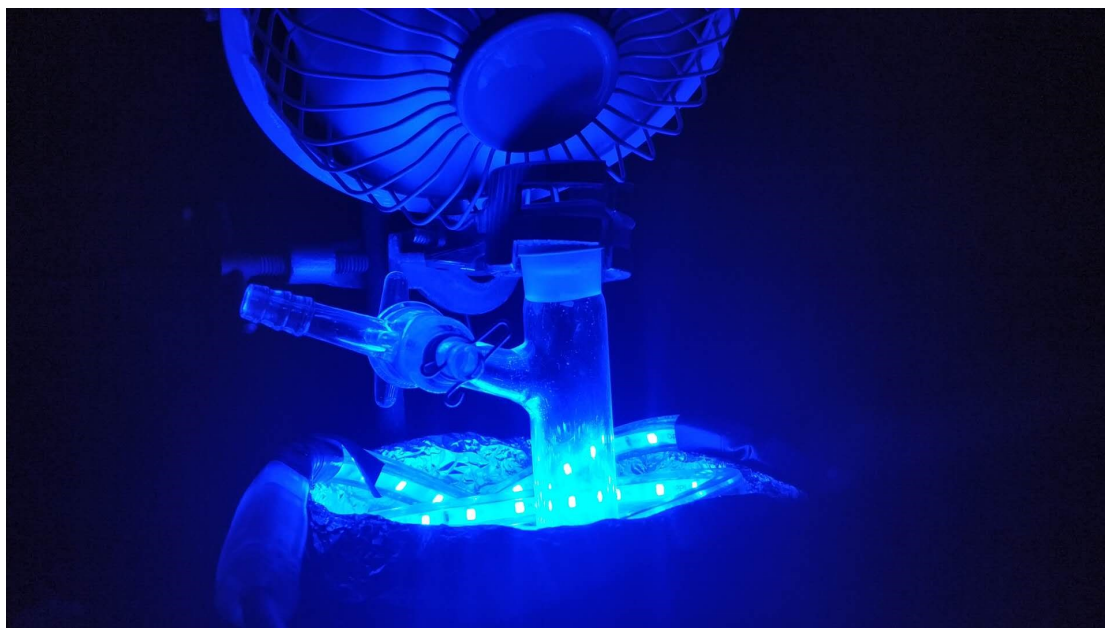

## 2 Synthesis of various 2-(1-alkynyl)-2-alken-1-ones

### 2.1 General procedure for the preparation of various 2-(1-alkynyl)-2-alken-1-ones 1a-v

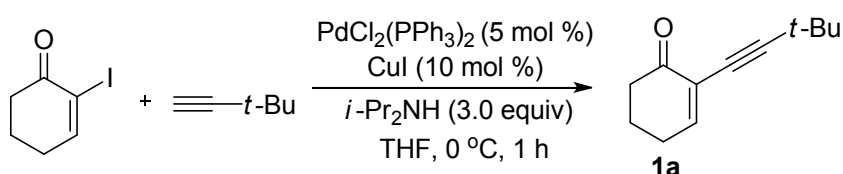

A solution of 2-iodo-cyclohexenone<sup>4</sup> (1.11 g, 5.00 mmol, 1.0 equiv) in THF (25 mL) was treated with PdCl<sub>2</sub>(PPh<sub>3</sub>)<sub>2</sub> (176 mg, 0.25 mmol, 5 mol %) and CuI (95.2 mg, 0.5 mmol, 10 mol %) and cooled down to 0 °C under a N<sub>2</sub> atmosphere and in the dark. After 10 min of stirring, 3,3-dimethylbut-1-yne (822.0 mg, 10.0 mmol, 2.0 equiv) and diisopropylamine (1.52 g, 15.0 mmol, 3.0 equiv) were added, and the resulting yellow to dark brown solution was stirred at 0 °C for 1 h. The reaction mixture was partitioned between ethyl acetate and 0.5 N aqueous HCl solution. The aqueous layer was extracted three times with ethyl acetate and the combined organic phases were washed with brine, dried over MgSO<sub>4</sub>, filtered and concentrated under vacuum. The

crude product was purified by flash column chromatography to yield alkyne **1a** as a yellow solid.

## 2.2 General procedure for the preparation of various 2-(1-alkynyl)-2-alken-1-ones **1w-x**.

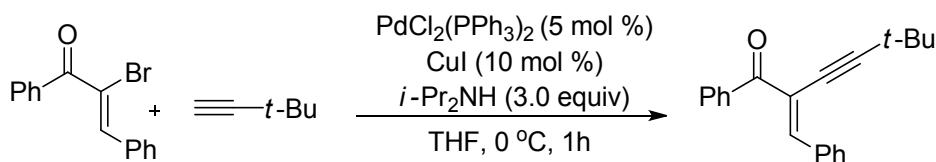

A solution of 2-bromo-1,3-diphenylprop-2-en-1-one<sup>5</sup> (1.44 g, 5.00 mmol, 1.0 equiv) in THF (25 mL) was treated with  $\text{PdCl}_2(\text{PPh}_3)_2$  (176 mg, 0.25 mmol, 5 mol %) and  $\text{CuI}$  (95.2 mg, 0.5 mmol, 10 mol %) and cooled down to  $0^\circ\text{C}$  under a  $\text{N}_2$  atmosphere and in the dark. After 10 min of stirring, 3,3-dimethylbut-1-yne (822.0 mg, 10.0 mmol, 2.0 equiv) and diisopropylamine (1.52 g, 15.0 mmol, 3.0 equiv) were added, and the resulting dark brown solution was stirred at  $0^\circ\text{C}$  for 1 h. The reaction mixture was partitioned between ethyl acetate and 0.5 N aqueous HCl solution. The aqueous layer was extracted three times with ethyl acetate and the combined organic phases were washed with brine, dried over  $\text{MgSO}_4$ , filtered and concentrated under vacuum. The crude product was purified by flash column chromatography to yield alkyne **1w** as a yellow liquid.

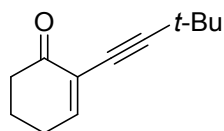

**2-(3,3-dimethylbut-1-yn-1-yl)cyclohex-2-en-1-one (1a).**<sup>6</sup>  $^1\text{H}$  NMR (500 MHz,  $\text{CDCl}_3$ )  $\delta$  7.17 (t,  $J = 4.5$  Hz, 1H), 2.48-2.43 (m, 2H), 2.43-2.37 (m, 2H), 2.02-1.96 (m, 2H), 1.27 (s, 9H).  $^{13}\text{C}$  NMR (125 MHz,  $\text{CDCl}_3$ )  $\delta$  195.9, 152.8, 125.5, 101.4, 73.4, 38.2, 30.9, 27.9, 26.3, 22.5.

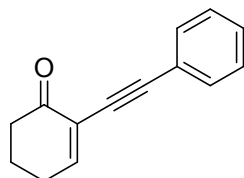

**2-(phenylethynyl)cyclohex-2-en-1-one (1b).**<sup>7</sup>  $^1\text{H}$  NMR (500 MHz,  $\text{CDCl}_3$ )  $\delta$  7.52-7.47 (m, 2H), 7.36 (t,  $J = 4.5$  Hz, 1H), 7.34-7.28 (m, 3H), 2.56-2.47 (m, 4H), 2.09-2.04 (m, 2H).  $^{13}\text{C}$  NMR (125 MHz,  $\text{CDCl}_3$ )  $\delta$  195.5, 154.1, 131.8, 128.4, 128.2, 125.3, 122.9, 92.1, 83.8, 38.2, 26.5, 22.4.

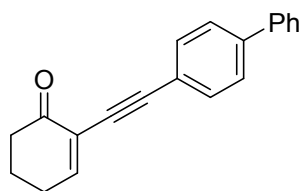

**2-((1,1'-biphenyl)-4-ylethynyl)cyclohex-2-en-1-one (1c).**<sup>8</sup> <sup>1</sup>H NMR (500 MHz, CDCl<sub>3</sub>) δ 7.64-7.57 (m, 6H), 7.48-7.44 (m, 2H), 7.42-7.36 (m, 2H), 2.59-2.53 (m, 4H), 2.13-2.07 (m, 2H). <sup>13</sup>C NMR (100 MHz, CDCl<sub>3</sub>) δ 195.3, 154.1, 141.0, 140.2, 132.1, 128.8, 127.6, 126.9, 126.8, 125.3, 121.7, 92.0, 84.6, 38.3, 26.7, 22.6.

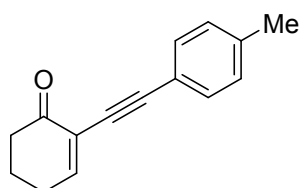

**2-(p-tolyethynyl)cyclohex-2-en-1-one (1d).**<sup>7</sup> <sup>1</sup>H NMR (500 MHz, CDCl<sub>3</sub>) δ 7.39 (d, *J* = 7.9 Hz, 2H), 7.34 (t, *J* = 4.4 Hz, 1H), 7.12 (d, *J* = 8.1 Hz, 2H), 2.57-2.45 (m, 4H), 2.34 (s, 3H), 2.09-2.04 (m, 2H). <sup>13</sup>C NMR (126 MHz, CDCl<sub>3</sub>) δ 195.6, 153.8, 138.5, 131.7, 129.0, 125.4, 119.8, 92.3, 83.1, 38.2, 26.5, 22.4, 21.5.

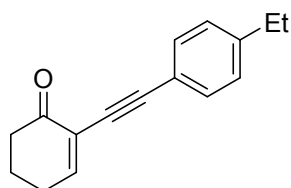

**2-((4-ethylphenyl)ethynyl)cyclohex-2-en-1-one (1e).** The product **1e** was obtained in 29% yield as a pale yellow solid after column chromatography. <sup>1</sup>H NMR (500 MHz, CDCl<sub>3</sub>) δ 7.42 (d, *J* = 8.1 Hz, 2H), 7.35 (t, *J* = 4.5 Hz, 1H), 7.14 (d, *J* = 8.1 Hz, 2H), 2.66-2.62 (m, 2H), 2.55-2.49 (m, 4H), 2.09-2.04 (m, 2H), 1.22 (t, *J* = 7.6 Hz, 3H). <sup>13</sup>C NMR (125 MHz, CDCl<sub>3</sub>) δ 195.7, 153.8, 144.8, 131.8, 127.8, 125.4, 120.0, 92.3, 83.1, 38.2, 28.8, 26.5, 22.4, 15.3. HRMS (ESI) [M+H]<sup>+</sup>: calculated for C<sub>16</sub>H<sub>17</sub>O: 225.1274 found 225.1287.

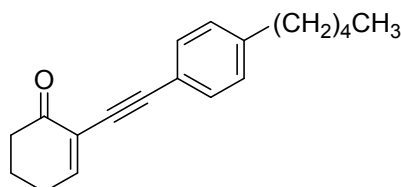

**2-((4-pentylphenyl)ethynyl)cyclohex-2-en-1-one (1f).**<sup>9</sup> <sup>1</sup>H NMR (500 MHz, CDCl<sub>3</sub>) δ 7.40 (d, *J* = 8.1 Hz, 2H), 7.33 (t, *J* = 4.5 Hz, 1H), 7.12 (d, *J* = 8.1 Hz, 2H), 2.60-2.57 (m, 2H), 2.55-2.48 (m, 4H), 2.09-2.04 (m, 2H), 1.63-1.58 (m, 2H), 1.33-1.29 (m, 4H), 0.88 (t, *J* = 7.0 Hz, 3H). <sup>13</sup>C NMR (125 MHz, CDCl<sub>3</sub>) δ 195.8, 153.9, 143.6, 131.9, 128.5, 125.7, 120.1, 92.5, 83.3, 38.3, 36.0, 31.6, 31.0, 26.7, 22.7, 22.6, 14.2. HRMS (ESI) [M+H]<sup>+</sup>: calculated for C<sub>19</sub>H<sub>23</sub>O: 267.1743, found 267.1741.

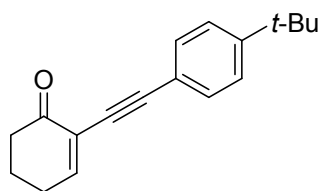

**2-((4-*tert*-butylphenyl)ethynyl)cyclohex-2-en-1-one (1g).**<sup>7</sup> <sup>1</sup>H NMR (500 MHz, CDCl<sub>3</sub>) δ 7.45 (d, *J* = 8.5 Hz, 2H), 7.37-7.32 (m, 3H), 2.47-2.44 (m, 2H), 2.42-2.39 (m, 2H), 2.10-2.05 (m, 2H), 1.32 (s, 9H). <sup>13</sup>C NMR (125 MHz, CDCl<sub>3</sub>) δ 195.6, 153.8, 151.7, 131.5, 125.4, 125.2, 119.8, 92.3, 83.2, 38.2, 34.8, 31.2, 26.5, 22.4.

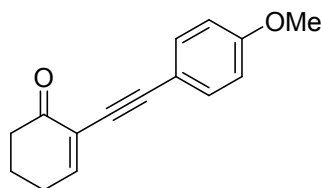

**2-((4-methoxyphenyl)ethynyl)cyclohex-2-en-1-one (1h).**<sup>7</sup> <sup>1</sup>H NMR (500 MHz, CDCl<sub>3</sub>) δ 7.44-7.42 (m, 2H), 7.34-7.29 (m, 1H), 6.85-6.83 (m, 2H), 3.81 (s, 3H), 2.55-2.48 (m, 4H), 2.08-2.03 (m, 2H). <sup>13</sup>C NMR (125 MHz, CDCl<sub>3</sub>) δ 195.7, 159.7, 153.4, 133.3, 125.5, 115.0, 113.9, 92.1, 82.5, 55.3, 38.2, 26.5, 22.5.

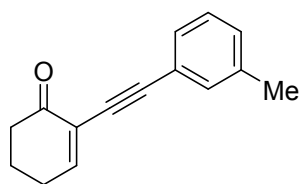

**2-((*m*-tolylethynyl)cyclohex-2-en-1-one (1i).**<sup>7</sup> <sup>1</sup>H NMR (500 MHz, CDCl<sub>3</sub>) δ 7.38-7.35 (m, 2H), 7.32 (d, *J* = 7.6 Hz, 1H), 7.22 (t, *J* = 7.6 Hz, 1H), 7.15 (d, *J* = 7.8 Hz, 1H), 2.58-2.50 (m, 4H), 2.35 (s, 3H), 2.12-2.05 (m, 2H). <sup>13</sup>C NMR (125 MHz, CDCl<sub>3</sub>) δ 195.5, 153.9, 137.9, 132.4, 129.3, 128.8, 128.1, 125.4, 122.7, 92.3, 83.4, 38.2, 26.5, 22.5, 21.2.

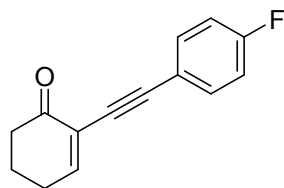

**2-((4-fluorophenyl)ethynyl)cyclohex-2-en-1-one (1j).**<sup>7</sup> <sup>1</sup>H NMR (500 MHz, CDCl<sub>3</sub>) δ 7.50- 7.45 (m, 2H), 7.35 (t, *J* = 4.5 Hz, 1H), 7.03- 6.98 (m, 2H), 2.58- 2.46 (m, 4H), 2.10- 2.04 (m, 2H). <sup>13</sup>C NMR (100 MHz, CDCl<sub>3</sub>) δ 195.2 , 162.3 (d, *J* = 249.2 Hz), 154.0 , 133.5 (d, *J* = 8.4 Hz), 125.0 , 118.8 (d, *J* = 3.5 Hz), 115.4 (d, *J* = 21.9 Hz) , 90.9 , 83.4 (d, *J* = 1.9 Hz), 38.2 , 26.6 , 22.5 .

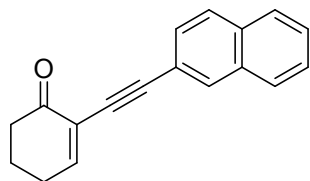

**2-(naphthalen-2-ylethynyl)cyclohex-2-en-1-one (1k).**<sup>9</sup> <sup>1</sup>H NMR (400 MHz, CDCl<sub>3</sub>) δ 8.03 (s, 1H), 7.81-7.76 (m, 3H), 7.54 (d, *J* = 8.6 Hz, 1H), 7.49-7.47 (m, 2H), 7.40 (t, *J* = 4.4 Hz, 1H), 2.58-2.50 (m, 4H), 2.12-2.05 (m, 2H). <sup>13</sup>C NMR (125 MHz, CDCl<sub>3</sub>) δ 195.7, 154.3, 132.9(2), 132.8(8), 131.8, 128.5, 127.9, 127.8(4), 127.7(5), 126.7(3), 126.5, 125.4, 120.2, 92.5, 84.1, 38.2, 26.6, 22.5.

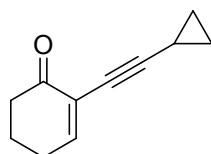

**2-(cyclopropylethynyl)cyclohex-2-en-1-one (1l).**<sup>8</sup> <sup>1</sup>H NMR (500 MHz, CDCl<sub>3</sub>) δ 7.18 (t, *J* = 4.5 Hz, 1H), 2.49-2.46 (m, 2H), 2.43-2.40 (m, 2H), 2.03-1.98 (m, 2H), 1.45-1.39 (m, 1H), 0.85-0.80 (m, 2H), 0.79-0.75 (m, 2H). <sup>13</sup>C NMR (125 MHz, CDCl<sub>3</sub>) δ 196.4, 153.3, 125.6, 96.6, 70.2, 38.3, 26.5, 22.6, 8.9, 0.4.

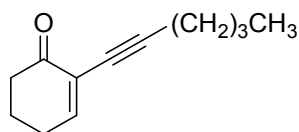

**2-(hex-1-yn-1-yl)cyclohex-2-en-1-one (1m).**<sup>8</sup> <sup>1</sup>H NMR (500 MHz, CDCl<sub>3</sub>) δ 7.20 (t, *J* = 4.4 Hz, 1H), 2.50-2.47 (m, 2H), 2.43 (q, *J* = 5.6 Hz, 2H), 2.37 (t, *J* = 7.1 Hz, 2H), 2.04-1.99 (m, 2H), 1.58-1.52 (m, 2H), 1.47-1.40 (m, 2H), 0.92 (t, *J* = 7.3 Hz, 3H). <sup>13</sup>C NMR (125 MHz, CDCl<sub>3</sub>) δ 196.4, 153.2, 125.7, 93.6, 75.0, 38.3, 30.9, 26.5, 22.6, 22.2, 19.3, 13.8.

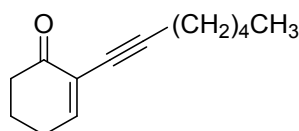

**2-(hept-1-yn-1-yl)cyclohex-2-en-1-one (1n).**<sup>10</sup> <sup>1</sup>H NMR (500 MHz, CDCl<sub>3</sub>) δ 7.21 (t, *J* = 4.4 Hz, 1H), 2.49 (d, *J* = 6.7 Hz, 2H), 2.44 (q, *J* = 5.7 Hz, 2H), 2.37 (t, *J* = 7.2 Hz, 2H), 2.05-2.00 (m, 2H), 1.60-1.55 (m, 2H), 1.44-1.29 (m, 4H), 0.91 (t, *J* = 7.1 Hz, 3H). <sup>13</sup>C NMR (125 MHz, CDCl<sub>3</sub>) δ 196.2, 153.1, 125.6, 93.5, 74.9, 38.1, 31.1, 28.4, 26.3, 22.5, 22.2, 19.4, 14.0.

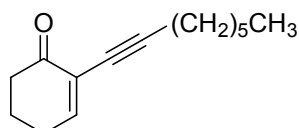



**2-(oct-1-yn-1-yl)cyclohex-2-en-1-one (1o).**<sup>11</sup> <sup>1</sup>H NMR (500 MHz, CDCl<sub>3</sub>) δ 7.21 (t, *J* = 4.4 Hz, 1H), 2.50 (t, *J* = 6.8 Hz, 2H), 2.45-2.42 (m, 2H), 2.38 (t, *J* = 7.2 Hz, 2H), 2.06-2.00 (m, 2H), 1.60-1.54 (m, 2H), 1.45-1.39 (m, 2H), 1.34-1.27 (m, 4H), 0.90 (t, *J* = 6.8 Hz, 3H). <sup>13</sup>C NMR (125 MHz, CDCl<sub>3</sub>) δ 196.2, 153.1, 125.6, 93.5, 74.9, 38.1, 31.4, 28.6(4), 28.6(1), 26.3, 22.5(5), 22.5(0), 19.5, 14.1.

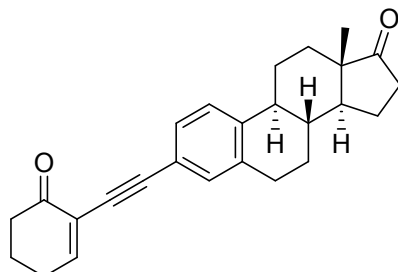

**(8R,9S,13S,14S)-13-methyl-3-((6-oxocyclohex-1-en-1-yl)ethynyl)-6,7,8,9,11,12,13,14,15,16-decahydro-17H-cyclopenta[*a*]phenanthren-17-one (1p).** The product **1p** was obtained in 53% yield as a pale yellow solid after column chromatography. <sup>1</sup>H NMR (400 MHz, CDCl<sub>3</sub>) δ 7.32 (t, *J* = 4.5 Hz, 1H), 7.28-7.20 (m, 3H), 2.89-2.85 (m, 2H), 2.55-2.44 (m, 4H), 2.42-2.35 (m, 1H), 2.34-2.22 (m, 1H), 2.18-1.93 (m, 6H), 1.65-1.39 (m, 7H), 0.90 (s, 3H). <sup>13</sup>C NMR (100 MHz, CDCl<sub>3</sub>) δ 220.7, 195.6, 153.7, 140.4, 136.5, 132.3, 129.1, 125.5, 125.2, 120.2, 92.3, 83.2, 50.5, 47.9, 44.5, 38.2, 37.9, 35.8, 31.6, 29.0, 26.5, 26.3, 25.6, 22.5, 21.6, 13.8. HRMS (ESI) [M+H]<sup>+</sup>: calculated for C<sub>26</sub>H<sub>29</sub>O<sub>2</sub>: 373.2162, found 373.2160

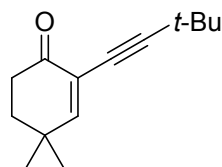

**2-(3,3-dimethylbut-1-yn-1-yl)-4,4-dimethylcyclohex-2-en-1-one (1q).**<sup>12</sup> <sup>1</sup>H NMR (500 MHz, CDCl<sub>3</sub>) δ 6.86 (s, 1H), 2.49 (t, *J* = 6.8 Hz, 2H), 1.85 (t, *J* = 6.8 Hz, 2H), 1.27 (s, 9H), 1.17 (s, 6H). <sup>13</sup>C NMR (100 MHz, CDCl<sub>3</sub>) δ 195.7, 161.6, 122.7, 101.2, 73.4, 35.7, 34.4, 33.5, 30.9, 27.9, 27.7.

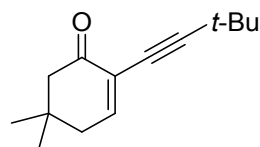

**2-(3,3-dimethylbut-1-yn-1-yl)-5,5-dimethylcyclohex-2-en-1-one (1r).**<sup>12</sup> <sup>1</sup>H NMR (400 MHz, CDCl<sub>3</sub>) δ 7.02 (t, *J* = 4.3 Hz, 1H), 2.33-2.24 (m, 4H), 1.26 (s, 9H), 1.02 (s, 6H). <sup>13</sup>C NMR (100 MHz, CDCl<sub>3</sub>) δ 196.1, 150.6, 124.8, 101.6, 73.3, 51.8, 40.5, 34.0, 31.0, 28.4, 28.0.

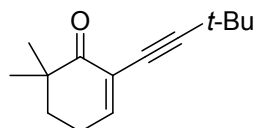

**2-(3,3-dimethylbut-1-yn-1-yl)-6,6-dimethylcyclohex-2-en-1-one (1s).**<sup>12</sup> <sup>1</sup>H NMR (500 MHz, CDCl<sub>3</sub>) δ 7.06 (t, *J* = 4.4 Hz, 1H), 2.43-2.39 (m, 2H), 1.82 (t, *J* = 6.1 Hz, 2H), 1.27 (s, 9H), 1.12 (s, 6H). <sup>13</sup>C NMR (100 MHz, CDCl<sub>3</sub>) δ 200.6, 150.9, 123.7, 100.8, 74.1, 41.7, 36.1, 31.1, 28.1, 24.4, 23.7.

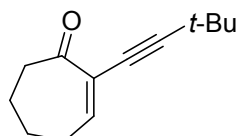

**2-(3,3-dimethylbut-1-yn-1-yl)cyclohept-2-en-1-one (1t).** The product **1t** was obtained in 44% yield as a pale yellow oil after column chromatography. <sup>1</sup>H NMR (500 MHz, CDCl<sub>3</sub>) δ 6.97 (t, *J* = 6.5 Hz, 1H), 2.64-2.61 (m, 2H), 2.50-2.39 (m, 2H), 1.83-1.74 (m, 4H), 1.26 (s, 9H). <sup>13</sup>C NMR (100 MHz, CDCl<sub>3</sub>) δ 201.0, 149.2, 128.7, 99.2, 75.8, 42.3, 31.0, 28.3, 28.0, 25.0, 21.6. HRMS (ESI) [M+H]<sup>+</sup>: calculated for C<sub>13</sub>H<sub>19</sub>O: 191.1430, found 191.1431

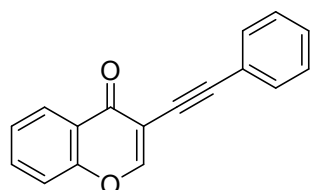

**3-(phenylethynyl)-4H-chromen-4-one (1u).**<sup>13</sup> <sup>1</sup>H NMR (500 MHz, CDCl<sub>3</sub>) δ 8.33-8.27 (m, 1H), 8.27 (s, 1H), 7.74-7.71 (m, 1H), 7.61-7.59 (m, 2H), 7.52-7.46 (m, 2H), 7.38-7.37 (m, 3H). <sup>13</sup>C NMR (125 MHz, CDCl<sub>3</sub>) δ 175.3, 157.9, 156.0, 134.0, 131.8, 128.6, 128.3, 126.3, 125.8, 123.6, 122.7, 118.2, 111.5, 95.0, 79.5.

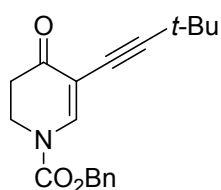

**benzyl 5-(3,3-dimethylbut-1-yn-1-yl)-4-oxo-3,4-dihydropyridine-1(2H)-carboxylate (1v).** The product **1v** was obtained in 21% yield as a gray solid after column chromatography. <sup>1</sup>H NMR (400 MHz, CDCl<sub>3</sub>) δ 8.05 (s, 1H), 7.38 (s, 5H), 5.25 (s, 2H), 4.00 (t, *J* = 7.3 Hz, 2H), 2.56 (t, *J* = 7.3 Hz, 2H), 1.25 (s, 9H). <sup>13</sup>C NMR (100 MHz, CDCl<sub>3</sub>) δ 189.9, 151.8, 145.1, 134.6, 128.7, 128.6, 128.4, 104.8, 100.7, 71.3, 69.4, 42.6, 35.6, 31.1, 28.1. HRMS (ESI) [M+H]<sup>+</sup>: calculated for C<sub>19</sub>H<sub>22</sub>NO<sub>3</sub>: 312.1594, found 312.1591.

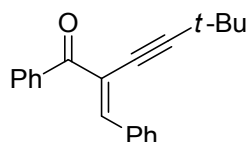

**(E)-2-benzylidene-5,5-dimethyl-1-phenylhex-3-yn-1-one (1w).** The product **1w** was obtained in 52% yield as a pale yellow oil after column chromatography.  $^1\text{H}$  NMR (400 MHz,  $\text{CDCl}_3$ )  $\delta$  8.09-8.06 (m, 2H), 7.94 (d,  $J = 8.0$  Hz, 2H), 7.57-7.53 (m, 1H), 7.50 (s, 1H), 7.46-7.40 (m, 5H), 1.26 (s, 9H).  $^{13}\text{C}$  NMR (125 MHz,  $\text{CDCl}_3$ )  $\delta$  194.0, 143.6, 137.3, 135.0, 132.2, 130.2, 130.1, 129.7, 128.3, 127.8, 121.5, 110.7, 77.2, 30.3, 28.7. HRMS (ESI)  $[\text{M}+\text{H}]^+$ : calculated for  $\text{C}_{21}\text{H}_{21}\text{O}$  289.1587, found 289.1590.

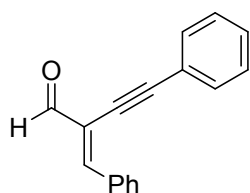

**(E)-2-benzylidene-4-phenylbut-3-ynal (1x).**<sup>14</sup>  $^1\text{H}$  NMR (500 MHz,  $\text{CDCl}_3$ )  $\delta$  9.68 (s, 1H), 8.22-8.13 (m, 2H), 7.64-7.62 (m, 2H), 7.57 (s, 1H), 7.53-7.51 (m, 3H), 7.43-7.40 (m, 3H).  $^{13}\text{C}$  NMR (125 MHz,  $\text{CDCl}_3$ )  $\delta$  190.9, 151.2, 134.2, 131.9, 131.6, 130.7, 129.1, 128.8, 128.5, 122.7, 122.5, 100.9, 83.2.

### 3 Further screening of transition metal catalyst

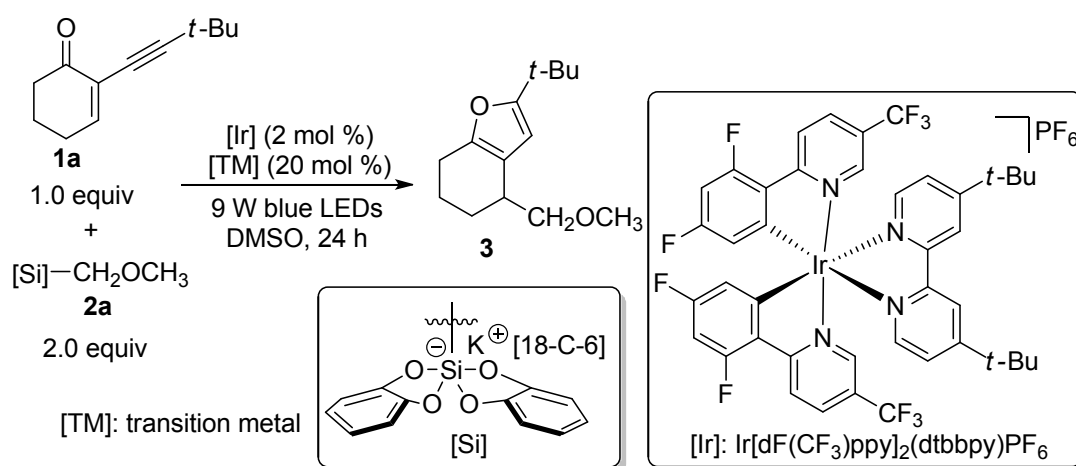

| Entry | Deviation from standard conditions                             | Yield of <b>3</b> (%) |
|-------|----------------------------------------------------------------|-----------------------|
| 1     | $\text{In}(\text{OTf})_3$ instead of $\text{Cu}(\text{OTf})_2$ | 8                     |
| 2     | $\text{Sc}(\text{OTf})_3$ instead of $\text{Cu}(\text{OTf})_2$ | 0                     |
| 3     | $\text{Ni}(\text{OTf})_2$ instead of $\text{Cu}(\text{OTf})_2$ | 0                     |

|   |                                                      |   |
|---|------------------------------------------------------|---|
| 4 | Ce(OTf) <sub>3</sub> instead of Cu(OTf) <sub>2</sub> | 0 |
| 5 | Y(OTf) <sub>3</sub> instead of Cu(OTf) <sub>2</sub>  | 0 |

## 4 General procedures of dual photoredox/copper-catalyzed reactions

### 4.1 General procedure for the preparation of polyfunctional furans **3**, **5a**, **6a**, **6e**, **10a-o**, **11a-c**, and **11f-i**.

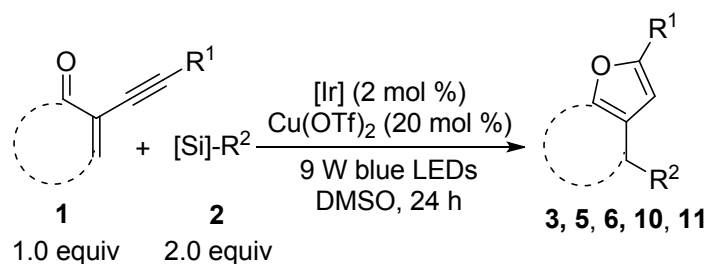

To an oven dried transparent 10 mL Schlenk tube equipped with stirring bar, Ir[dF(CF<sub>3</sub>)ppy]<sub>2</sub>(dtbbpy)PF<sub>6</sub> (4.5 mg, 0.004 mmol, 2 mol %) and the 2-(1-alkynyl)-2-alken-1-ones **1** (0.2 mmol, 1.0 equiv) were added. In a glovebox, potassium [18-Crown-6] bis(catecholato) alkylsilicate **2** (0.4 mmol, 2.0 equiv) and Cu(OTf)<sub>2</sub> (14.4 mg, 0.04 mmol, 20 mol %) were added in the tube. The tube was sealed with a rubber septum and removed from the glovebox. The tube was then charged with degassed DMSO (6.0 mL, 0.033 M) via a syringe under N<sub>2</sub>. The tube was irradiated with a 9 W blue LEDs strip spiraled within a bowel for 24 h (cooling with a fan). After the reaction was complete, the reaction solution was diluted with saturated Na<sub>2</sub>CO<sub>3</sub> aqueous solution, and was extracted with EtOAc (4 x 5 mL). The organic layer was washed with brine, dried over MgSO<sub>4</sub>, filtered, and solvent was evaporated to obtain crude product. Flash chromatography over silica gel afforded the product (eluent = petroleum ether / ethyl acetate 100:1 v/v).

#### 4.2 General procedure for the preparation of polyfunctional furans **5c**, **5e**, **5g**, **6c**, **6f**, **6h**, and **11e**.

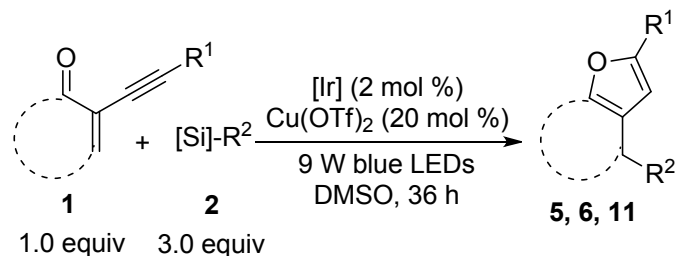

To an oven dried transparent 10 mL Schlenk tube equipped with stirring bar, Ir[dF(CF<sub>3</sub>)ppy]<sub>2</sub>(dtbbpy)PF<sub>6</sub> (4.5 mg, 0.004 mmol, 2 mol %) and the 2-(1-alkynyl)-2-alken-1-ones **1** (0.2 mmol, 1.0 equiv) were added. In a glovebox, potassium [18-Crown-6] bis(catecholato) alkylsilicate **2** (0.6 mmol, 3.0 equiv) and Cu(OTf)<sub>2</sub> (14.4 mg, 0.04 mmol, 20 mol %) were added in the tube. The tube was sealed with a rubber septum and removed from the glovebox. The tube was then charged with degassed DMSO (6.0 mL, 0.033 M) via a syringe under N<sub>2</sub>. The tube was irradiated with a 9 W blue LEDs strip spiraled within a bowel for 36 h (cooling with a fan). After the reaction was complete, the reaction solution was diluted with saturated Na<sub>2</sub>CO<sub>3</sub> aqueous solution, and was extracted with EtOAc (4 x 5 mL). The organic layer was washed with brine, dried over MgSO<sub>4</sub>, filtered, and solvent was evaporated to obtain crude product. Flash chromatography over silica gel afforded the product (eluent = petroleum ether / ethyl acetate 100:1 v/v).

#### 4.3 General procedure for the preparation of polyfunctional furans **5b**, **5d**, **5f**, **6b**, **6d**, and **6g**.

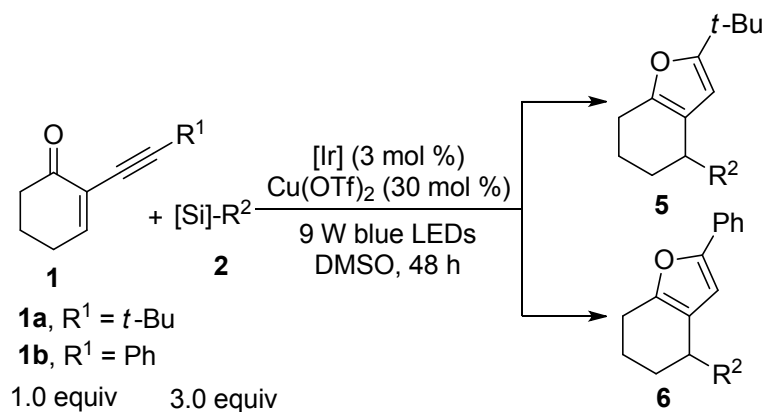

To an oven dried transparent 10 mL Schlenk tube equipped with stirring bar, Ir[dF(CF<sub>3</sub>)ppy]<sub>2</sub>(dtbbpy)PF<sub>6</sub> (4.5 mg, 0.004 mmol, 2 mol %) and the 2-alkynyl-cyclohexenones **1** (0.2 mmol, 1.0 equiv) were added. In a glovebox, potassium [18-Crown-6] bis(catecholato) alkylsilicate **2** (0.4 mmol, 2.0 equiv) and Cu(OTf)<sub>2</sub> (14.4 mg, 0.04 mmol, 20 mol %) were added in the tube. The tube was sealed with a rubber septum and removed from the glovebox. The tube was then charged with degassed DMSO (6.0 mL, 0.033 M) via a syringe under N<sub>2</sub>. The tube was irradiated with a 9 W blue LEDs strip spiraled within a bowl for 24 h (cooling with a fan). After 24 h, an additional portion of Ir[dF(CF<sub>3</sub>)ppy]<sub>2</sub>(dtbbpy)PF<sub>6</sub> (2.2 mg, 0.002 mmol, 1 mol %), potassium [18-Crown-6] bis(catecholato) alkylsilicate **2** (0.2 mmol, 1.0 equiv), and Cu(OTf)<sub>2</sub> (7.7 mg, 0.02 mmol, 10 mol %) were added under N<sub>2</sub>, and the reaction was stirred for an additional 24 h under irradiation. After the reaction was complete, the reaction solution was diluted with saturated Na<sub>2</sub>CO<sub>3</sub> aqueous solution, and was extracted with EtOAc (4 x 5 mL). The organic layer was washed with brine, dried over MgSO<sub>4</sub>, filtered, and solvent was evaporated to obtain crude product. Flash chromatography over silica gel afforded the product (eluent = petroleum ether / ethyl acetate 100:1 v/v).

#### 4.4 General procedure for the preparation of polyfunctional furans **9a-j**

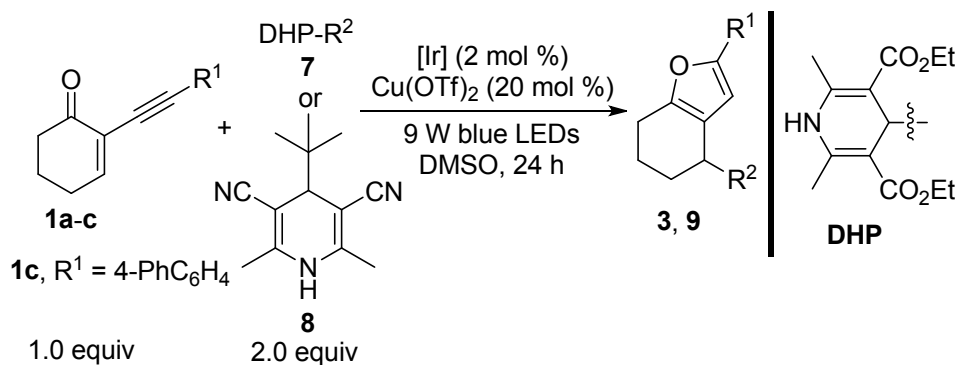

To an oven dried transparent 10 mL Schlenk tube equipped with stirring bar, Ir[dF(CF<sub>3</sub>)ppy]<sub>2</sub>(dtbbpy)PF<sub>6</sub> (4.5 mg, 0.004 mmol, 2 mol %), Hantzsch ester **7** or Hantzsch nitrile **8** (0.4 mmol, 2.0 equiv) and 2-alkynyl-cyclohexenones **1** (0.2 mmol, 1.0 equiv) were added. In a glovebox, Cu(OTf)<sub>2</sub> (14.4 mg, 0.04 mmol, 20 mol %) was added in the tube. The tube was sealed with a rubber septum and removed from the glovebox. The tube was then charged with degassed DMSO (6.0 mL, 0.033 M) via a syringe under N<sub>2</sub>. The tube was irradiated with a 9 W blue LEDs strip spiraled within a bowl for 24 h (cooling with a fan). After the reaction was complete, the reaction

solution was diluted with saturated Na<sub>2</sub>CO<sub>3</sub> aqueous solution, and was extracted with EtOAc (4 x 5 mL). The organic layer was washed with brine, dried over MgSO<sub>4</sub>, filtered, and solvent was evaporated to obtain crude product. Flash chromatography over silica gel afforded the product (eluent = petroleum ether / ethyl acetate 100:1 v/v).

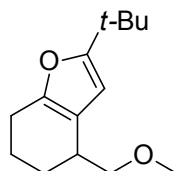

**2-(tert-butyl)-4-(methoxymethyl)-4,5,6,7-tetrahydrobenzofuran (3).** The product **3** was obtained in 87% (39.0 mg) yield as a colorless oil after column chromatography. <sup>1</sup>H NMR (500 MHz, CDCl<sub>3</sub>) δ 5.86 (s, 1H), 3.50-3.47 (m, 1H), 3.38 (s, 3H), 3.35-3.32 (m, 1H), 2.84-2.81 (m, 1H), 2.55-2.53 (m, 2H), 1.95-1.83 (m, 2H), 1.77-1.69 (m, 1H), 1.51-1.45 (m, 1H), 1.25 (s, 9H); <sup>13</sup>C NMR (125 MHz, CDCl<sub>3</sub>) δ 162.1, 149.1, 117.9, 101.6, 76.8, 58.8, 33.7, 32.5, 29.2, 26.4, 23.1, 21.1. HRMS (ESI) [M+Na]<sup>+</sup>: calculated for C<sub>14</sub>H<sub>22</sub>NaO<sub>2</sub>: 245.1512, found 245.1521.

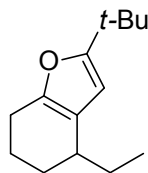

**2-(tert-butyl)-4-ethyl-4,5,6,7-tetrahydrobenzofuran (5a).** The product **5a** was obtained in 73% (30.2 mg) yield as a colorless oil after column chromatography; <sup>1</sup>H NMR (500 MHz, CDCl<sub>3</sub>) δ 5.82 (s, 1H), 2.55-2.52 (m, 2H), 2.44-2.39 (m, 1H), 1.95-1.86 (m, 2H), 1.72-1.67 (m, 2H), 1.38-1.31 (m, 2H), 1.26 (s, 9H), 0.96 (t, *J* = 7.4 Hz, 3H); <sup>13</sup>C NMR (125 MHz, CDCl<sub>3</sub>) δ 161.9, 148.2, 121.3, 101.6, 34.8, 32.5, 29.3, 28.6, 28.3, 23.2, 21.6, 11.8. HRMS (ESI) [M+H]<sup>+</sup>: calculated for C<sub>14</sub>H<sub>23</sub>O: 207.1743, found 207.1740.

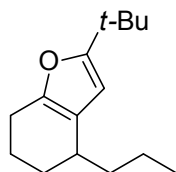

**2-(tert-butyl)-4-propyl-4,5,6,7-tetrahydrobenzofuran (5b).** The product **5b** was obtained in 86% (37.8 mg) yield as a colorless oil after column chromatography; <sup>1</sup>H NMR (500 MHz, CDCl<sub>3</sub>) δ 5.81 (s, 1H), 2.54-2.46 (m, 3H), 1.95-1.83 (m, 2H), 1.73-1.58 (m, 2H), 1.49-1.41 (m, 1H), 1.39-1.29 (m, 3H), 1.25 (s, 9H), 0.94 (t, *J* = 7.2 Hz, 3H); <sup>13</sup>C NMR (100 MHz, CDCl<sub>3</sub>) δ 161.9, 148.1, 121.5, 101.6, 38.1, 32.9, 32.5, 29.3, 29.2, 23.2, 21.6, 20.5, 14.4. HRMS (ESI) [M+H]<sup>+</sup>: calculated for C<sub>15</sub>H<sub>25</sub>O: 221.1900, found 221.1897.

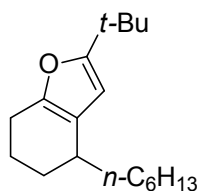

**2-(tert-butyl)-4-hexyl-4,5,6,7-tetrahydrobenzofuran (5c)**; The product **5c** was obtained in 68% (35.7 mg) yield as a colorless oil after column chromatography;  $^1\text{H}$  NMR (500 MHz,  $\text{CDCl}_3$ )  $\delta$  5.81 (s, 1H), 2.54-2.52 (m, 2H), 2.48-2.46 (m, 1H), 1.95-1.84 (m, 2H), 1.72-1.60 (m, 2H), 1.41-1.28 (m, 10H), 1.25 (s, 9H), 0.89 (t,  $J = 6.8$  Hz, 3H).  $^{13}\text{C}$  NMR (100 MHz,  $\text{CDCl}_3$ )  $\delta$  161.7, 148.0, 121.4, 101.5, 35.8, 33.3, 32.6, 32.0, 29.7, 29.4, 29.3, 27.5, 23.4, 22.8, 21.7, 14.3. HRMS (ESI)  $[\text{M}+\text{H}]^+$ : calculated for  $\text{C}_{18}\text{H}_{31}\text{O}$ : 263.2369, found 263.2369.

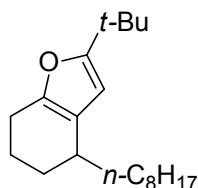

**2-(tert-butyl)-4-octyl-4,5,6,7-tetrahydrobenzofuran (5d)**. The product **5d** was obtained in 62% (36.1 mg) yield as a colorless oil after column chromatography;  $^1\text{H}$  NMR (500 MHz,  $\text{CDCl}_3$ )  $\delta$  5.82 (s, 1H), 2.54-2.48 (m, 3H), 1.94-1.85 (m, 2H), 1.73-1.61 (m, 2H), 1.42-1.28 (m, 14H), 1.26 (s, 9H), 0.91-0.88 (m, 3H);  $^{13}\text{C}$  NMR (100 MHz,  $\text{CDCl}_3$ )  $\delta$  161.6, 148.0, 121.4, 101.5, 35.8, 33.3, 32.6, 32.0, 30.1, 29.8, 29.5, 29.4, 29.3, 27.5, 23.4, 22.8, 21.7, 14.3. HRMS (ESI)  $[\text{M}+\text{H}]^+$ : calculated for  $\text{C}_{20}\text{H}_{35}\text{O}$ : 291.2682, found 291.2694.

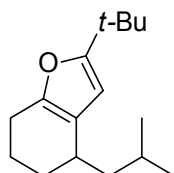

**2-(tert-butyl)-4-isobutyl-4,5,6,7-tetrahydrobenzofuran (5e)**. The product **5e** was obtained in 73% (34.4 mg) yield as a colorless oil after column chromatography;  $^1\text{H}$  NMR (500 MHz,  $\text{CDCl}_3$ )  $\delta$  5.80 (s, 1H), 2.54-2.52 (m, 2H), 2.49-2.46 (m, 1H), 1.96-1.84 (m, 2H), 1.79-1.65 (m, 2H), 1.47-1.42 (m, 1H), 1.30-1.27 (m, 1H), 1.25 (s, 9H), 1.24-1.20 (m, 1H), 0.94 (d,  $J = 6.6$  Hz, 3H), 0.91 (d,  $J = 6.6$  Hz, 3H);  $^{13}\text{C}$  NMR (100 MHz,  $\text{CDCl}_3$ )  $\delta$  161.7, 147.9, 121.5, 101.5, 45.4, 32.6, 30.7, 29.4, 25.5, 23.8, 23.4, 22.2, 21.6. HRMS (ESI)  $[\text{M}+\text{H}]^+$ : calculated for  $\text{C}_{16}\text{H}_{27}\text{O}$ : 235.2056, found 235.2061.

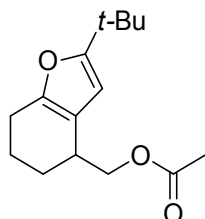

**(2-(tert-butyl)-4,5,6,7-tetrahydrobenzofuran-4-yl)methyl acetate (5f)**. The product **5f** was obtained in 87% (43.5 mg) yield as a colorless oil after column



chromatography;  $^1\text{H}$  NMR (500 MHz,  $\text{CDCl}_3$ )  $\delta$  5.83 (s, 1H), 4.19-4.15 (m, 1H), 4.03-3.99 (m, 1H), 2.90-2.84 (m, 1H), 2.56-2.53 (m, 2H), 2.09 (s, 3H), 1.96-1.84 (m, 2H), 1.78-1.70 (m, 1H), 1.50-1.46 (m, 1H), 1.25 (s, 9H);  $^{13}\text{C}$  NMR (100 MHz,  $\text{CDCl}_3$ )  $\delta$  171.1, 162.4, 149.4, 116.9, 101.5, 67.8, 32.8, 32.5, 29.2, 26.2, 23.0, 21.0, 20.8. HRMS (ESI)  $[\text{M}+\text{H}]^+$ : calculated for  $\text{C}_{15}\text{H}_{23}\text{O}_3$ : 251.1642, found 251.1643.

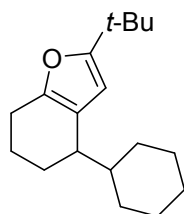

**2-(tert-butyl)-4-cyclohexyl-4,5,6,7-tetrahydrobenzofuran (5g).** The product **5g** was obtained in 56% (29.0 mg) yield as a colorless oil after column chromatography;  $^1\text{H}$  NMR (400 MHz,  $\text{CDCl}_3$ )  $\delta$  5.78 (s, 1H), 2.54-2.48 (m, 2H), 2.44-2.37 (m, 1H), 1.97-1.87 (m, 1H), 1.81-1.46 (m, 10H), 1.26 (s, 9H), 1.23-1.13 (m, 3H), 1.01-0.93 (m, 1H).  $^{13}\text{C}$  NMR (125 MHz,  $\text{CDCl}_3$ )  $\delta$  161.6, 148.7, 120.0, 102.1, 41.5, 39.0, 32.5, 31.5, 29.3, 29.2, 27.0, 26.9, 26.8, 24.9, 23.3, 21.9. HRMS (ESI)  $[\text{M}+\text{H}]^+$ : calculated for  $\text{C}_{18}\text{H}_{29}\text{O}$ : 261.2213, found 261.2209.

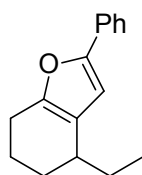

**4-ethyl-2-phenyl-4,5,6,7-tetrahydrobenzofuran (6a).** The product **6a** was obtained in 70% (3.8 mg) yield as a colorless oil after column chromatography;  $^1\text{H}$  NMR (500 MHz,  $\text{CDCl}_3$ )  $\delta$  7.62 (d,  $J = 7.3$  Hz, 2H), 7.36-7.32 (m, 2H), 7.21-7.18 (m, 1H), 6.55 (s, 1H), 2.68-2.63 (m, 2H), 2.54-2.49 (m, 1H), 2.02-1.95 (m, 1H), 1.94-1.88 (m, 1H), 1.79-1.71 (m, 2H), 1.47-1.35 (m, 2H), 1.00 (t,  $J = 7.4$  Hz, 3H);  $^{13}\text{C}$  NMR (125 MHz,  $\text{CDCl}_3$ )  $\delta$  151.5, 150.6, 131.4, 128.5, 126.5, 123.5, 123.2, 105.1, 34.6, 28.5, 28.2, 23.4, 21.4, 11.6; HRMS (ESI)  $[\text{M}+\text{Na}]^+$ : calculated for  $\text{C}_{16}\text{H}_{18}\text{NaO}$ : 249.1250, found 249.1256.

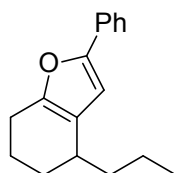

**2-phenyl-4-propyl-4,5,6,7-tetrahydrobenzofuran (6b).** The product **6b** was obtained in 37% (17.9 mg) yield as a colorless oil after column chromatography;  $^1\text{H}$  NMR (500 MHz,  $\text{CDCl}_3$ )  $\delta$  7.61 (d,  $J = 7.5$  Hz, 2H), 7.35-7.32 (m, 2H), 7.20-7.18 (m, 1H), 6.54 (s, 1H), 2.65-2.62 (m, 2H), 2.60-2.56 (m, 1H), 2.01-1.94 (m, 1H), 1.94-1.88 (m, 1H), 1.78-1.70 (m, 1H), 1.69-1.63 (m, 1H), 1.51-1.33 (m, 4H), 0.96 (t,  $J = 7.1$  Hz, 3H);  $^{13}\text{C}$  NMR (125 MHz,  $\text{CDCl}_3$ )  $\delta$  151.5, 150.5, 131.4, 128.5, 126.5, 123.7, 123.2,

105.1, 38.0, 32.8, 29.0, 23.4, 21.4, 20.4, 14.4; HRMS (ESI)  $[M+Na]^+$ : calculated for  $C_{17}H_{20}NaO$ : 263.1406, found 263.1408.

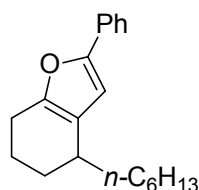

**4-hexyl-2-phenyl-4,5,6,7-tetrahydrobenzofuran (6c).** The product **6c** was obtained in 55% (31.2 mg) yield as a colorless oil after column chromatography;  $^1H$  NMR (500 MHz,  $CDCl_3$ )  $\delta$  7.62 (d,  $J = 7.7$  Hz, 2H), 7.36-7.33 (m, 2H), 7.21-7.18 (m, 1H), 6.54 (s, 1H), 2.66-2.61 (m, 2H), 2.58-2.56 (m, 1H), 2.02-1.95 (m, 1H), 1.94-1.88 (m, 1H), 1.79-1.66 (m, 2H), 1.45-1.27 (m, 10H), 0.92-0.90 (m, 3H);  $^{13}C$  NMR (125 MHz,  $CDCl_3$ )  $\delta$  151.5, 150.5, 131.5, 128.5, 126.5, 123.7, 123.2, 105.1, 35.7, 33.1, 31.9, 29.6, 29.0, 27.2, 23.4, 22.7, 21.4, 14.1; HRMS (ESI)  $[M+H]^+$ : calculated for  $C_{20}H_{27}O$ : 283.2055, found 283.2055.

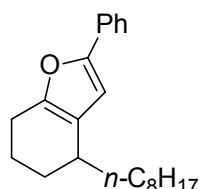

**4-octyl-2-phenyl-4,5,6,7-tetrahydrobenzofuran (6d).** The product **6d** was obtained in 41% (25.5 mg) yield as a colorless oil after column chromatography;  $^1H$  NMR (500 MHz,  $CDCl_3$ )  $\delta$  7.64-7.62 (m, 2H), 7.37-7.32 (m, 2H), 7.22-7.16 (m, 1H), 6.54 (s, 1H), 2.67-2.62 (m, 2H), 2.62-2.55 (m, 1H), 2.02-1.88 (m, 2H), 1.78-1.66 (m, 2H), 1.41-1.30 (m, 14H), 0.90 (t,  $J = 6.9$  Hz, 3H).  $^{13}C$  NMR (100 MHz,  $CDCl_3$ )  $\delta$  151.3, 150.3, 131.3, 128.4, 126.4, 123.6, 123.1, 105.0, 35.8, 33.2, 32.0, 30.1, 29.8, 29.5, 29.1, 27.4, 23.5, 22.8, 21.6, 14.3. HRMS (ESI)  $[M+H]^+$ : calculated for  $C_{22}H_{31}O$ : 311.2369, found 311.2365.

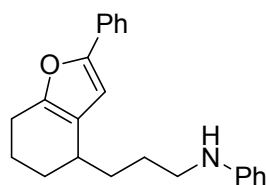

**N-(3-(2-phenyl-4,5,6,7-tetrahydrobenzofuran-4-yl)propyl)aniline (6e).** The product **6e** was obtained in 38% (25.1 mg) yield as a colorless oil after column chromatography;  $^1H$  NMR (500 MHz,  $CDCl_3$ )  $\delta$  7.61 (d,  $J = 7.8$  Hz, 2H), 7.36-7.33 (m, 2H), 7.22-7.17 (m, 3H), 6.72-6.70 (m, 1H), 6.62 (d,  $J = 8.0$  Hz, 2H), 6.53 (s, 1H), 3.64 (br, 1H), 3.19-3.13 (m, 2H), 2.70-2.61 (m, 3H), 2.01-1.91 (m, 2H), 1.85-1.69 (m, 4H), 1.55-1.51 (m, 1H), 1.44-1.40 (m, 1H);  $^{13}C$  NMR (125 MHz,  $CDCl_3$ )  $\delta$  151.7, 150.7, 148.4, 131.3, 129.2, 128.5, 126.6, 123.2, 123.1, 117.2, 112.7, 104.9, 44.3, 33.1, 32.9, 29.0, 27.2, 23.3, 21.4; HRMS (ESI)  $[M+H]^+$ : calculated for  $C_{23}H_{26}NO$ : 332.2009, found 332.2012.

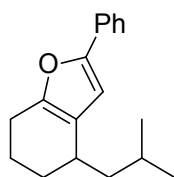

**4-isobutyl-2-phenyl-4,5,6,7-tetrahydrobenzofuran (6f).** The product **6f** was obtained in 22% (11.4 mg) yield as a colorless oil after column chromatography;  $^1\text{H}$  NMR (500 MHz,  $\text{CDCl}_3$ )  $\delta$  7.62 (d,  $J = 8.4$  Hz, 2H), 7.35-7.32 (m, 2H), 7.20-7.18 (m, 1H), 6.53 (s, 1H), 2.69-2.61 (m, 3H), 2.00-1.88 (m, 2H), 1.83-1.71 (m, 2H), 1.54-1.48 (m, 1H), 1.37-1.27 (m, 2H), 0.97 (d,  $J = 6.6$  Hz, 3H), 0.95 (d,  $J = 6.6$  Hz, 3H).  $^{13}\text{C}$  NMR (125 MHz,  $\text{CDCl}_3$ )  $\delta$  151.5, 150.5, 131.4, 128.5, 126.5, 123.8, 123.2, 105.1, 45.3, 30.5, 29.2, 25.4, 23.5, 23.4, 22.1, 21.2. HRMS (ESI)  $[\text{M}+\text{H}]^+$ : calculated for  $\text{C}_{18}\text{H}_{23}\text{O}$ : 255.1743, found 255.1742.

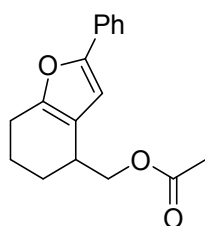

**(2-phenyl-4,5,6,7-tetrahydrobenzofuran-4-yl)methyl acetate (6g).** The product **6g** was obtained in 45% (24.2 mg) yield as a colorless oil after column chromatography;  $^1\text{H}$  NMR (500 MHz,  $\text{CDCl}_3$ )  $\delta$  7.61 (d,  $J = 7.3$  Hz, 2H), 7.36-7.33 (m, 2H), 7.22-7.19 (m, 1H), 6.56 (s, 1H), 4.21-4.18 (m, 1H), 4.14-4.09 (m, 1H), 2.99-2.95 (m, 1H), 2.68-2.65 (m, 2H), 2.12-2.10 (m, 3H), 2.01-1.89 (m, 2H), 1.83-1.78 (m, 1H), 1.56-1.52 (m, 1H);  $^{13}\text{C}$  NMR (125 MHz,  $\text{CDCl}_3$ )  $\delta$  171.1, 152.0, 151.5, 131.1, 128.6, 126.8, 123.3, 119.3, 104.8, 67.6, 32.8, 26.1, 23.2, 21.0, 20.8; HRMS (ESI)  $[\text{M}+\text{Na}]^+$ : calculated for  $\text{C}_{17}\text{H}_{18}\text{NaO}_3$ : 293.1148, found 293.1148.

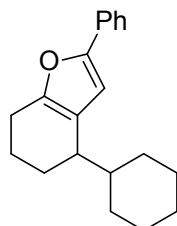

**4-cyclohexyl-2-phenyl-4,5,6,7-tetrahydrobenzofuran (6h).** The product **6h** was obtained in 51% (28.8 mg) yield as a colorless oil after column chromatography;  $^1\text{H}$  NMR (500 MHz,  $\text{CDCl}_3$ )  $\delta$  7.63 (d,  $J = 7.8$  Hz, 2H), 7.36-7.32 (m, 2H), 7.21-7.18 (m, 1H), 6.53 (s, 1H), 2.66-2.61 (m, 2H), 2.52-2.48 (m, 1H), 2.01-1.95 (m, 1H), 1.80-1.58 (m, 8H), 1.30-1.14 (m, 5H), 1.06-0.98 (m, 1H);  $^{13}\text{C}$  NMR (125 MHz,  $\text{CDCl}_3$ )  $\delta$  151.3, 151.2, 131.5, 128.5, 126.5, 123.2, 122.2, 105.6, 41.6, 38.9, 31.4, 29.1, 27.0, 26.9, 26.8, 24.8, 23.4, 21.8. HRMS (ESI)  $[\text{M}+\text{H}]^+$ : calculated for  $\text{C}_{20}\text{H}_{25}\text{O}$ : 281.1900, found 281.1896.

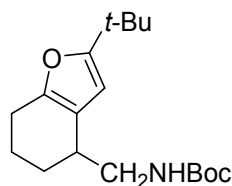

**tert-butyl ((2-(tert-butyl)-4,5,6,7-tetrahydrobenzofuran-4-yl)methyl)carbamate (9a).** The product **9a** was obtained in 39% (23.8 mg) yield as a colorless oil after column chromatography;  $^1\text{H}$  NMR (500 MHz,  $\text{CDCl}_3$ )  $\delta$  5.82 (s, 1H), 4.60 (br, 1H), 3.45-3.31 (m, 1H), 3.17-3.08 (m, 1H), 2.75-2.65 (m, 1H), 2.53 (t,  $J = 6.3$  Hz, 2H), 1.95-1.88 (m, 1H), 1.86-1.79 (m, 1H), 1.76-1.66 (m, 2H), 1.45 (s, 9H), 1.24 (s, 9H).  $^{13}\text{C}$  NMR (100 MHz,  $\text{CDCl}_3$ )  $\delta$  162.2, 155.9, 149.2, 117.8, 101.1, 79.1, 44.8, 33.9, 32.6, 29.3, 28.6, 27.0, 23.2, 21.3. HRMS (ESI)  $[\text{M} + \text{H}]^+$ : calculated for  $\text{C}_{18}\text{H}_{30}\text{NO}_3$ : 308.2220 found 308.2212.

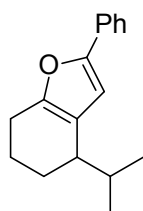

**4-isopropyl-2-phenyl-4,5,6,7-tetrahydrobenzofuran (9b).** The product **9b** was obtained in 50% (24.0 mg) yield as a colorless oil after column chromatography;  $^1\text{H}$  NMR (500 MHz,  $\text{CDCl}_3$ )  $\delta$  7.63 (d,  $J = 8.3$  Hz, 2H), 7.36-7.33 (m, 2H), 7.21-7.18 (m, 1H), 6.54 (s, 1H), 2.66-2.62 (m, 2H), 2.55-2.51 (m, 1H), 2.05-1.98 (m, 2H), 1.79-1.68 (m, 2H), 1.50-1.43 (m, 1H), 1.02 (d,  $J = 6.9$  Hz, 3H), 0.86 (d,  $J = 6.9$  Hz, 3H);  $^{13}\text{C}$  NMR (125 MHz,  $\text{CDCl}_3$ )  $\delta$  151.4, 151.3, 131.5, 128.5, 126.5, 123.2, 122.4, 105.4, 39.4, 30.9, 24.0, 23.4, 21.9, 20.6, 18.3; HRMS (ESI)  $[\text{M} + \text{Na}]^+$ : calculated for  $\text{C}_{17}\text{H}_{20}\text{NaO}$ : 263.1406, found 263.1402.

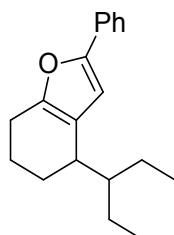

**4-(pentan-3-yl)-2-phenyl-4,5,6,7-tetrahydrobenzofuran (9c).** The product **9c** was obtained in 25% (13.4 mg) yield as a colorless oil after column chromatography;  $^1\text{H}$  NMR (500 MHz,  $\text{CDCl}_3$ )  $\delta$  7.65-7.60 (m, 2H), 7.37-7.32 (m, 2H), 7.22-7.17 (m, 1H), 6.51 (s, 1H), 2.82-2.76 (m, 1H), 2.70-2.57 (m, 2H), 2.07-1.98 (m, 1H), 1.79-1.65 (m, 2H), 1.54-1.43 (m, 2H), 1.40-1.26 (m, 3H), 1.16-1.06 (m, 1H), 0.97 (t,  $J = 7.3$  Hz, 3H), 0.88 (t,  $J = 7.4$  Hz, 3H).  $^{13}\text{C}$  NMR (100 MHz,  $\text{CDCl}_3$ )  $\delta$  151.3, 151.2, 131.3, 128.4, 126.3, 123.1, 122.5, 104.8, 44.9, 35.3, 24.2, 23.9, 23.5, 23.3, 22.5, 13.1, 12.7. HRMS (ESI)  $[\text{M} + \text{H}]^+$ : calculated for  $\text{C}_{19}\text{H}_{25}\text{O}$ : 269.1900, found 269.1899.

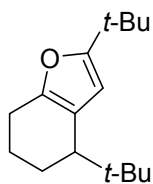

**2,4-di-tert-butyl-4,5,6,7-tetrahydrobenzofuran (9d).** The product **9d** was obtained in 33% (15.4 mg) yield as a colorless oil after column chromatography;  $^1\text{H}$  NMR (500 MHz,  $\text{CDCl}_3$ )  $\delta$  5.92 (s, 1H), 2.51-2.48 (m, 2H), 2.39-2.35 (m, 1H), 1.99-1.92 (m, 1H), 1.84-1.76 (m, 1H), 1.66-1.59 (m, 1H), 1.48-1.39 (m, 1H), 1.25 (s, 9H), 0.96 (s, 9H).  $^{13}\text{C}$  NMR (100 MHz,  $\text{CDCl}_3$ )  $\delta$  160.8, 149.7, 118.4, 103.6, 44.1, 34.1, 32.5, 29.4, 28.7, 26.1, 23.5, 22.7. HRMS (ESI)  $[\text{M}+\text{H}]^+$ : calculated for  $\text{C}_{16}\text{H}_{27}\text{O}$ : 235.2056, found 235.2051.

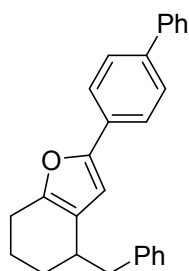

**2-([1,1'-biphenyl]-4-yl)-4-benzyl-4,5,6,7-tetrahydrobenzofuran (9e).** The product **9e** was obtained in 45% (32.9 mg) yield as a pale yellow solid after column chromatography;  $^1\text{H}$  NMR (400 MHz,  $\text{CDCl}_3$ )  $\delta$  7.67-7.56 (m, 6H), 7.47-7.41 (m, 2H), 7.37-7.29 (m, 3H), 7.26-7.20 (m, 3H), 6.38 (s, 1H), 3.08-3.00 (m, 1H), 2.97-2.88 (m, 1H), 2.71-2.62 (m, 3H), 2.01-1.92 (m, 1H), 1.83-1.69 (m, 2H), 1.47-1.38 (m, 1H).  $^{13}\text{C}$  NMR (100 MHz,  $\text{CDCl}_3$ )  $\delta$  151.3, 151.1, 140.7(3), 140.6(8), 139.2, 130.3, 129.2, 128.8, 128.3, 127.2(2), 127.1(8), 126.8, 126.0, 123.6, 123.1, 105.3, 42.1, 35.0, 28.8, 23.4, 21.1. HRMS (ESI)  $[\text{M}+\text{H}]^+$ : calculated for  $\text{C}_{27}\text{H}_{25}\text{O}$ : 365.1900, found 365.1905.

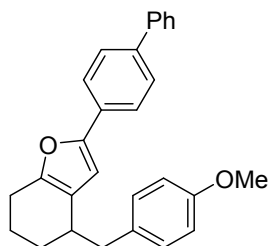

**2-([1,1'-biphenyl]-4-yl)-4-(4-methoxybenzyl)-4,5,6,7-tetrahydrobenzofuran (9f).** The product **9f** was obtained in 31% (24.4 mg) yield as a pale yellow solid after column chromatography;  $^1\text{H}$  NMR (400 MHz,  $\text{CDCl}_3$ )  $\delta$  7.67-7.56 (m, 6H), 7.47-7.41 (m, 2H), 7.36-7.31 (m, 1H), 7.15 (d,  $J = 8.6$  Hz, 2H), 6.87 (d,  $J = 8.6$  Hz, 2H), 6.39 (s, 1H), 3.82 (s, 3H), 3.00-2.94 (m, 1H), 2.91-2.84 (m, 1H), 2.70-2.64 (m, 2H), 2.63-2.57 (m, 1H), 2.00-1.93 (m, 1H), 1.81-1.71 (m, 2H), 1.45-1.39 (m, 1H).  $^{13}\text{C}$  NMR (125 MHz,  $\text{CDCl}_3$ )  $\delta$  157.9, 151.2, 151.1, 140.7, 139.1, 132.7, 130.3, 130.1, 128.8, 127.2(1), 127.1(6), 126.8, 123.6, 123.1, 113.6, 105.3, 55.3, 41.2, 35.1, 28.8, 23.4, 21.1. HRMS (ESI)  $[\text{M}+\text{H}]^+$ : calculated for  $\text{C}_{28}\text{H}_{27}\text{O}_2$ : 395.2006, found 395.2014.

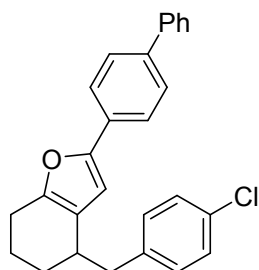

**2-([1,1'-biphenyl]-4-yl)-4-(4-chlorobenzyl)-4,5,6,7-tetrahydrobenzofuran (9g).**

The product **9g** was obtained in 46% (36.9 mg) yield as a pale yellow solid after column chromatography;  $^1\text{H}$  NMR (400 MHz,  $\text{CDCl}_3$ )  $\delta$  7.69-7.56 (m, 6H), 7.46-7.42 (m, 2H), 7.36-7.31 (m, 1H), 7.29 (d,  $J = 8.2$  Hz, 2H), 7.16 (d,  $J = 8.3$  Hz, 2H), 6.37 (s, 1H), 3.03-2.97 (m, 1H), 2.93-2.85 (m, 1H), 2.70-2.59 (m, 3H), 2.00-1.92 (m, 1H), 1.81-1.72 (m, 2H), 1.42-1.35 (m, 1H).  $^{13}\text{C}$  NMR (100 MHz,  $\text{CDCl}_3$ )  $\delta$  151.4, 151.1, 140.7, 139.3, 139.1, 131.8, 130.6, 130.2, 128.8, 128.4, 127.3, 127.2, 126.8, 123.7, 122.7, 105.1, 41.4, 34.9, 28.8, 23.4, 21.1. HRMS (ESI)  $[\text{M}+\text{H}]^+$ : calculated for  $\text{C}_{27}\text{H}_{24}\text{ClO}$ : 399.1510, found 399.1508.

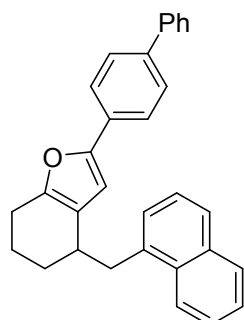

**2-([1,1'-biphenyl]-4-yl)-4-(naphthalen-1-ylmethyl)-4,5,6,7-tetrahydrobenzofuran (9h).**

The product **9h** was obtained in 16% (13.5 mg) yield as a pale yellow solid after column chromatography;  $^1\text{H}$  NMR (400 MHz,  $\text{CDCl}_3$ )  $\delta$  8.15 (d,  $J = 8.2$  Hz, 1H), 7.90 (d,  $J = 7.9$  Hz, 1H), 7.78 (d,  $J = 8.3$  Hz, 1H), 7.71-7.58 (m, 6H), 7.56-7.48 (m, 2H), 7.47-7.40 (m, 3H), 7.33 (d,  $J = 7.3$  Hz, 2H), 6.49 (s, 1H), 3.59 (dd,  $J = 13.3, 5.1$  Hz, 1H), 3.16-3.08 (m, 1H), 3.06-2.99 (m, 1H), 2.74-2.65 (m, 2H), 2.05-1.97 (m, 1H), 1.77-1.69 (m, 2H), 1.53-1.47 (m, 1H).  $^{13}\text{C}$  NMR (100 MHz,  $\text{CDCl}_3$ )  $\delta$  151.4, 151.1, 140.7, 139.2, 136.6, 134.0, 132.1, 130.3, 128.9, 128.8, 127.4, 127.2(4), 127.1(8), 126.9, 126.8, 125.8, 125.5, 125.3, 123.9, 123.7, 123.3, 105.3, 39.3, 34.0, 29.1, 23.5, 21.1. HRMS (ESI)  $[\text{M}+\text{H}]^+$ : calculated for  $\text{C}_{31}\text{H}_{27}\text{O}$ : 415.2056, found 415.2065.

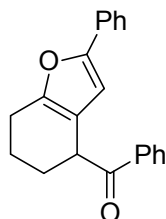

**phenyl(2-phenyl-4,5,6,7-tetrahydrobenzofuran-4-yl)methanone (9i).** The product **9i** was obtained in 25% (15.2 mg) yield as a colorless oil after column chromatography;  $^1\text{H}$  NMR (500 MHz,  $\text{CDCl}_3$ )  $\delta$  8.05 (d,  $J = 7.8$  Hz, 2H), 7.63-7.60 (m, 1H), 7.57-7.51 (m, 4H), 7.33-7.30 (m, 2H), 7.20-7.17 (m, 1H), 6.31 (s, 1H), 4.61-

4.58 (m, 1H), 2.80-2.70 (m, 2H), 2.16-2.08 (m, 2H), 2.04-1.99 (m, 1H), 1.94-1.87 (m, 1H);  $^{13}\text{C}$  NMR (125 MHz,  $\text{CDCl}_3$ )  $\delta$  200.9, 152.1, 151.9, 136.6, 133.2, 131.1, 128.7, 128.6, 128.5, 126.8, 123.4, 117.1, 105.3, 41.8, 27.1, 23.0, 21.4; HRMS (ESI)  $[\text{M}+\text{Na}]^+$ : calculated for  $\text{C}_{21}\text{H}_{18}\text{NaO}_2$ : 325.1199, found 325.1197.

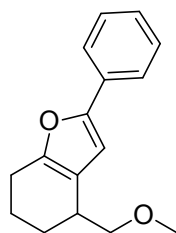

**4-(methoxymethyl)-2-phenyl-4,5,6,7-tetrahydrobenzofuran (10a).** The product **10a** was obtained in 57% (27.8 mg) yield as a colorless oil after column chromatography;  $^1\text{H}$  NMR (500 MHz,  $\text{CDCl}_3$ )  $\delta$  7.63-7.61 (m, 2H), 7.35-7.32 (m, 2H), 7.21-7.18 (m, 1H), 6.60 (s, 1H), 3.51-3.48 (m, 1H), 3.43-3.39 (m, 4H), 2.92-2.87 (m, 1H), 2.67-2.64 (m, 2H), 2.01-1.95 (m, 1H), 1.93-1.87 (m, 1H), 1.83-1.74 (m, 1H), 1.55-1.49 (m, 1H);  $^{13}\text{C}$  NMR (125 MHz,  $\text{CDCl}_3$ )  $\delta$  151.8, 151.3, 131.3, 128.5, 126.59, 123.3, 120.4, 105.2, 76.7, 58.9, 33.7, 26.3, 23.3, 21.1; HRMS (ESI)  $[\text{M}+\text{Na}]^+$ : calculated for  $\text{C}_{16}\text{H}_{18}\text{NaO}_2$ : 265.1199, found 265.1196.

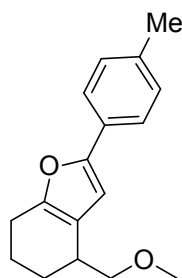

**4-(methoxymethyl)-2-(p-tolyl)-4,5,6,7-tetrahydrobenzofuran (10b).** The product **10b** was obtained in 69% (35.3 mg) yield as a colorless oil after column chromatography;  $^1\text{H}$  NMR (500 MHz,  $\text{CDCl}_3$ )  $\delta$  7.52 (d,  $J = 8.2$  Hz, 2H), 7.15 (d,  $J = 7.9$  Hz, 2H), 6.54 (s, 1H), 3.52-3.49 (m, 1H), 3.42-3.39 (m, 4H), 2.92-2.87 (m, 1H), 2.68-2.62 (m, 2H), 2.34 (s, 3H), 2.01-1.94 (m, 1H), 1.93-1.87 (m, 1H), 1.82-1.74 (m, 1H), 1.55-1.49 (m, 1H);  $^{13}\text{C}$  NMR (125 MHz,  $\text{CDCl}_3$ )  $\delta$  152.0, 150.8, 136.3, 129.2, 128.6, 123.2, 120.2, 104.4, 76.8, 58.9, 33.7, 26.3, 23.2, 21.2, 21.1; HRMS (ESI)  $[\text{M}+\text{Na}]^+$ : calculated for  $\text{C}_{17}\text{H}_{20}\text{NaO}_2$ : 279.1356, found 279.1359.

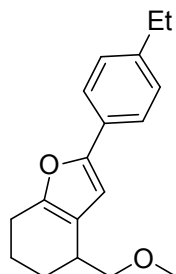

**2-(4-ethylphenyl)-4-(methoxymethyl)-4,5,6,7-tetrahydrobenzofuran (10c).** The product **10c** was obtained in 60% (32.3 mg) yield as a colorless oil after column chromatography;  $^1\text{H}$  NMR (500 MHz,  $\text{CDCl}_3$ )  $\delta$  7.53 (d,  $J = 8.2$  Hz, 2H), 7.17 (d,  $J = 7.9$  Hz, 2H), 6.53 (s, 1H), 3.52-3.49 (m, 1H), 3.42-3.39 (m, 4H), 2.92-2.86 (m, 1H),

2.66-2.62 (m, 4H), 2.01-1.94 (m, 1H), 1.93-1.87 (m, 1H), 1.82-1.74 (m, 1H), 1.53-1.49 (m, 1H), 1.24 (t,  $J = 7.6$  Hz, 3H);  $^{13}\text{C}$  NMR (125 MHz,  $\text{CDCl}_3$ )  $\delta$  152.1, 150.9, 142.8, 128.9, 128.0, 123.4, 120.2, 104.5, 76.8, 58.9, 33.7, 28.6, 26.3, 23.3, 21.1, 15.5; HRMS (ESI)  $[\text{M}+\text{H}]^+$ : calculated for  $\text{C}_{18}\text{H}_{23}\text{O}_2$ : 271.1693, found 271.1705.

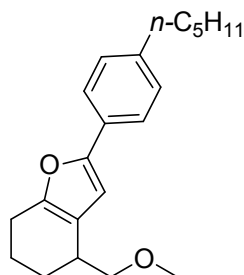

**5-(methoxymethyl)-2-(4-pentylphenyl)-4,5,6,7-tetrahydrobenzofuran (10d).** The product **10d** was obtained in 52% (32.4 mg) yield as a colorless oil after column chromatography;  $^1\text{H}$  NMR (500 MHz,  $\text{CDCl}_3$ )  $\delta$  7.53 (d,  $J = 7.5$  Hz, 2H), 7.16 (d,  $J = 7.7$  Hz, 2H), 6.54 (s, 1H), 3.52-3.49 (m, 1H), 3.42-3.39 (m, 4H), 2.91-2.89 (m, 1H), 2.66-2.64 (m, 2H), 2.61-2.58 (m, 2H), 2.00-1.95 (m, 1H), 1.93-1.88 (m, 1H), 1.82-1.75 (m, 1H), 1.65-1.61 (m, 2H), 1.56-1.49 (m, 1H), 1.38-1.31 (m, 4H), 0.91-0.88 (m, 3H);  $^{13}\text{C}$  NMR (125 MHz,  $\text{CDCl}_3$ )  $\delta$  152.1, 150.9, 141.5, 128.9, 128.6, 123.3, 120.2, 104.5, 76.8, 58.9, 35.7, 33.7, 31.5, 31.1, 26.3, 23.3, 22.5, 21.1, 14.0. HRMS (ESI)  $[\text{M}+\text{H}]^+$ : calculated for  $\text{C}_{21}\text{H}_{29}\text{O}_2$ : 313.2162, found 313.2167.

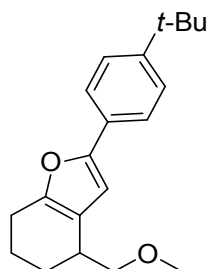

**2-(4-tert-butylphenyl)-4-(methoxymethyl)-4,5,6,7-tetrahydrobenzofuran (10e).** The product **10e** was obtained in 68% (40.5 mg) yield as a pale yellow solid after column chromatography;  $^1\text{H}$  NMR (500 MHz,  $\text{CDCl}_3$ )  $\delta$  7.55 (d,  $J = 8.5$  Hz, 2H), 7.37 (d,  $J = 8.5$  Hz, 2H), 6.55 (s, 1H), 3.53-3.50 (m, 1H), 3.43-3.40 (m, 4H), 2.93-2.87 (m, 1H), 2.67-2.65 (m, 2H), 2.02-1.95 (m, 1H), 1.94-1.88 (m, 1H), 1.83-1.75 (m, 1H), 1.56-1.50 (m, 1H), 1.34 (s, 9H);  $^{13}\text{C}$  NMR (125 MHz,  $\text{CDCl}_3$ )  $\delta$  152.0, 150.9, 149.6, 128.7, 125.5, 123.1, 120.2, 104.6, 76.8, 58.9, 34.6, 33.7, 31.3, 26.3, 23.3, 21.1. HRMS (ESI)  $[\text{M}+\text{H}]^+$ : calculated for  $\text{C}_{20}\text{H}_{27}\text{O}_2$ : 299.2006, found 299.2009.

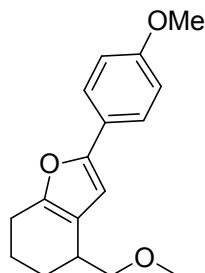

**4-(methoxymethyl)-2-(4-methoxyphenyl)-4,5,6,7-tetrahydrobenzofuran (10f).** The product **10f** was obtained in 60% (32.6 mg) yield as a colorless oil after column



chromatography;  $^1\text{H}$  NMR (500 MHz,  $\text{CDCl}_3$ )  $\delta$  7.55 (d,  $J = 8.8$  Hz, 2H), 6.89 (d,  $J = 8.8$  Hz, 2H), 6.47 (s, 1H), 3.82 (s, 3H), 3.52-3.49 (m, 1H), 3.42-3.39 (m, 4H), 2.92-2.85 (m, 1H), 2.68-2.62 (m, 2H), 2.01-1.94 (m, 1H), 1.94-1.86 (m, 1H), 1.83-1.74 (m, 1H), 1.56-1.48 (m, 1H).  $^{13}\text{C}$  NMR (125 MHz,  $\text{CDCl}_3$ )  $\delta$  158.6, 151.9, 150.6, 124.7, 124.5, 120.2, 114.0, 103.6, 76.8, 58.9, 55.3, 33.7, 26.3, 23.3, 21.2. HRMS (ESI)  $[\text{M}+\text{H}]^+$ : calculated for  $\text{C}_{17}\text{H}_{21}\text{O}_3$ : 273.1485, found 273.1483.

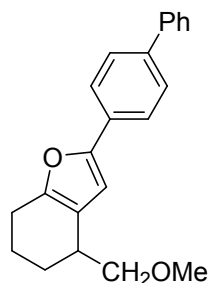

**2-((1,1'-biphenyl)-4-yl)-4-(methoxymethyl)-4,5,6,7-tetrahydrobenzofuran (10g).**

The product **10g** was obtained in 66% (42.2 mg) yield as a pale yellow solid after column chromatography;  $^1\text{H}$  NMR (500 MHz,  $\text{CDCl}_3$ )  $\delta$  7.69 (d,  $J = 8.4$  Hz, 2H), 7.63-7.58 (m, 4H), 7.46-7.42 (m, 2H), 7.35-7.32 (m, 1H), 6.65 (s, 1H), 3.53-3.49 (m, 1H), 3.44-3.41 (m, 4H), 2.94-2.89 (m, 1H), 2.70-2.66 (m, 2H), 2.02-1.95 (m, 1H), 1.95-1.88 (m, 1H), 1.84-1.76 (m, 1H), 1.56-1.49 (m, 1H).  $^{13}\text{C}$  NMR (100 MHz,  $\text{CDCl}_3$ )  $\delta$  151.6, 151.5, 140.7, 139.2, 130.3, 128.7, 127.2(1), 127.1(7), 126.8, 123.7, 120.6, 105.5, 76.8, 58.9, 33.7, 26.3, 23.3, 21.1. HRMS (ESI)  $[\text{M}+\text{H}]^+$ : calculated for  $\text{C}_{22}\text{H}_{23}\text{O}_2$ : 319.1693, found 319.1689.

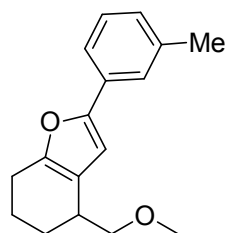

**4-(methoxymethyl)-2-(*m*-tolyl)-4,5,6,7-tetrahydrobenzofuran (10h).** The product **10h** was obtained in 56% (28.8 mg) yield as a colorless oil after column chromatography;  $^1\text{H}$  NMR (500 MHz,  $\text{CDCl}_3$ )  $\delta$  7.46-7.42 (m, 2H), 7.26-7.22 (m, 1H), 7.02 (d,  $J = 7.5$  Hz, 1H), 6.59 (s, 1H), 3.52-3.49 (m, 1H), 3.43-3.40 (m, 4H), 2.91-2.88 (m, 1H), 2.67-2.65 (m, 2H), 2.37 (s, 3H), 2.02-1.95 (m, 1H), 1.93-1.88 (m, 1H), 1.83-1.75 (m, 1H), 1.56-1.49 (m, 1H);  $^{13}\text{C}$  NMR (125 MHz,  $\text{CDCl}_3$ )  $\delta$  151.9, 151.1, 138.1, 131.2, 128.4, 127.4, 123.9, 120.5, 120.3, 105.1, 76.8, 58.9, 33.7, 26.3, 23.5, 21.5, 21.1. HRMS (ESI)  $[\text{M}+\text{Na}]^+$ : calculated for  $\text{C}_{17}\text{H}_{20}\text{NaO}_2$ : 279.1356, found 279.1359.

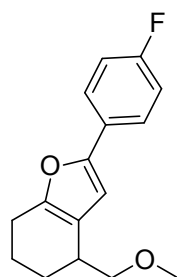

**2-(4-fluorophenyl)-4-(methoxymethyl)-4,5,6,7-tetrahydrobenzofuran (10i).** The product **10i** was obtained in 58% (30.0 mg) yield as a colorless oil after column chromatography;  $^1\text{H}$  NMR (500 MHz,  $\text{CDCl}_3$ )  $\delta$  7.59-7.56 (m, 2H), 7.05-7.02 (m, 2H), 6.53 (s, 1H), 3.50-3.47 (m, 1H), 3.43-3.40 (m, 4H), 2.91-2.86 (m, 1H), 2.68-2.61 (m, 2H), 2.00-1.94 (m, 1H), 1.92-1.87 (m, 1H), 1.82-1.74 (m, 1H), 1.55-1.48 (m, 1H);  $^{13}\text{C}$  NMR (125 MHz,  $\text{CDCl}_3$ )  $\delta$  161.7 (d,  $J = 244.4$  Hz), 151.3, 150.9, 127.7 (d,  $J = 3.1$  Hz), 124.9 (d,  $J = 7.8$  Hz), 120.5, 115.50 (d,  $J = 21.9$  Hz), 104.9, 58.9, 33.7, 26.2, 23.2, 21.1, one carbon atom was not assigned due to the overlap with the peaks of  $\text{CDCl}_3$ ;  $^{19}\text{F}$  NMR (376 MHz,  $\text{CDCl}_3$ )  $\delta$  -115.5. HRMS (ESI)  $[\text{M}+\text{Na}]^+$ : calculated for  $\text{C}_{16}\text{H}_{17}\text{FNaO}_2$ : 283.1105, found 283.1109.

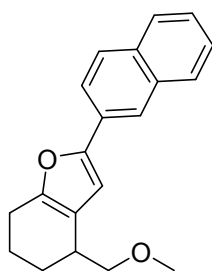

**4-(methoxymethyl)-2-(naphthalen-2-yl)-4,5,6,7-tetrahydrobenzofuran (10j).** The product **10j** was obtained in 76% (44.5 mg) yield as a colorless oil after column chromatography;  $^1\text{H}$  NMR (400 MHz,  $\text{CDCl}_3$ )  $\delta$  8.09 (s, 1H), 7.86-7.72 (m, 4H), 7.49-7.39 (m, 2H), 6.74 (s, 1H), 3.56-3.52 (m, 1H), 3.47-3.43 (m, 4H), 2.97-2.90 (m, 1H), 2.75-2.67 (m, 2H), 2.06-1.98 (m, 1H), 1.97-1.89 (m, 1H), 1.87-1.76 (m, 1H), 1.60-1.50 (m, 1H).  $^{13}\text{C}$  NMR (125 MHz,  $\text{CDCl}_3$ )  $\delta$  151.9, 151.7, 133.6, 132.3, 128.6, 128.2, 128.0, 127.7, 126.3, 125.5, 122.2, 121.2, 120.6, 106.0, 76.8, 58.9, 33.7, 26.3, 23.3, 21.1. HRMS (ESI)  $[\text{M}+\text{H}]^+$ : calculated for  $\text{C}_{20}\text{H}_{21}\text{O}_2$ : 293.1536, found 293.1537.

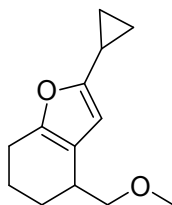

**2-cyclopropyl-4-(methoxymethyl)-4,5,6,7-tetrahydrobenzofuran (10k).** The product **10k** was obtained in 58% (24.0 mg) yield as a colorless oil after column chromatography;  $^1\text{H}$  NMR (500 MHz,  $\text{CDCl}_3$ )  $\delta$  5.87 (s, 1H), 3.45-3.42 (m, 1H), 3.37 (s, 3H), 3.34-3.31 (m, 1H), 2.81-2.76 (m, 1H), 2.53-2.50 (m, 2H), 1.94-1.79 (m, 3H), 1.75-1.67 (m, 1H), 1.50-1.43 (m, 1H), 0.83-0.79 (m, 2H), 0.74-0.68 (m, 2H);  $^{13}\text{C}$  NMR (125 MHz,  $\text{CDCl}_3$ )  $\delta$  155.2, 149.1, 118.5, 103.5, 77.2, 58.8, 33.7, 26.4, 23.1, 21.1, 8.8, 6.4, 6.3; HRMS (ESI)  $[\text{M}+\text{Na}]^+$ : calculated for  $\text{C}_{13}\text{H}_{18}\text{NaO}_2$ : 229.1199, found 229.1205.

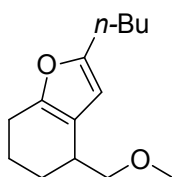

**2-butyl-4-(methoxymethyl)-4,5,6,7-tetrahydrobenzofuran (10l).** The product **10l** was obtained in 19% (8.6 mg) yield as a colorless oil after column chromatography;  $^1\text{H}$  NMR (500 MHz,  $\text{CDCl}_3$ )  $\delta$  5.88 (s, 1H), 3.47-3.44 (m, 1H), 3.38 (s, 3H), 3.35-3.32 (m, 1H), 2.83-2.78 (m, 1H), 2.57-2.52 (m, 4H), 1.95-1.82 (m, 2H), 1.76-1.68 (m, 1H), 1.62-1.56 (m, 2H), 1.51-1.44 (m, 1H), 1.39-1.35 (m, 2H), 0.92 (t,  $J = 7.3$  Hz, 3H);  $^{13}\text{C}$  NMR (125 MHz,  $\text{CDCl}_3$ )  $\delta$  154.4, 149.2, 118.3, 104.4, 76.8, 58.8, 33.7, 30.3, 27.9, 26.4, 23.1, 22.4, 21.1, 13.9; HRMS (ESI)  $[\text{M}+\text{H}]^+$ : calculated for  $\text{C}_{14}\text{H}_{23}\text{O}_2$ : 223.1693, found 223.1692.

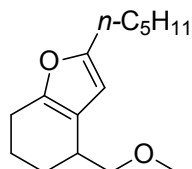

**4-(methoxymethyl)-2-pentyl-4,5,6,7-tetrahydrobenzofuran (10m).** The product **10m** was obtained in 46% (21.7 mg) yield as a colorless oil after column chromatography;  $^1\text{H}$  NMR (500 MHz,  $\text{CDCl}_3$ )  $\delta$  5.89 (s, 1H), 3.47-3.44 (m, 1H), 3.38 (s, 3H), 3.36-3.32 (m, 1H), 2.84-2.79 (m, 1H), 2.56-2.52 (m, 4H), 1.95-1.83 (m, 2H), 1.76-1.69 (m, 1H), 1.64-1.60 (m, 2H), 1.52-1.43 (m, 1H), 1.35-1.32 (m, 4H), 0.92-0.89 (m, 3H);  $^{13}\text{C}$  NMR (125 MHz,  $\text{CDCl}_3$ )  $\delta$  154.4, 149.2, 118.4, 104.4, 76.8, 58.8, 33.7, 31.5, 28.2, 27.9, 26.4, 23.1, 22.5, 21.2, 14.0. HRMS (ESI)  $[\text{M}+\text{H}]^+$ : calculated for  $\text{C}_{15}\text{H}_{25}\text{O}_2$ : 237.1849, found 237.1848.

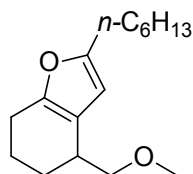

**2-hexyl-4-(methoxymethyl)-4,5,6,7-tetrahydrobenzofuran (10n).** The product **10n** was obtained in 70% (35.2 mg) yield as a colorless oil after column chromatography;  $^1\text{H}$  NMR (500 MHz,  $\text{CDCl}_3$ )  $\delta$  5.89 (s, 1H), 3.48-3.43 (m, 1H), 3.38 (s, 3H), 3.36-3.32 (m, 1H), 2.84-2.78 (m, 1H), 2.56-2.51 (m, 4H), 1.95-1.82 (m, 2H), 1.77-1.68 (m, 1H), 1.64-1.57 (m, 2H), 1.52-1.45 (m, 1H), 1.38-1.25 (m, 6H), 0.89 (t,  $J = 6.5$  Hz, 3H).  $^{13}\text{C}$  NMR (125 MHz,  $\text{CDCl}_3$ )  $\delta$  154.4, 149.2, 118.4, 104.4, 76.8, 58.8, 33.7, 31.6, 29.0, 28.2(3), 28.2(1), 26.4, 23.1, 22.6, 21.2, 14.1. HRMS (ESI)  $[\text{M}+\text{H}]^+$ : calculated for  $\text{C}_{16}\text{H}_{27}\text{O}_2$ : 251.2006, found 251.2011.

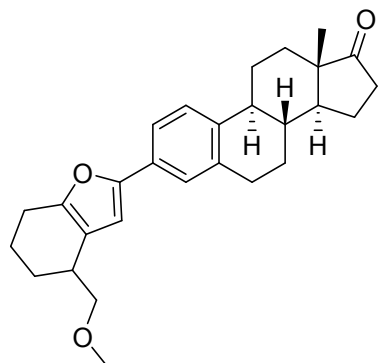

**(8R,9S,13S,14S)-3-(4-(methoxymethyl)-4,5,6,7-tetrahydrobenzofuran-2-yl)-13-methyl-6,7,8,9,11,12,13,14,15,16-decahydro-17H-cyclopenta[*a*]phenanthren-17-one (10o).** The product **10o** was obtained in 66% (55.2 mg) yield as a pale yellow solid after column chromatography;  $^1\text{H}$  NMR (500 MHz,  $\text{CDCl}_3$ )  $\delta$  7.44-7.36 (m, 2H), 7.29-7.28(s, 1H), 6.57 (s, 1H), 3.55-3.50 (m, 1H), 3.44-3.41 (m, 4H), 2.99-2.87 (m, 3H), 2.71-2.63 (m, 2H), 2.57-2.49 (m, 1H), 2.49-2.42 (m, 1H), 2.37-2.28 (m, 1H), 2.22-2.13 (m, 1H), 2.13-1.97 (m, 4H), 1.96-1.89 (m, 1H), 1.85-1.75 (m, 1H), 1.70-1.46 (m, 7H), 0.95 (s, 3H).  $^{13}\text{C}$  NMR (100 MHz,  $\text{CDCl}_3$ )  $\delta$  220.5, 151.7, 150.8, 138.1, 136.4, 128.8, 125.4, 123.6, 120.8, 120.1, 104.6, 76.8, 58.9, 50.6, 48.1, 44.5, 38.2, 35.9, 33.8, 31.7, 29.5, 26.6, 26.4, 25.8, 23.4, 21.7, 21.2, 14.0. HRMS (ESI)  $[\text{M}+\text{H}]^+$ : calculated for  $\text{C}_{28}\text{H}_{35}\text{O}_3$ : 419.2581, found 419.2583.

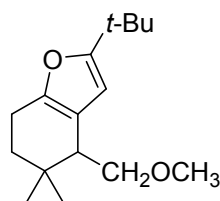

**2-(tert-butyl)-4-(methoxymethyl)-5,5-dimethyl-4,5,6,7-tetrahydrobenzofuran (11a).** The product **11a** was obtained in 86% (43.1 mg) yield as a colorless oil after column chromatography;  $^1\text{H}$  NMR (500 MHz,  $\text{CDCl}_3$ )  $\delta$  5.89 (s, 1H), 3.60- 3.54 (m, 1H), 3.39-3.32 (m, 4H), 2.54 -2.44 (m, 3H), 1.60-1.57 (m, 2H), 1.25 (s, 9H), 1.06 (s, 3H), 0.85 (s, 3H).  $^{13}\text{C}$  NMR (100 MHz,  $\text{CDCl}_3$ )  $\delta$  162.3, 147.3, 118.5, 102.6, 74.7, 58.6, 43.3, 36.9, 32.5, 32.4, 29.2, 28.6, 22.2, 20.5. HRMS (ESI)  $[\text{M}+\text{H}]^+$ : calculated for  $\text{C}_{16}\text{H}_{27}\text{O}_2$ : 251.2006, found 251.2002.

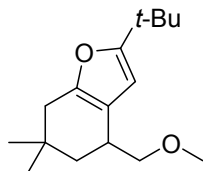

**2-(tert-butyl)-4-(methoxymethyl)-6,6-dimethyl-4,5,6,7-tetrahydrobenzofuran (11b).** The product **11b** was obtained in 64% (32.1 mg) yield as a colorless oil after column chromatography;  $^1\text{H}$  NMR (400 MHz,  $\text{CDCl}_3$ )  $\delta$  5.87 (s, 1H), 3.58-3.54 (m, 1H), 3.40 (s, 3H), 3.35-3.30 (m, 1H), 2.82-2.74 (m, 1H), 2.41-2.27 (m, 2H), 1.62-1.57 (m, 1H), 1.24 (s, 9H), 1.21-1.14 (m, 1H), 1.08 (s, 3H), 0.94 (s, 3H).  $^{13}\text{C}$  NMR (125 MHz,  $\text{CDCl}_3$ )  $\delta$  162.5, 148.8, 116.5, 101.0, 77.3, 58.9, 41.0, 36.9, 32.5, 31.8, 31.7, 31.4, 29.2, 25.6. HRMS (ESI)  $[\text{M}+\text{H}]^+$ : calculated for  $\text{C}_{16}\text{H}_{27}\text{O}_2$ : 251.2006, found 251.2006.

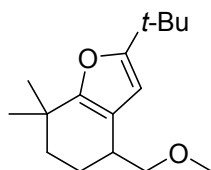

**2-(tert-butyl)-4-(methoxymethyl)-7,7-dimethyl-4,5,6,7-tetrahydrobenzofuran (11c).** The product **11c** was obtained in 64% (32.0 mg) yield as a colorless oil after column chromatography;  $^1\text{H}$  NMR (500 MHz,  $\text{CDCl}_3$ )  $\delta$  5.79 (s, 1H), 3.50-3.47 (m,

1H), 3.38 (s, 3H), 3.38-3.28 (m, 1H), 2.81-2.76 (m, 1H), 1.88-1.82 (m, 1H), 1.69-1.63 (m, 1H), 1.59-1.52 (m, 2H), 1.24 (s, 9H), 1.22 (s, 3H), 1.20 (s, 3H). <sup>13</sup>C NMR (100 MHz, CDCl<sub>3</sub>) δ 161.6, 155.5, 115.9, 101.1, 76.8, 58.8, 37.4, 34.3, 32.7, 32.2, 29.2, 27.8, 23.9. HRMS (ESI) [M+H]<sup>+</sup>: calculated for C<sub>16</sub>H<sub>27</sub>O<sub>2</sub>: 251.2006, found 251.2016.

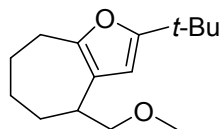

**2-(tert-butyl)-4-(methoxymethyl)-5,6,7,8-tetrahydro-4H-cyclohepta[b]furan (11d).**

The product **11d** was obtained in 32% (15.2 mg) yield as a colorless oil after column chromatography; <sup>1</sup>H NMR (500 MHz, CDCl<sub>3</sub>) δ 5.76 (s, 1H), 3.51-3.48 (m, 1H), 3.47-3.40 (m, 1H), 3.38 (s, 3H), 2.81-2.76 (m, 1H), 2.75-2.69 (m, 2H), 1.89-1.65 (m, 6H), 1.23 (s, 9H). <sup>13</sup>C NMR (100 MHz, CDCl<sub>3</sub>) δ 160.0, 150.8, 120.8, 103.6, 75.5, 58.7, 36.4, 32.4, 30.9, 29.3, 28.9, 27.3, 26.6. HRMS (ESI) [M+H]<sup>+</sup>: calculated for C<sub>15</sub>H<sub>25</sub>O<sub>2</sub>: 237.1849, found 237.1855.

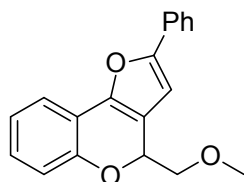

**4-(methoxymethyl)-2-phenyl-4H-furo[3,2-c]chromene (11f).** The product **11f** was obtained in 11% (6.4 mg) yield as a colorless oil after column chromatography; <sup>1</sup>H NMR (500 MHz, CDCl<sub>3</sub>) δ 7.71 (d, *J* = 7.5 Hz, 2H), 7.48 (d, *J* = 7.5 Hz, 1H), 7.42-7.39 (m, 2H), 7.30-7.27 (m, 1H), 7.14-7.11 (m, 1H), 6.98-6.94 (m, 2H), 6.58 (s, 1H), 5.70-5.67 (m, 1H), 3.84-3.80 (m, 1H), 3.73-3.70 (m, 1H), 3.48 (s, 3H); <sup>13</sup>C NMR (125 MHz, CDCl<sub>3</sub>) δ 154.4, 152.3, 145.8, 130.3, 128.7, 128.6, 127.6, 123.7, 121.4, 119.4, 116.5, 116.2, 116.0, 103.4, 75.8, 75.1, 59.6. HRMS (ESI) [M+H]<sup>+</sup>: calculated for C<sub>19</sub>H<sub>17</sub>O<sub>3</sub>: 293.1172, found 293.1179.

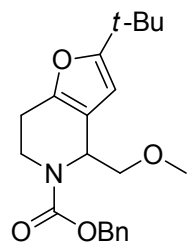

**benzyl-2-(tert-butyl)-4-(methoxymethyl)-6,7-dihydrofuro[3,2-c]pyridine-5(4H)-carboxylate (11g).**

The product **11g** was obtained in 76% (54.2 mg) yield as a colorless oil after column chromatography; <sup>1</sup>H NMR (500 MHz, CDCl<sub>3</sub>, isolated as a mixture of rotamers) δ 7.42-7.29 (m, 5H), 5.85-5.83 (m, 1H), 5.27-5.10 (m, 3H), 4.59-4.36 (m, 1H), 3.68-3.48 (m, 2H), 3.38 (m, 3H), 3.30-3.17 (m, 1H), 2.78 (br, 1H), 2.60-2.50 (m, 1H), 1.27 (s, 9H). <sup>13</sup>C NMR (100 MHz, CDCl<sub>3</sub>, observed as a mixture of rotamers) δ 163.0, 155.4, 155.2, 147.0, 146.5, 136.6, 128.3, 127.8, 127.7, 115.8, 115.5, 100.8, 74.1, 73.8, 67.3, 59.1, 50.8, 38.9, 38.6, 32.7, 29.2, 24.0, 23.7. HRMS (ESI) [M+H]<sup>+</sup>: calculated for C<sub>21</sub>H<sub>28</sub>NO<sub>4</sub>: 358.2013, found 358.2013.

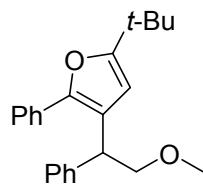

**5-(tert-butyl)-3-(2-methoxy-1-phenylethyl)-2-phenylfuran (11h).** The product **11h** was obtained in 8% (5.9 mg) yield as a colorless oil after column chromatography;  $^1\text{H}$  NMR (500 MHz,  $\text{CDCl}_3$ )  $\delta$  7.53-7.51 (m, 2H), 7.36-7.32 (m, 6H), 7.26-7.21 (m, 2H), 6.10 (s, 1H), 4.45 (t,  $J = 7.1$  Hz, 1H), 3.88-3.77 (m, 2H), 3.34 (s, 3H), 1.34 (s, 9H).  $^{13}\text{C}$  NMR (100 MHz,  $\text{CDCl}_3$ )  $\delta$  162.9, 147.2, 142.0, 131.5, 128.3, 128.2, 128.0, 126.6, 126.4, 125.7, 121.3, 104.1, 76.9, 58.9, 42.3, 32.8, 29.3. HRMS (ESI)  $[\text{M}+\text{H}]^+$ : calculated for  $\text{C}_{23}\text{H}_{27}\text{O}_2$ : 335.2006, found 335.2003.

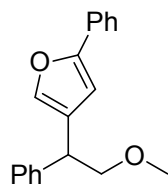

**5-(2-methoxy-1-phenylethyl)-2-phenylfuran (11i).** The product **11i** was obtained in 26% (14.6 mg) yield as a colorless oil after column chromatography;  $^1\text{H}$  NMR (500 MHz,  $\text{CDCl}_3$ )  $\delta$  7.64-7.62 (m, 2H), 7.37-7.22 (m, 9H), 6.54 (s, 1H), 4.16 (t,  $J = 7.0$  Hz, 1H), 3.88-3.79 (m, 2H), 3.40 (s, 3H);  $^{13}\text{C}$  NMR (125 MHz,  $\text{CDCl}_3$ )  $\delta$  153.9, 141.5, 139.1, 130.9, 128.6, 128.5, 128.2, 128.1, 127.2, 126.8, 123.7, 106.1, 76.5, 58.9, 42.8. HRMS (ESI)  $[\text{M}+\text{H}]^+$ : calculated for  $\text{C}_{19}\text{H}_{19}\text{O}_2$ : 279.1380, found 279.1383.

## 5 Mechanistic experiments

### 5.1 Cyclopropanation vs cycloisomerization

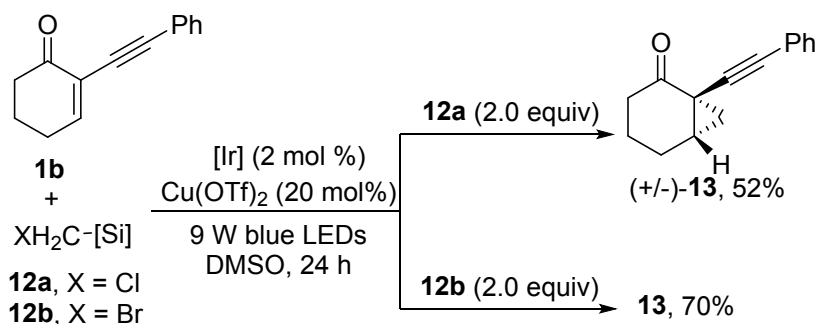

To an oven dried transparent 10 mL Schlenk tube equipped with stirring bar, Ir[dF(CF<sub>3</sub>)ppy]<sub>2</sub>(dtbbpy)PF<sub>6</sub> (4.5 mg, 0.004 mmol, 2 mol %) and the 2-(3,3-dimethylbut-1-yn-1-yl)cyclohex-2-en-1-one **1a** (39.2mg, 0.2 mmol, 1.0 equiv) were added. In a glovebox, **12a** or **12b** (0.4 mmol, 2.0 equiv) and Cu(OTf)<sub>2</sub> (14.4 mg, 0.04 mmol, 20 mol %) were added in the tube. The tube was sealed with a rubber septum and removed from the glovebox. The tube was then charged with degassed DMSO (6.0 mL, 0.033 M) via a syringe under N<sub>2</sub>. The tube was irradiated with a 9 W blue LEDs strip spiraled within a bowel for 24 h (cooling with a fan). After the reaction was complete, the reaction solution was diluted with saturated Na<sub>2</sub>CO<sub>3</sub> aqueous solution, and was extracted with EtOAc (4 x 5 mL). The organic layer was washed with brine, dried over MgSO<sub>4</sub>, filtered, and solvent was evaporated to obtain crude product. Flash chromatography over silica gel afforded the product **13** (eluent = petroleum ether /ethyl acetate 20:1 v/v).

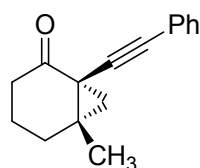

(1*R*\*, 6*S*\*)-6-methyl-1-(phenylethynyl)bicyclo[4.1.0]heptan-2-one (**13**).<sup>15</sup> The product **13** was obtained as a pale yellow solid after column chromatography; <sup>1</sup>H NMR (500 MHz, CDCl<sub>3</sub>) δ 7.46-7.43 (m, 2H), 7.30 -7.27 (m, 3H), 2.44-2.39 (m, 1H), 2.26-2.19 (m, 2H), 2.13-2.02 (m, 2H), 1.82-1.77 (m, 2H), 1.69-1.64 (m, 2H). <sup>13</sup>C NMR (125 MHz, CDCl<sub>3</sub>) δ 203.8, 131.9, 128.1, 127.9, 123.2, 89.2, 79.8, 36.4, 29.4, 27.0, 21.3(3), 21.2(7), 18.3.

## 5.2 Deuteration study

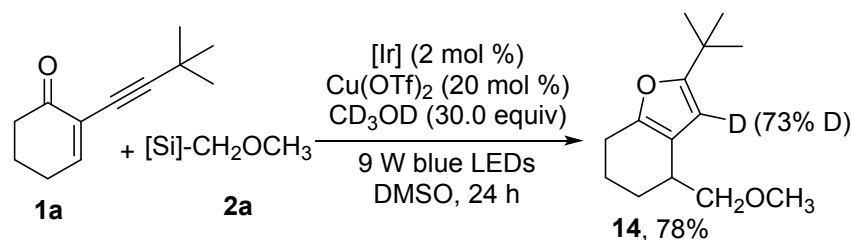

To an oven dried transparent 10 mL Schlenk tube equipped with stirring bar, Ir[dF(CF<sub>3</sub>)ppy]<sub>2</sub>(dtbbpy)PF<sub>6</sub> (4.5 mg, 0.004 mmol, 2 mol %) and the 2-(3,3-dimethylbut-1-yn-1-yl)cyclohex-2-en-1-one **1a** (0.2 mmol, 1.0 equiv) were added. In a glovebox, potassium [18-Crown-6] bis(catecholato) alkylsilicate **2a** (238.9 mg, 0.4 mmol, 2.0 equiv) and Cu(OTf)<sub>2</sub> (14.4 mg, 0.04 mmol, 20 mol %) were added in the tube. The tube was sealed with a rubber septum and removed from the glovebox. The tube was then charged with degassed DMSO (6.0 mL, 0.033 M) via a syringe under N<sub>2</sub>. Then CD<sub>3</sub>OD (244.0 μL, 6 mmol, 30.0 equiv) was added via a micro syringe. The tube was irradiated with a 9 W blue LEDs strip spiraled within a bowel for 24 (cooling with a fan). After the reaction was complete, the reaction solution was diluted with saturated Na<sub>2</sub>CO<sub>3</sub> aqueous solution, and was extracted with EtOAc (4 x 5 mL). The organic layer was washed with brine, dried over MgSO<sub>4</sub>, filtered, and solvent was evaporated to obtain crude product. Flash chromatography over silica gel afforded the product **14** in 78% yield (33.1 mg) (eluent = petroleum ether /ethyl acetate 100:1 v/v). The product **14** with 73% D-incorporation was determined by <sup>1</sup>H NMR.

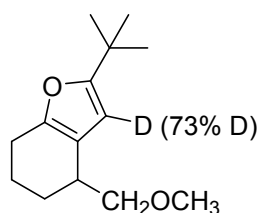

**2-(*tert*-butyl)-4-(methoxymethyl)-4,5,6,7-tetrahydrobenzofuran-3-*d* (**14**)**, colorless oil. The product **14** was obtained as an inseparable mixture after column chromatography; <sup>1</sup>H NMR (500 MHz, CDCl<sub>3</sub>) δ 5.84 (s, 0.27H), 3.49-3.45 (m, 1H), 3.37 (s, 3H), 3.34-3.29 (m, 1H), 2.83-2.76 (m, 1H), 2.52 (t, *J* = 5.7 Hz, 2H), 1.95-1.79 (m, 2H), 1.78-1.65 (m, 1H), 1.51-1.41 (m, 1H), 1.23 (s, 9H). <sup>13</sup>C NMR (125 MHz, CDCl<sub>3</sub>) δ 162.1, 162.0, 149.1, 117.9(4), 117.8(7), 101.6, 101.4 (t, *J* = 25.7 Hz, C-D), 76.8, 58.8, 33.7, 32.4(9), 32.4(8), 29.2, 26.4, 23.1, 21.1. <sup>2</sup>H NMR (61 MHz, CHCl<sub>3</sub>) δ



5.96. HRMS (ESI)  $[M+H]^+$ : calculated for  $C_{14}H_{22}DO_2$ : 224.1755, found 224.1753

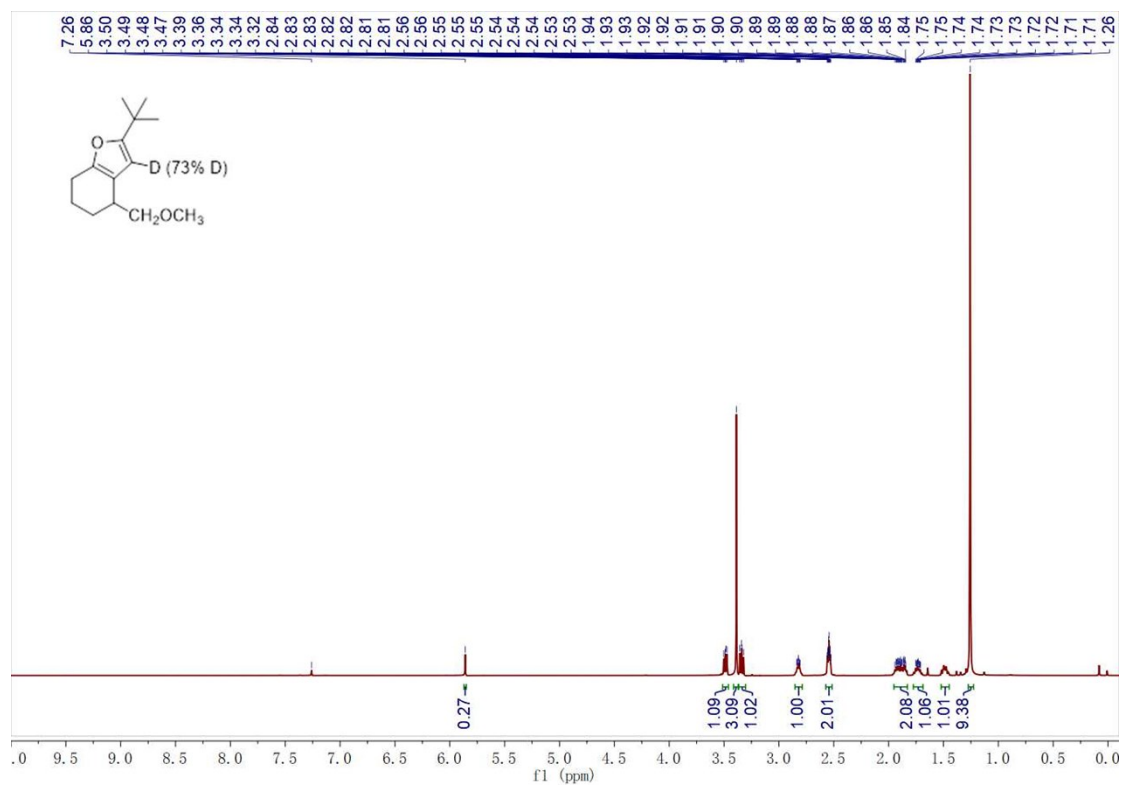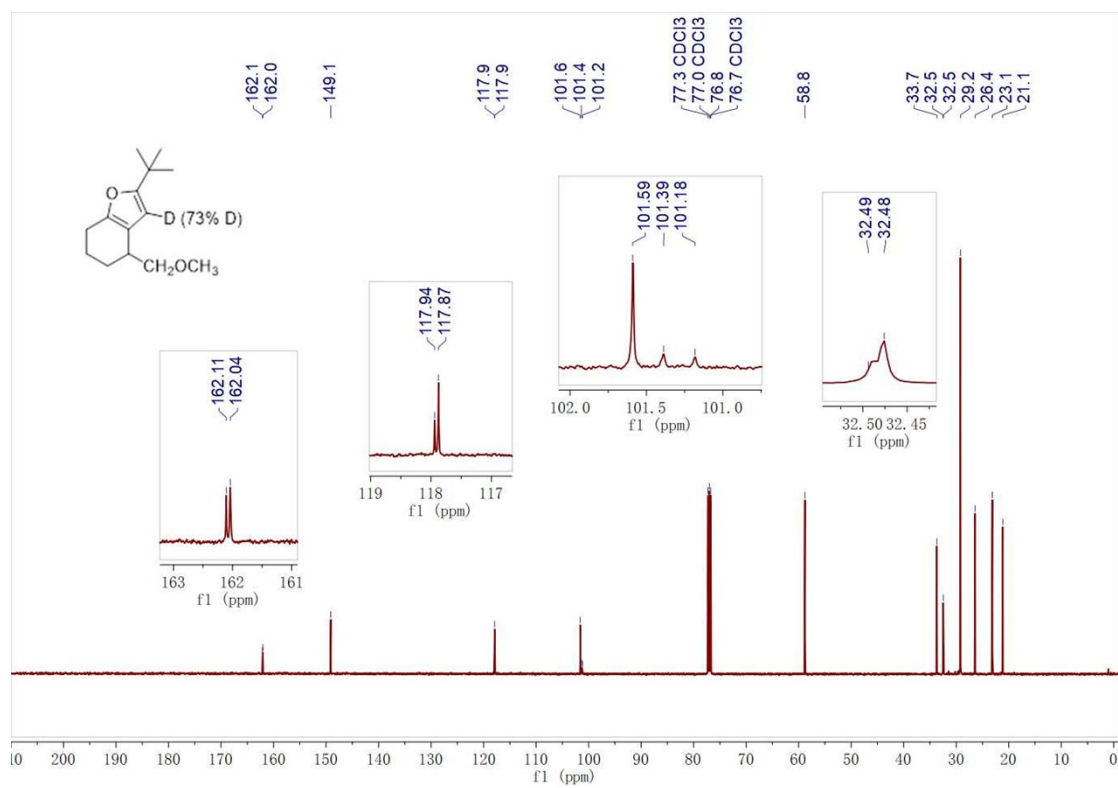

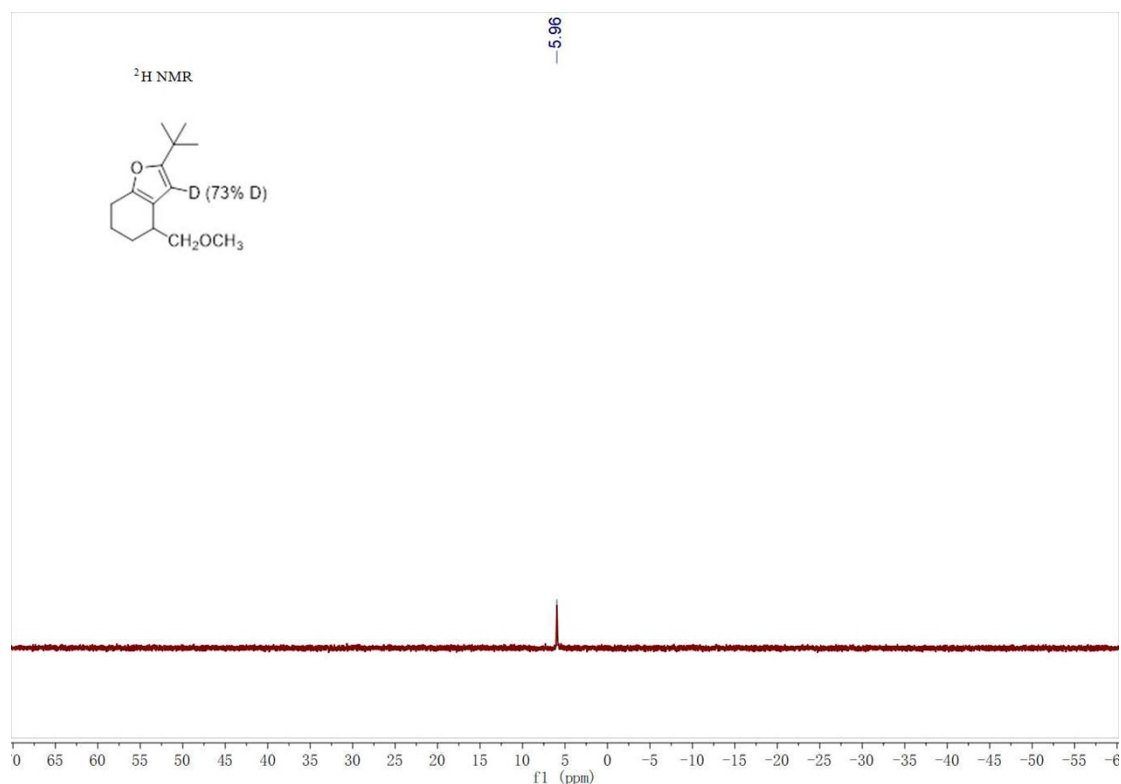

## 6 Dehydrogenation of furan product

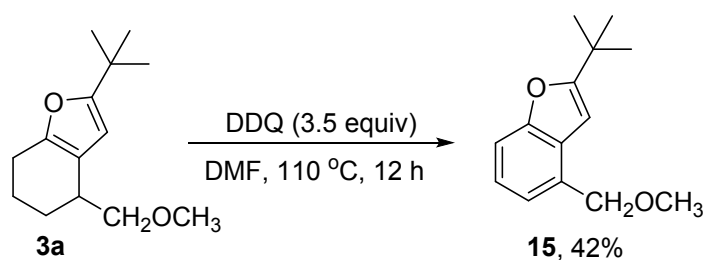

To an oven dried transparent 10 mL Schlenk tube equipped with stirring bar, 2-(tert-butyl)-4-(methoxymethyl)-4,5,6,7-tetrahydrobenzofuran **3a** (22.3 mg, 0.1 mmol, 1.0 equiv) was added. The tube was evacuated and filled with nitrogen for 3 times, The tube was then charged with DMF (3.0 mL, 0.033 M) via a syringe under N<sub>2</sub>. Then DDQ (79.5 mg, 0.35 mmol, 3.5 equiv) was added under N<sub>2</sub>. The resulting mixture was stirred at 110 °C for 12 h, After the reaction was complete, the reaction solution was extracted with EtOAc (3 x 5 mL). The organic layer was washed with brine, dried over MgSO<sub>4</sub>, filtered, and solvent was evaporated to obtain crude product. Flash chromatography over silica gel afforded the product **15** (eluent = petroleum ether

/ethyl acetate 100:1 v/v).

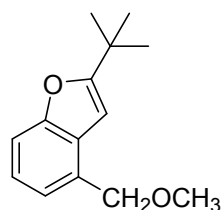

**2-(tert-butyl)-4-(methoxymethyl)benzofuran (15).** The product **15** was obtained in 42% (9.2 mg) yield as a colorless oil after column chromatography.  $^1\text{H}$  NMR (400 MHz,  $\text{CDCl}_3$ )  $\delta$  7.36 (d,  $J = 7.9$  Hz, 1H), 7.21-7.07 (m, 2H), 6.46 (s, 1H), 4.65 (s, 2H), 3.40 (s, 3H), 1.37 (s, 9H).  $^{13}\text{C}$  NMR (125 MHz,  $\text{CDCl}_3$ )  $\delta$  167.5, 154.7, 130.1, 127.9, 122.8, 121.8, 110.4, 97.5, 73.0, 58.1, 33.0, 28.8. HRMS (ESI)  $[\text{M}+\text{H}]^+$ : calculated for  $\text{C}_{14}\text{H}_{19}\text{O}_2$ : 219.1380, found 219.1379.

## 7 Reference

1. (a) M. S. Oderinde and J. W. Johannes, *Org. Synth.*, 2017, **94**, 77-92; (b) J. Luo and J. Zhang, *ACS Catal.*, 2016, **6**, 873-877; (c) D. M. Schultz, J. W. Sawicki and T. P. Yoon, *Beilstein J. Org. Chem.*, 2015, **11**, 61-65.
2. (a) Y. Liu, W. Luo, J. Wu, Y. Fang, Y. Li, X. Jin, L. Zhang, Z. Zhang, F. Xu and C. Du, *Org. Chem. Front.*, 2020, **7**, 1588-1592; (b) T. Guo, L. Zhang, X. Liu, Y. Fang, X. Jin, Y. Yang, Y. Li, B. Chen and M. Ouyang, *Adv. Synth. Catal.*, 2018, **360**, 4459-4463; (c) W. Luo, Y. Yang, Y. Fang, X. Zhang, X. Jin, G. Zhao, L. Zhang, Y. Li, W. Zhou, T. Xia and B. Chen, *Adv. Synth. Catal.*, 2019, **361**, 4215-4221; (d) W. Luo, Y. Fang, L. Zhang, T. Xu, Y. Liu, Y. Li, X. Jin, J. Bao, X. Wu and Z. Zhang, *Eur. J. Org. Chem.*, 2020, 1778-1781.
3. (a) J. L. Schwarz, H.-M. Huang, T. O. Paulisch and F. Glorius, *ACS Catal.*, 2020, **10**, 1621-1627; (b) G. Goti, B. Bieszczad, A. Vega-Peñaloza and P. Melchiorre, *Angew. Chem. Int. Ed.*, 2019, **58**, 1213-1217; (c) N. Alandini, L. Buzzetti, G. Favi, T. Schulte, L. Candish, K. D. Collins and P. Melchiorre, *Angew. Chem. Int. Ed.*, 2020, **59**, 5248-5253.
4. Z. Zhang, V. Smal, P. Retailleau, A. Voituriez, G. Frison, A. Marinetti and X. Guinchard, *J. Am. Chem. Soc.*, 2020, **142**, 3797-3805.
5. H. H. Kong, H. L. Pan and M. W. Ding, *J. Org. Chem.*, 2018, **83**, 12921-12930.
6. S. Sugita, N. Takeda, N. Tohnai, M. Miyata, O. Miyata and M. Ueda, *Angew. Chem. Int. Ed.*, 2017, **56**, 2469-2472.
7. V. Rauniyar, Z. J. Wang, H. E. Burks and F. D. Toste, *J. Am. Chem. Soc.*, 2011, **133**, 8486-8489.
8. S. M. Wilkerson-Hill, D. Yu, P. P. Painter, E. L. Fisher, D. J. Tantillo, R. Sarpong and J. E. Hein, *J. Am. Chem. Soc.*, 2017, **139**, 10569-10577.

- 
9. Z. Li, J. Peng, C. He, J. Xu and H. Ren, *Org. Lett.*, 2020, **22**, 5768-5772.
  10. Z. Zhang, V. Smal, P. Retailleau, A. Voituriez, G. Frison, A. Marinetti and X. Guinchard, *J. Am. Chem. Soc.*, 2020, **142**, 3797-3805.
  11. H. Stefani, K. Gueogjian, F. Singh, J. Pena and M. Amaral, *Synlett*, 2010, 427-432.
  12. P. Scrimin, P. Tecilla and U. Tonellato, *J. Org. Chem.*, 1994, **59**, 18-24.
  13. M. O. Akram, S. Bera and N. T. Patil, *Chem. Commun.*, 2016, **52**, 12306-12309.
  14. H. H. Kong, H. L. Pan and M. W. Ding, *J. Org. Chem.*, 2018, **83**, 12921-12930.
  15. J. Zhang and H.-G. Schmalz, *Angew. Chem. Int. Ed.*, 2006, **45**, 6704-6707.

## **8 NMR spectra of new compounds**

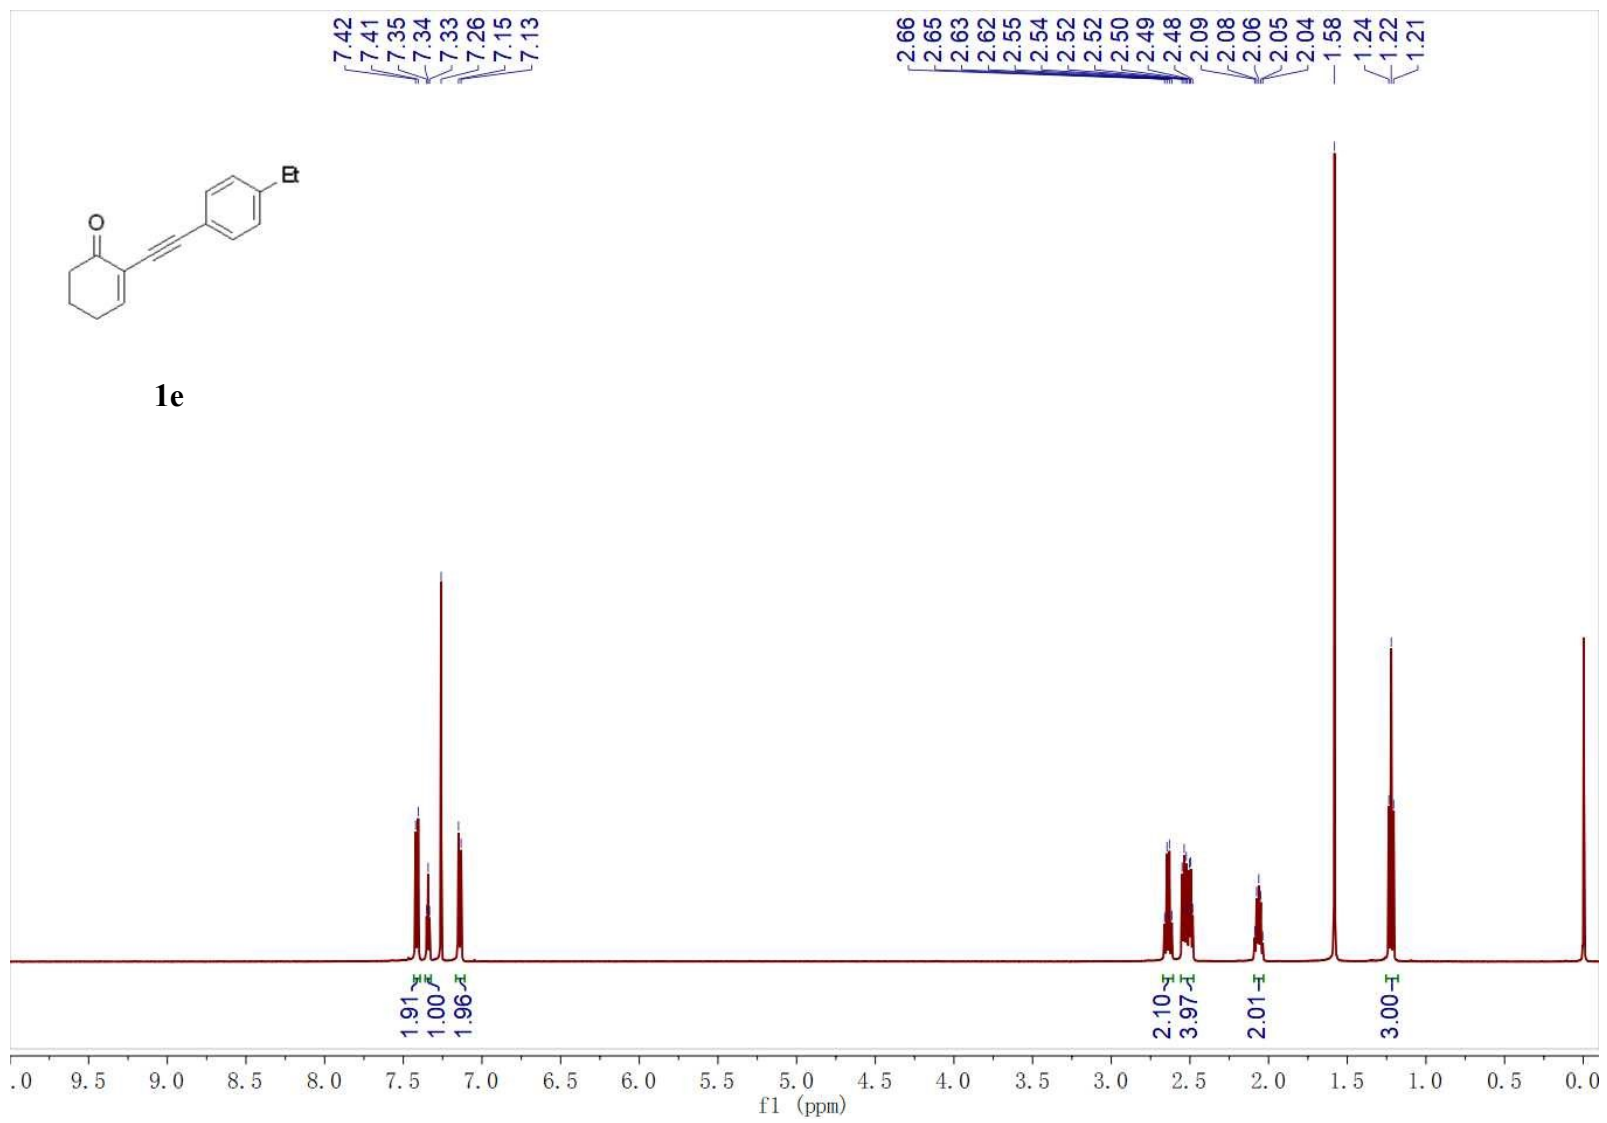

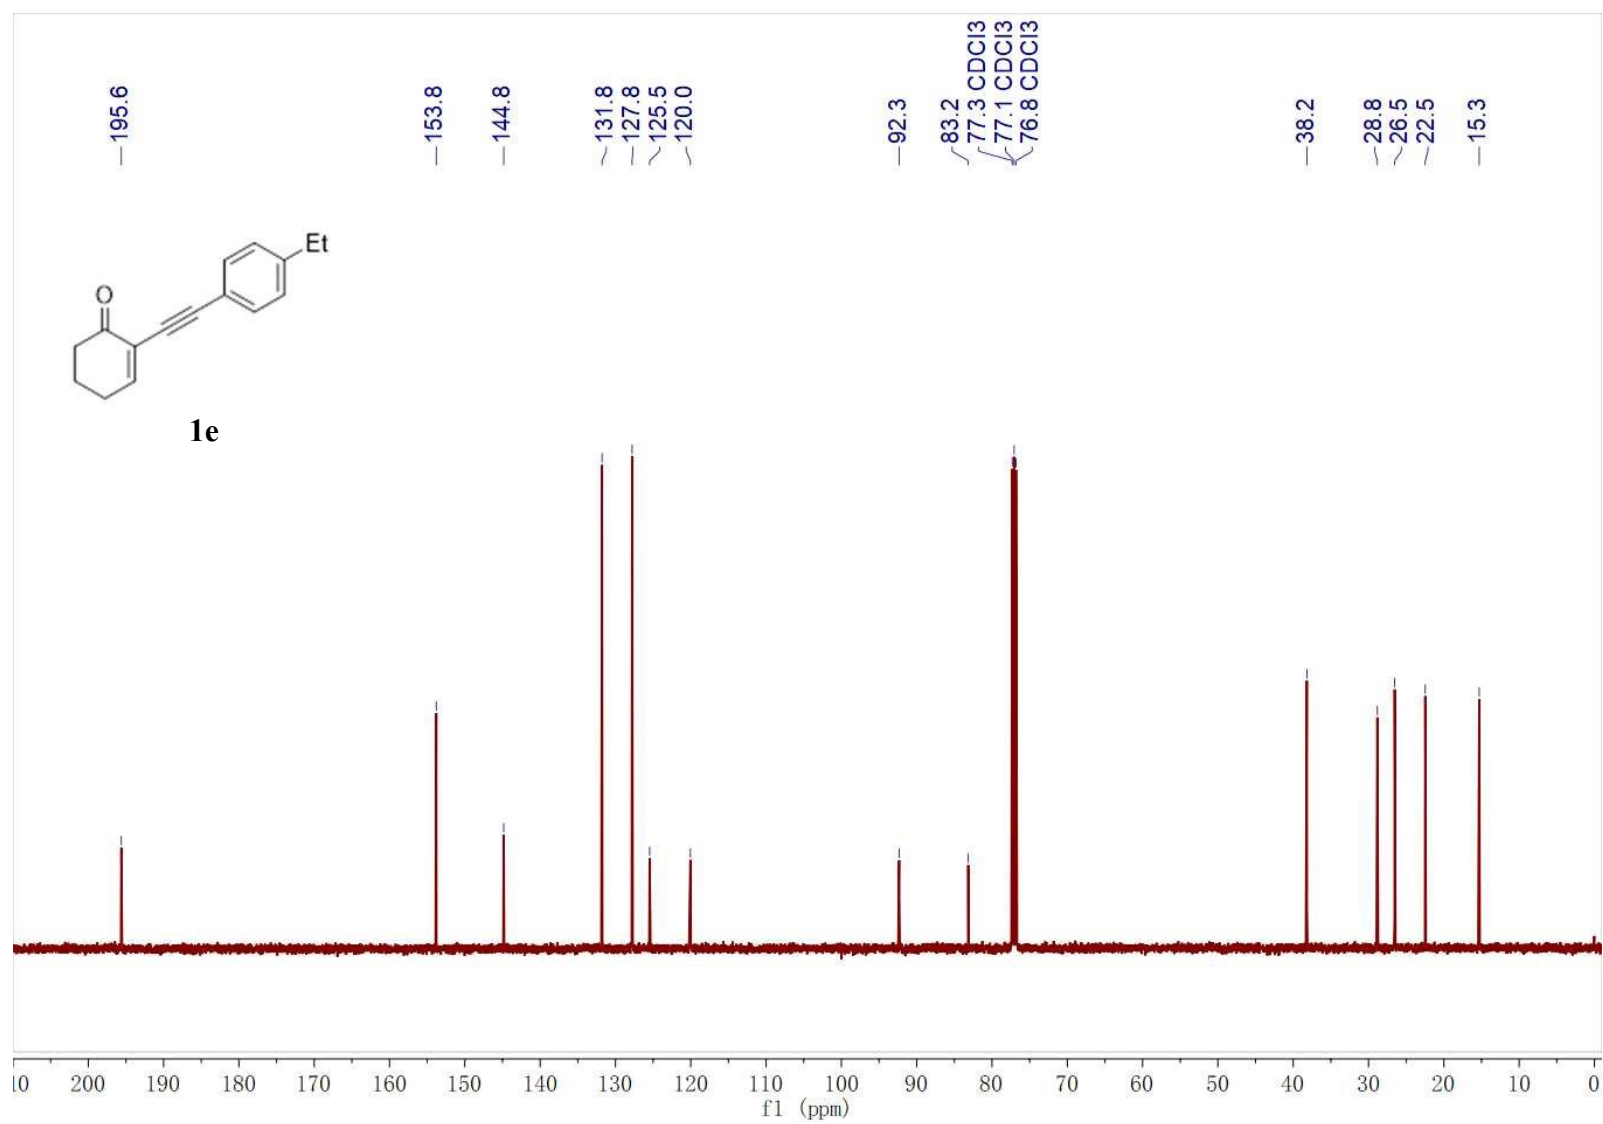

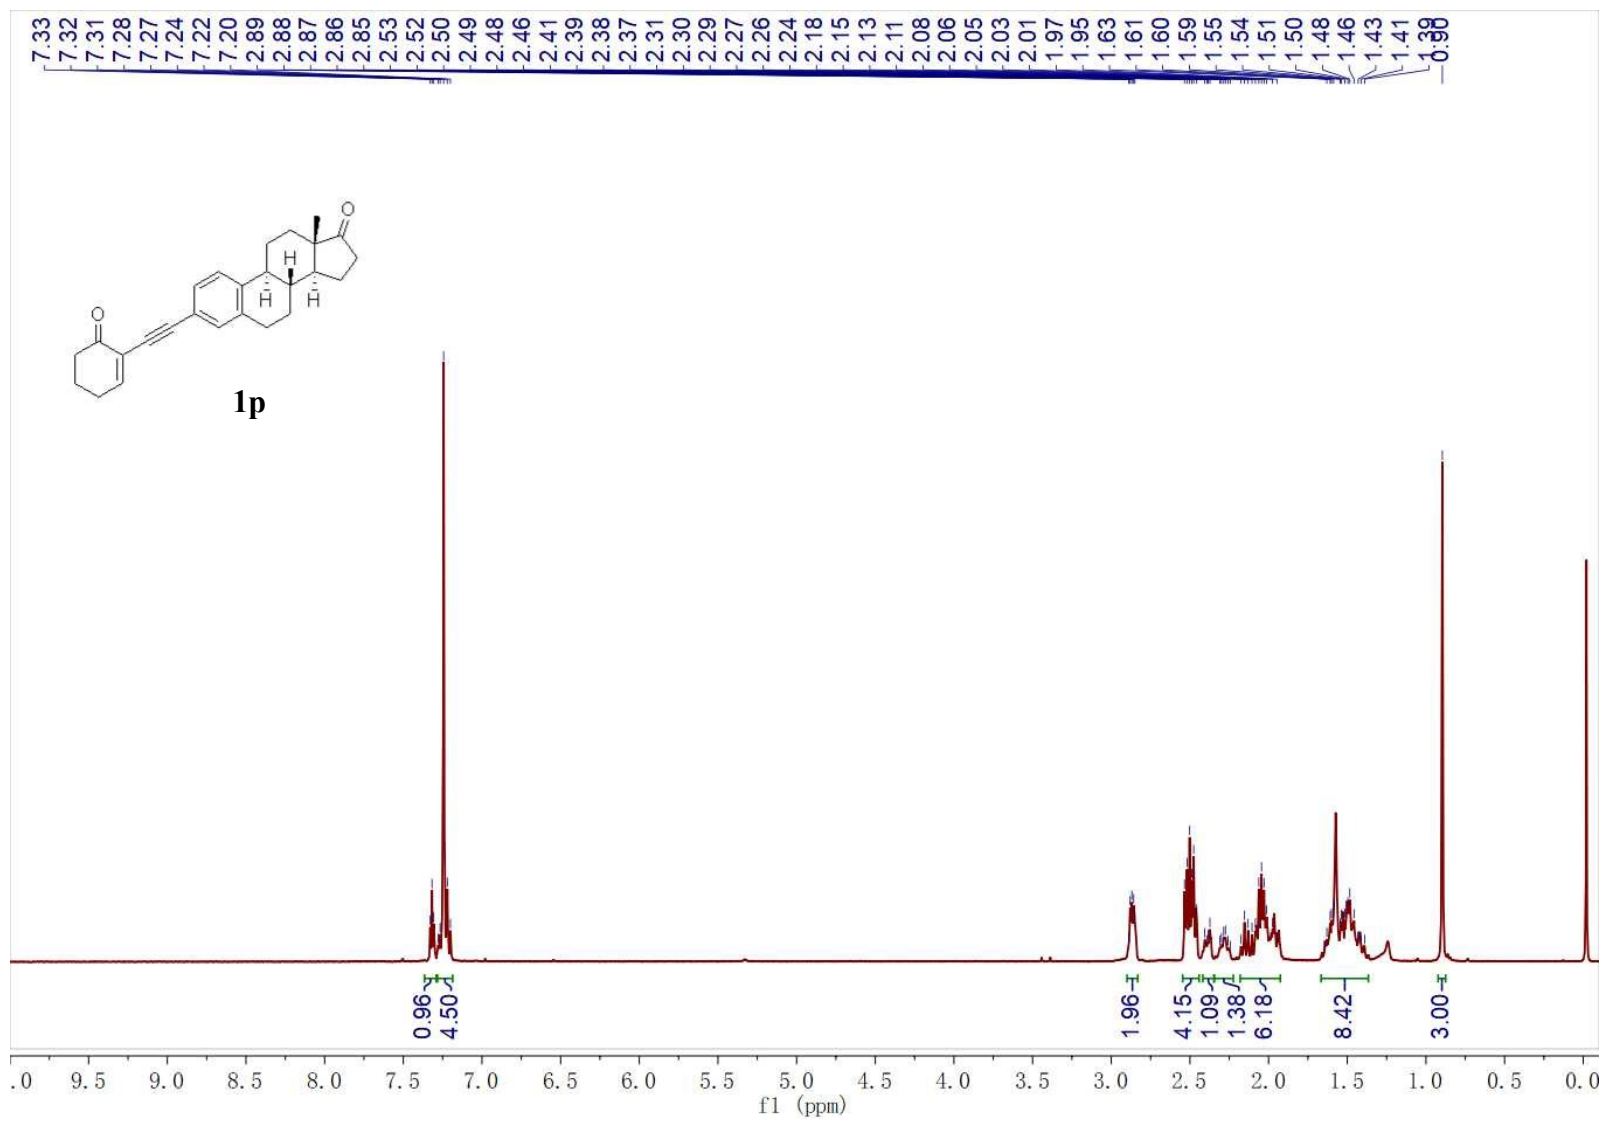

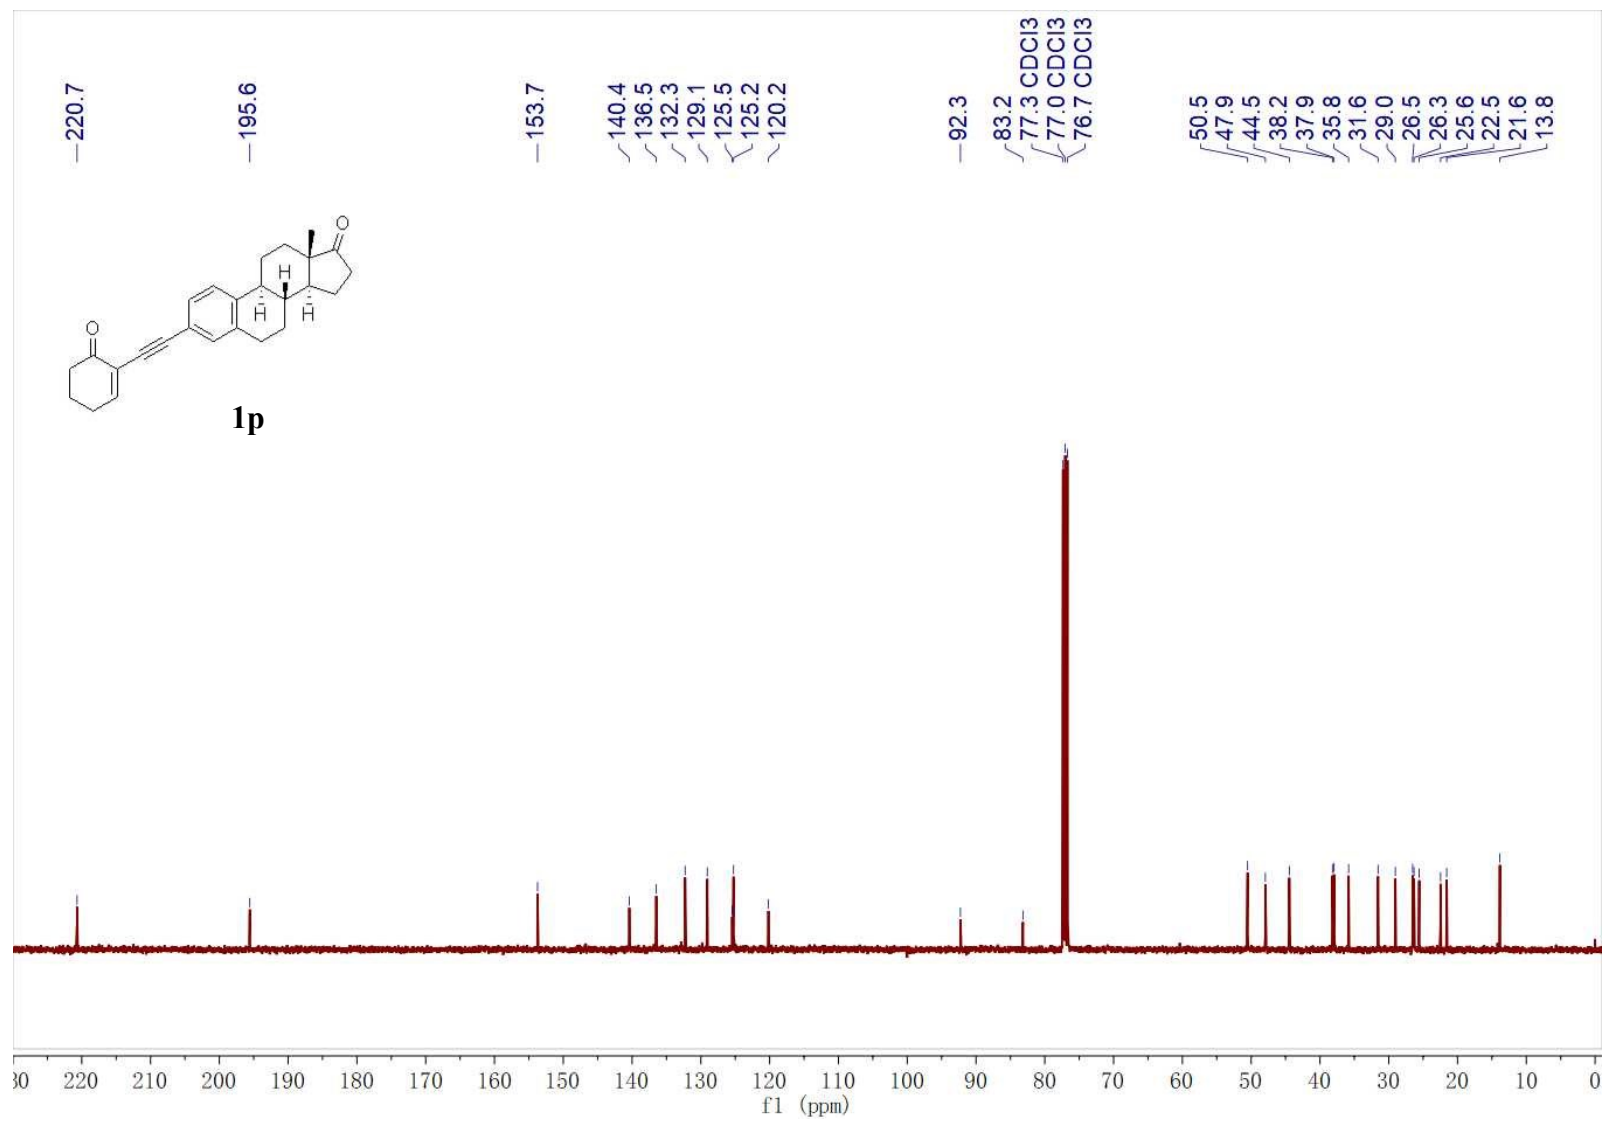



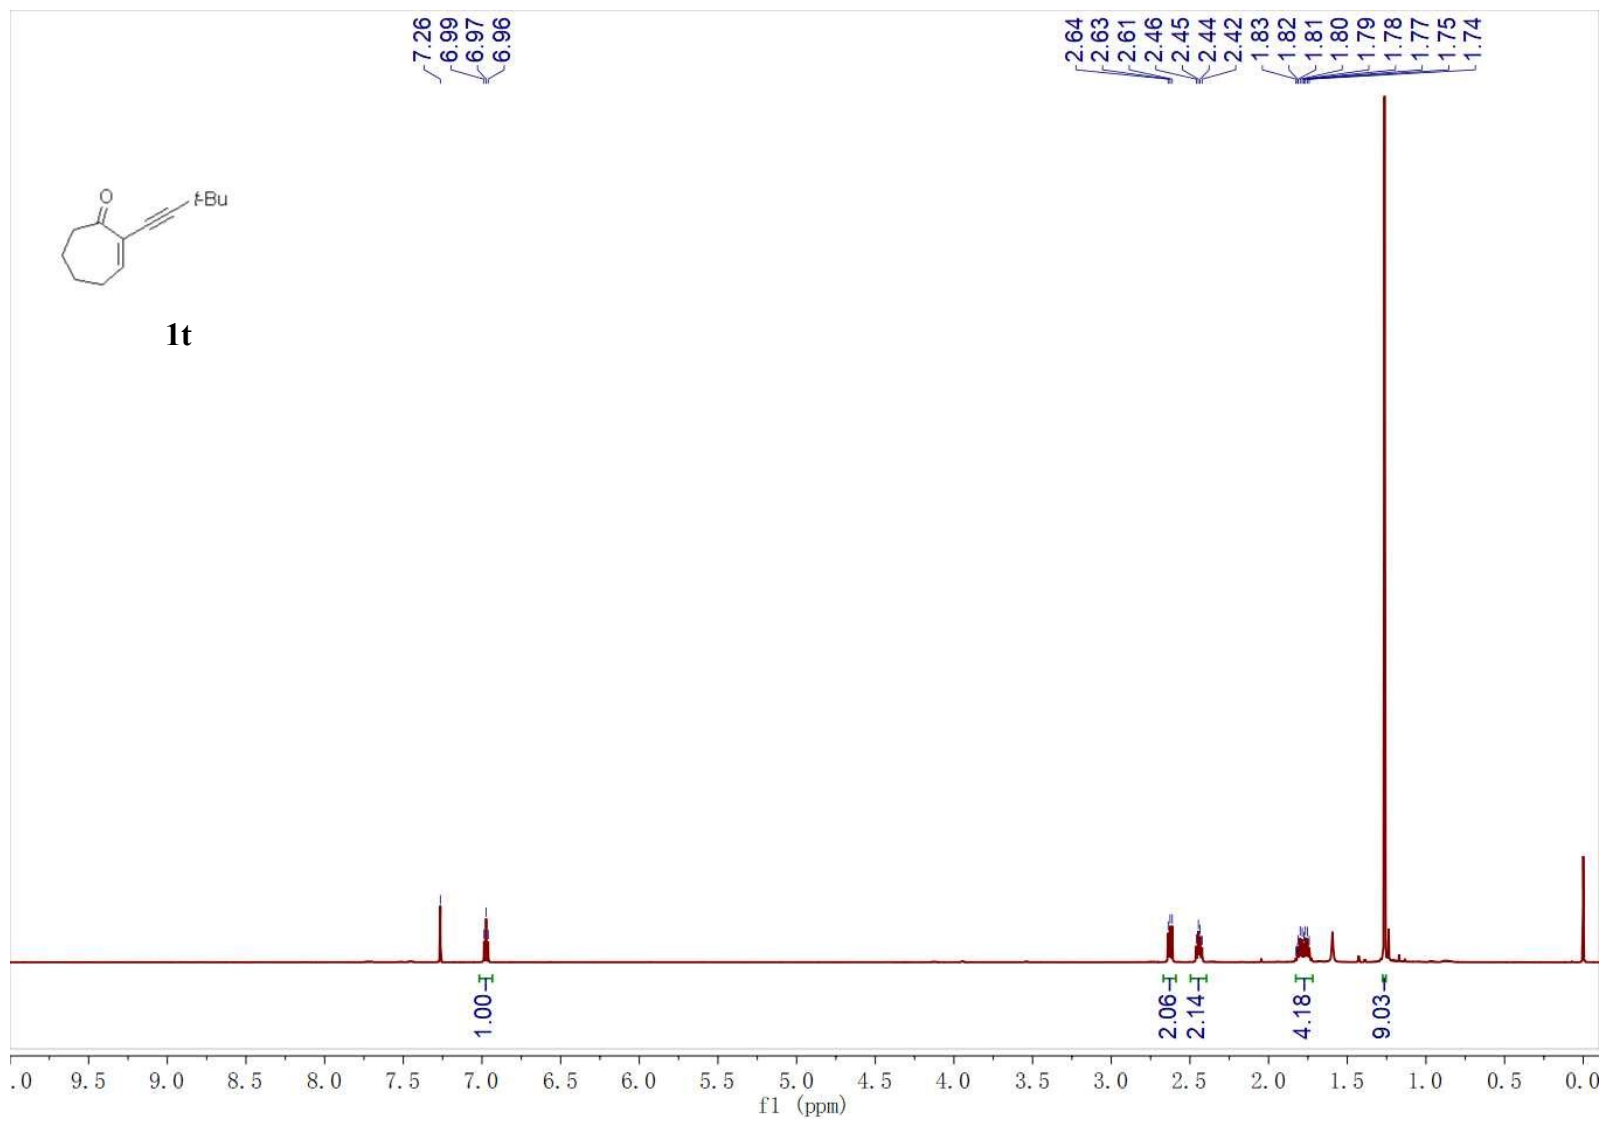

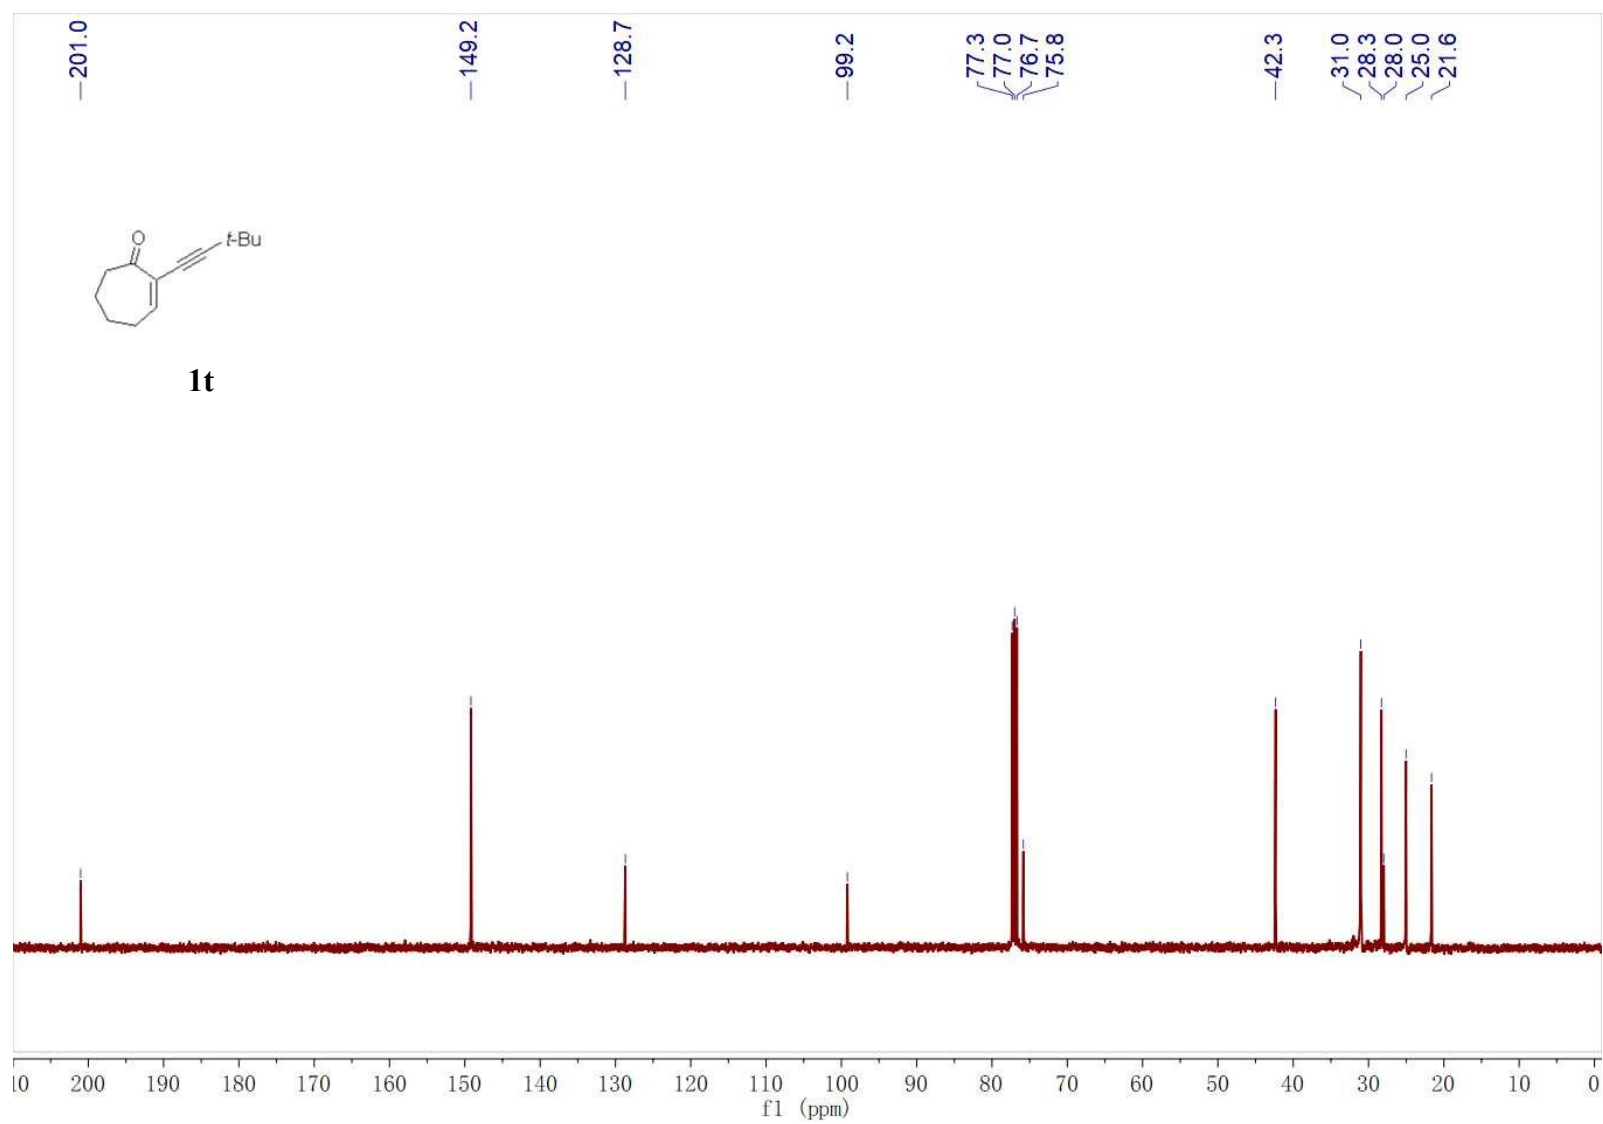

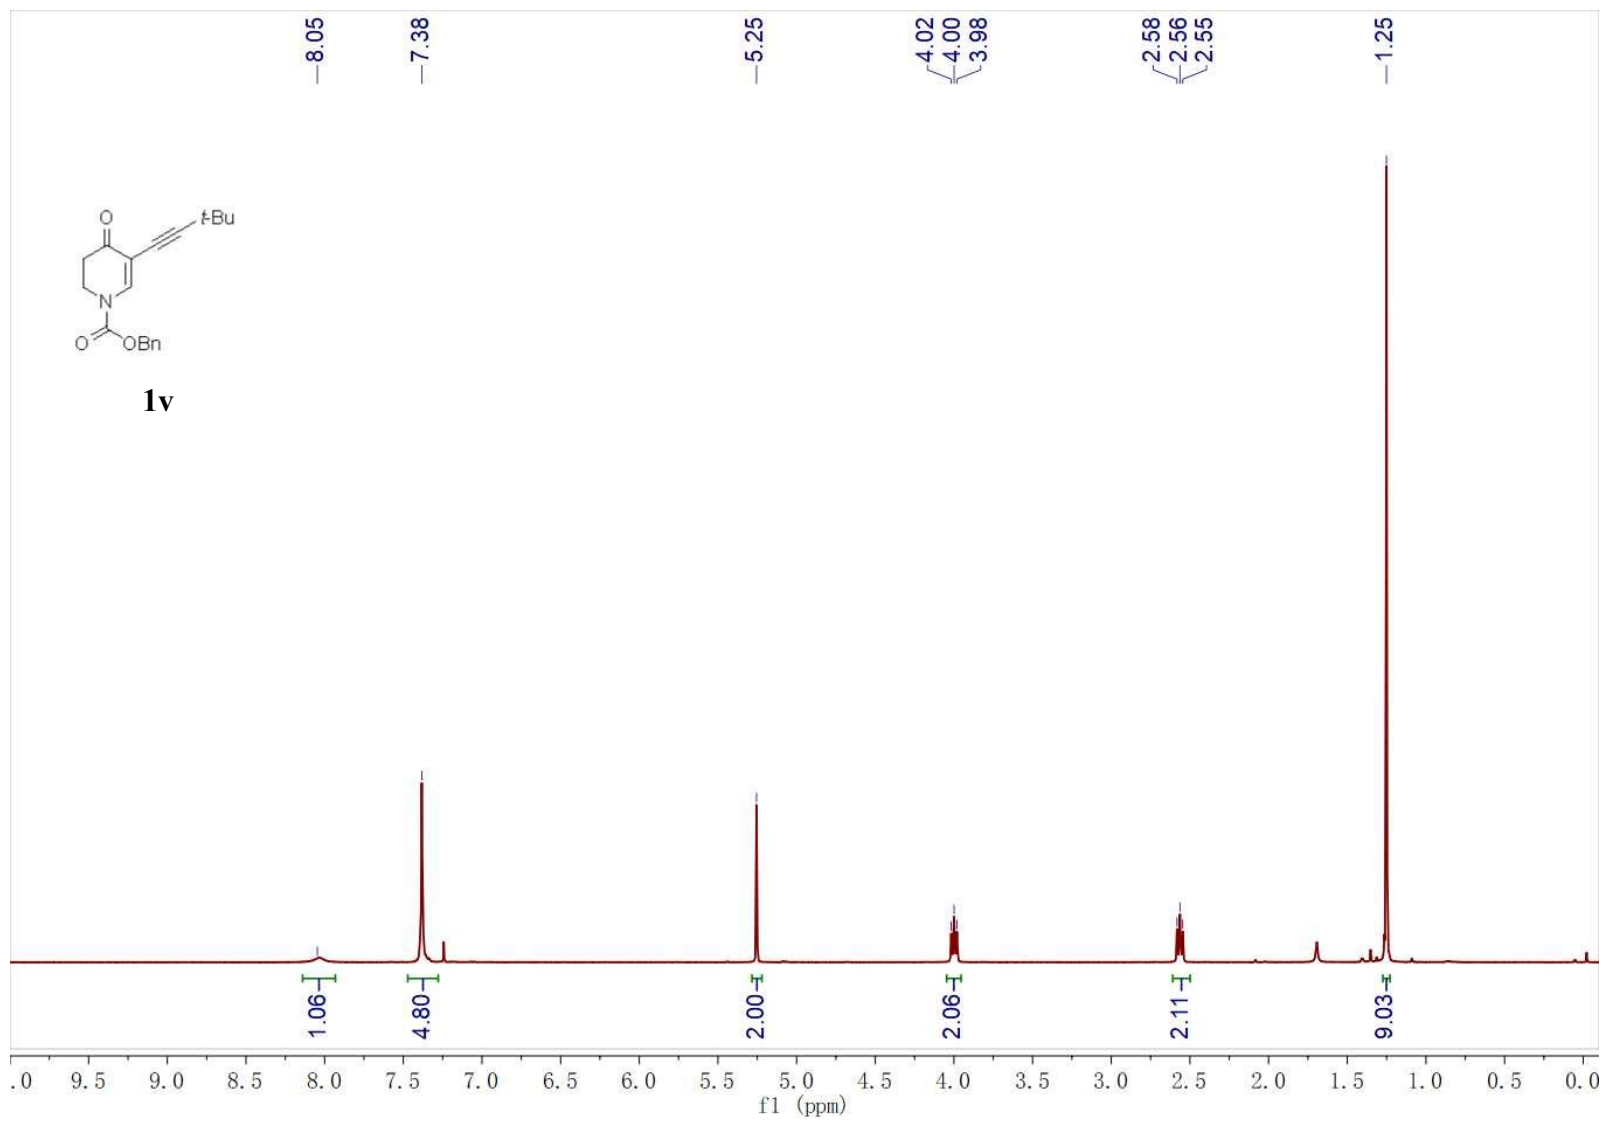

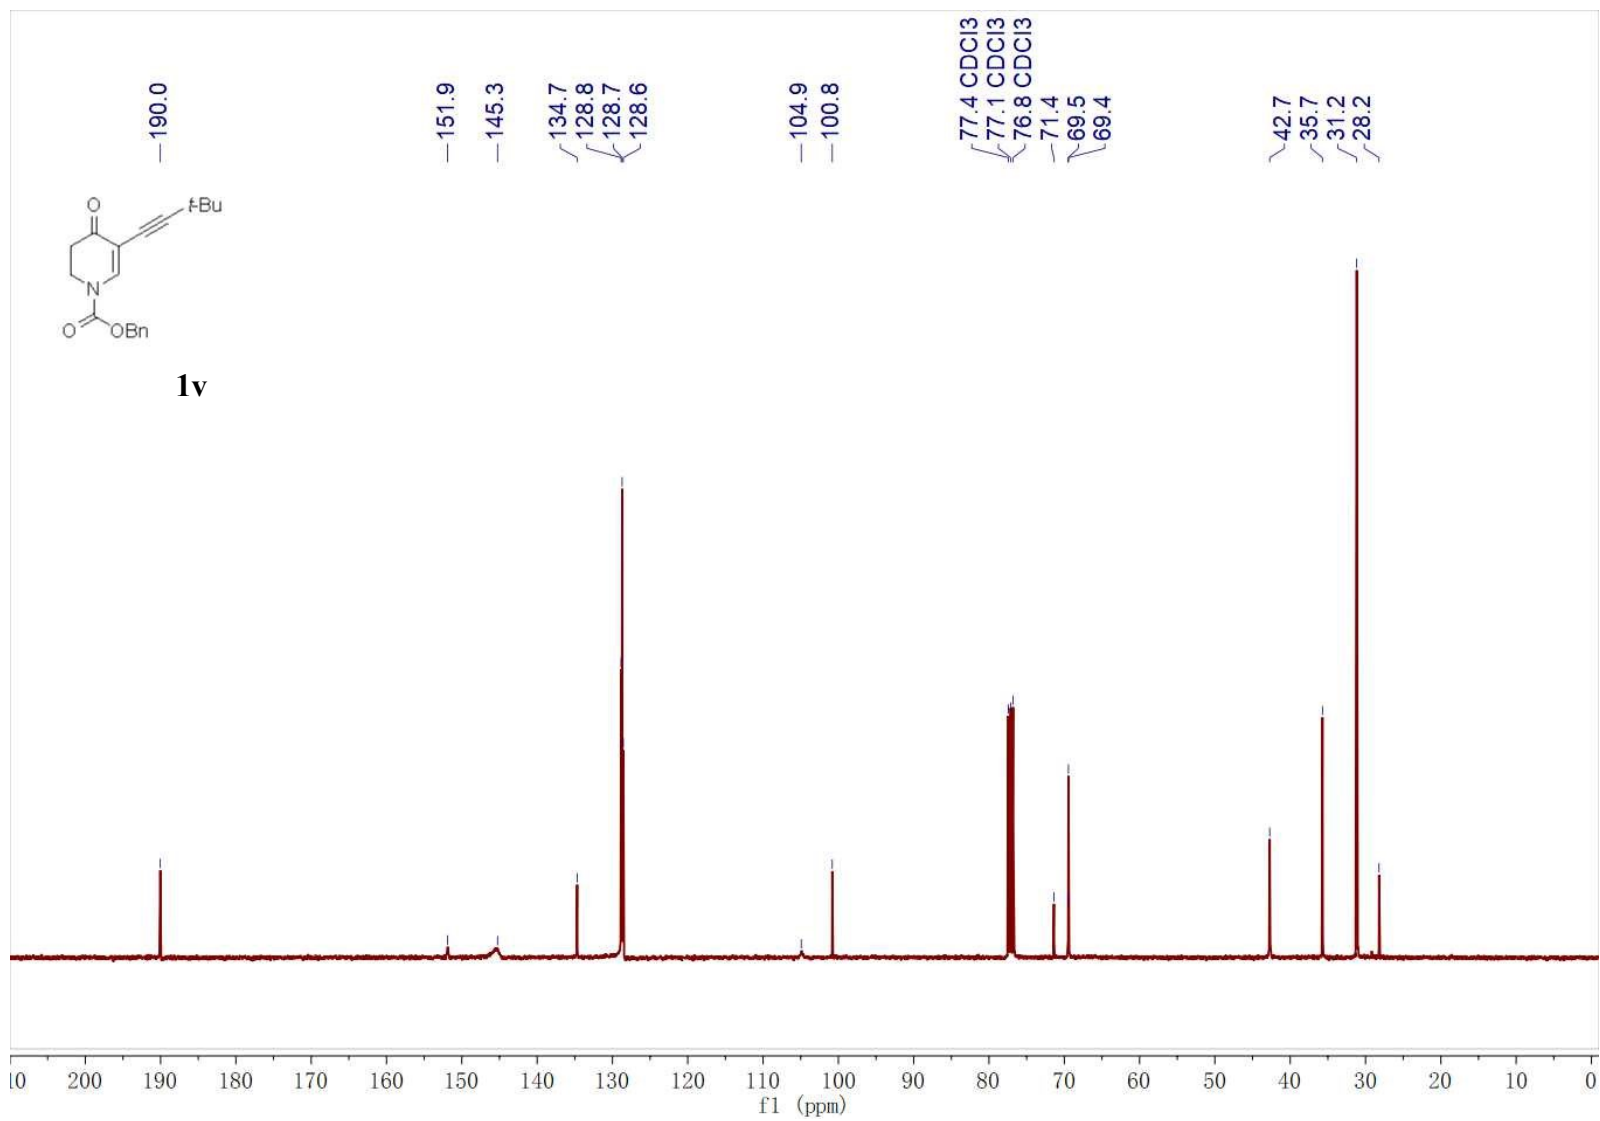

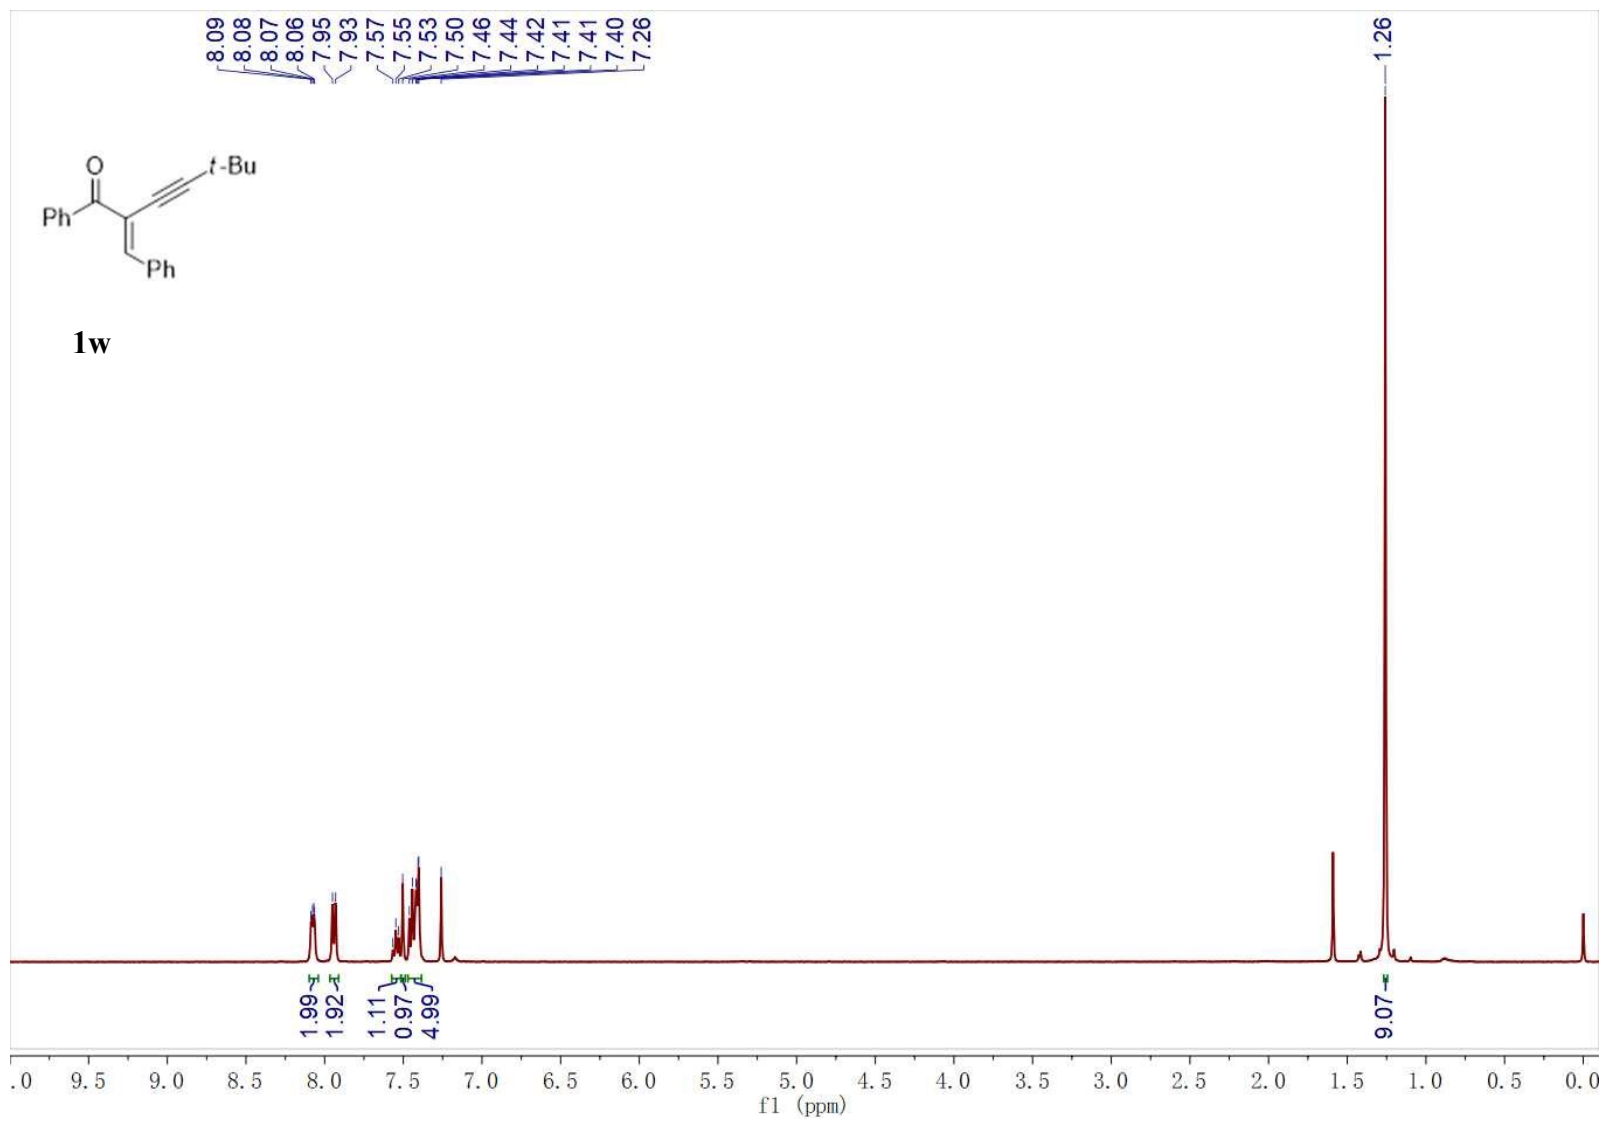

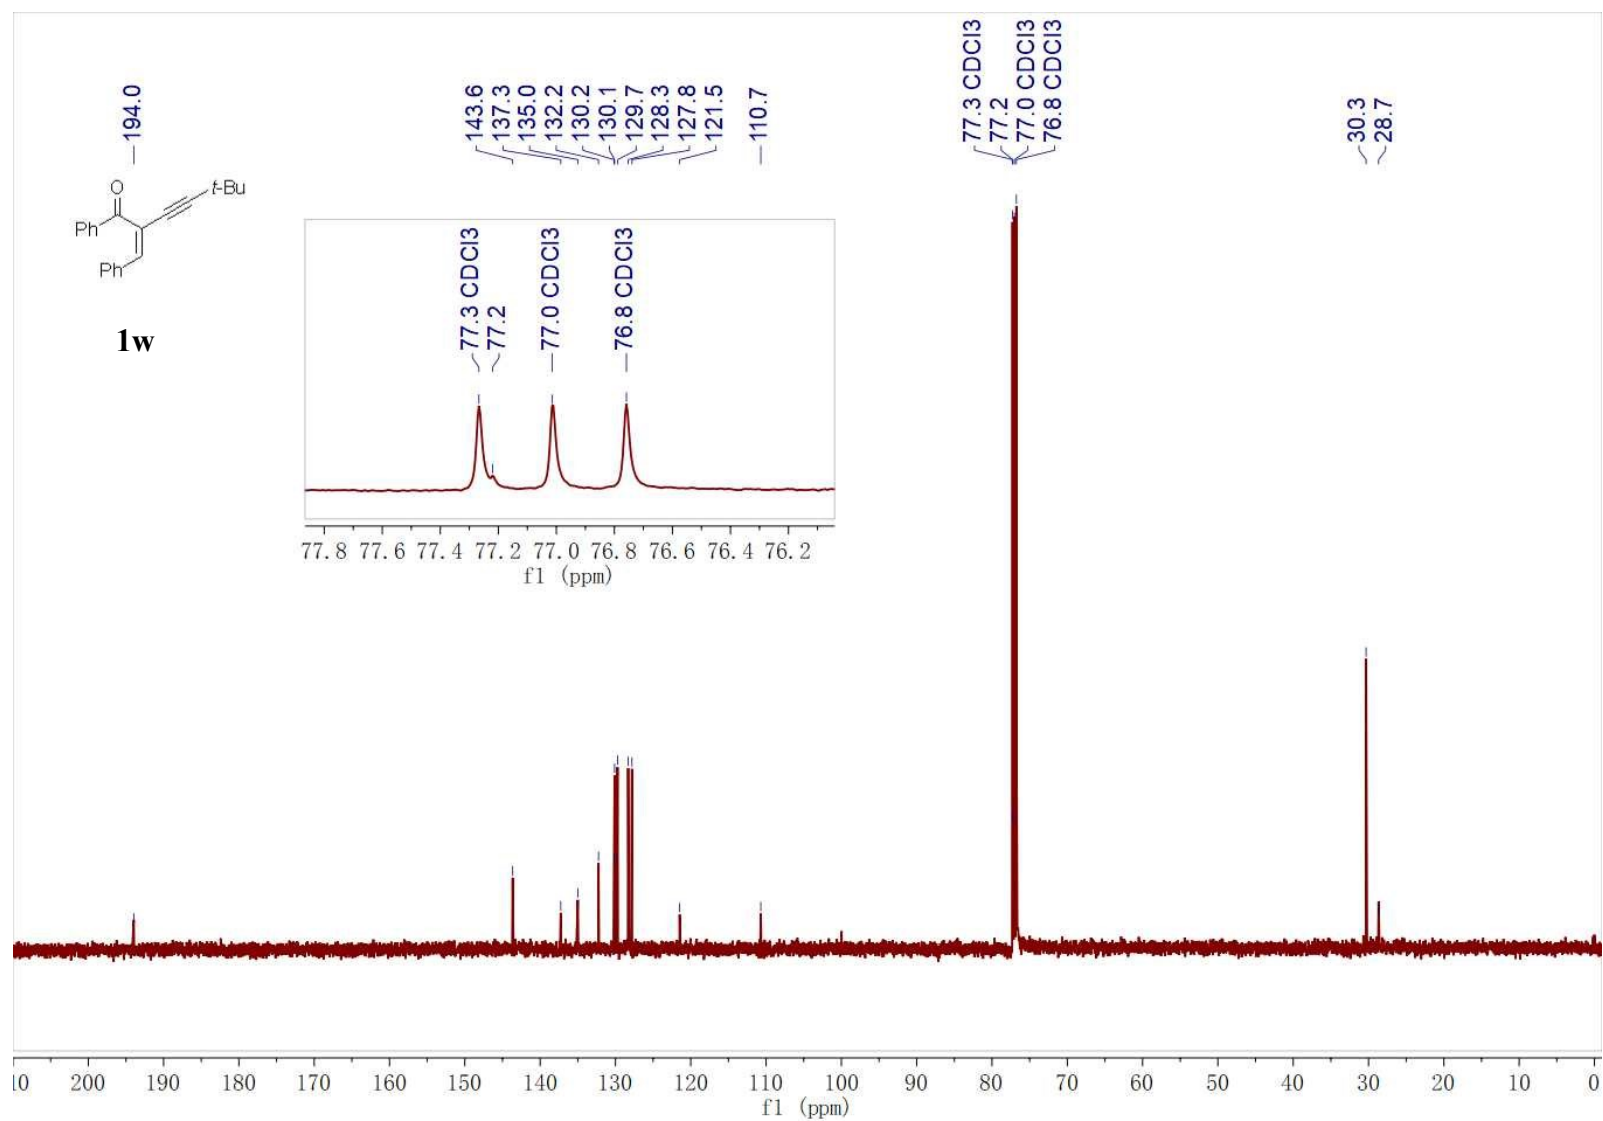

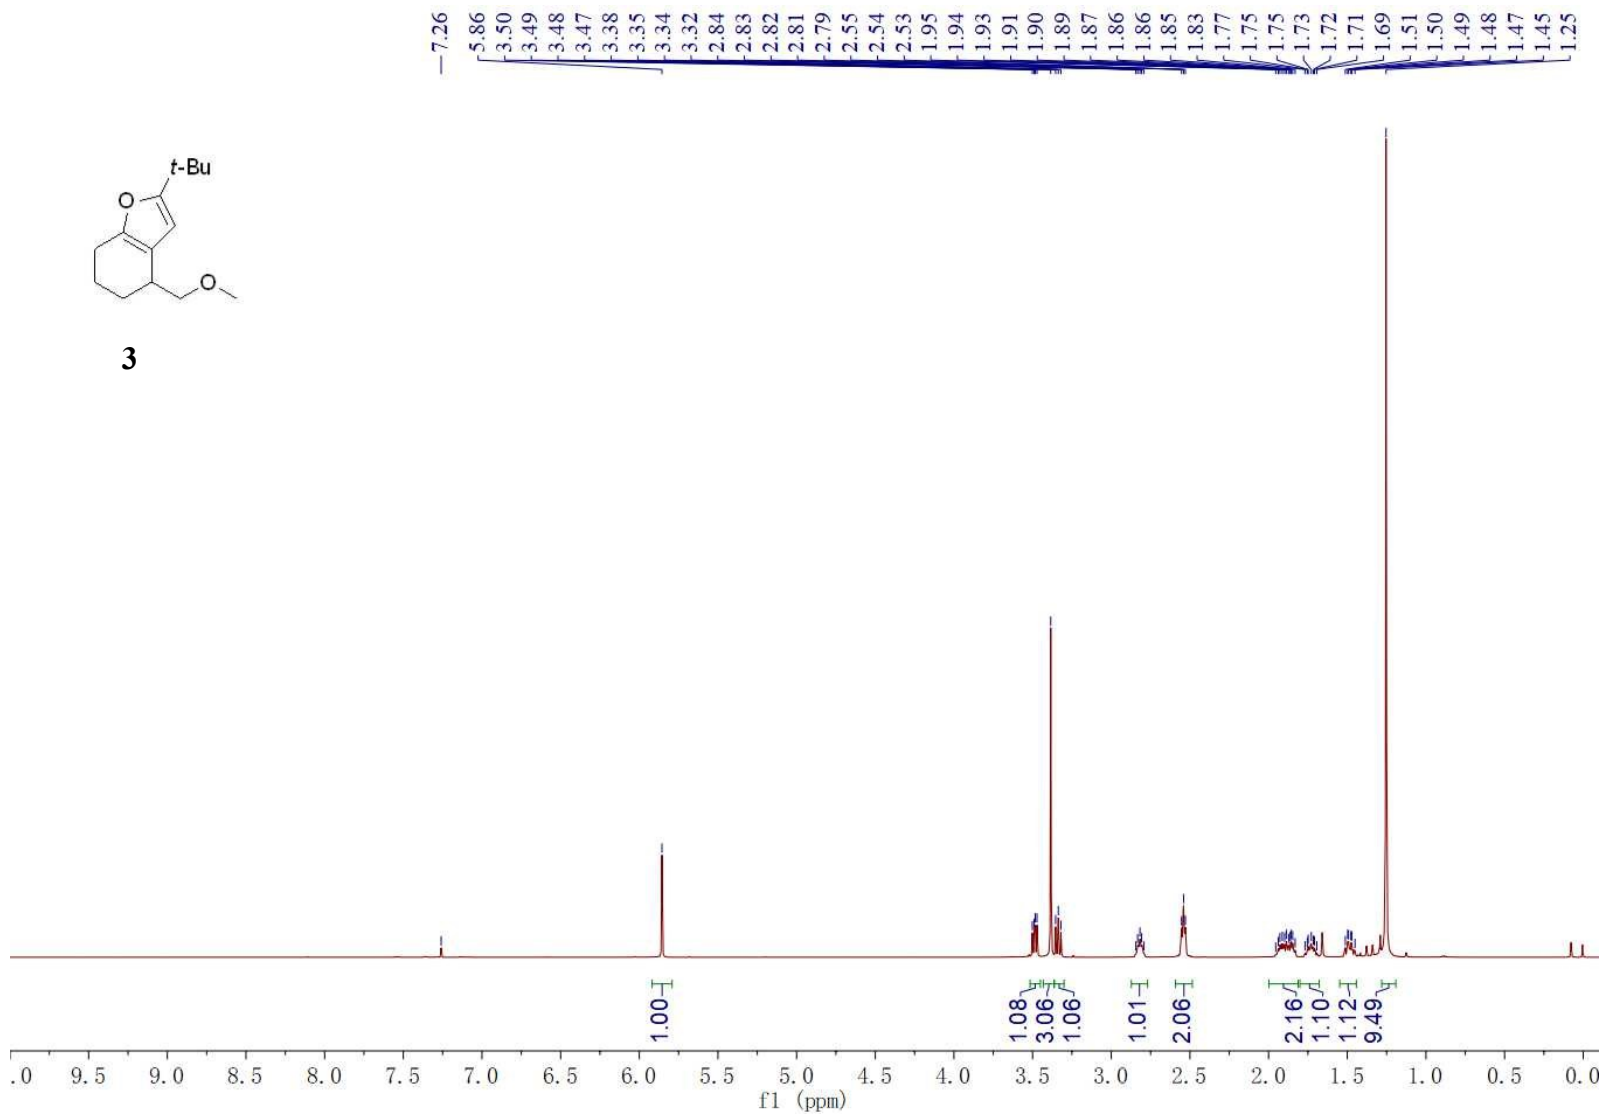

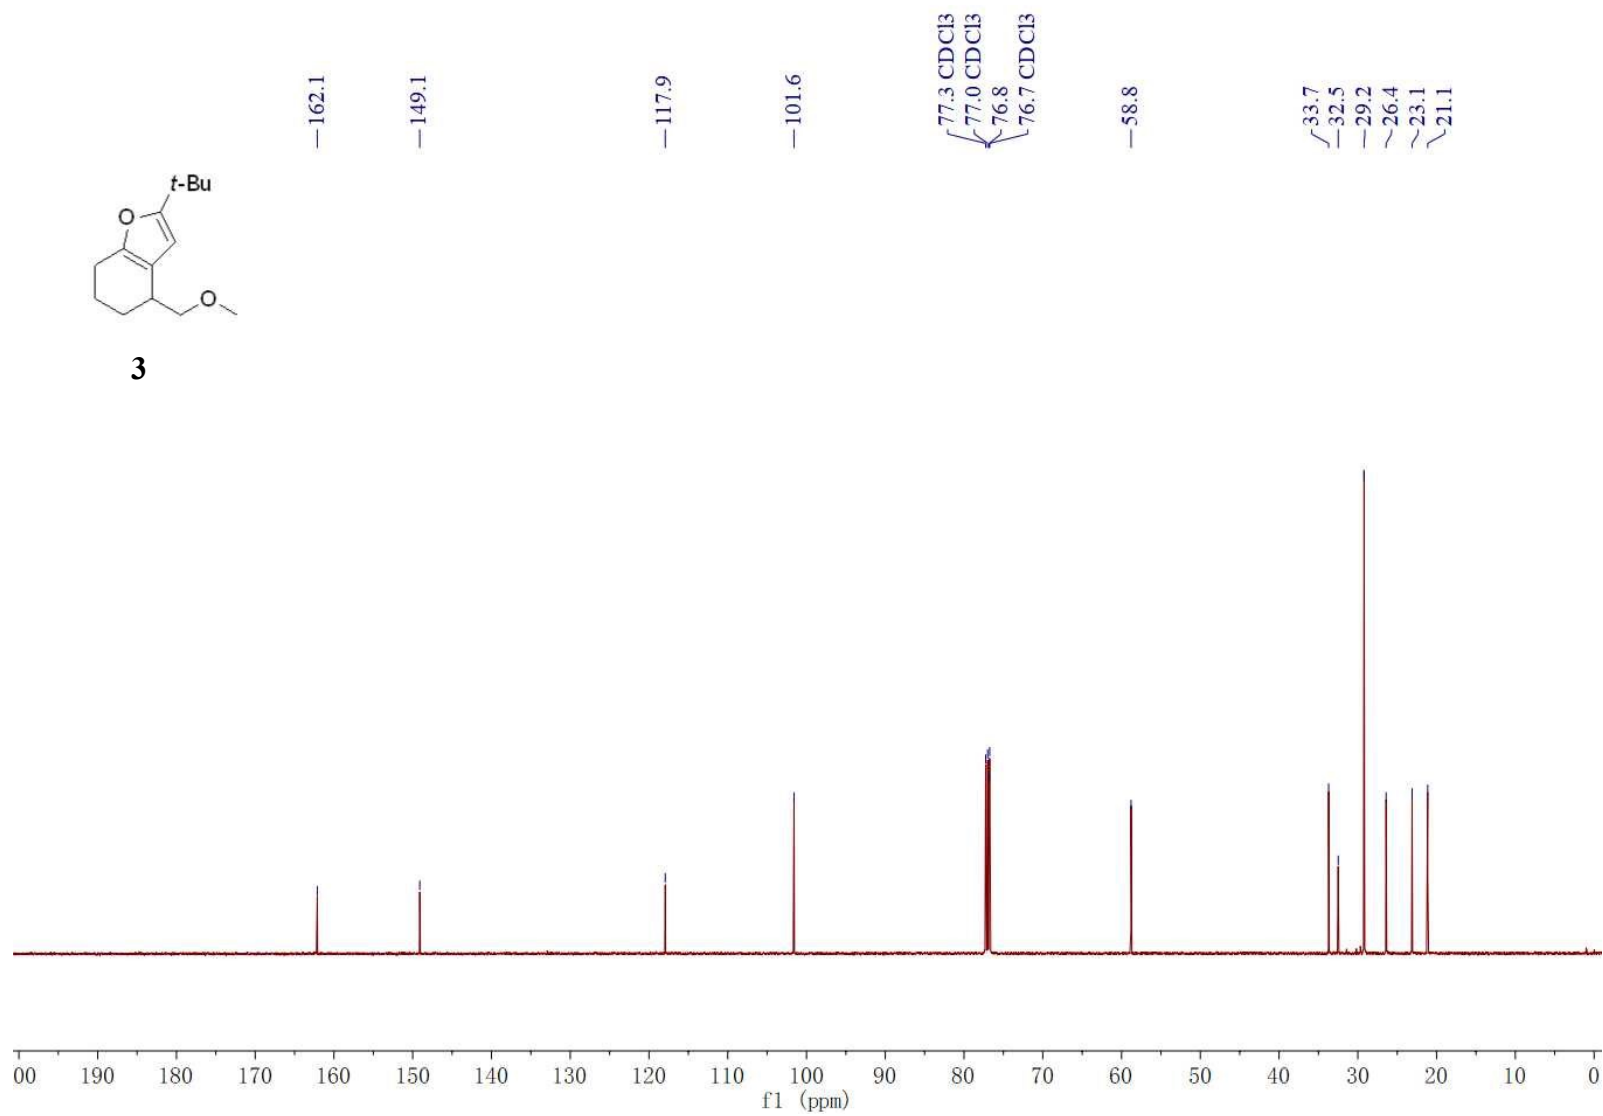



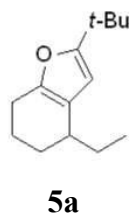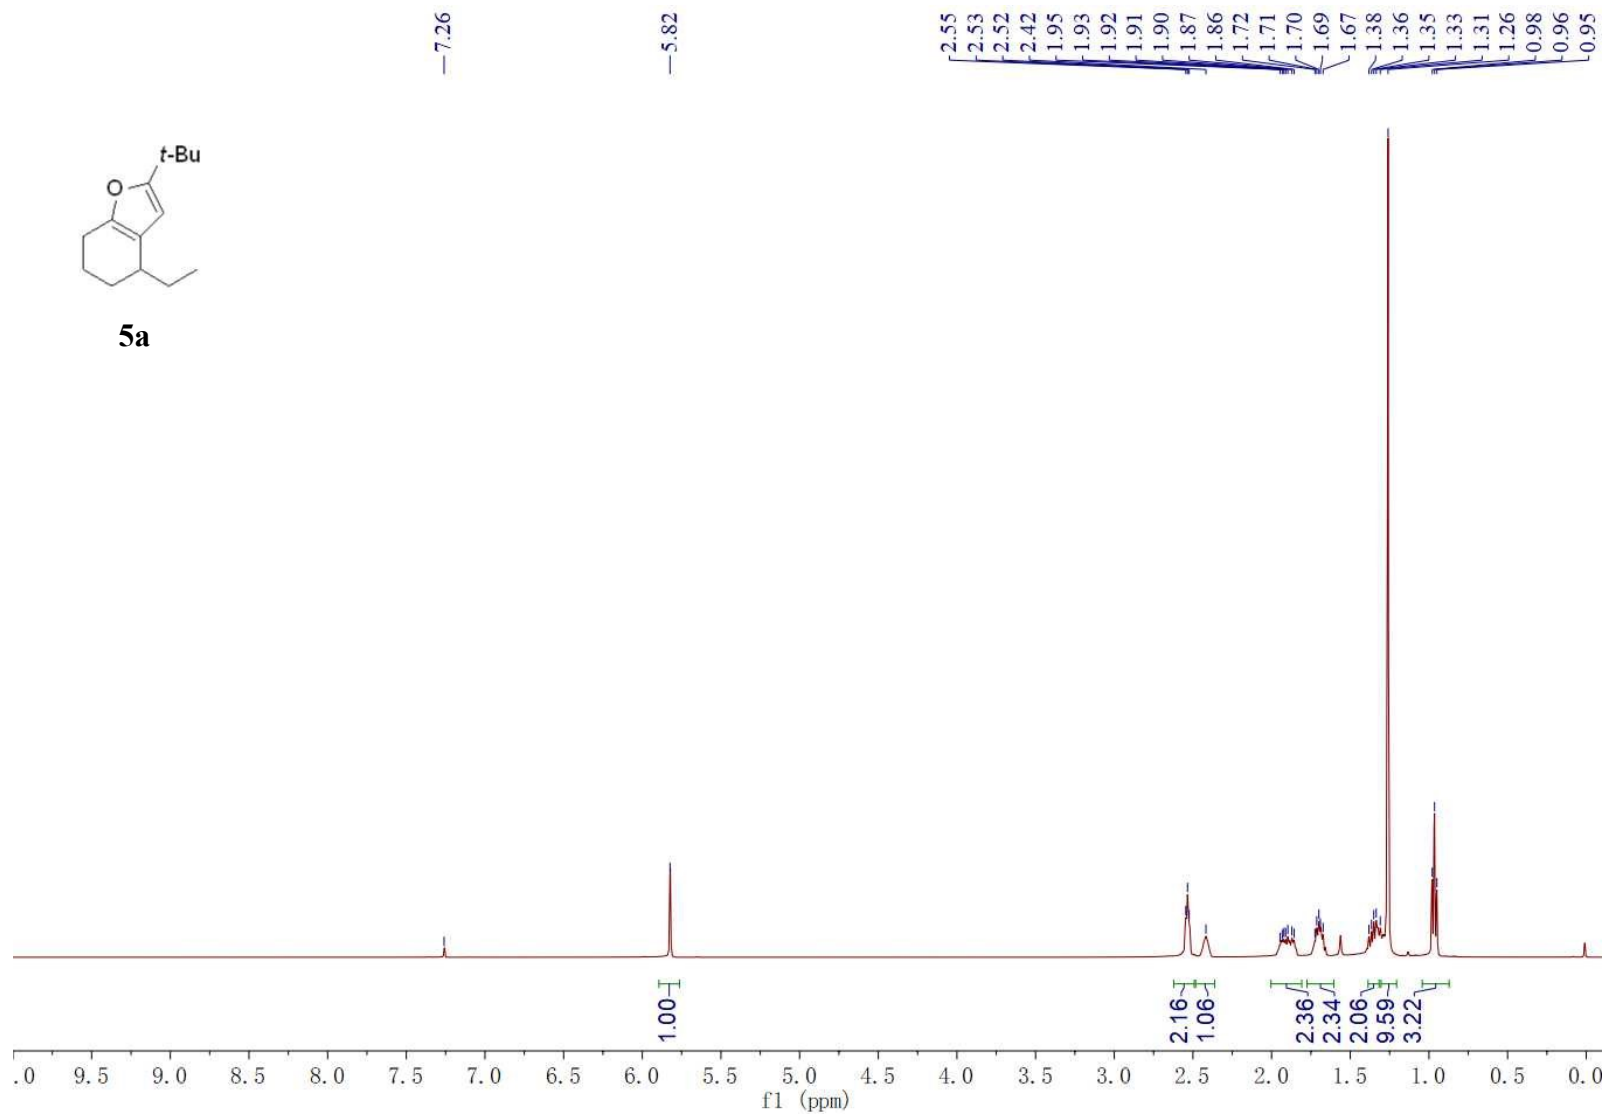

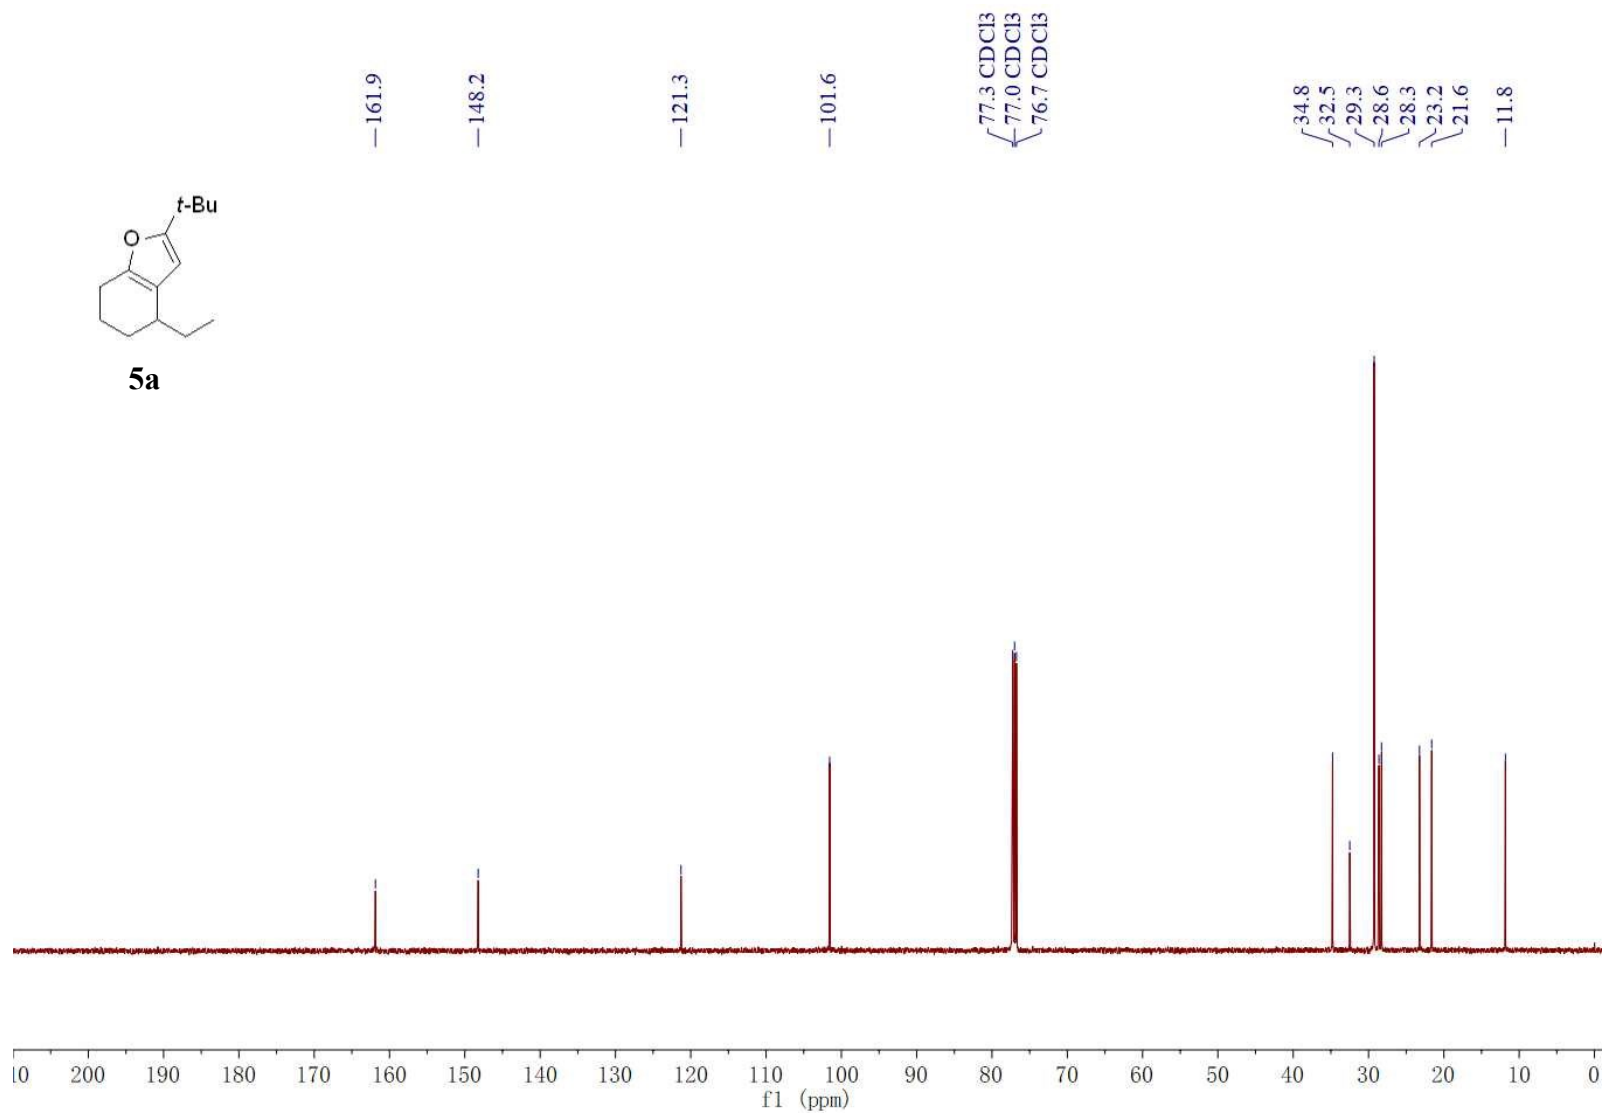

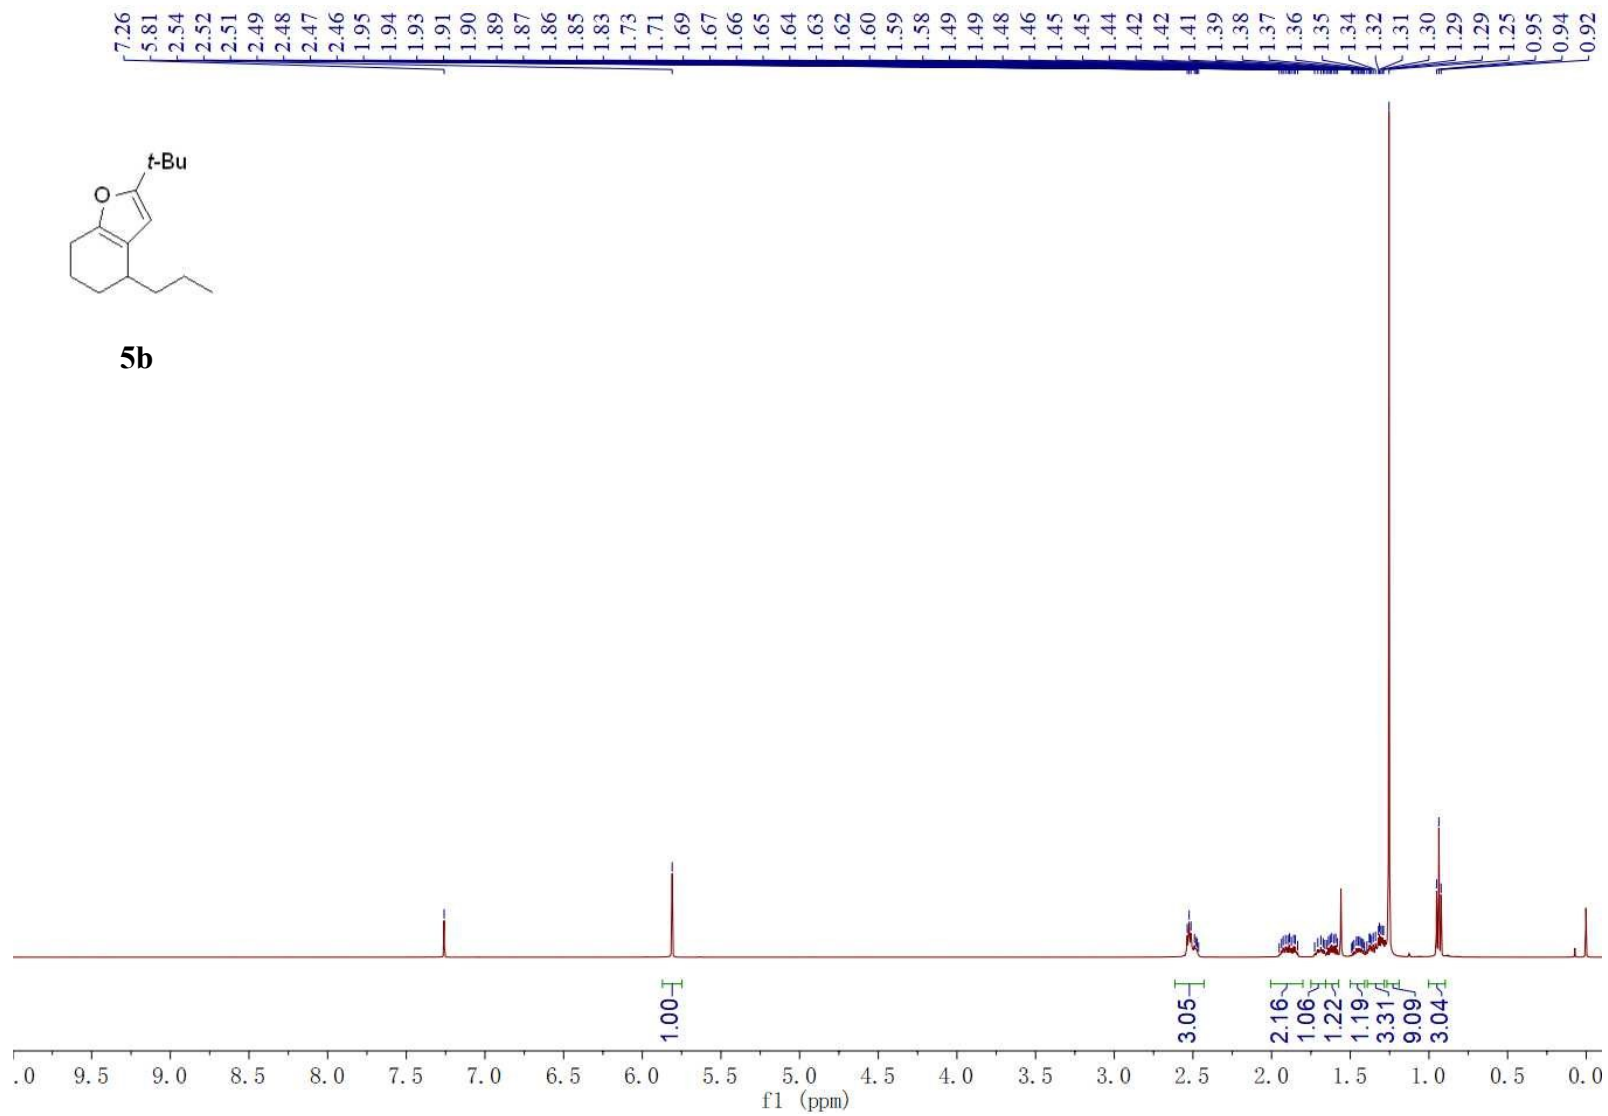

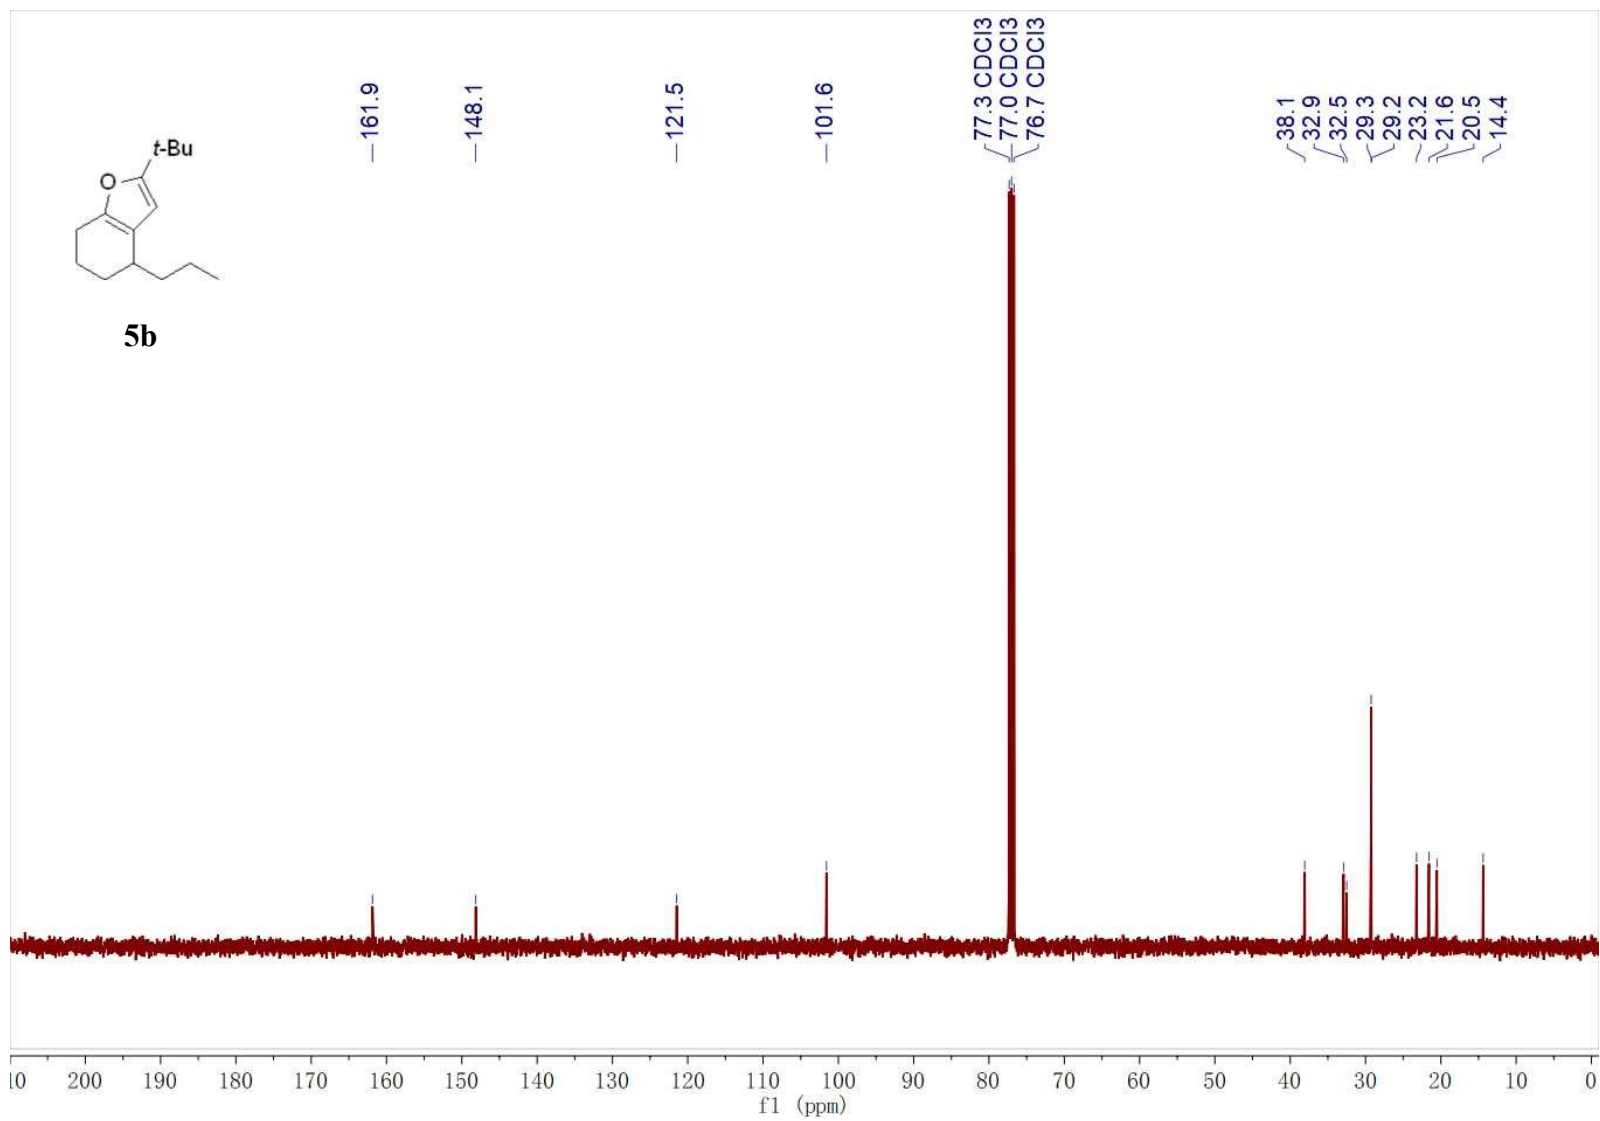

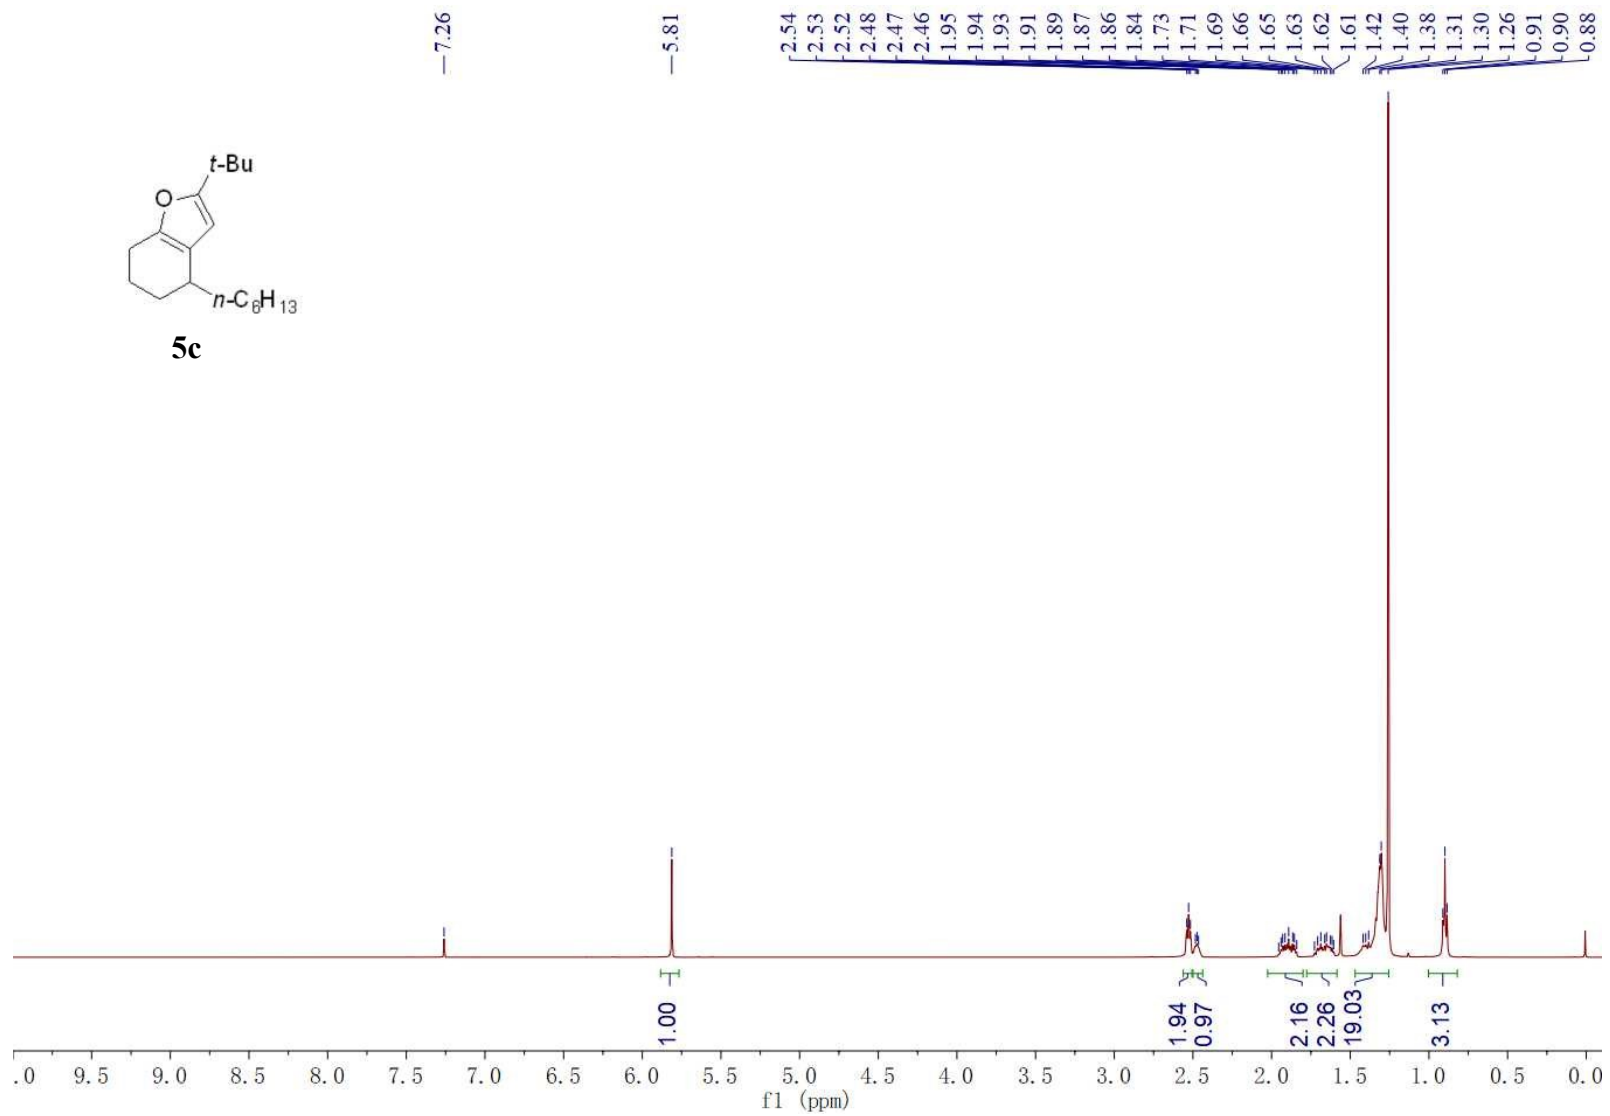

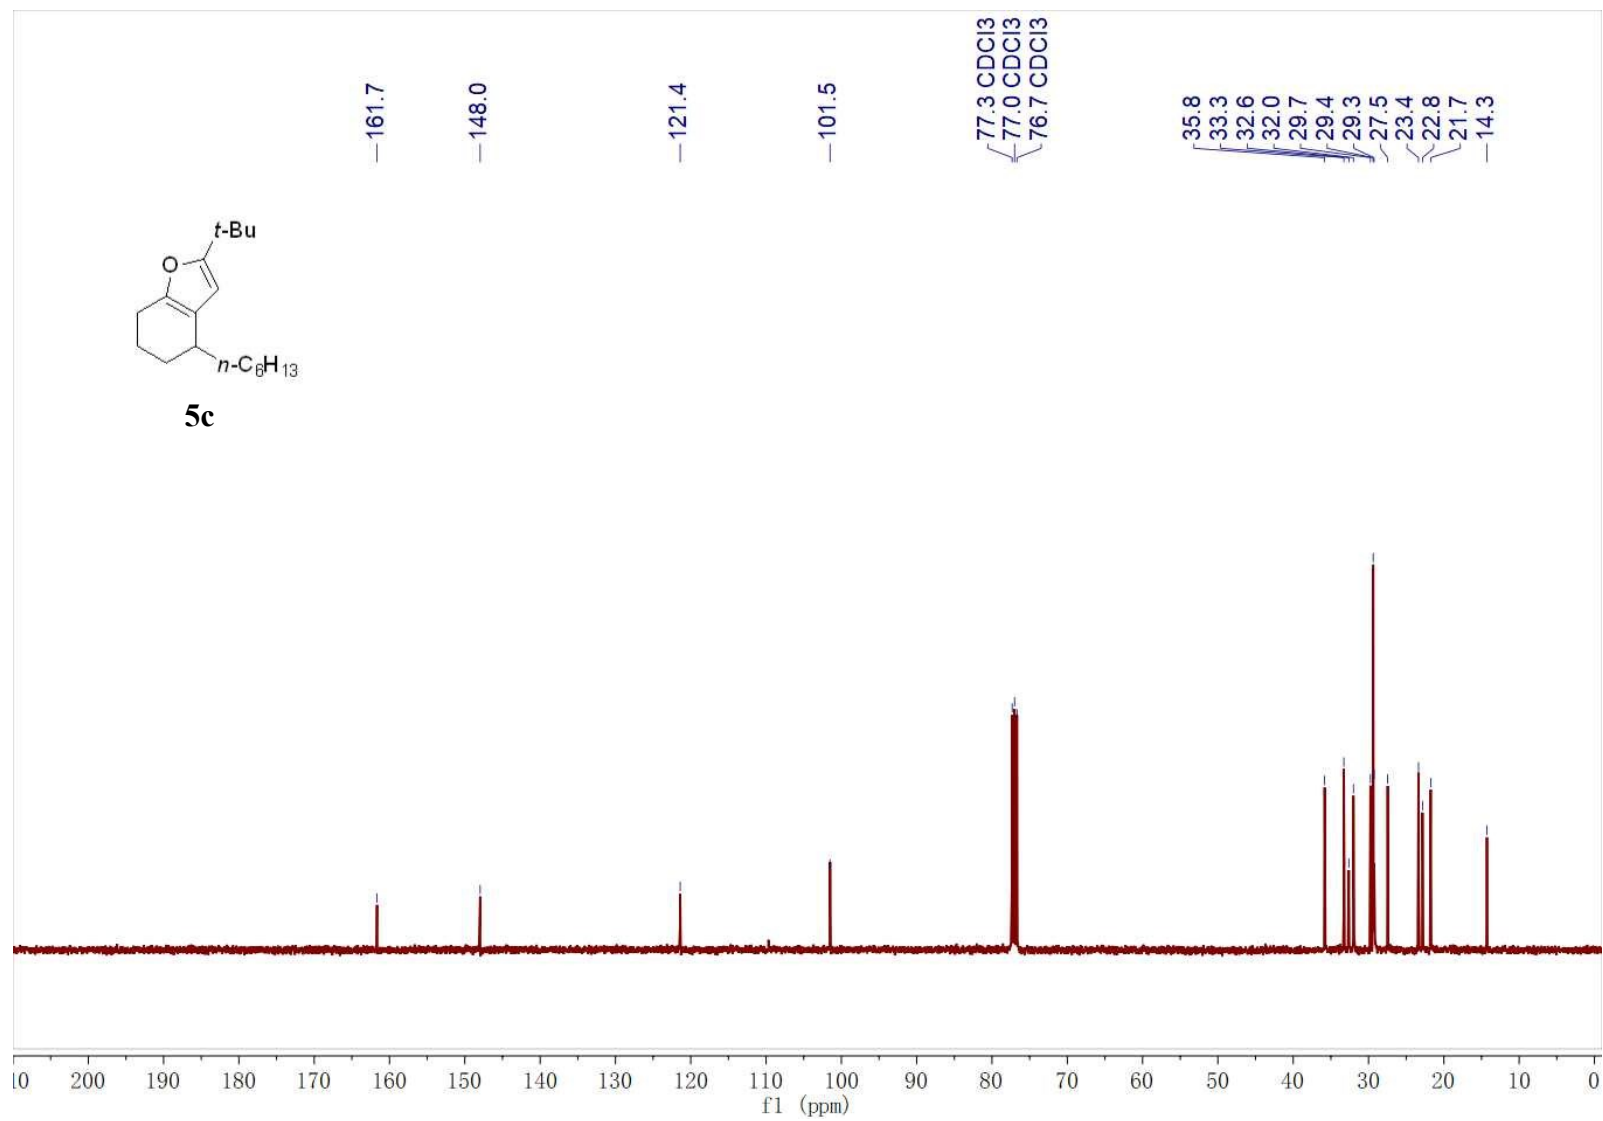

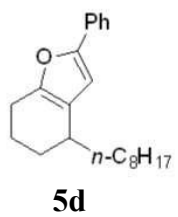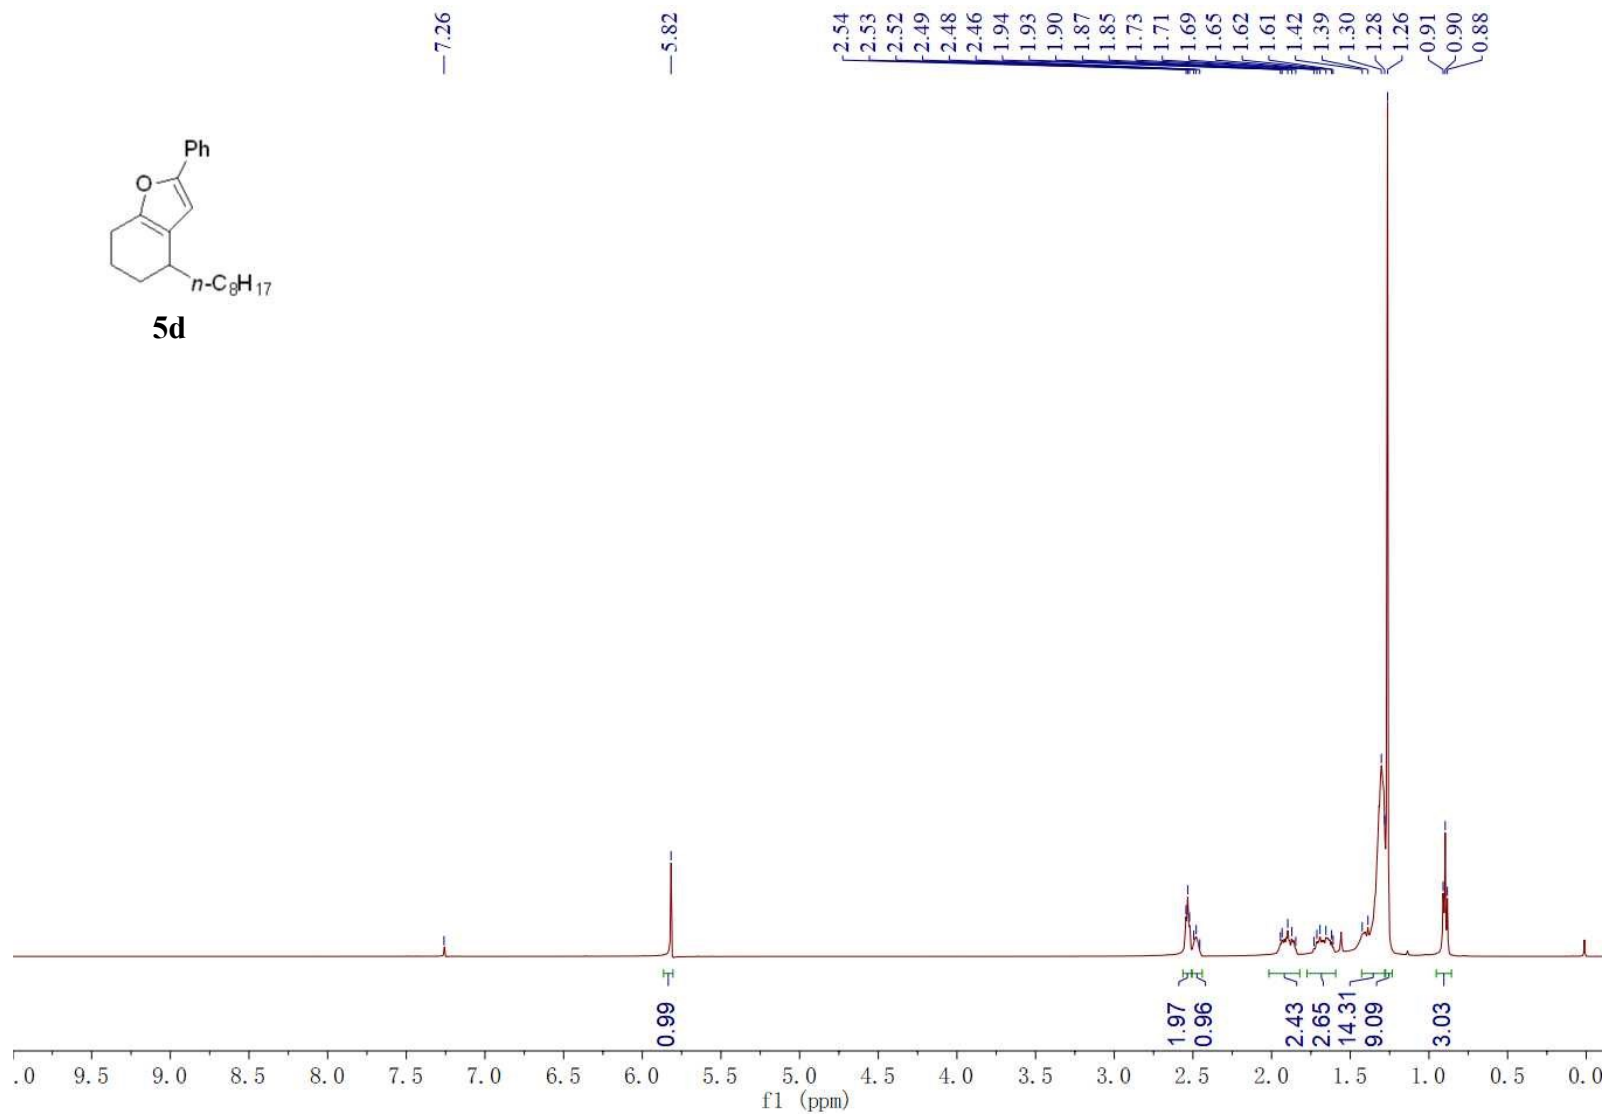

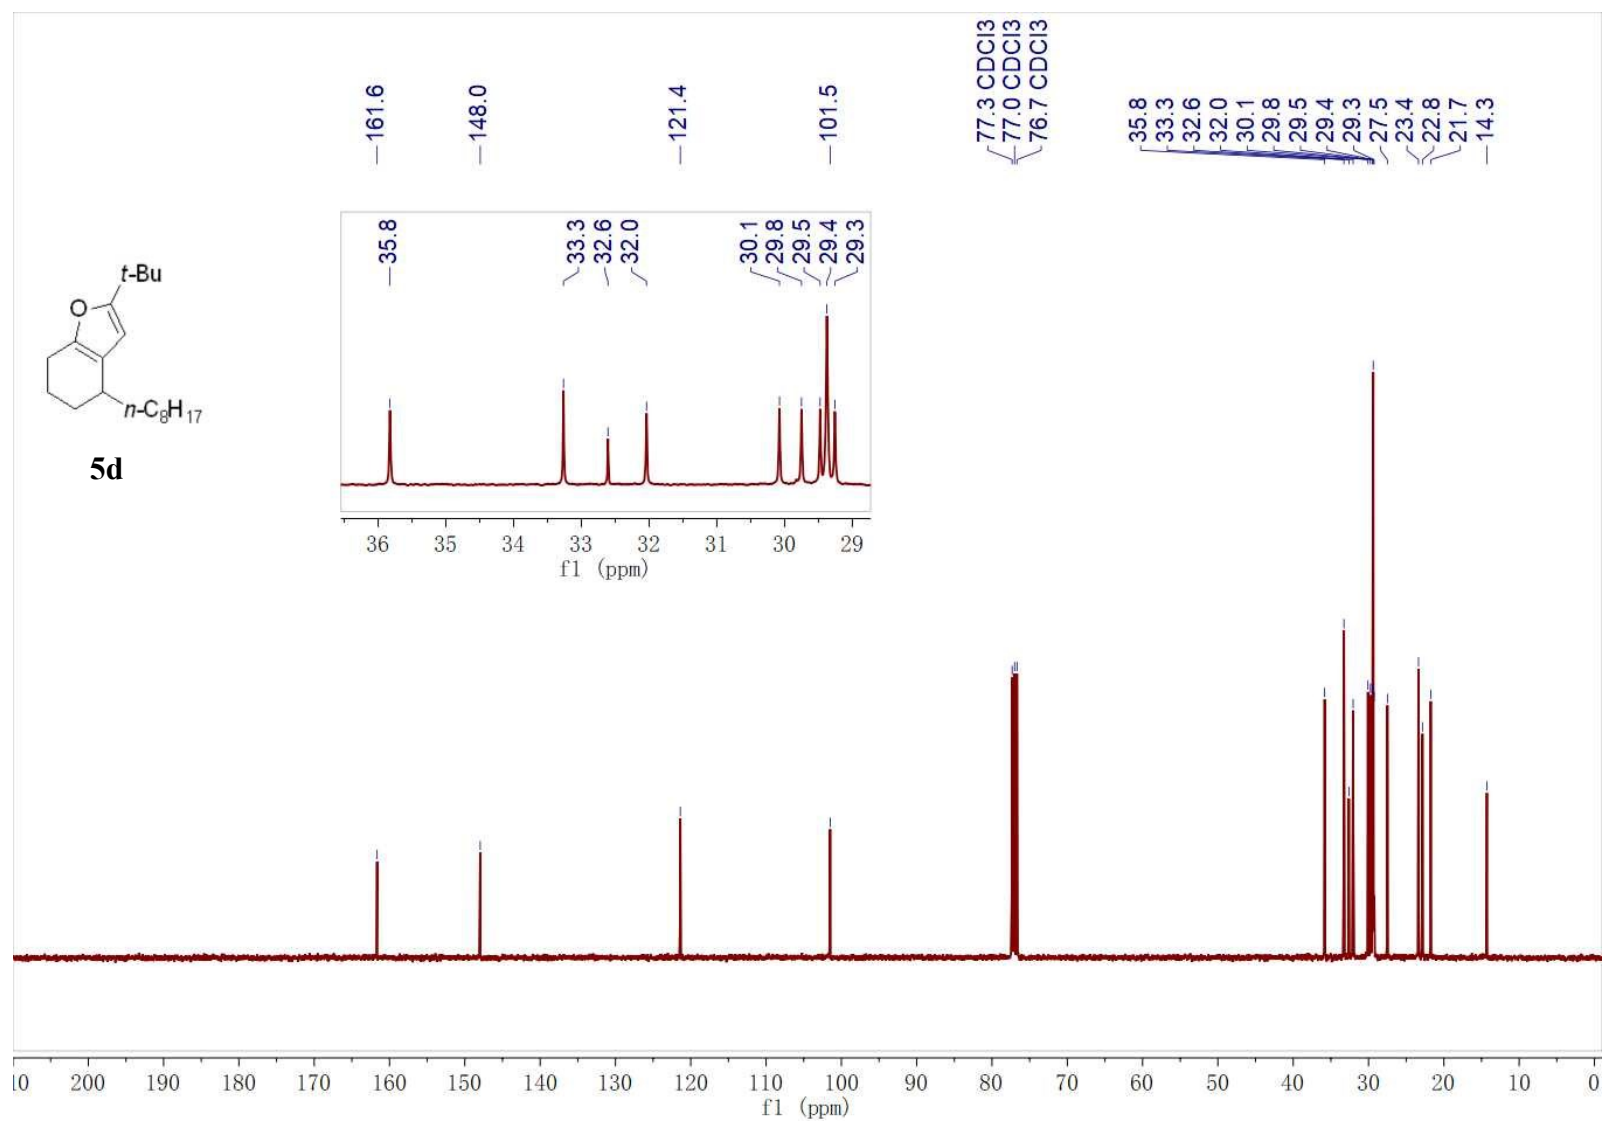



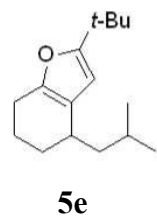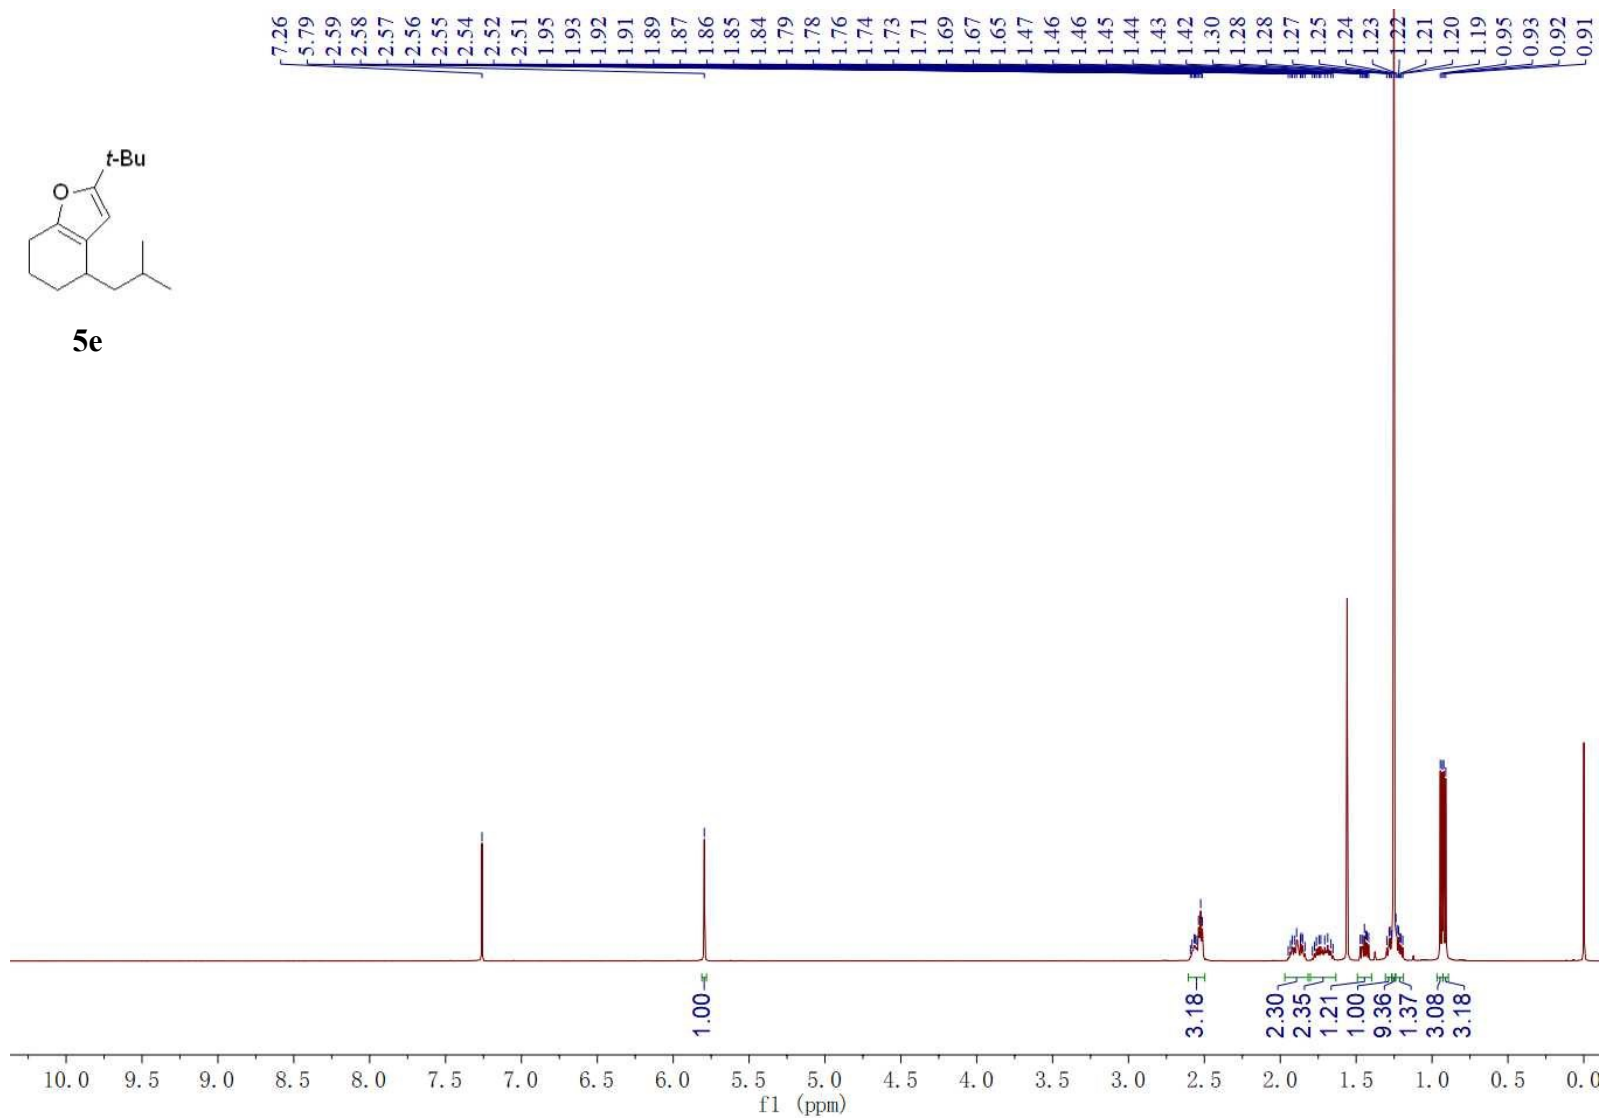

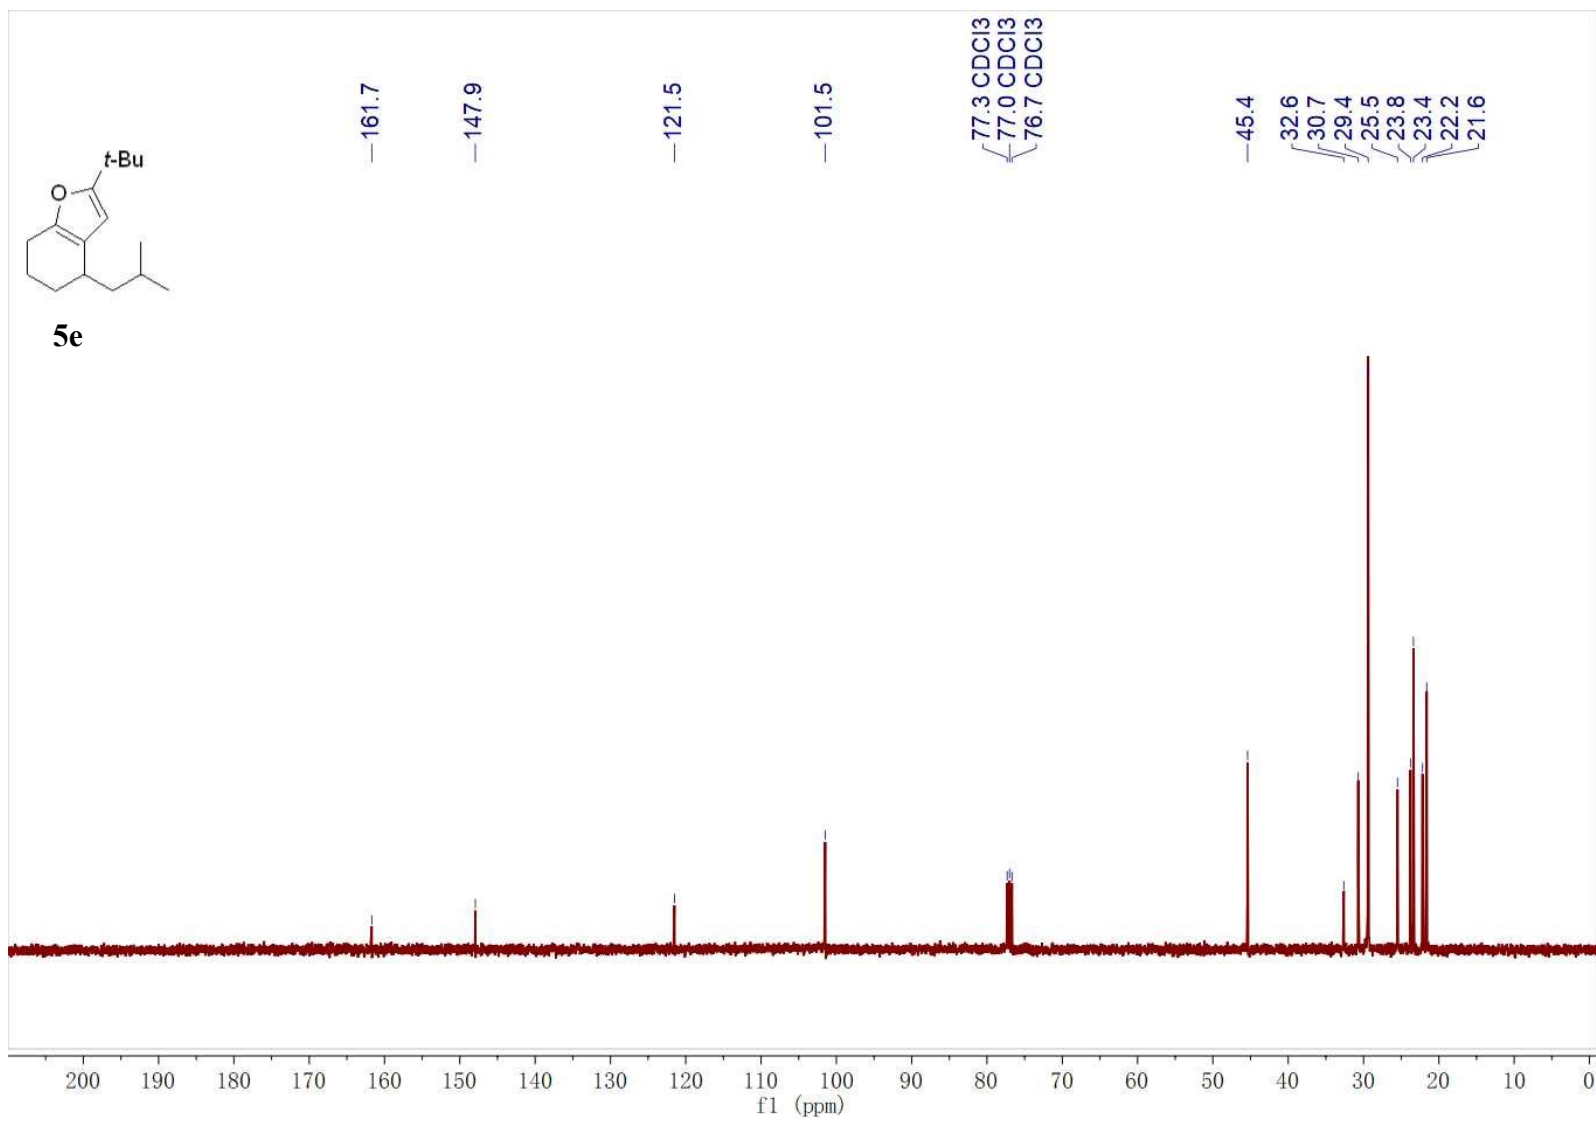

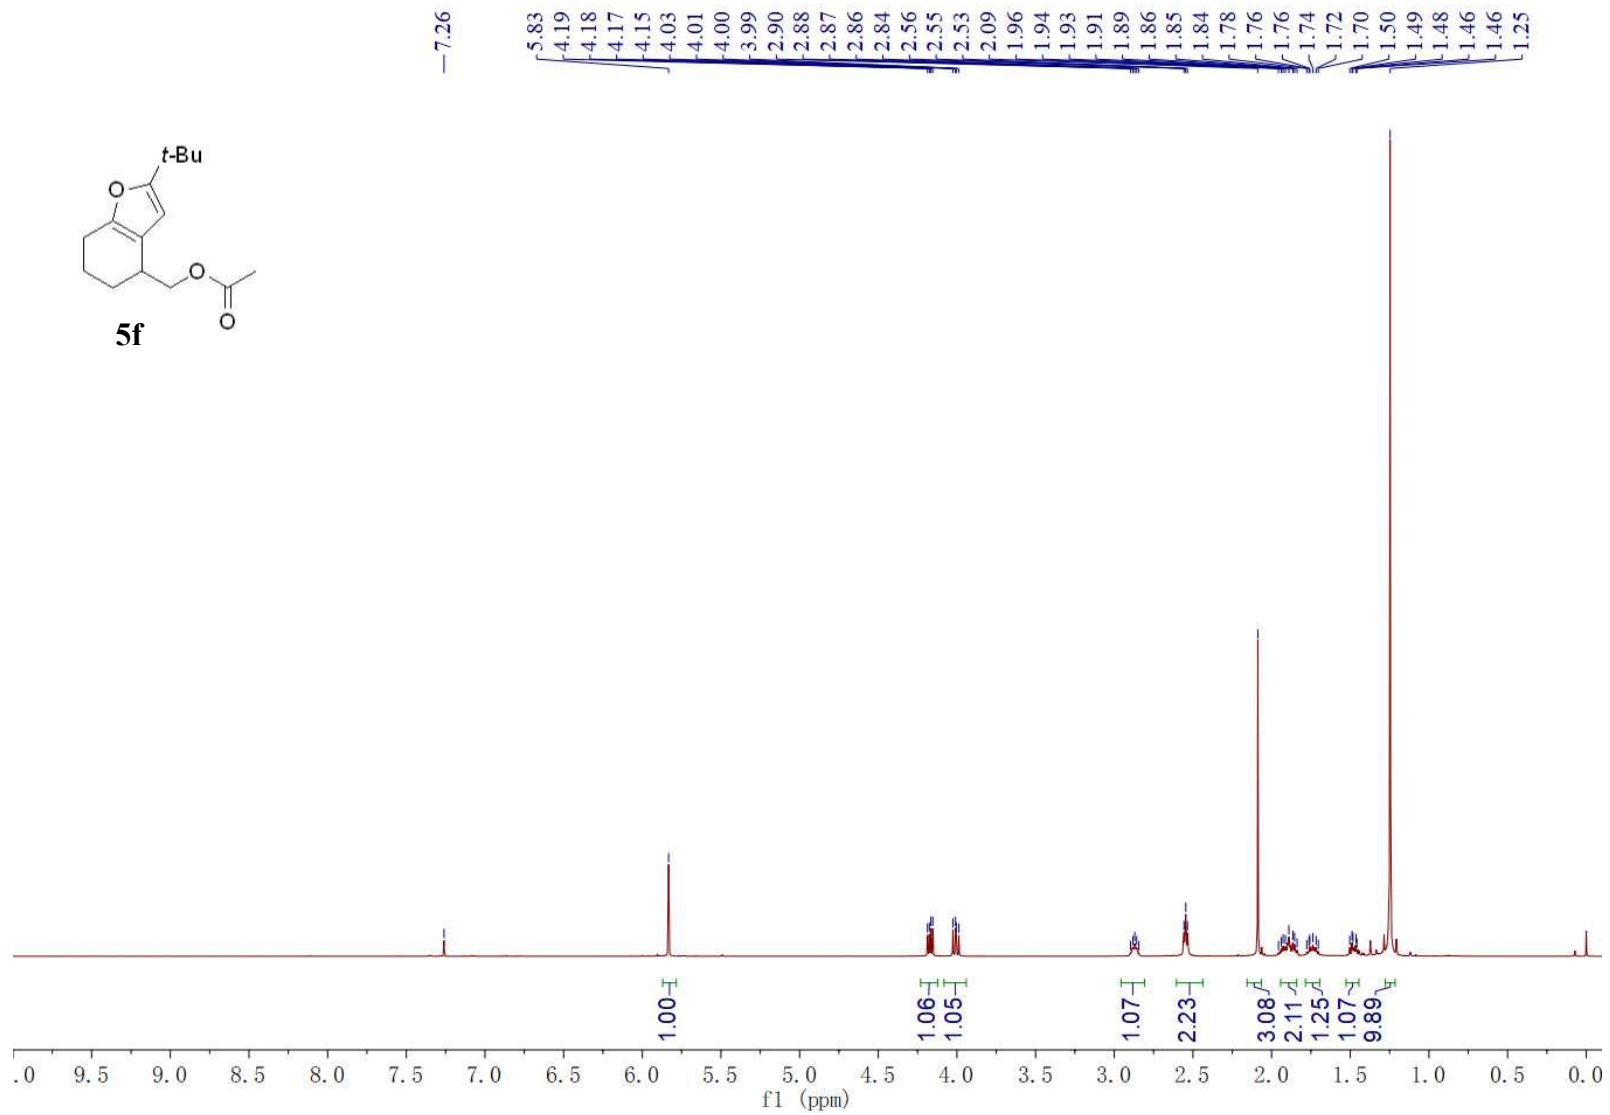

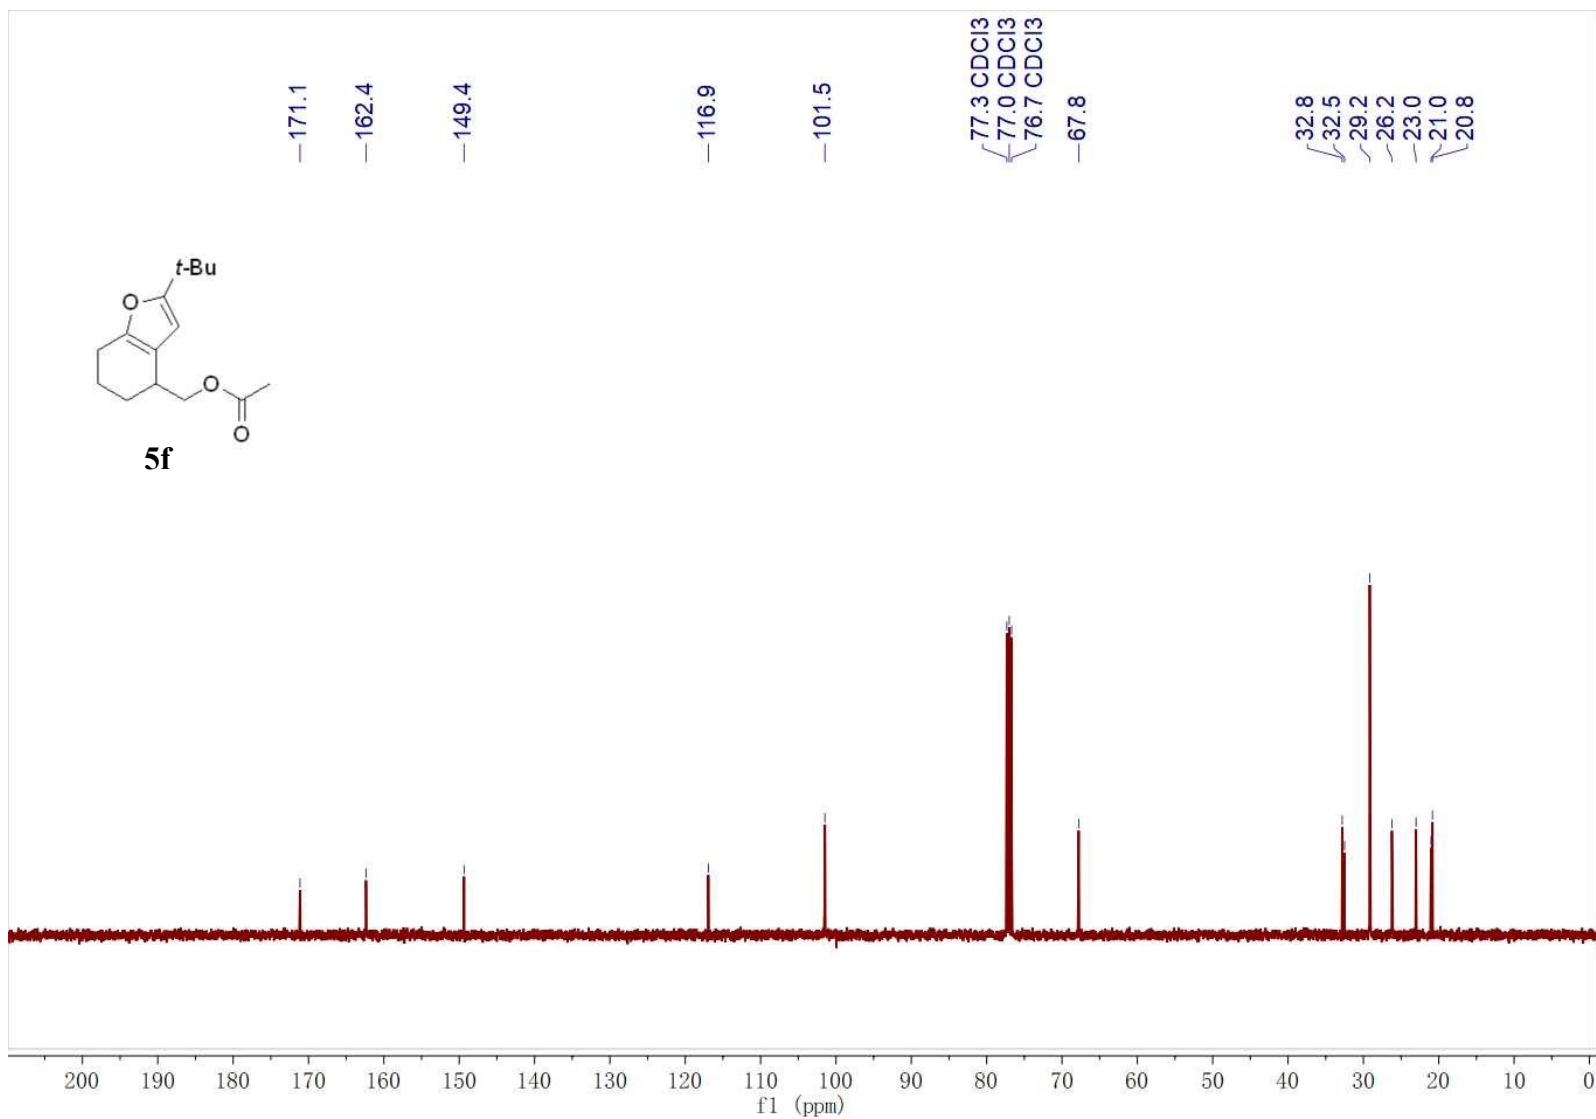

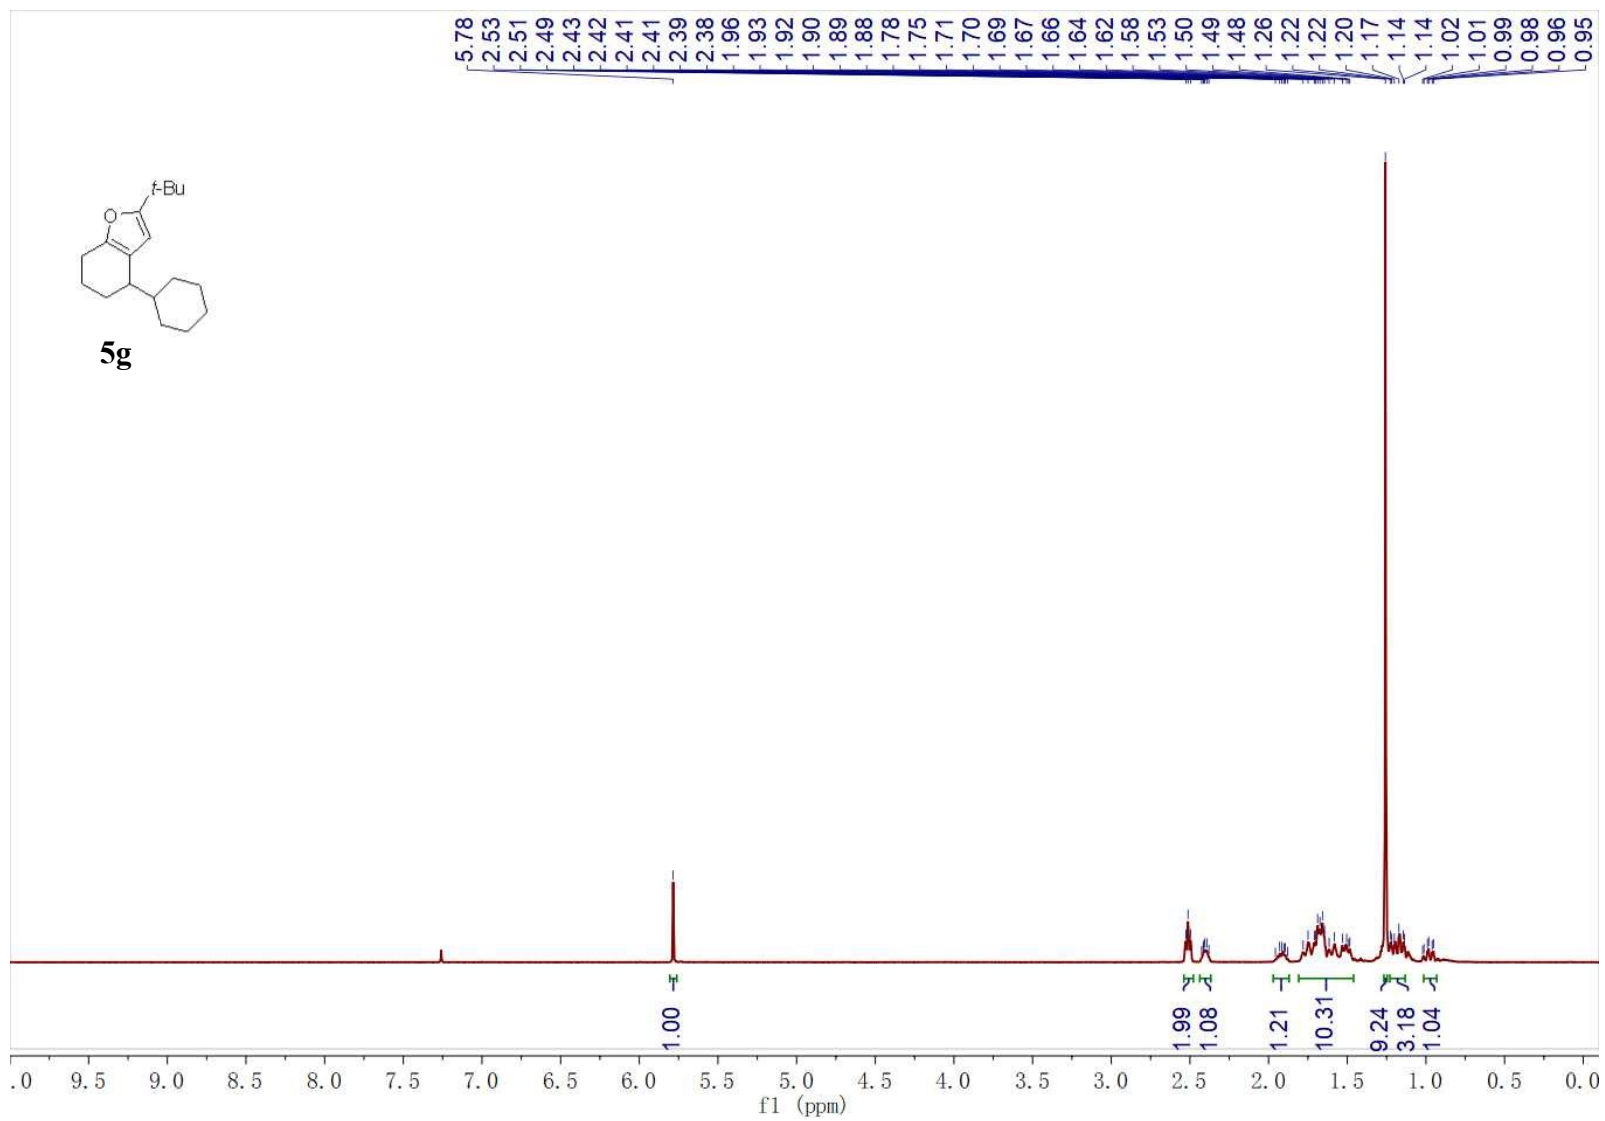

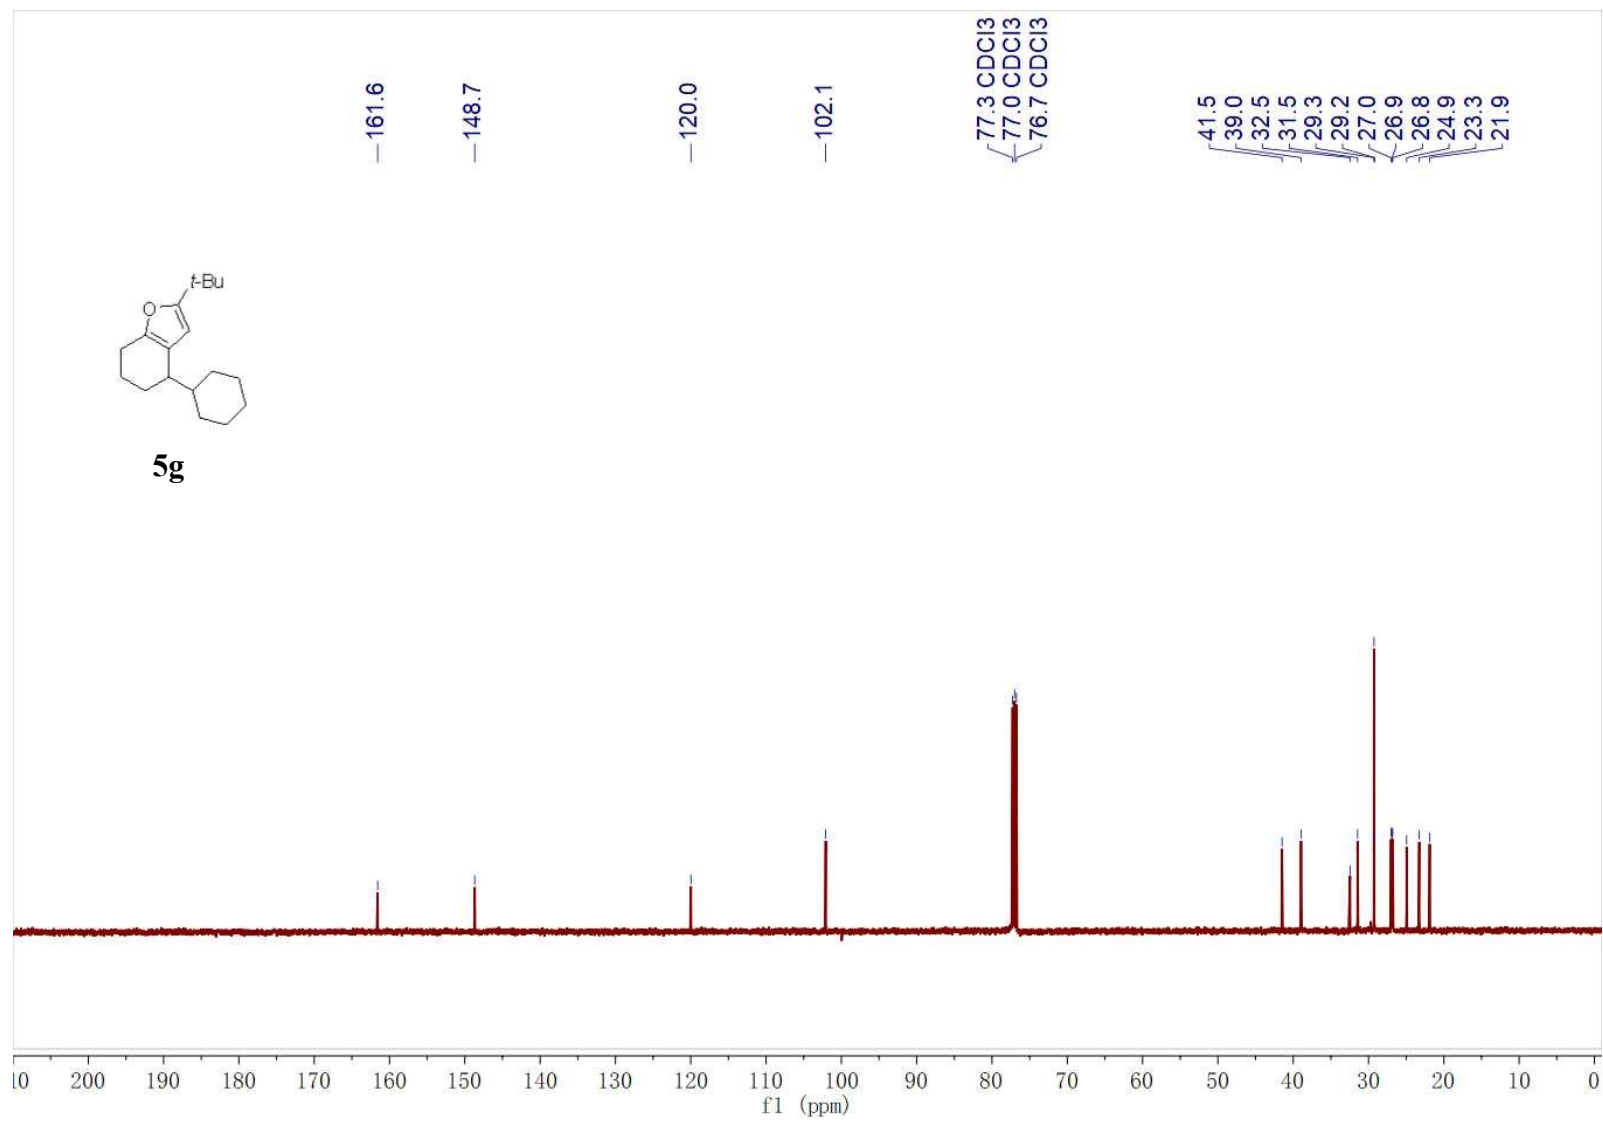

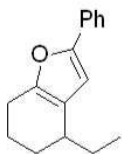

**6a**

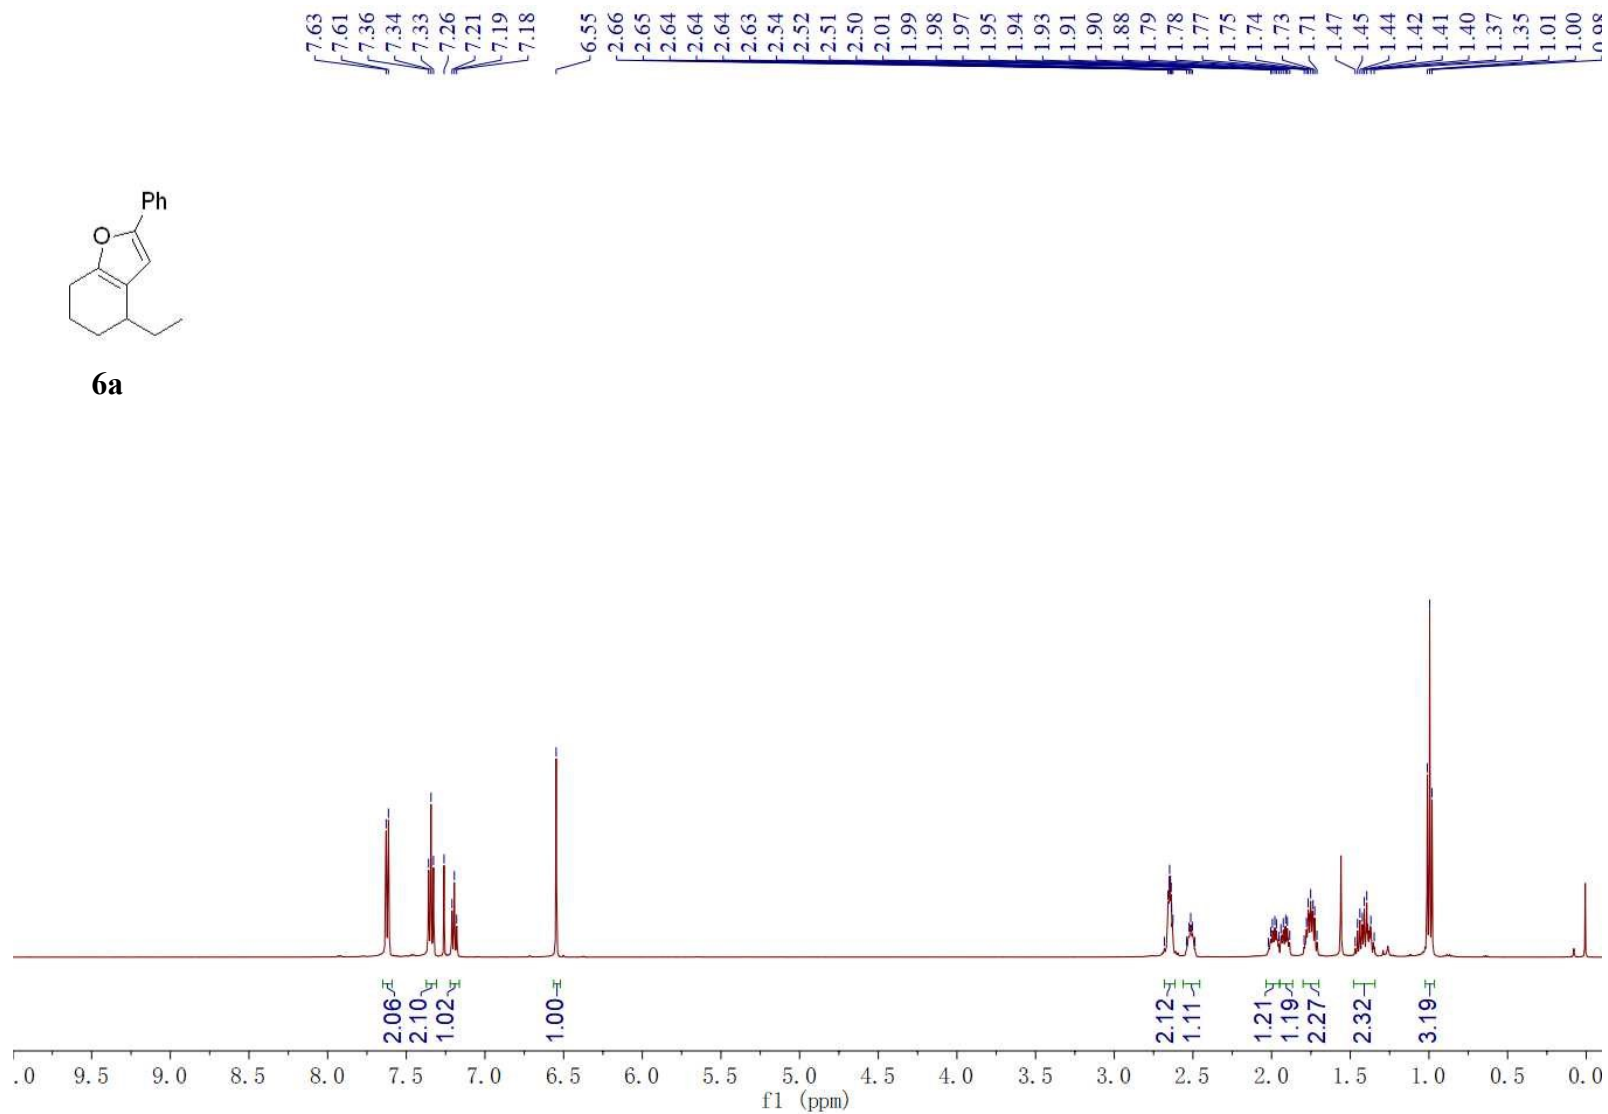

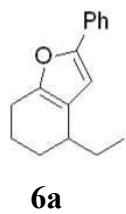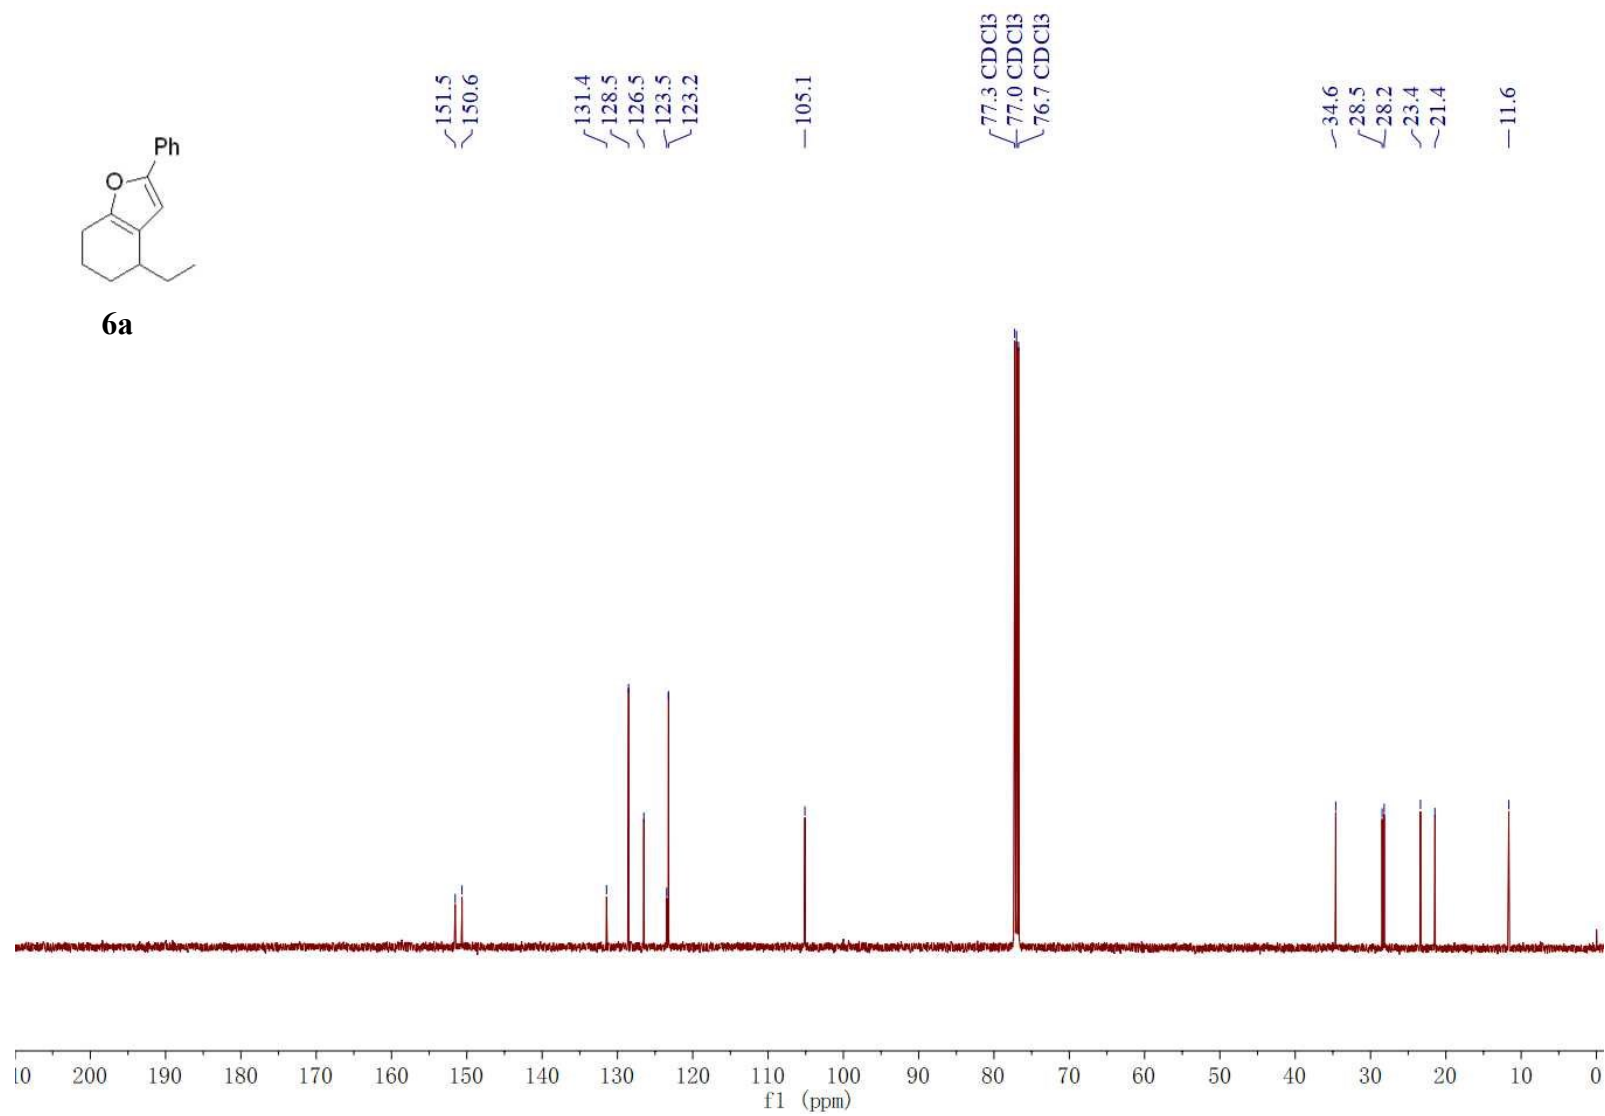



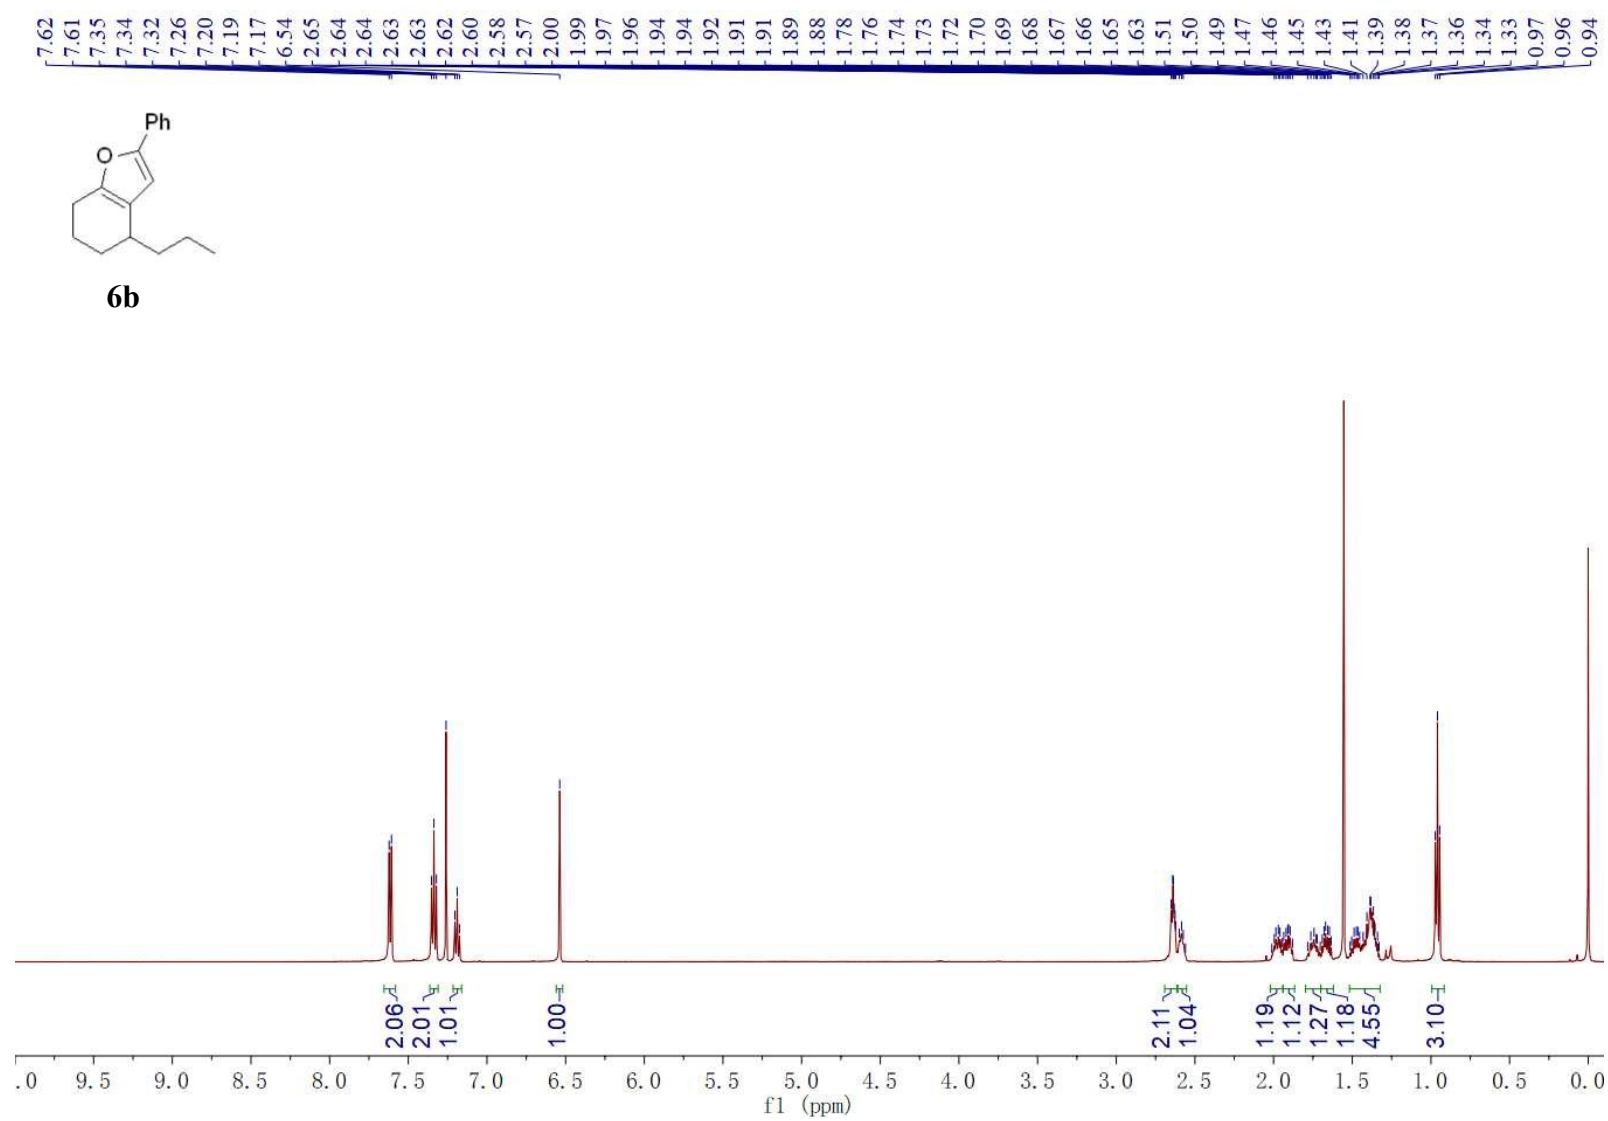

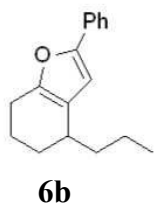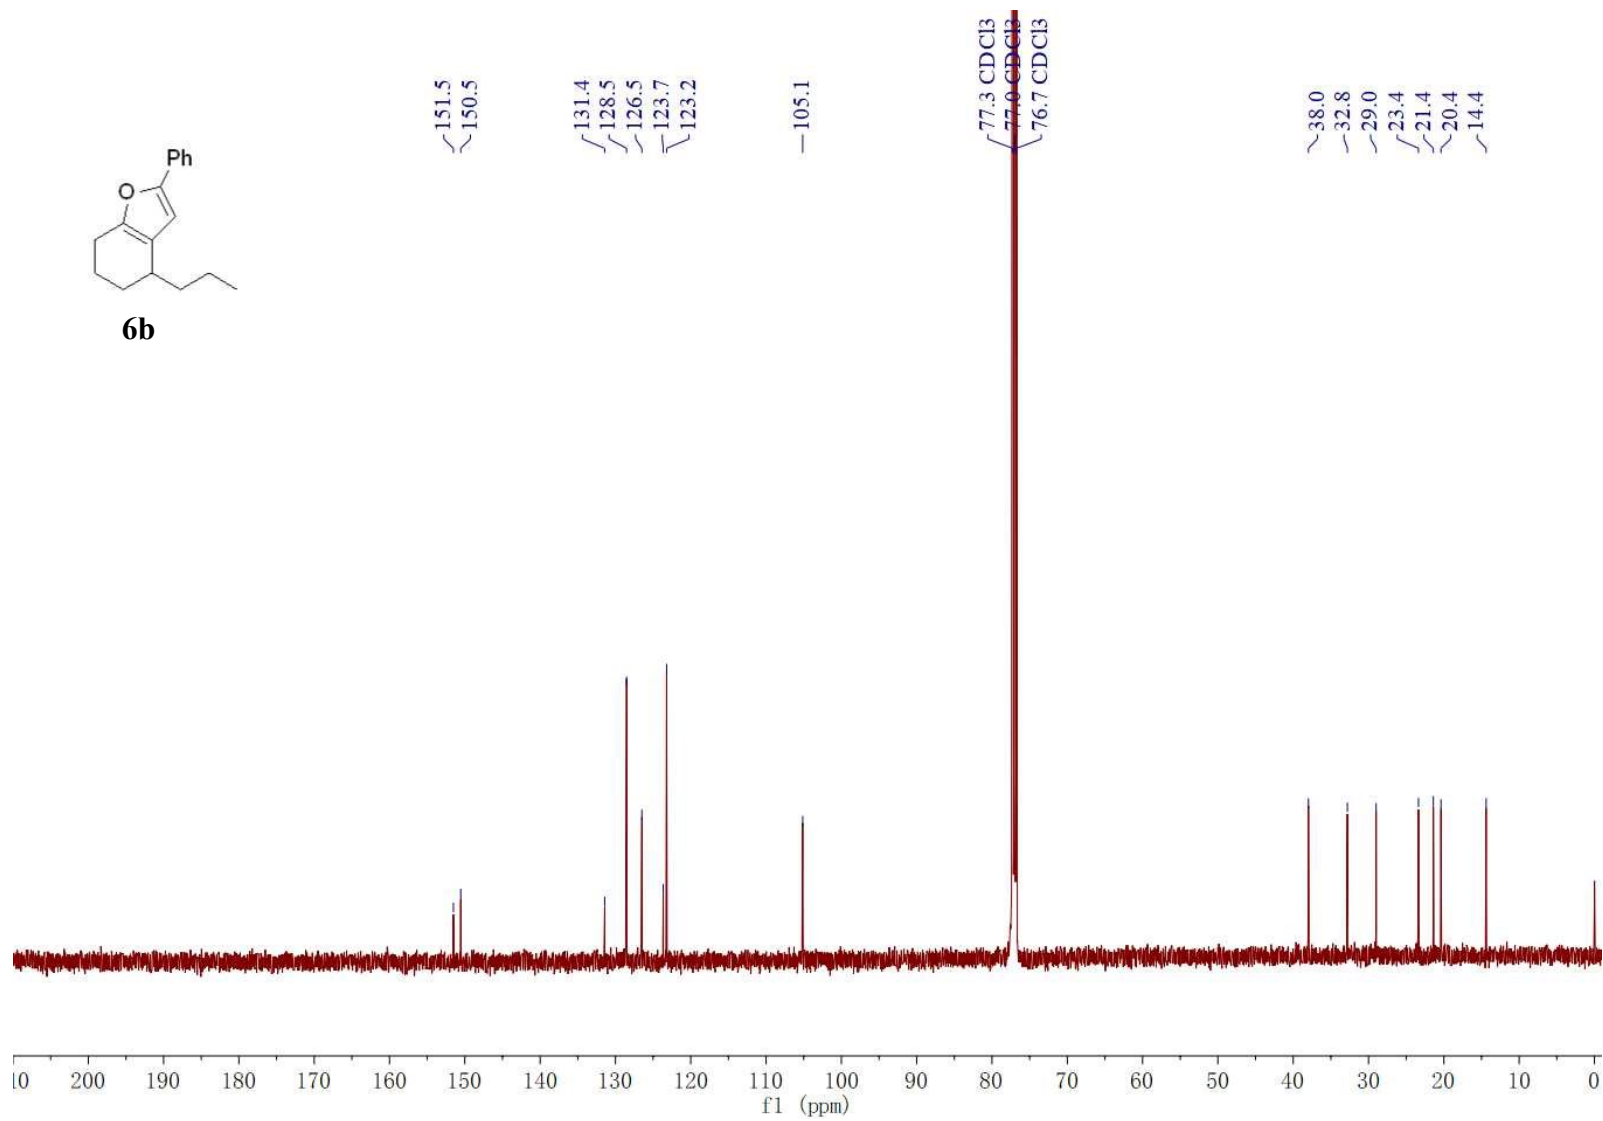

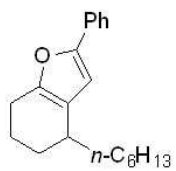

**6c**

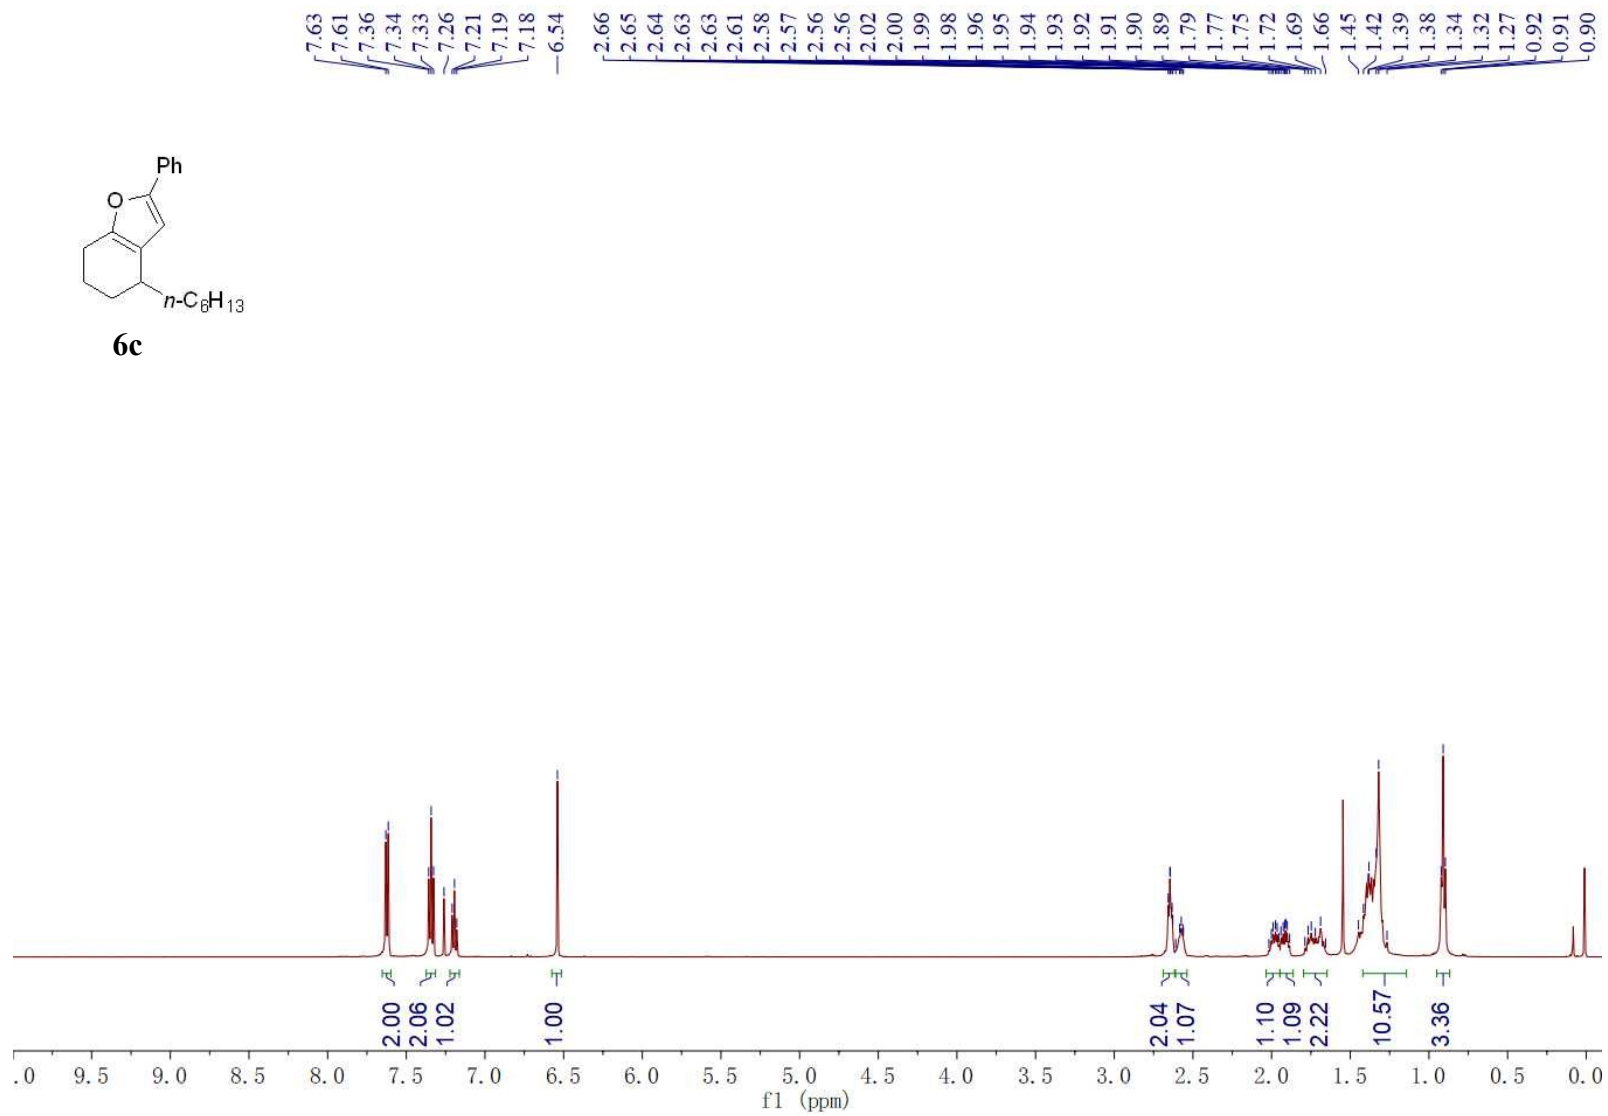

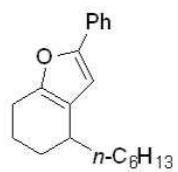

**6c**

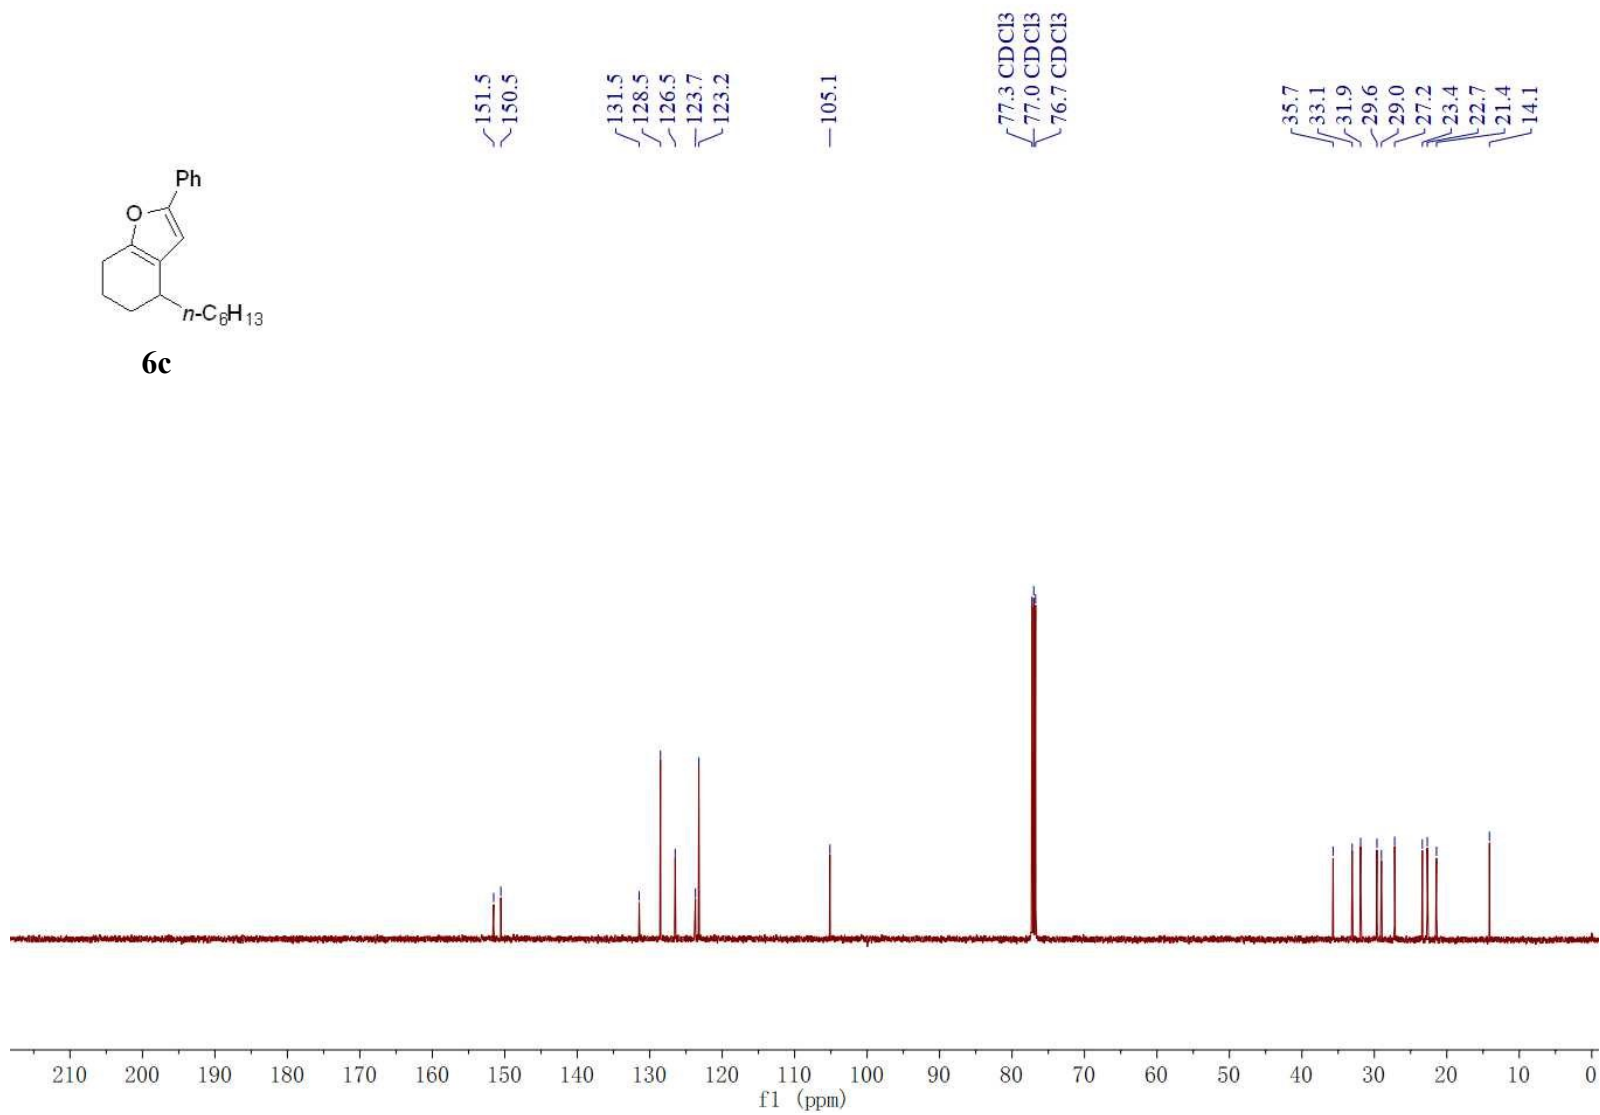

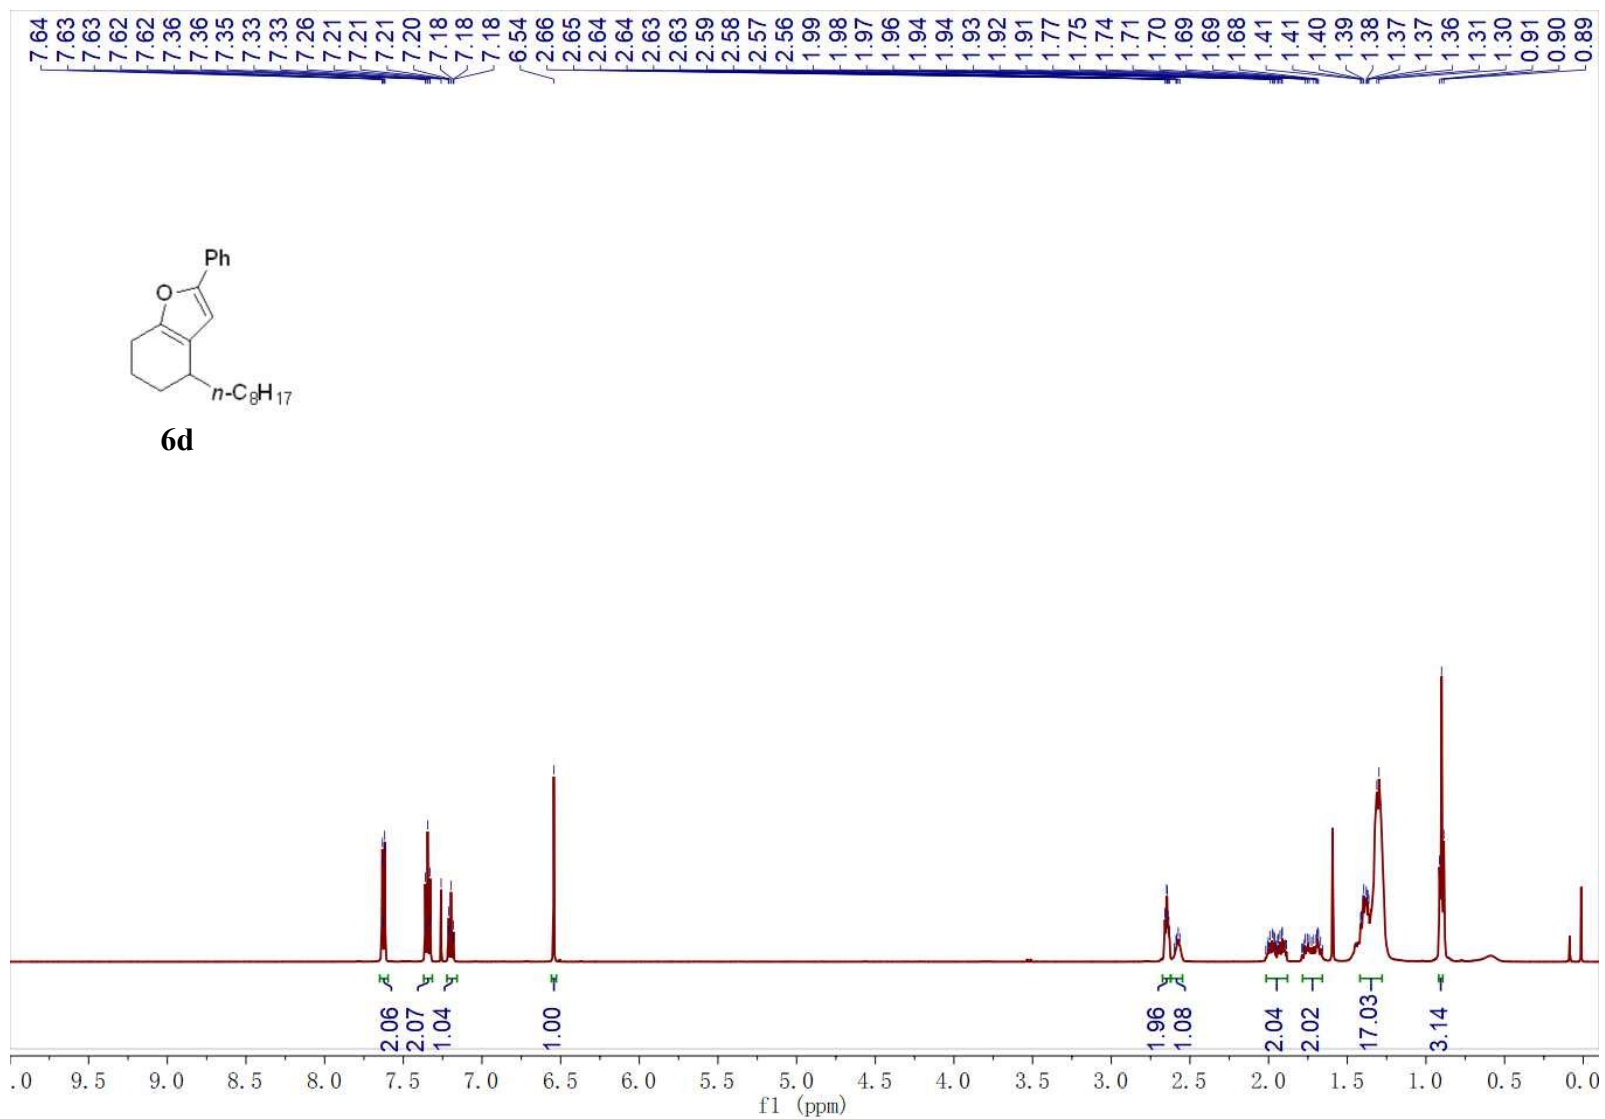

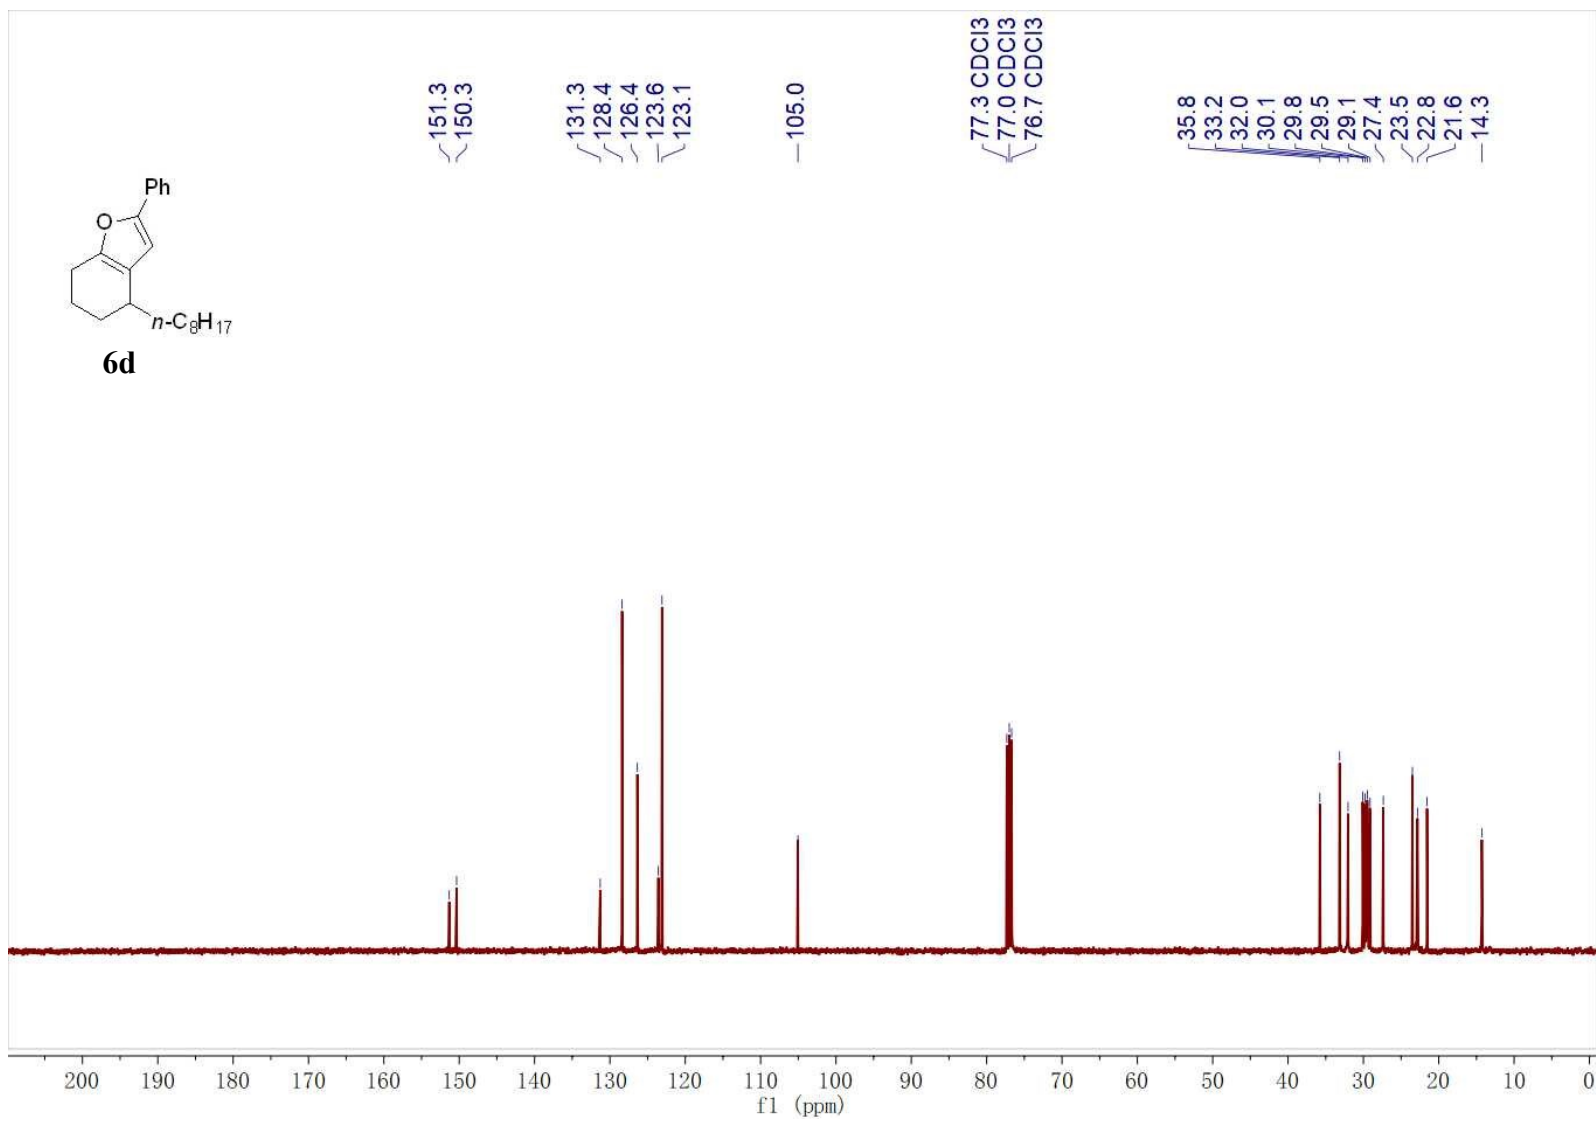

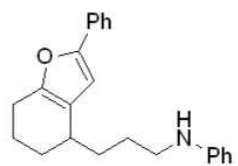

6e

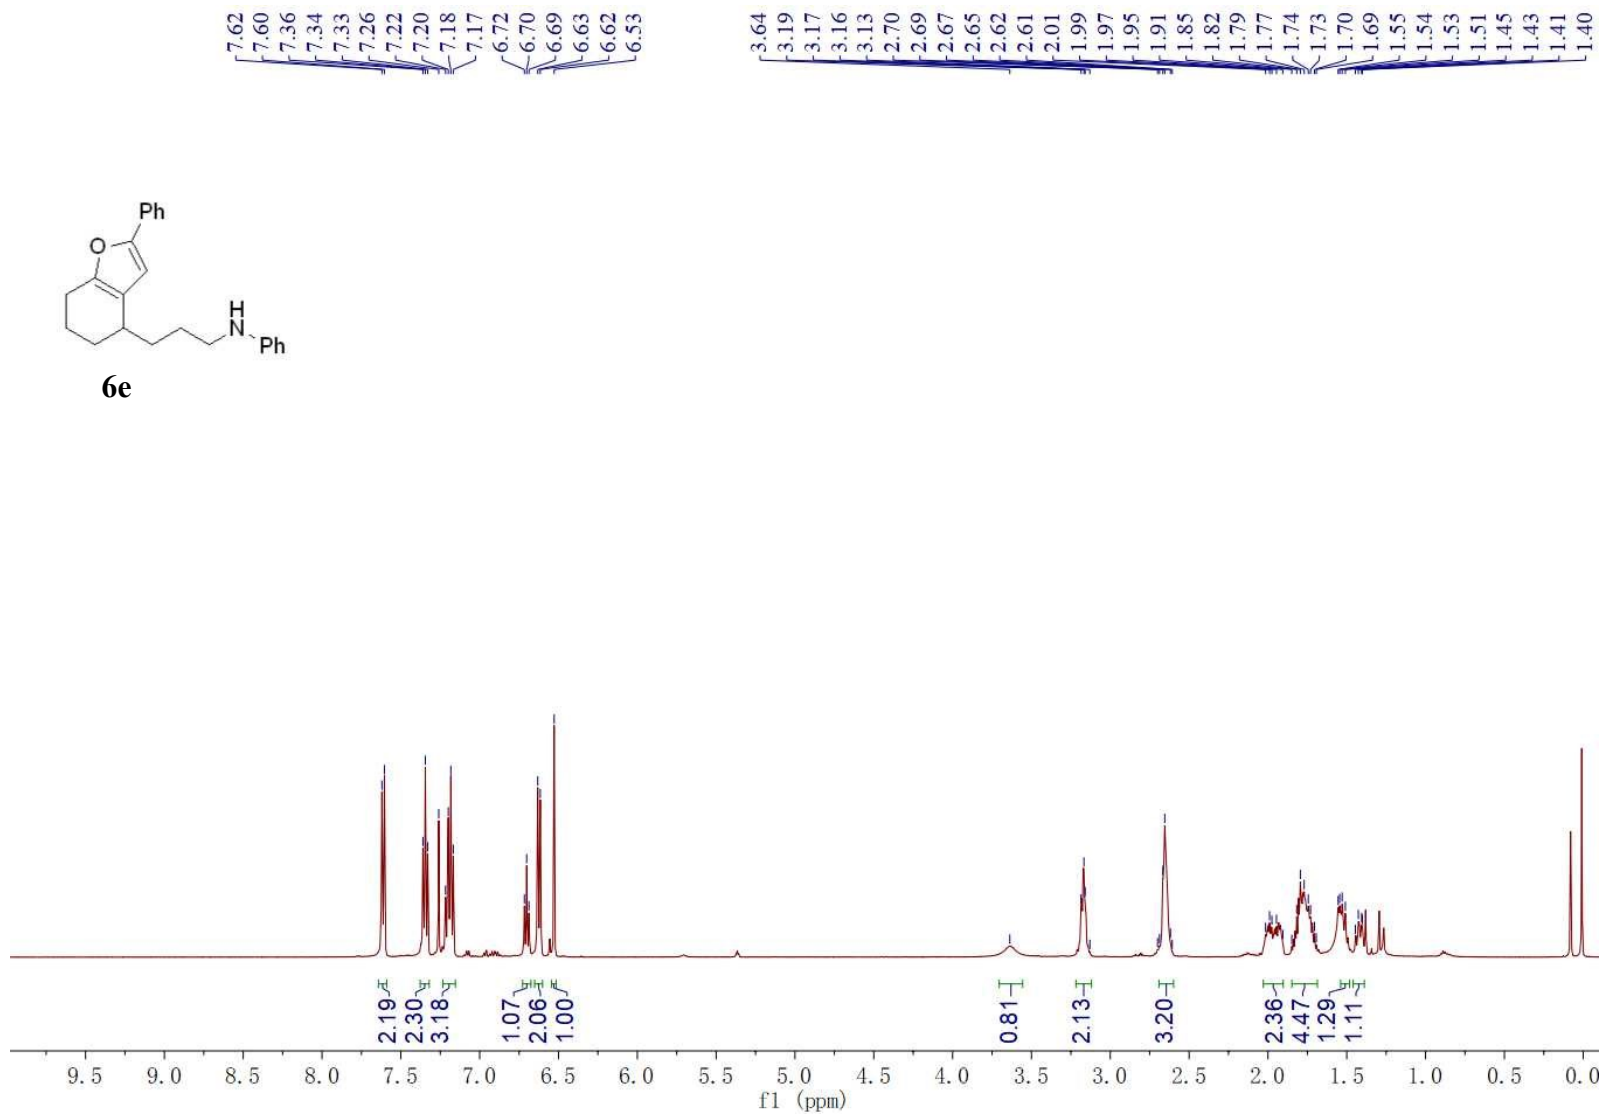

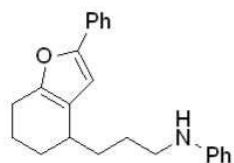

**6e**

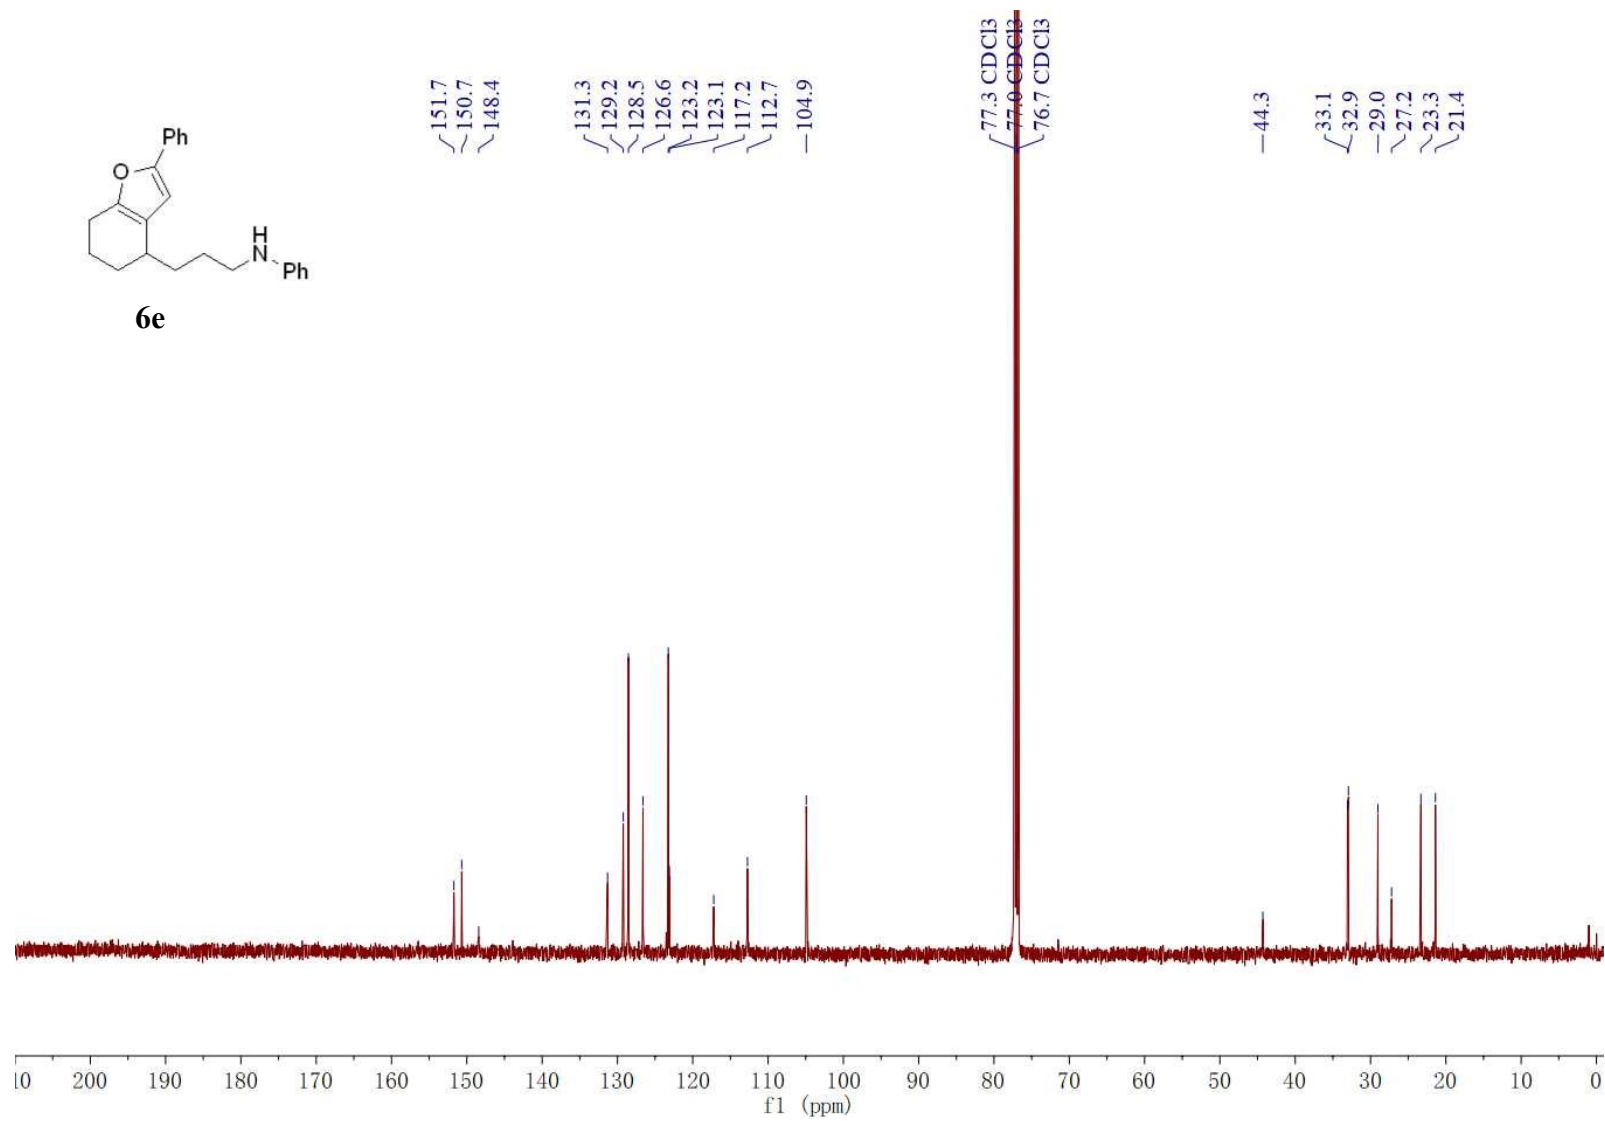



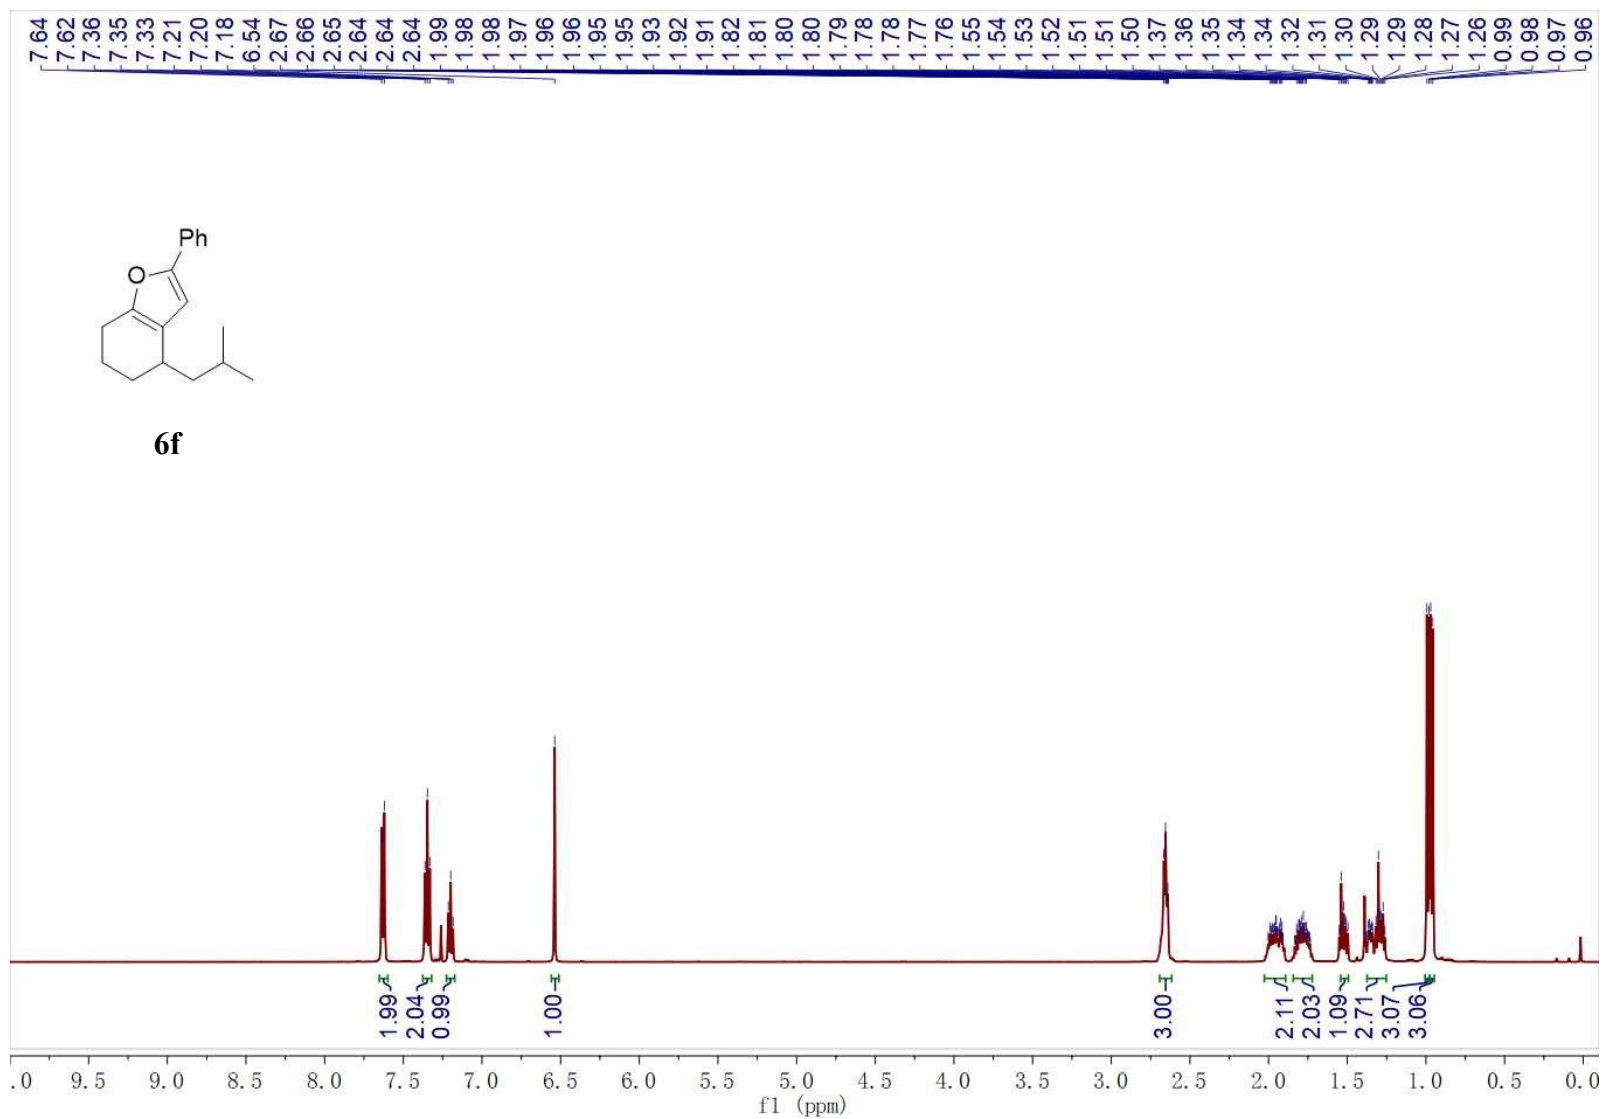

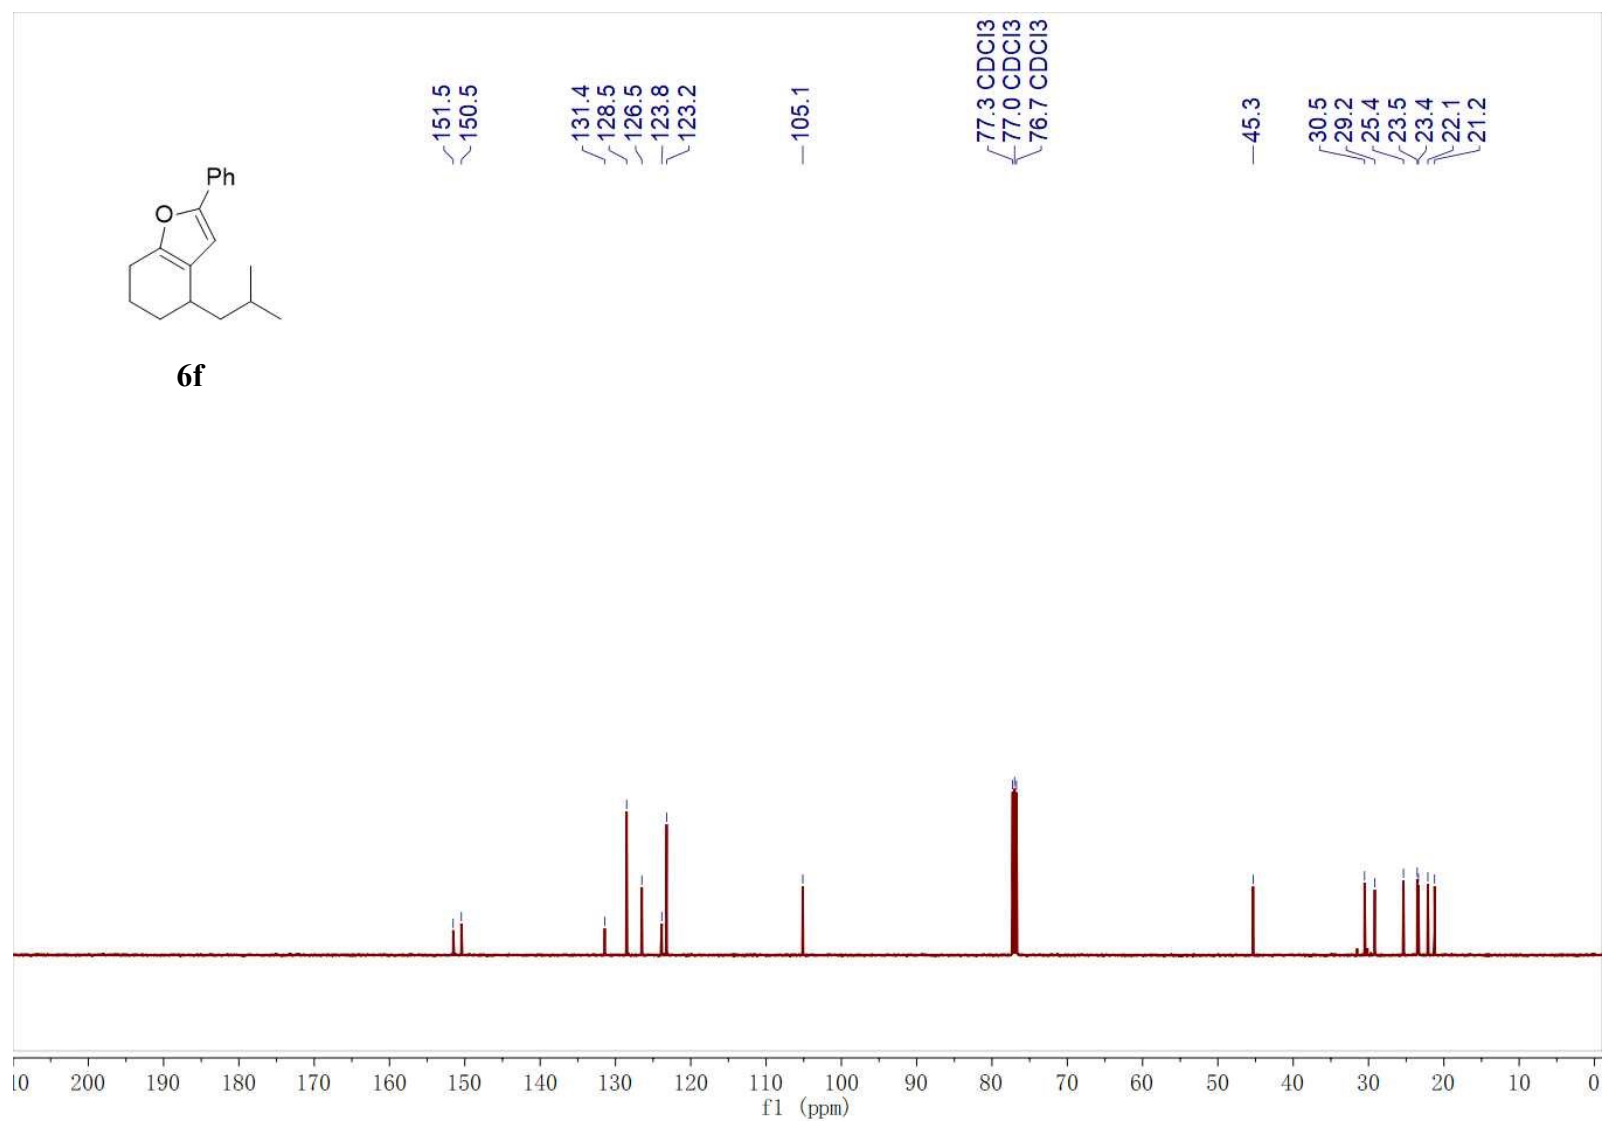

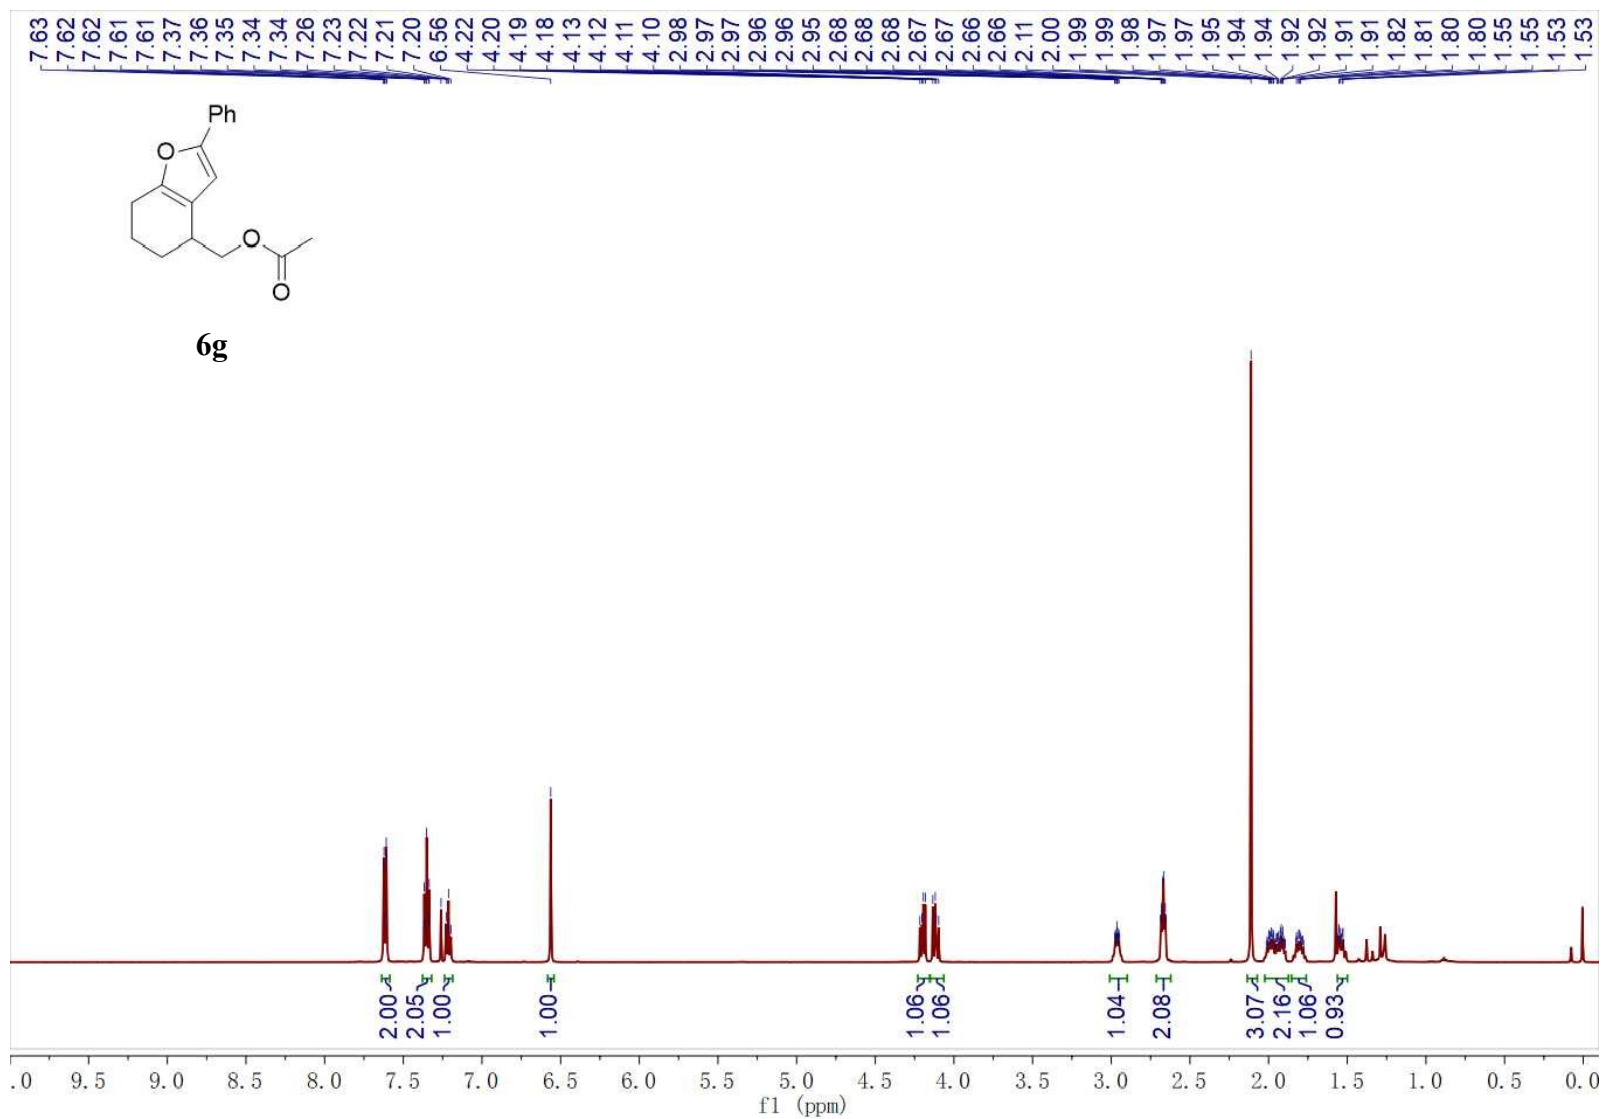

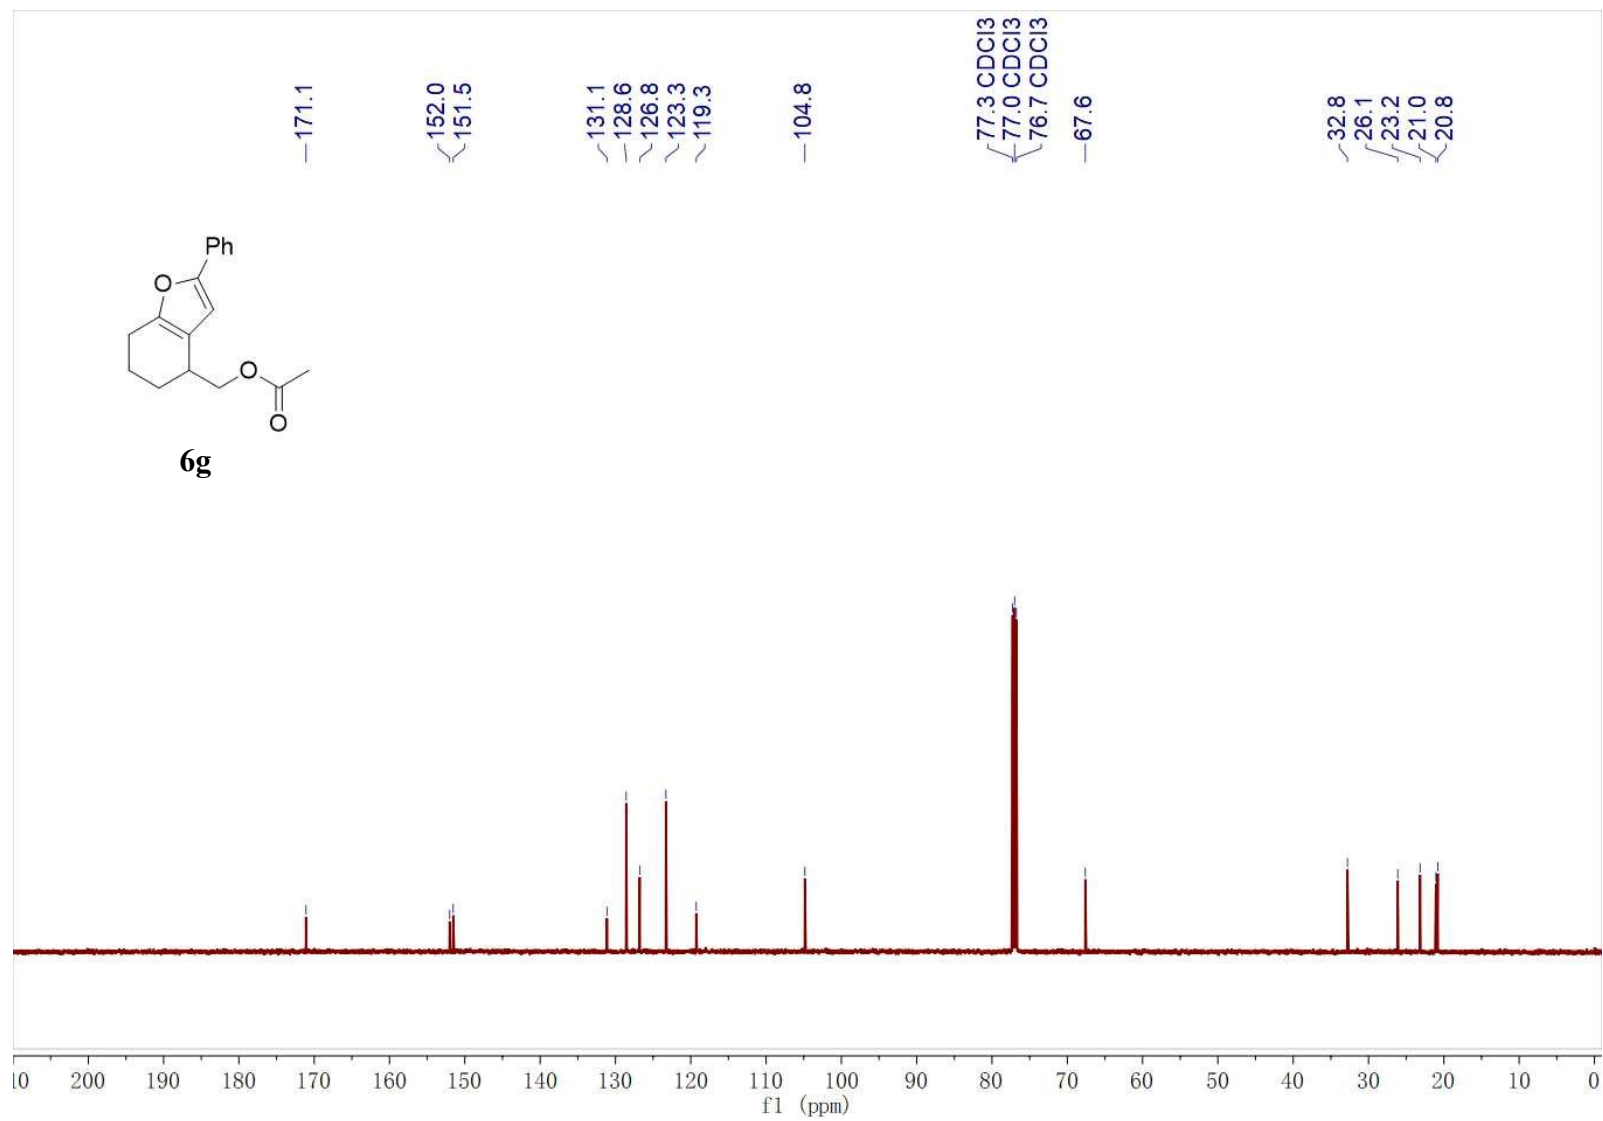

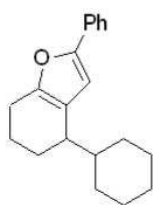

**6h**

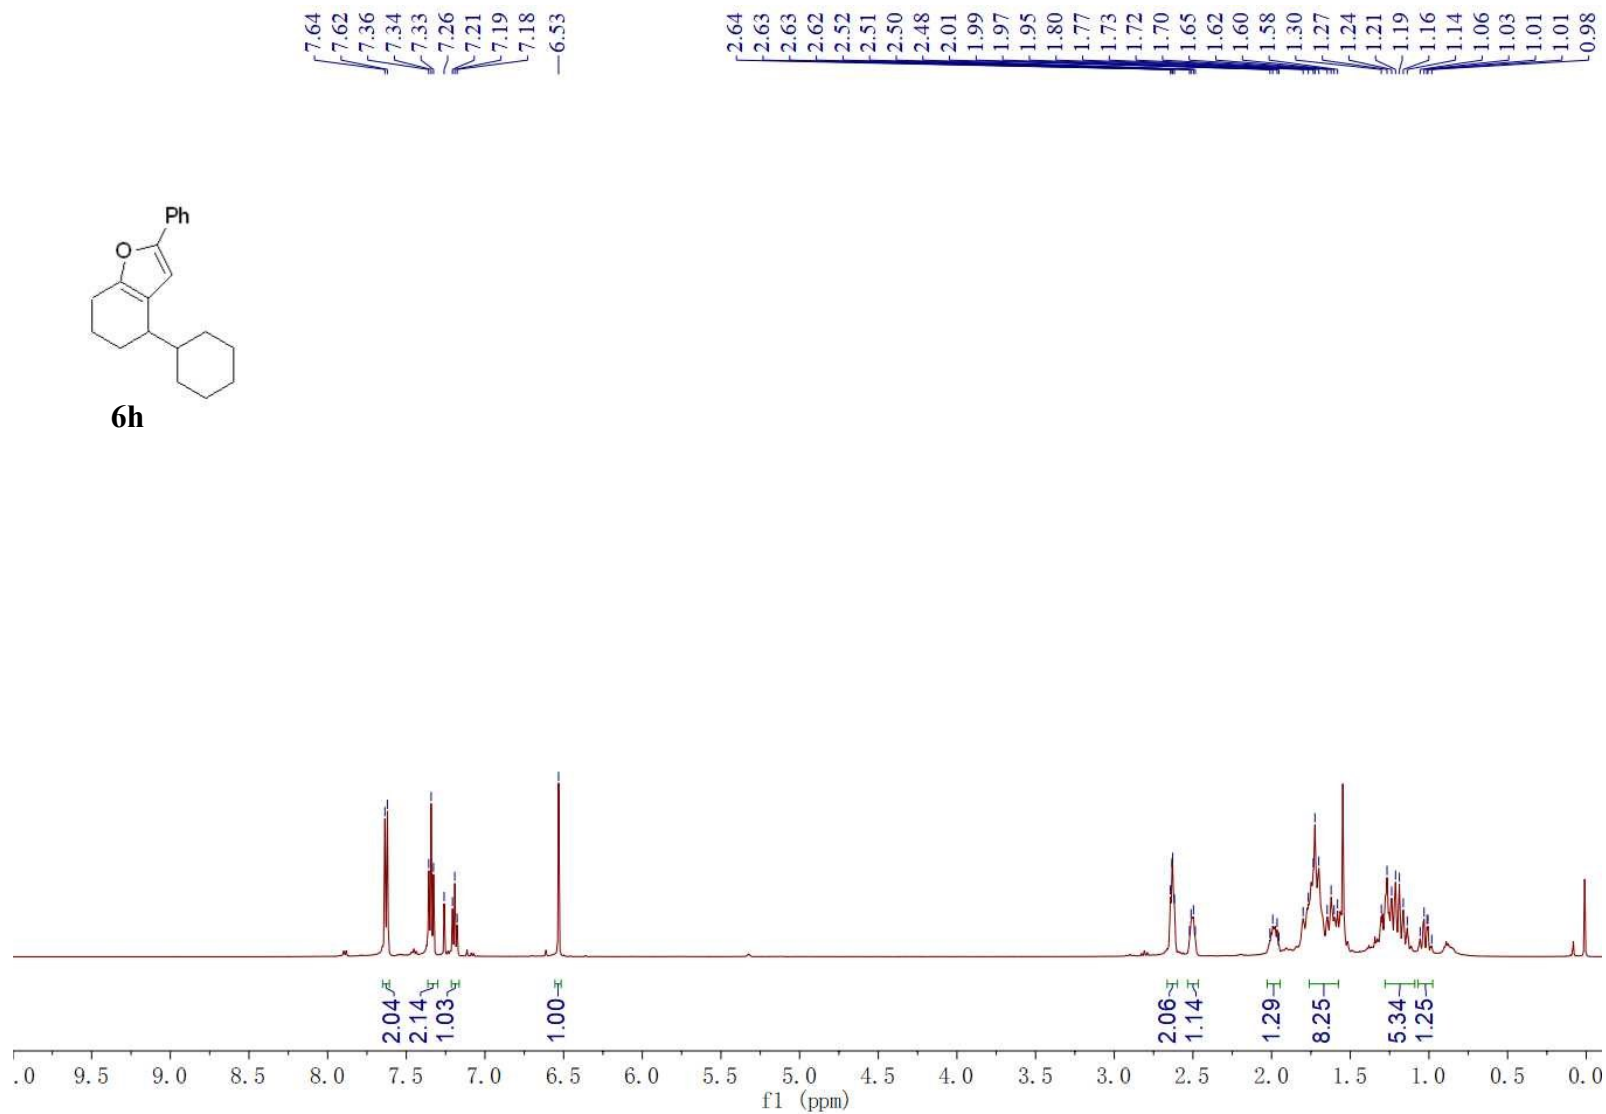

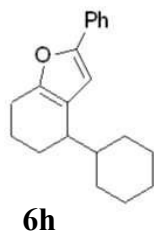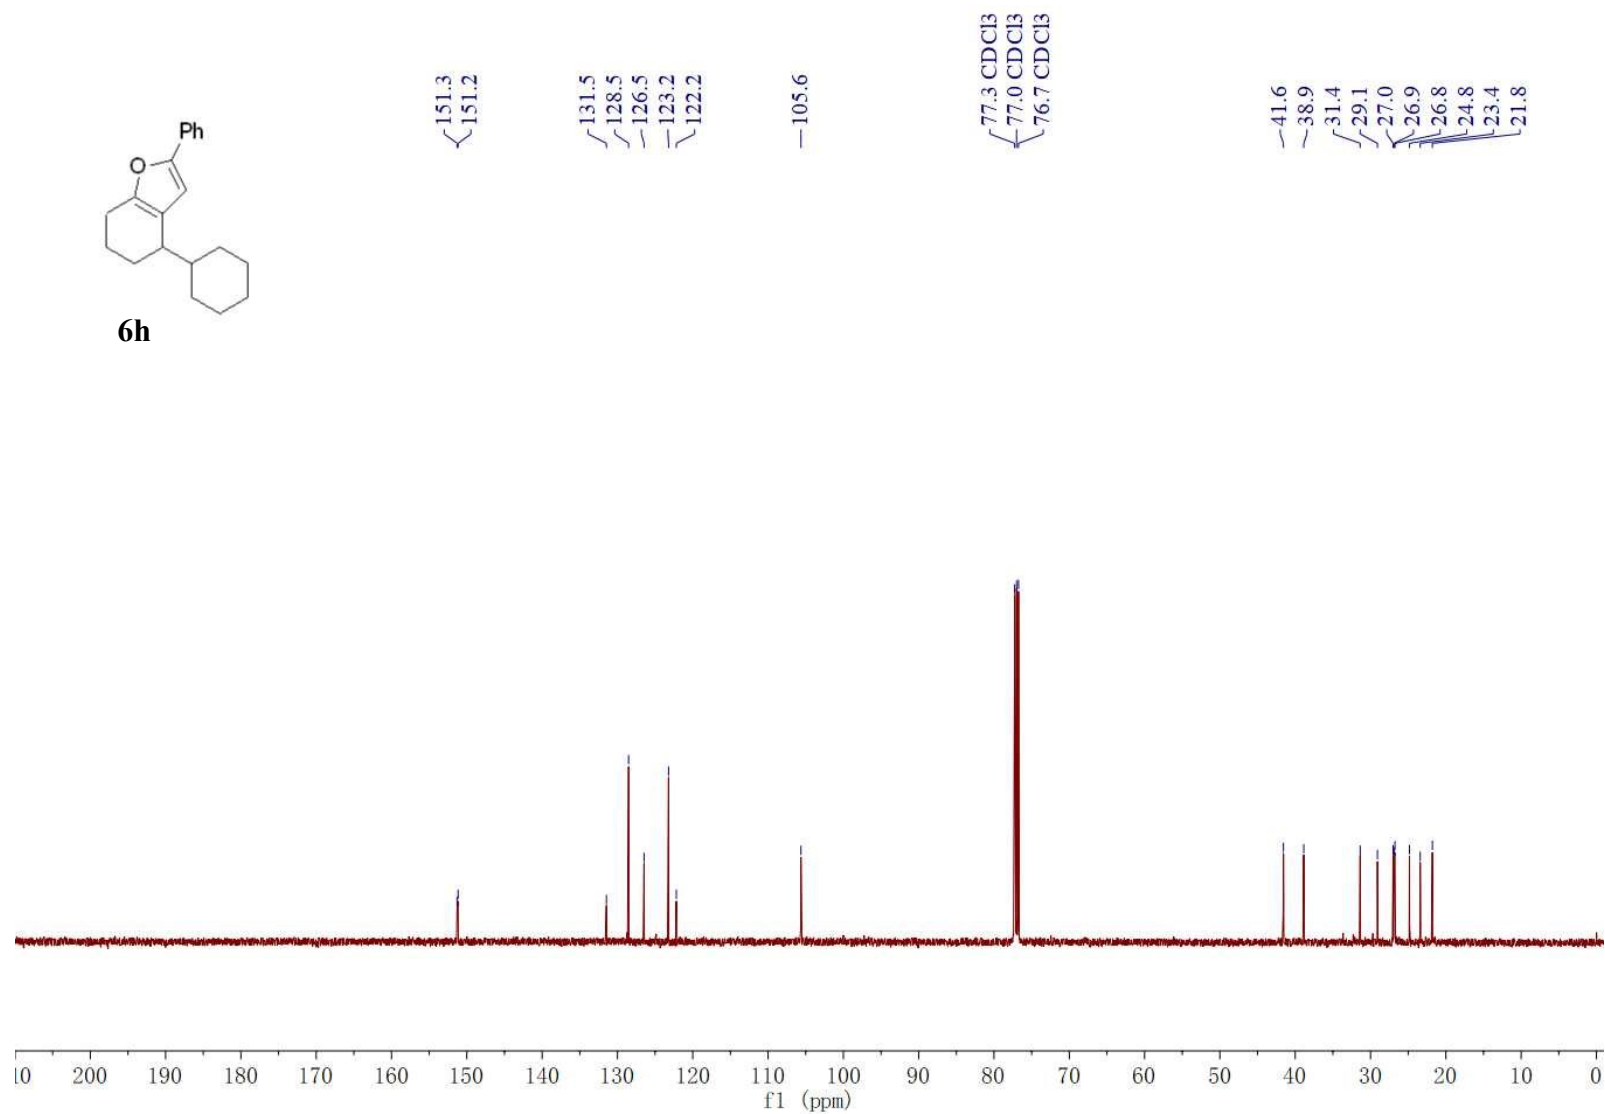

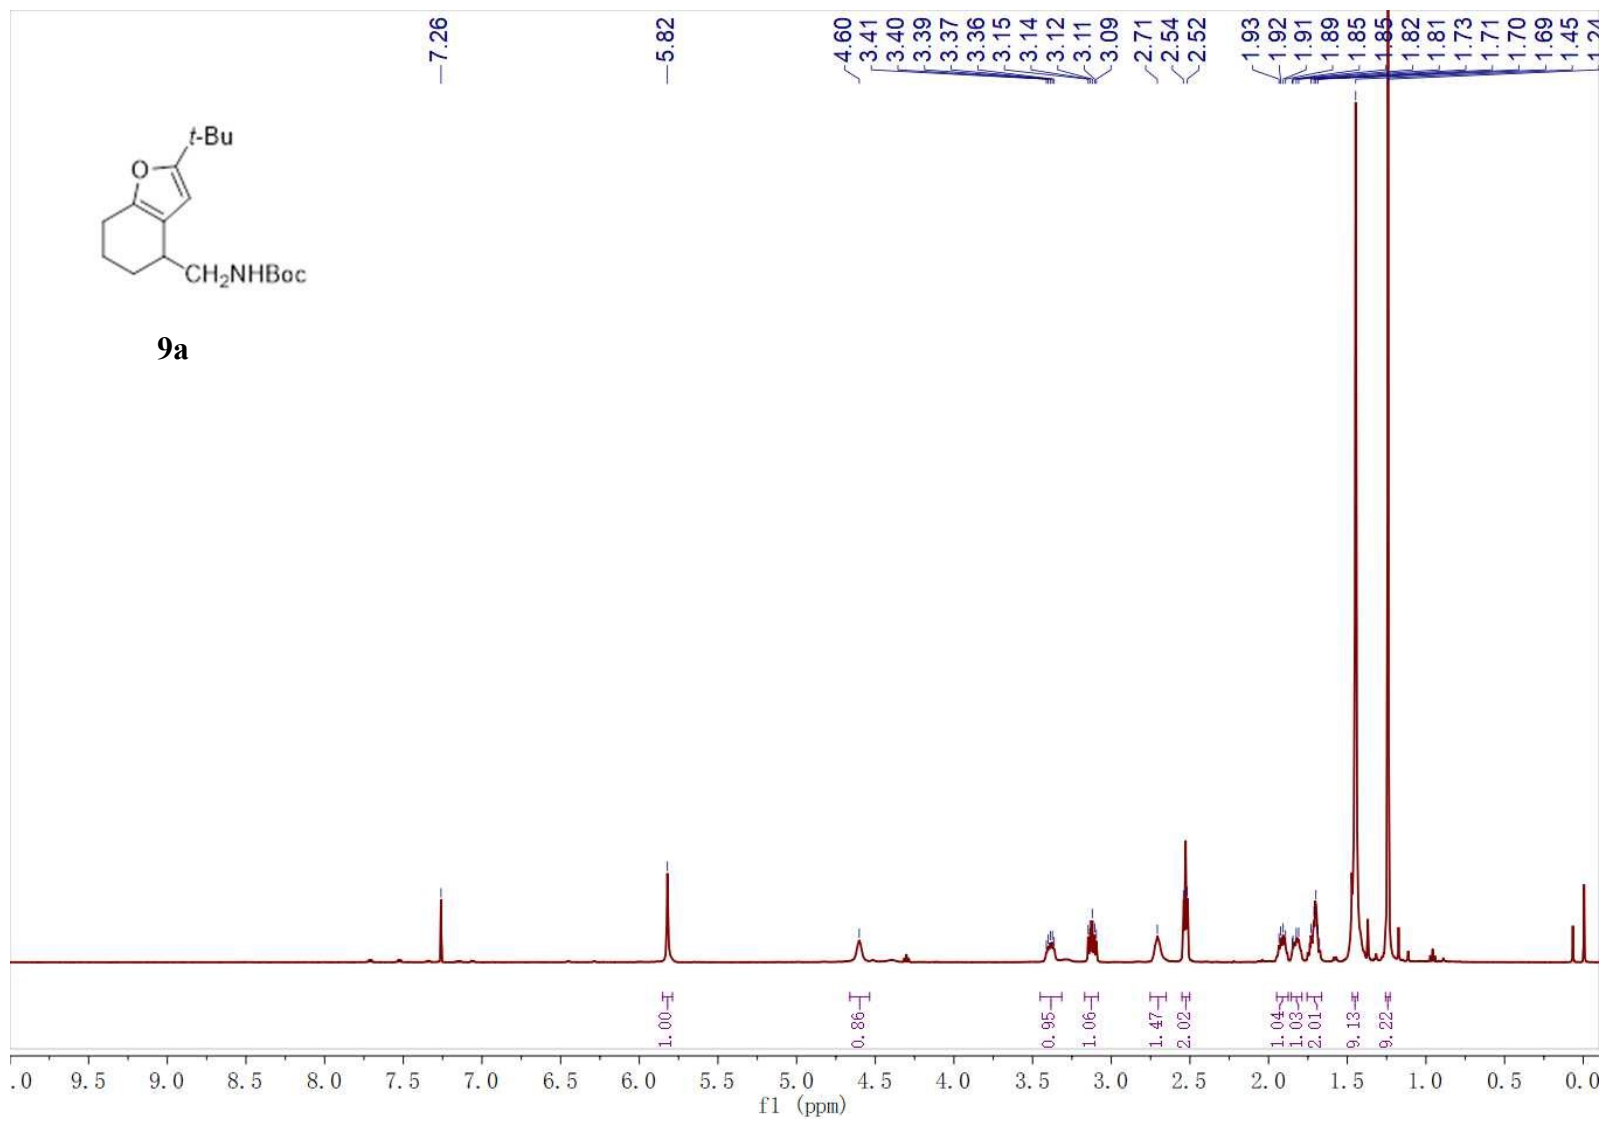

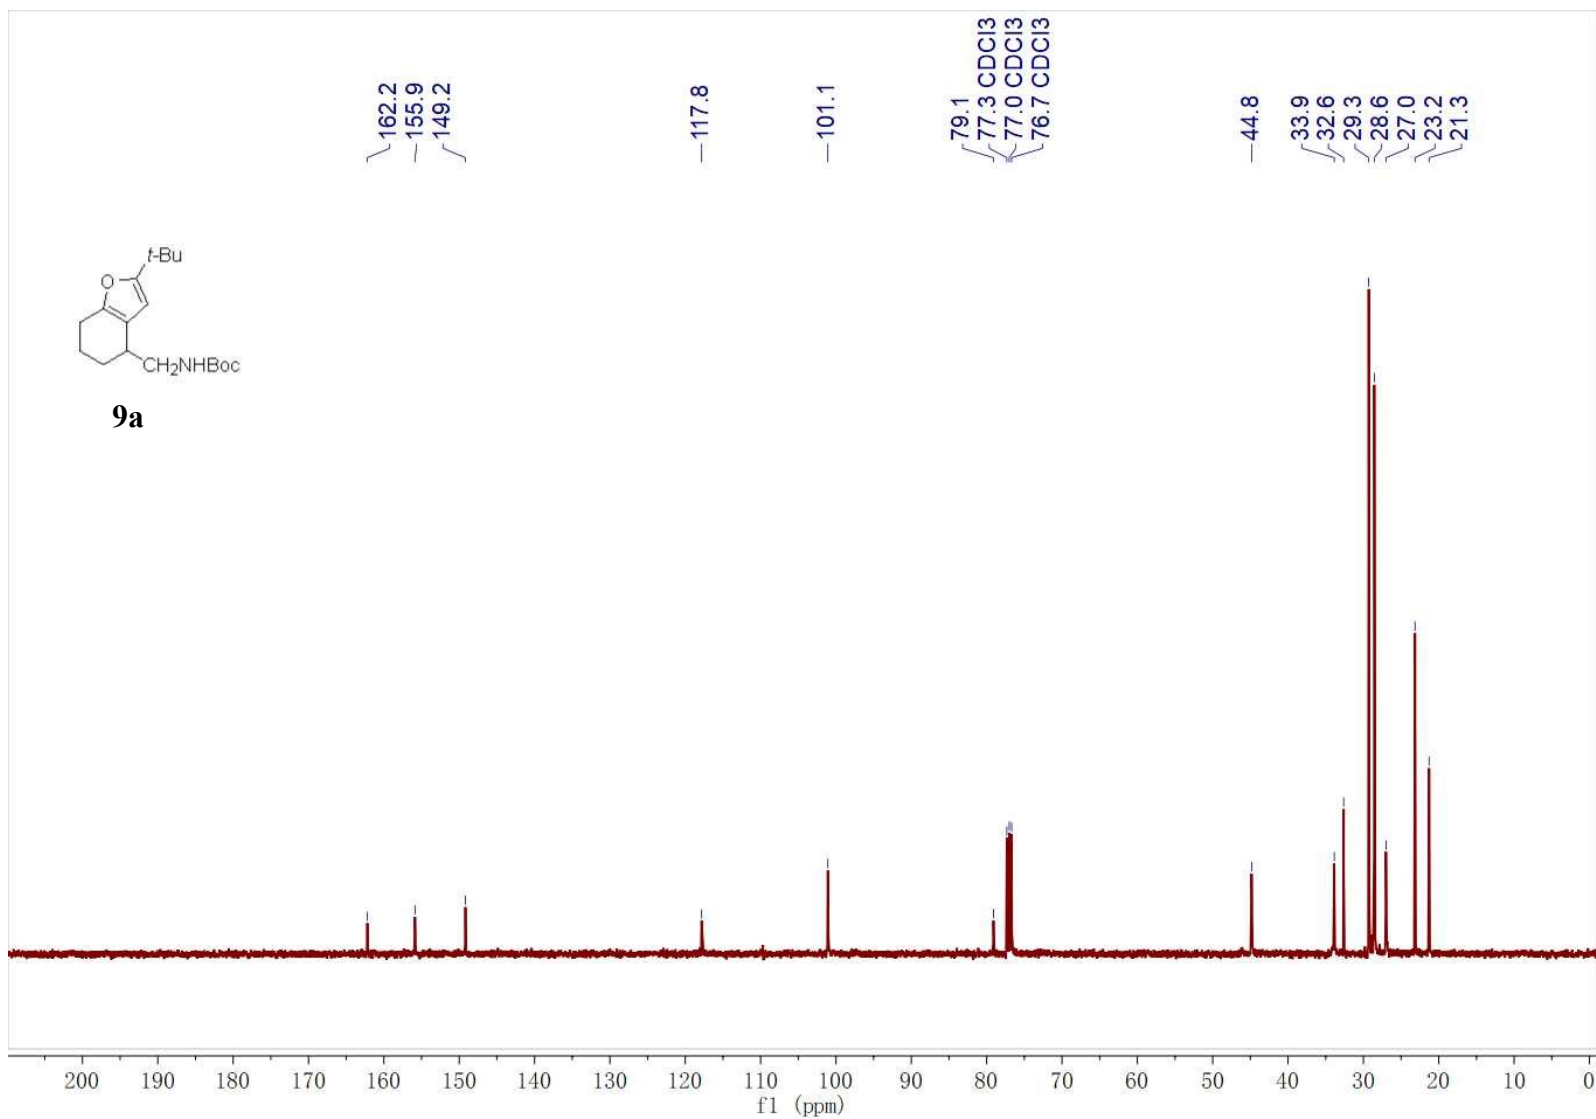



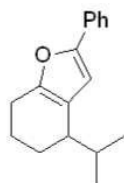

**9b**

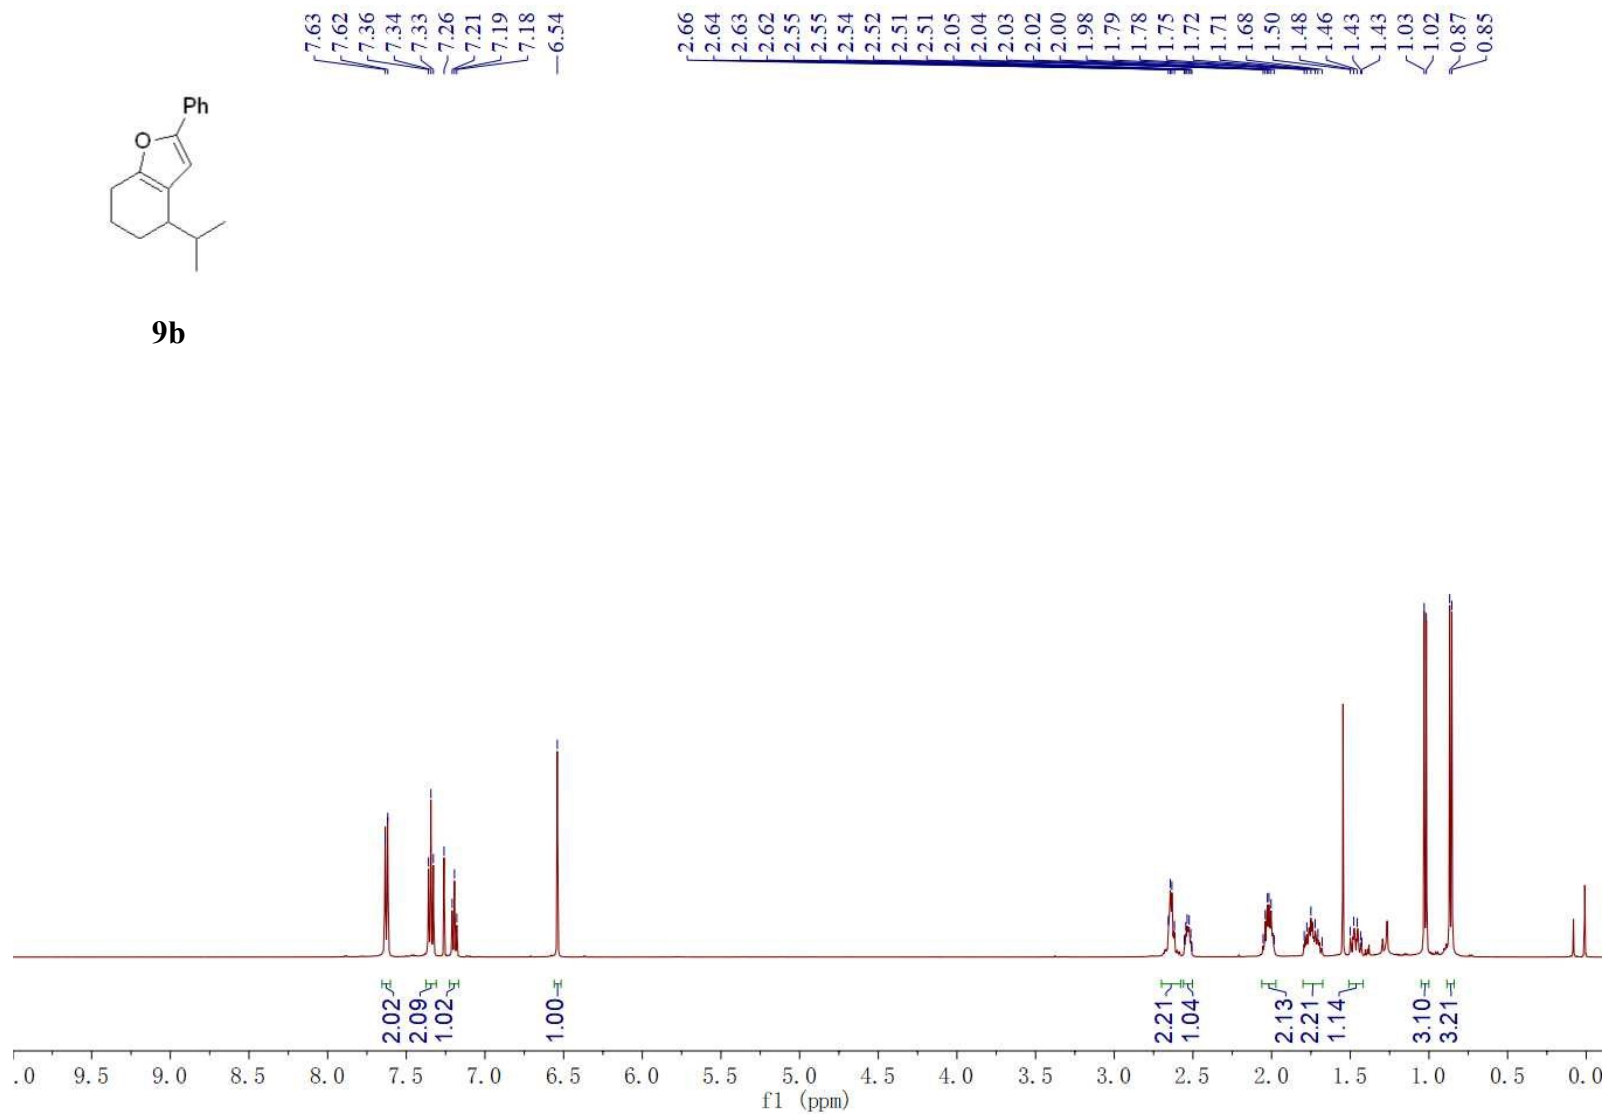

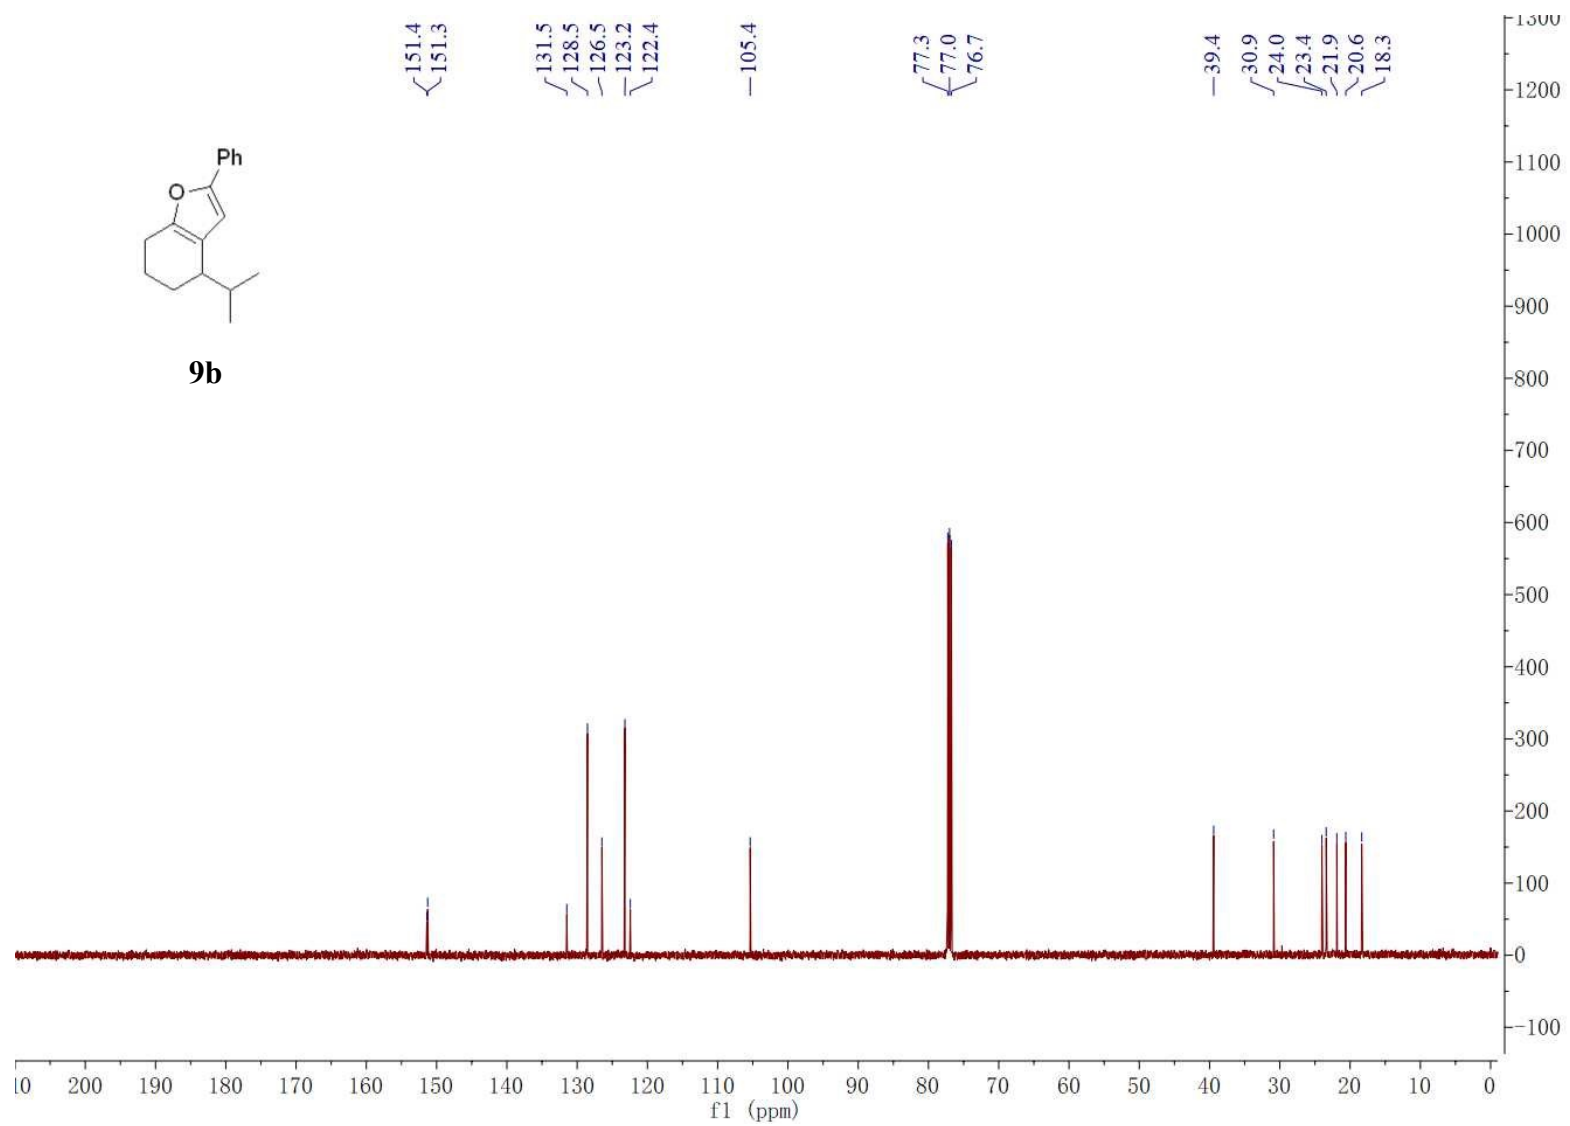

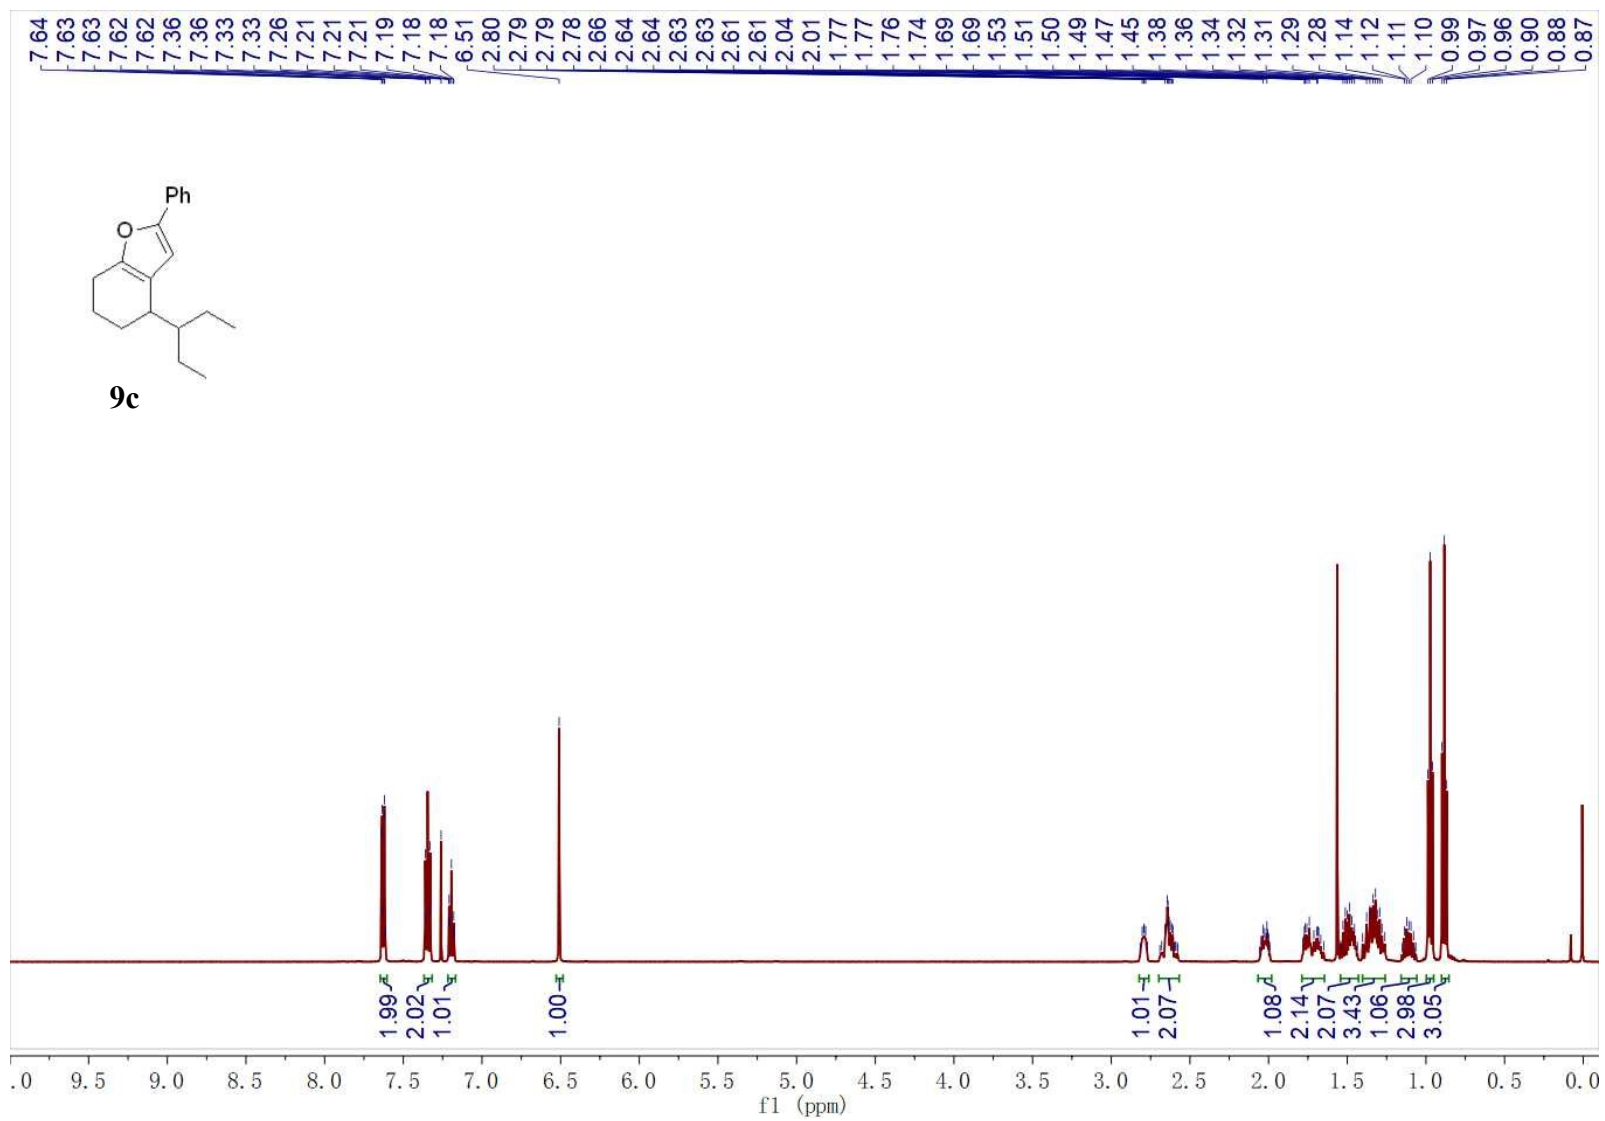

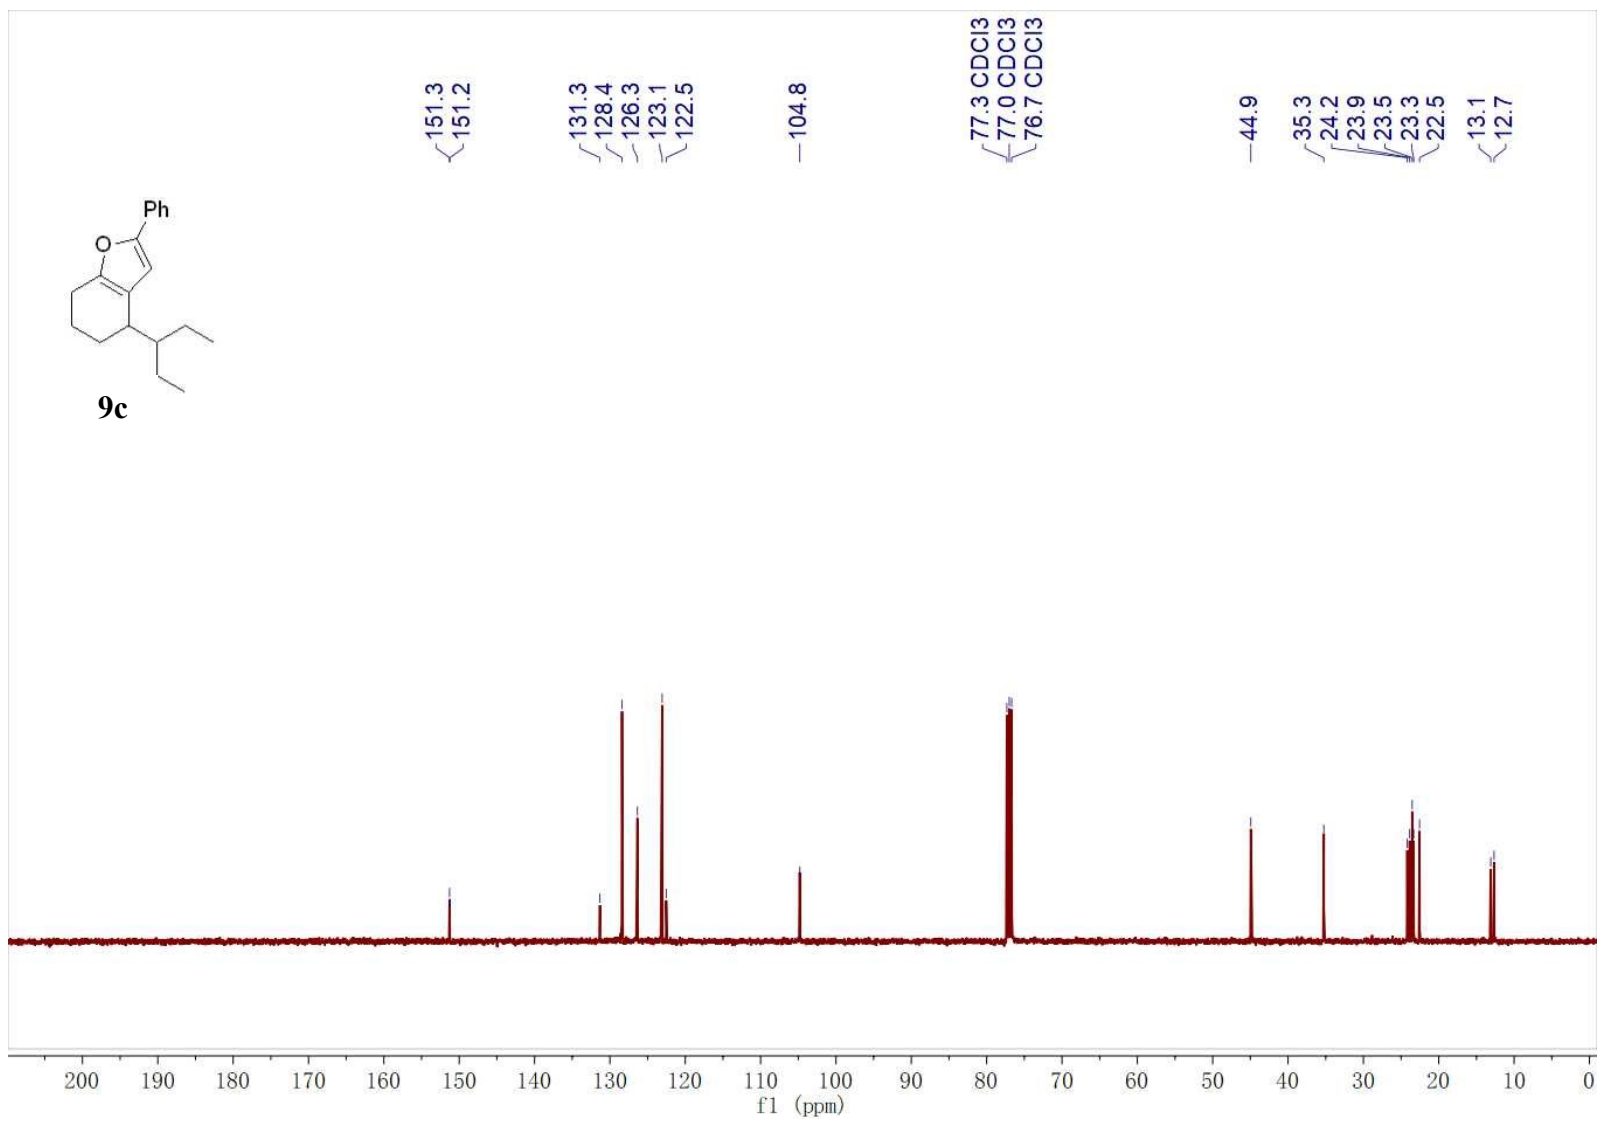

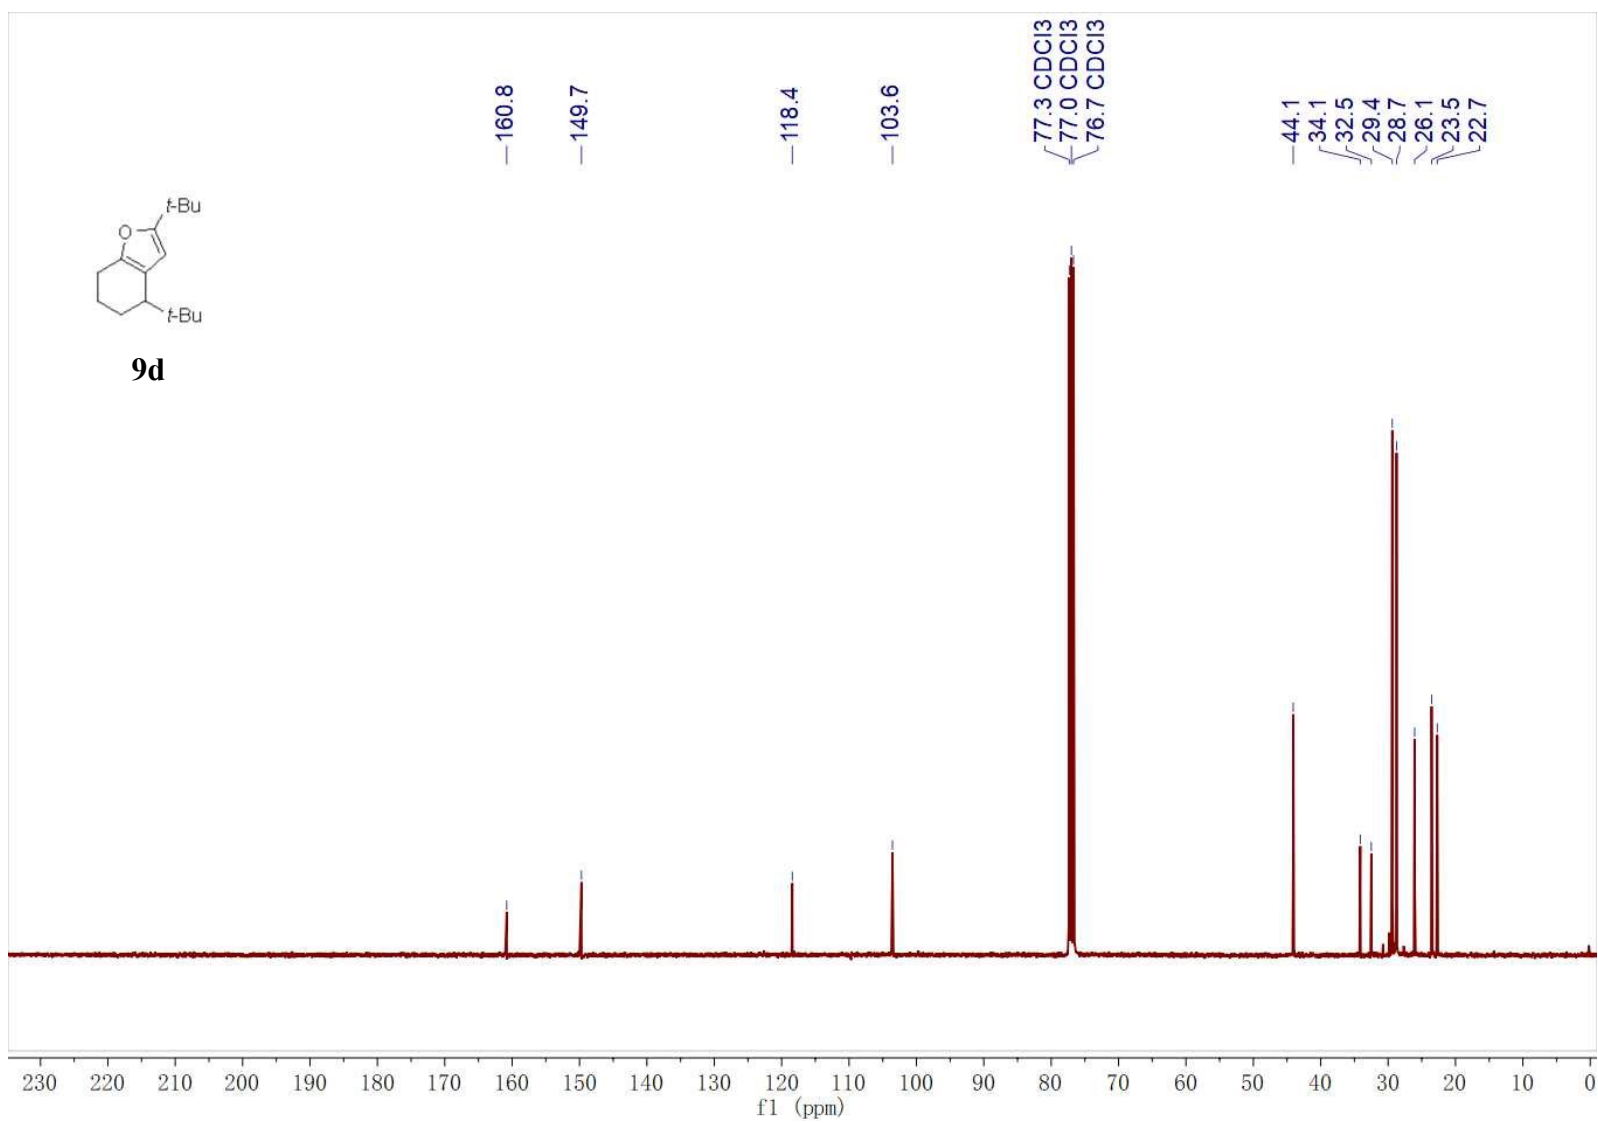

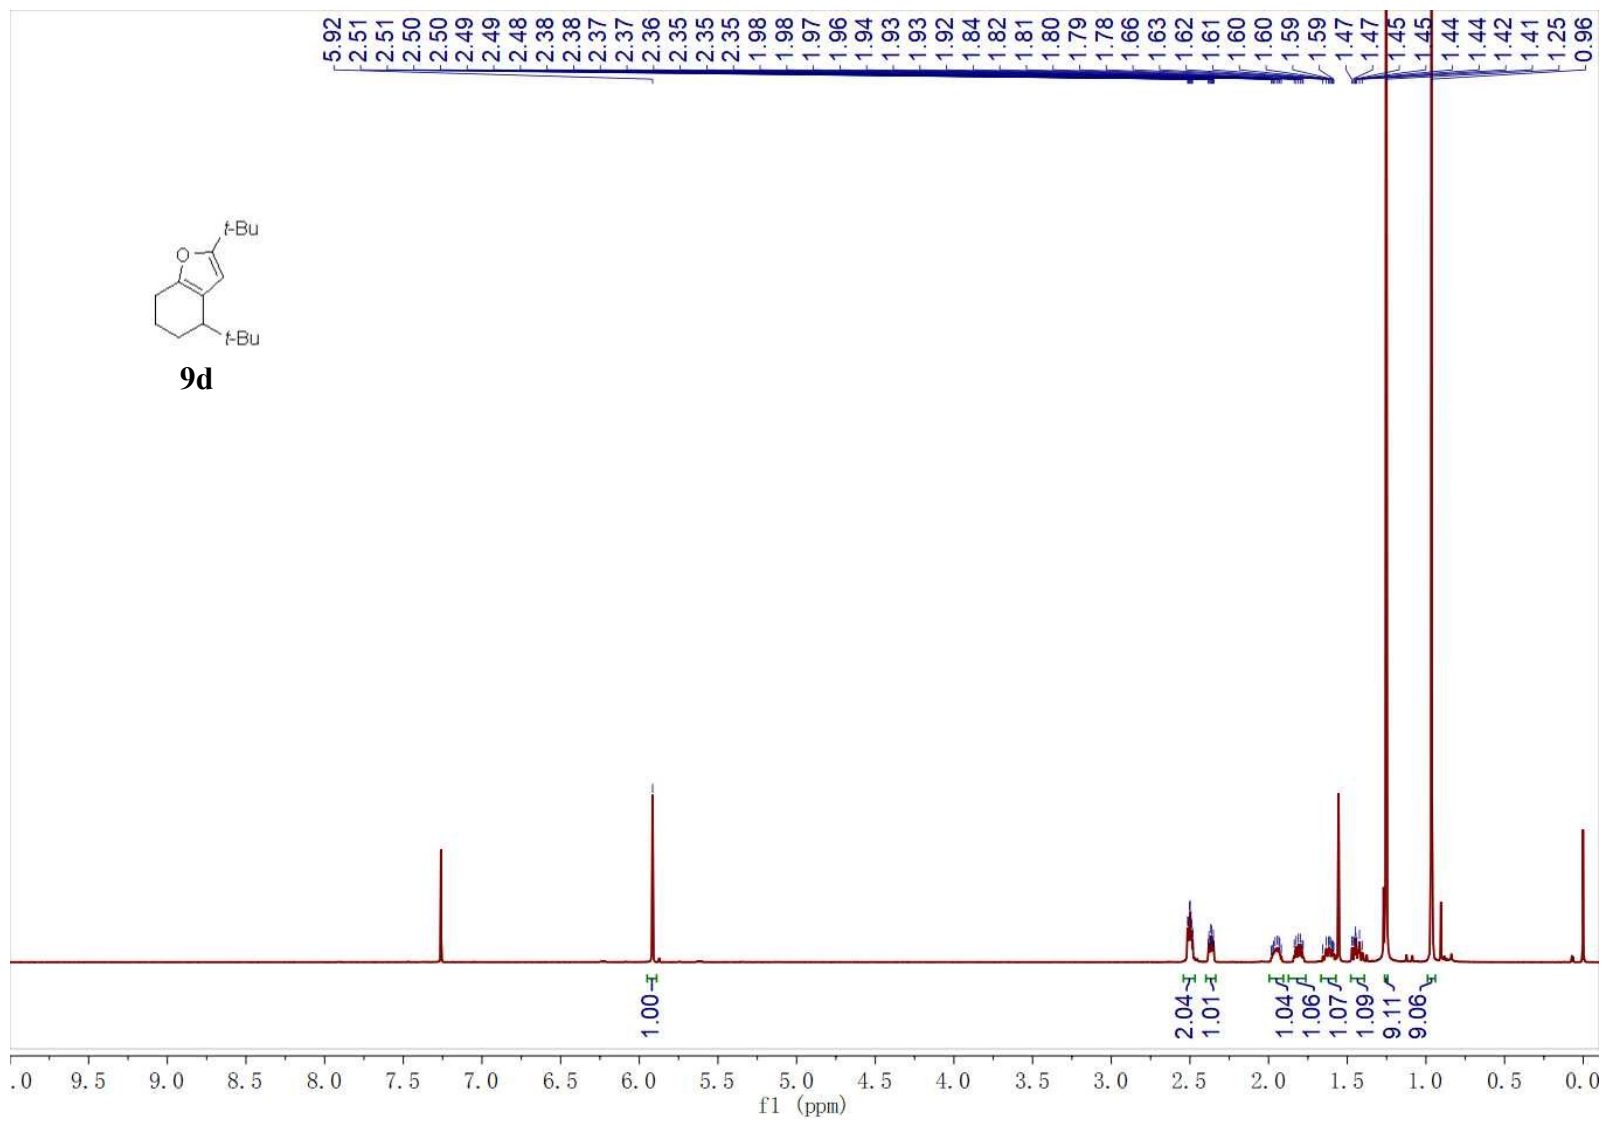

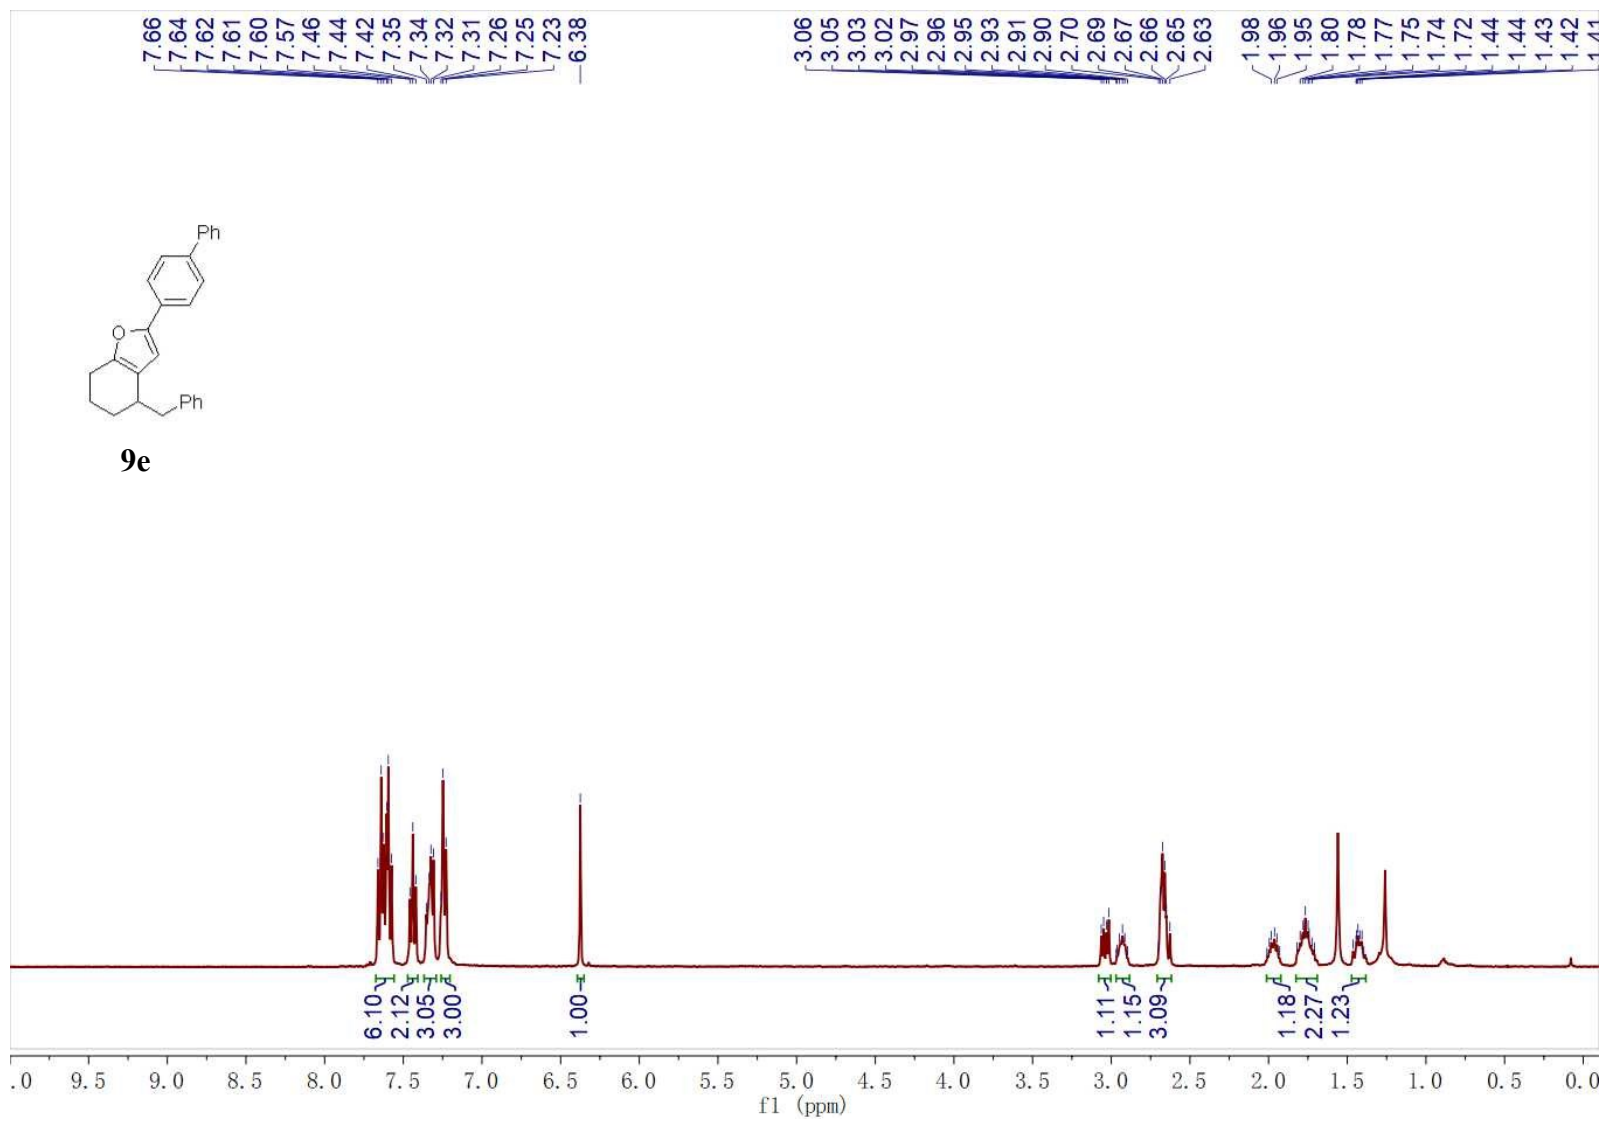

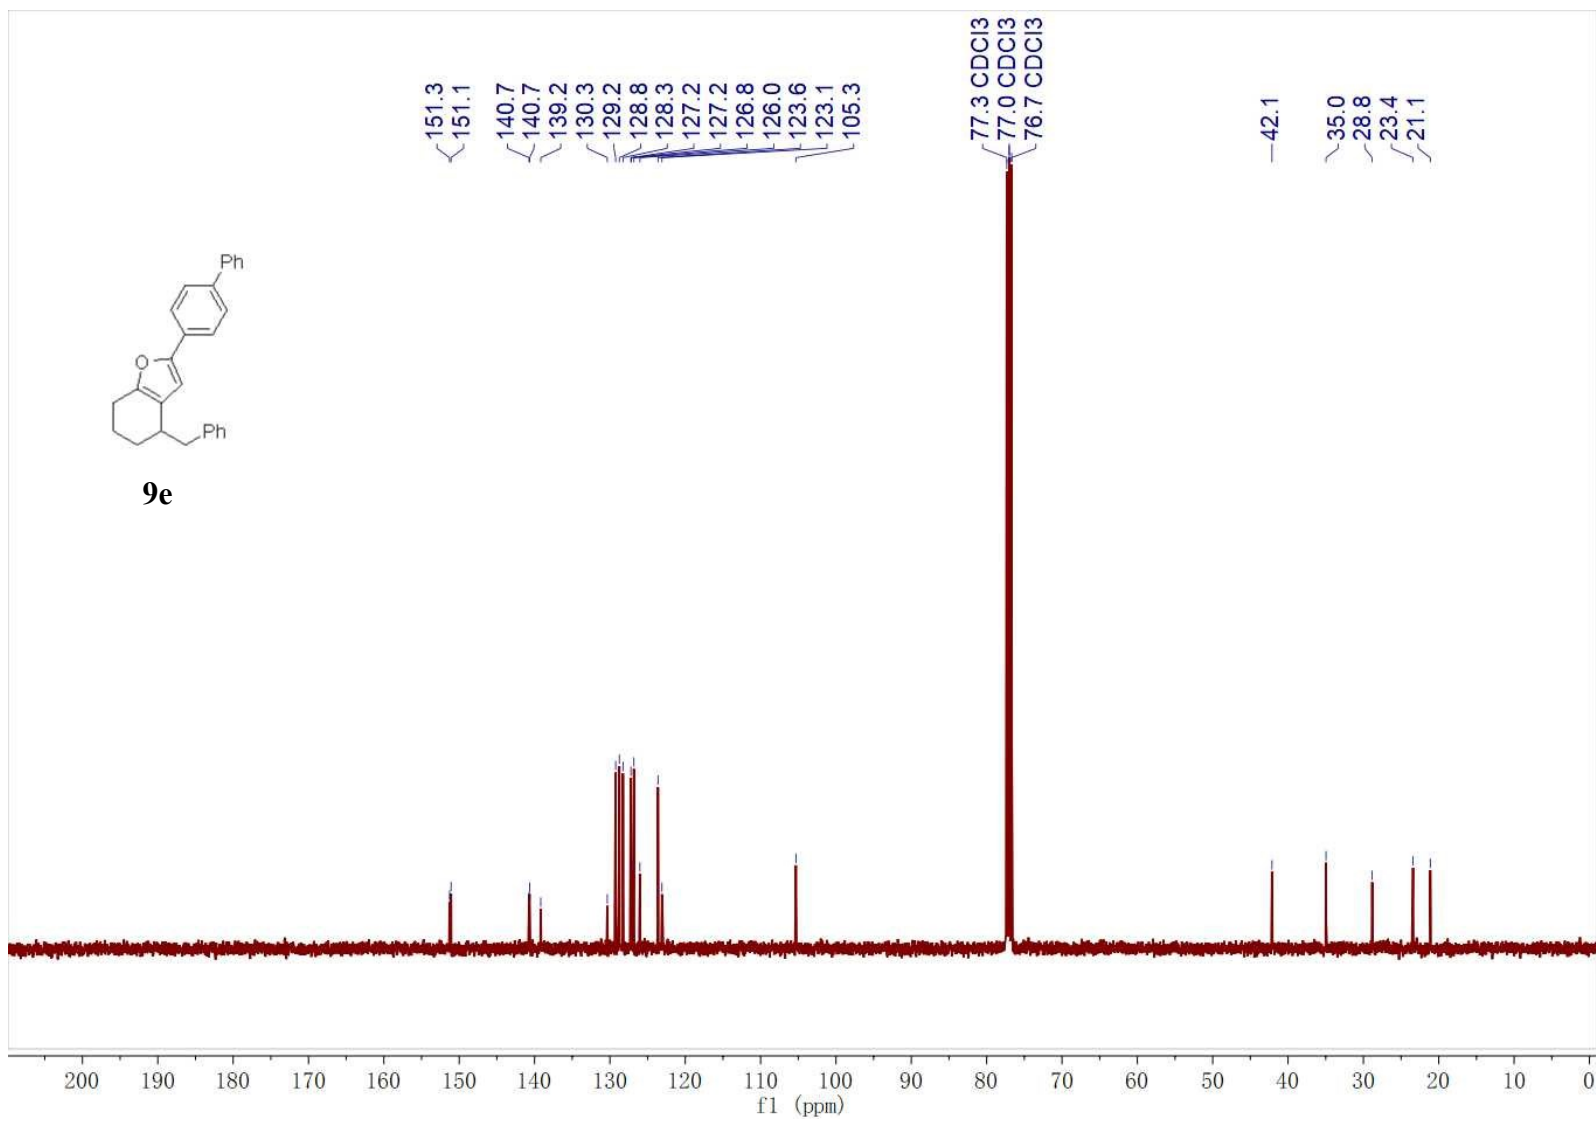



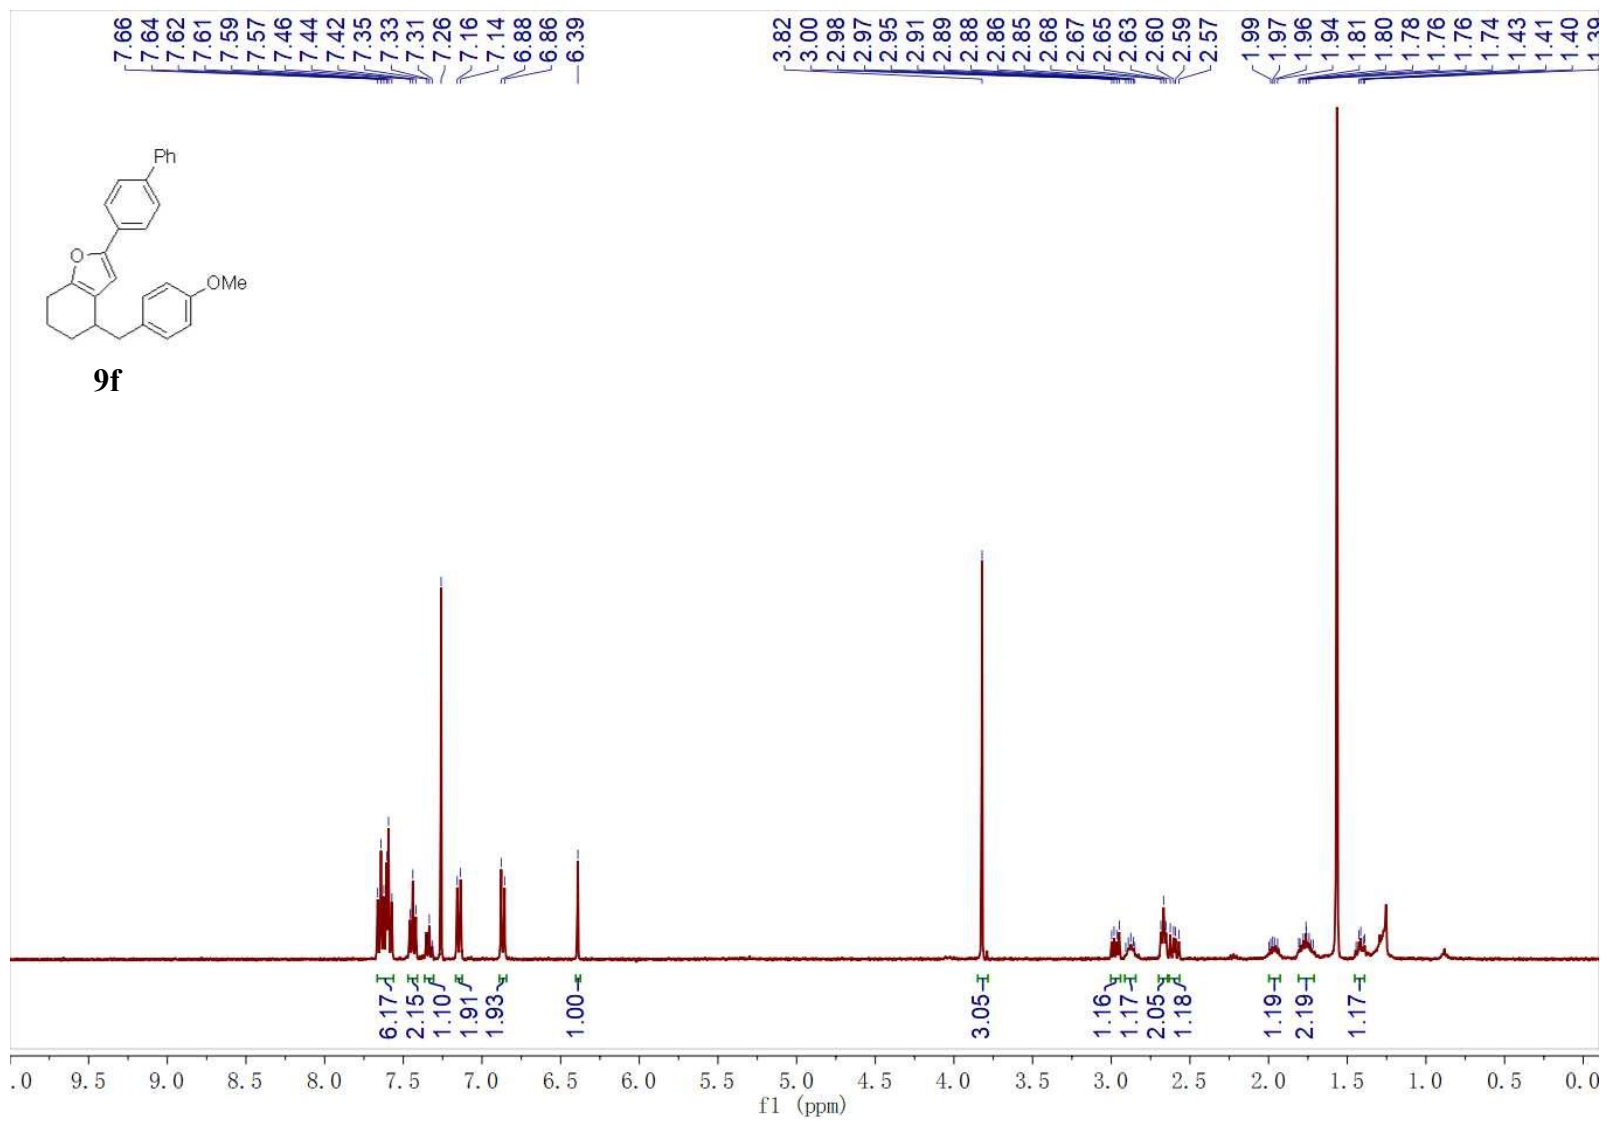

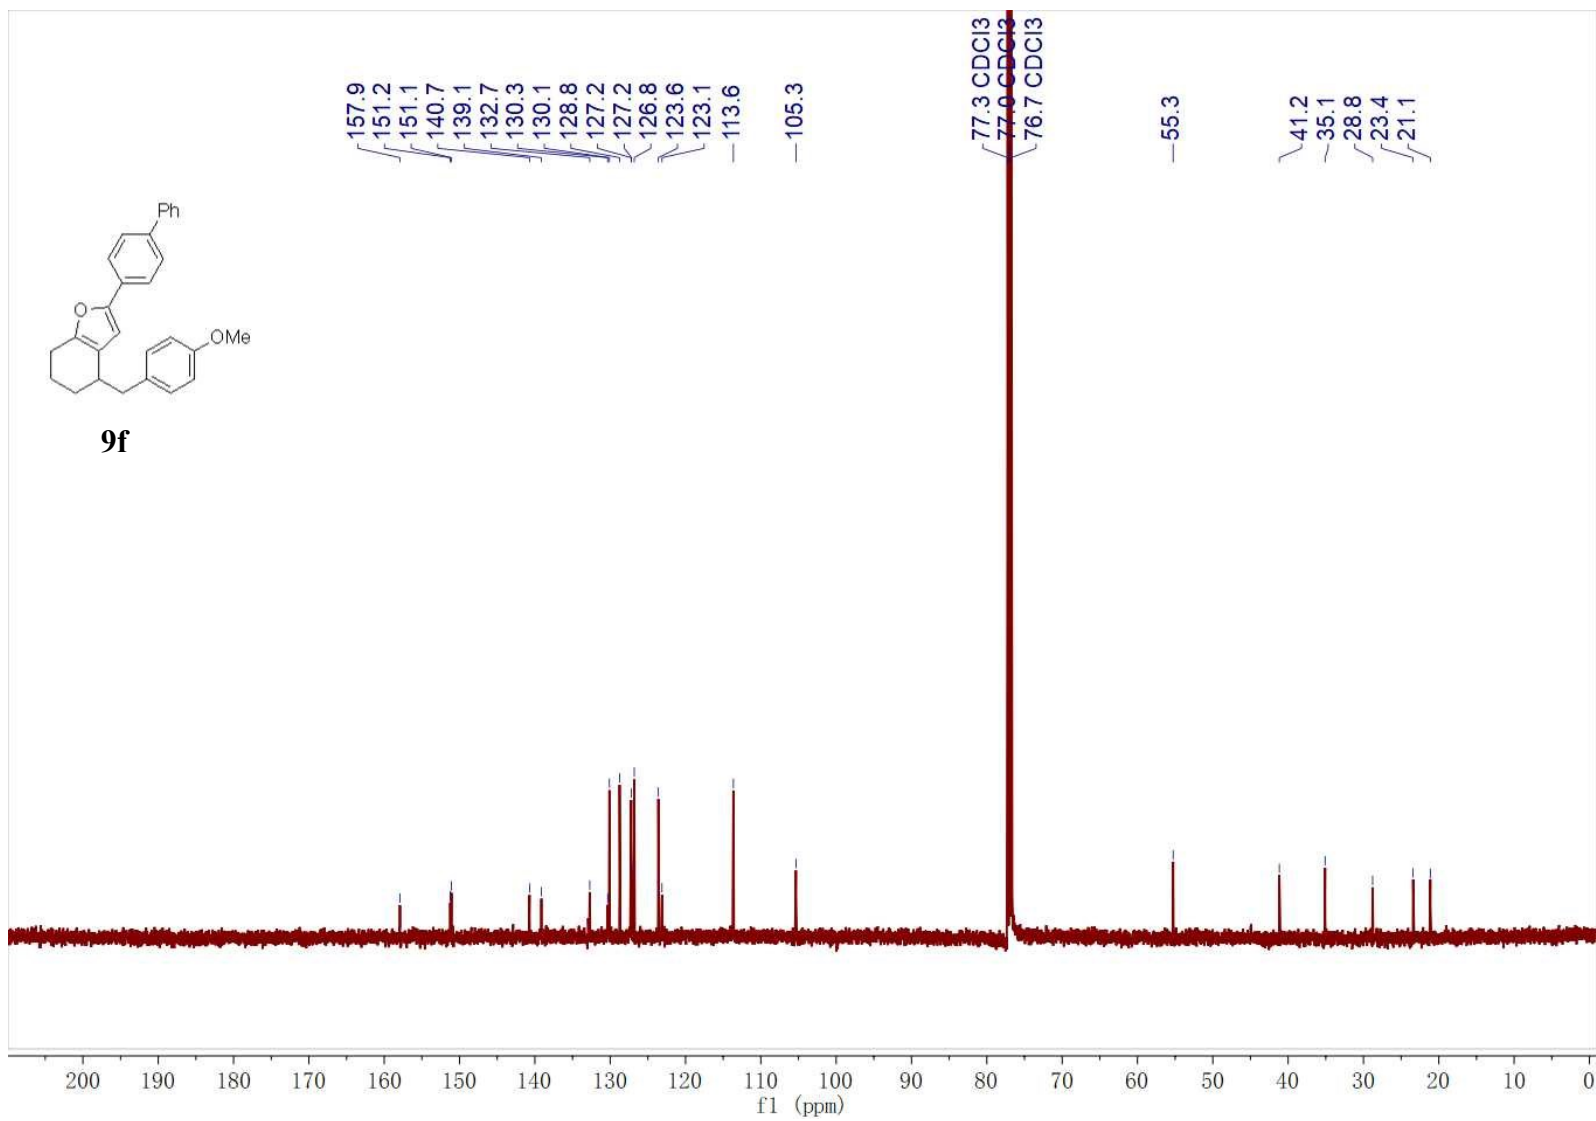

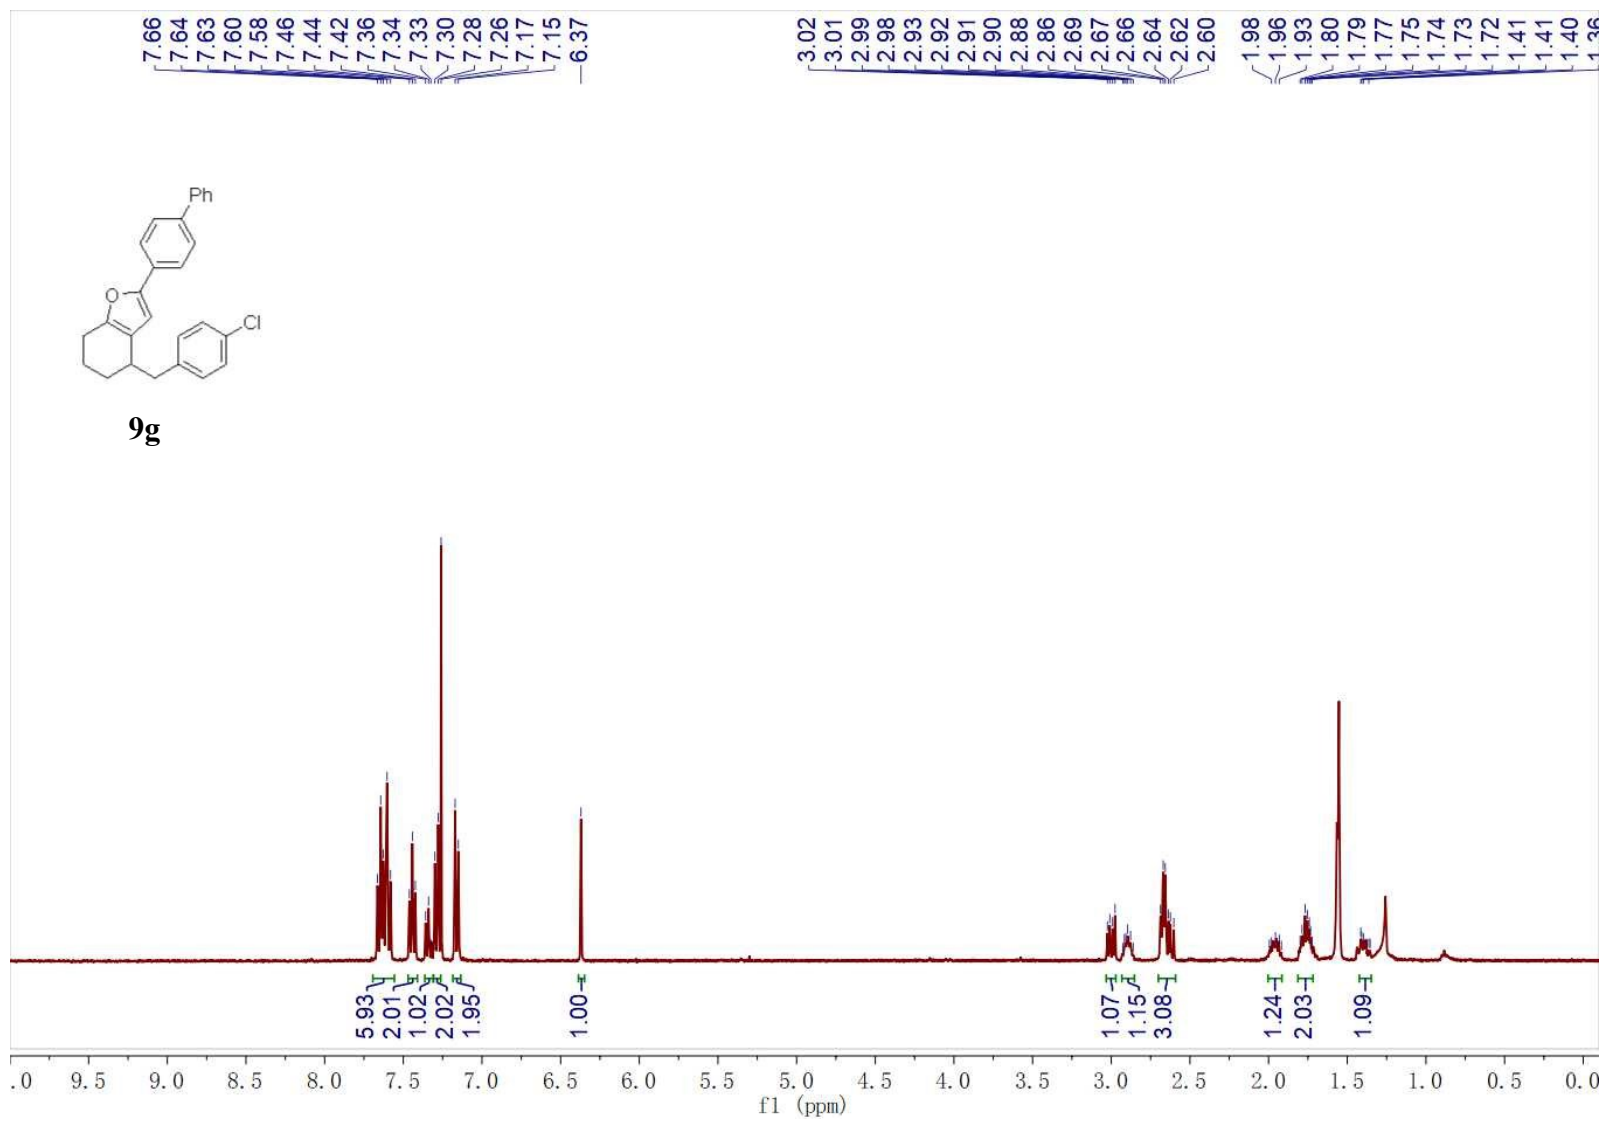

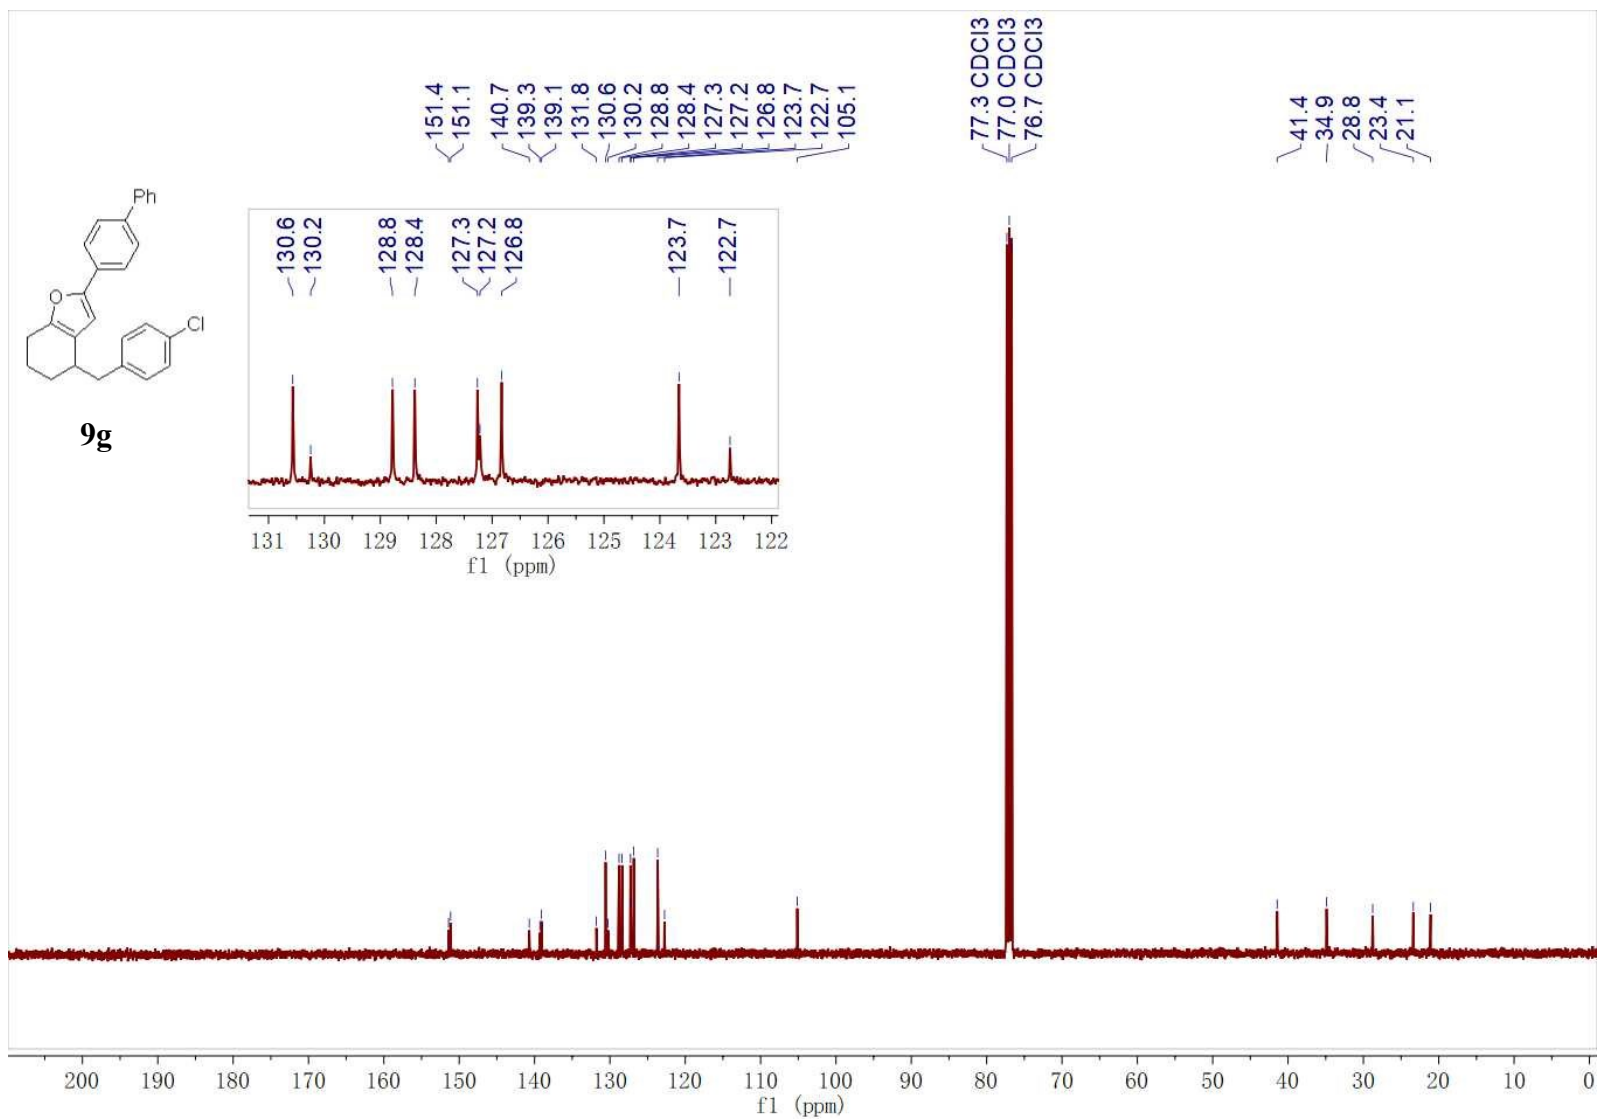

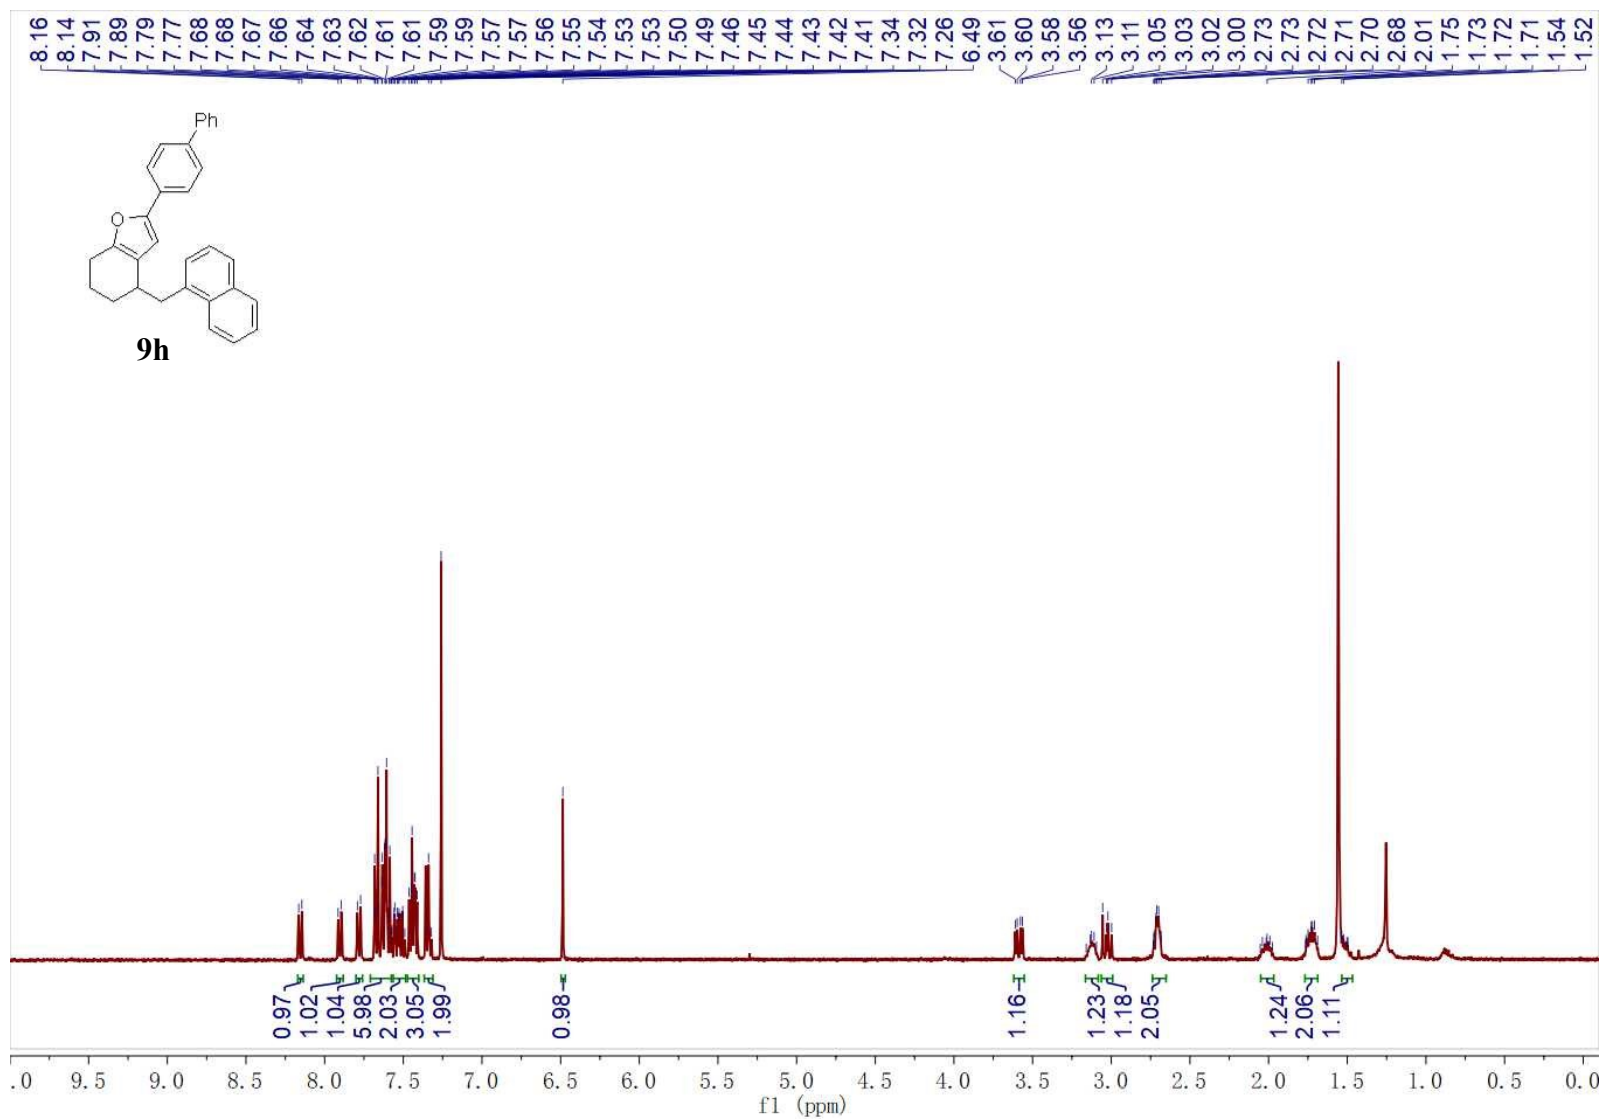

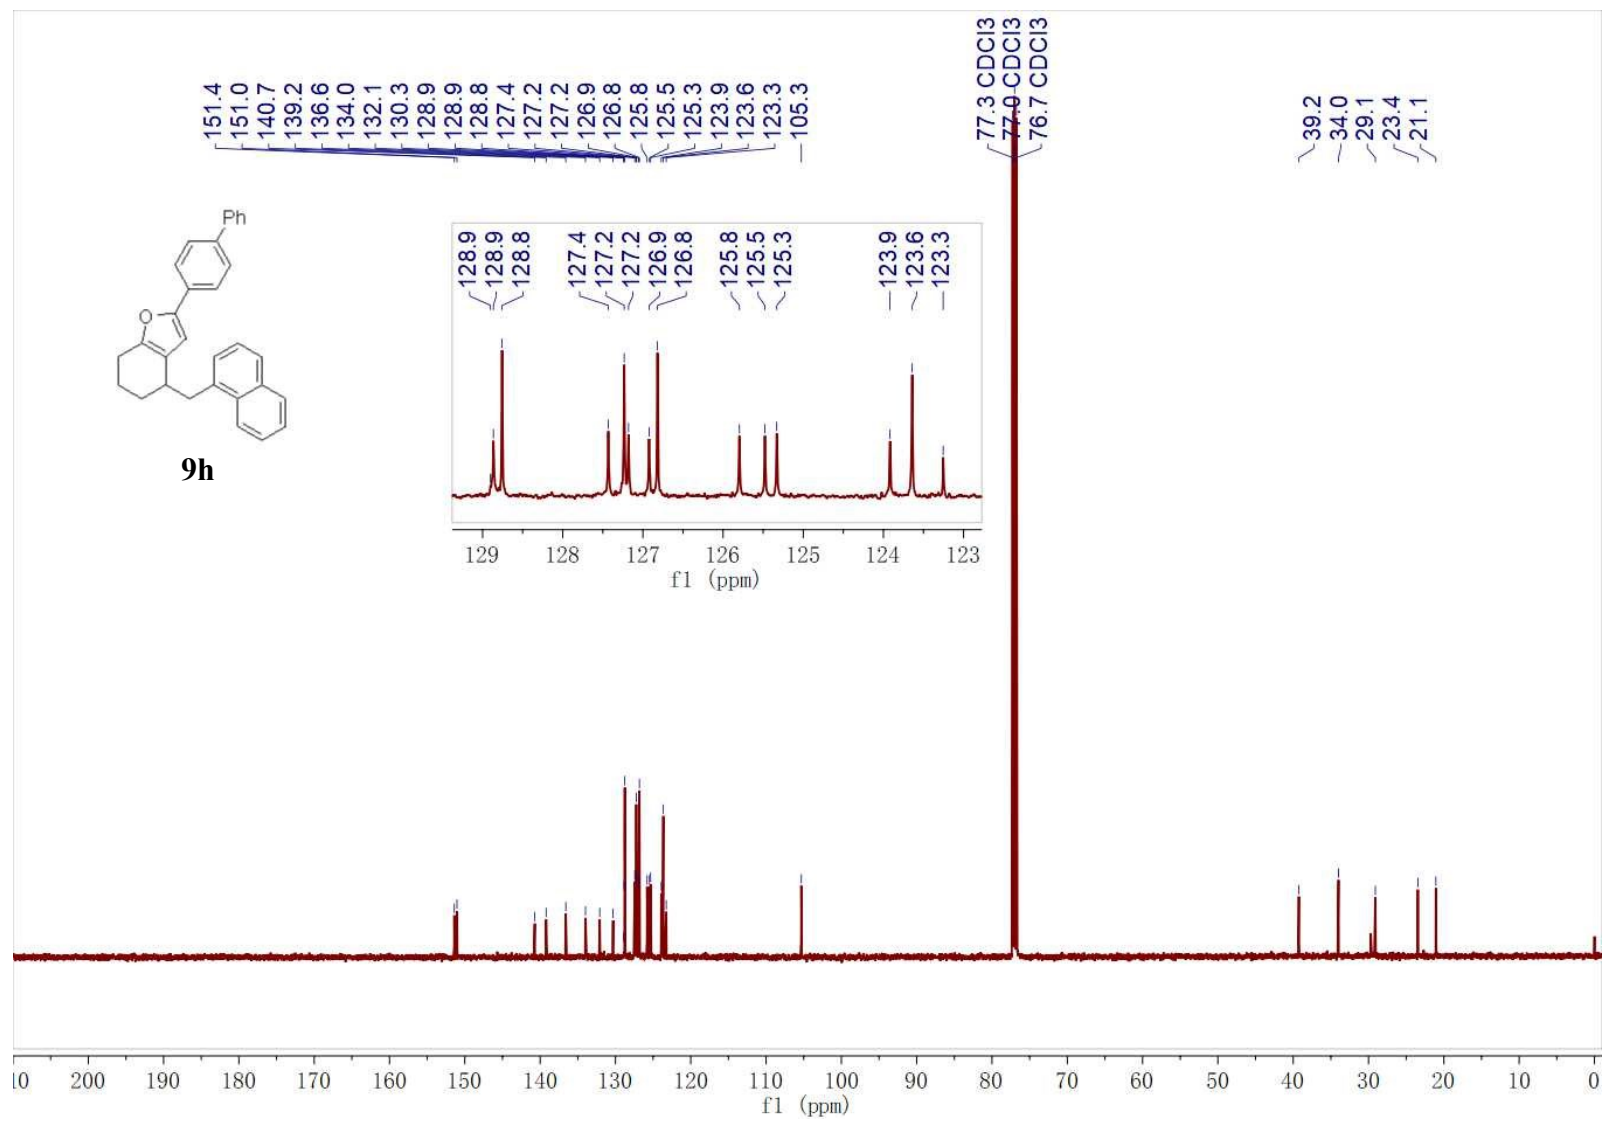

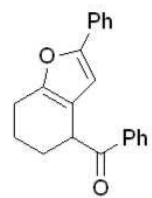

9i

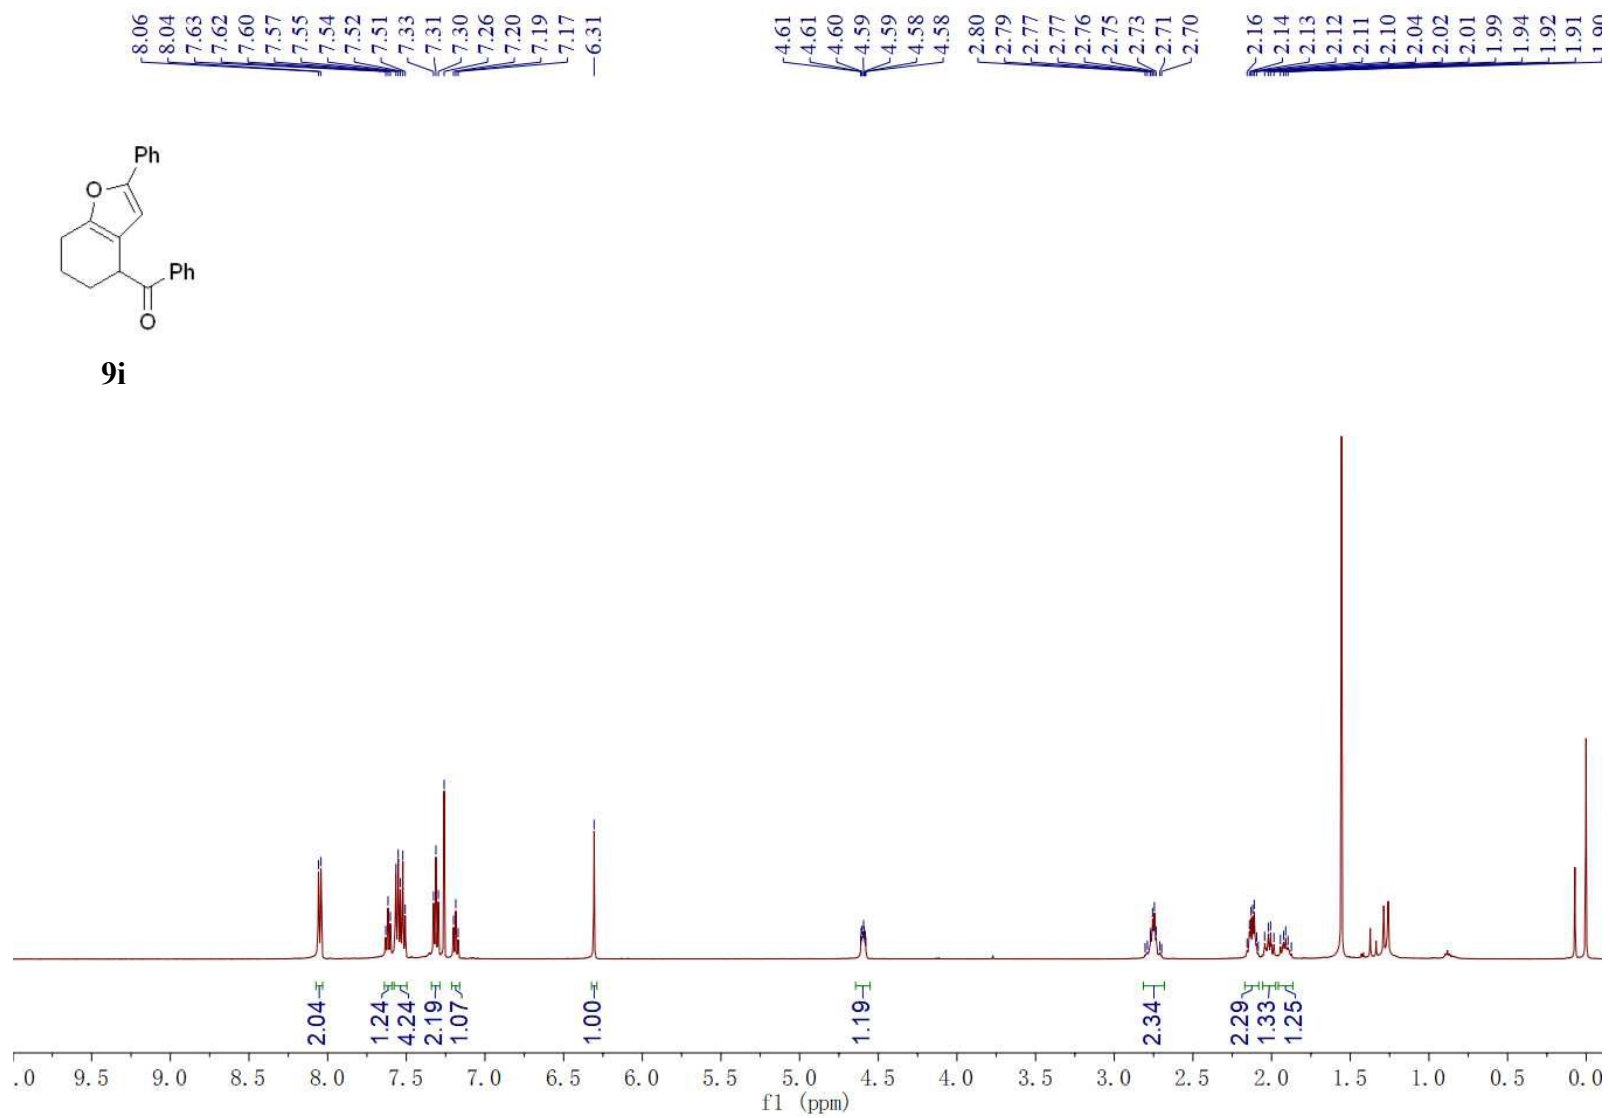

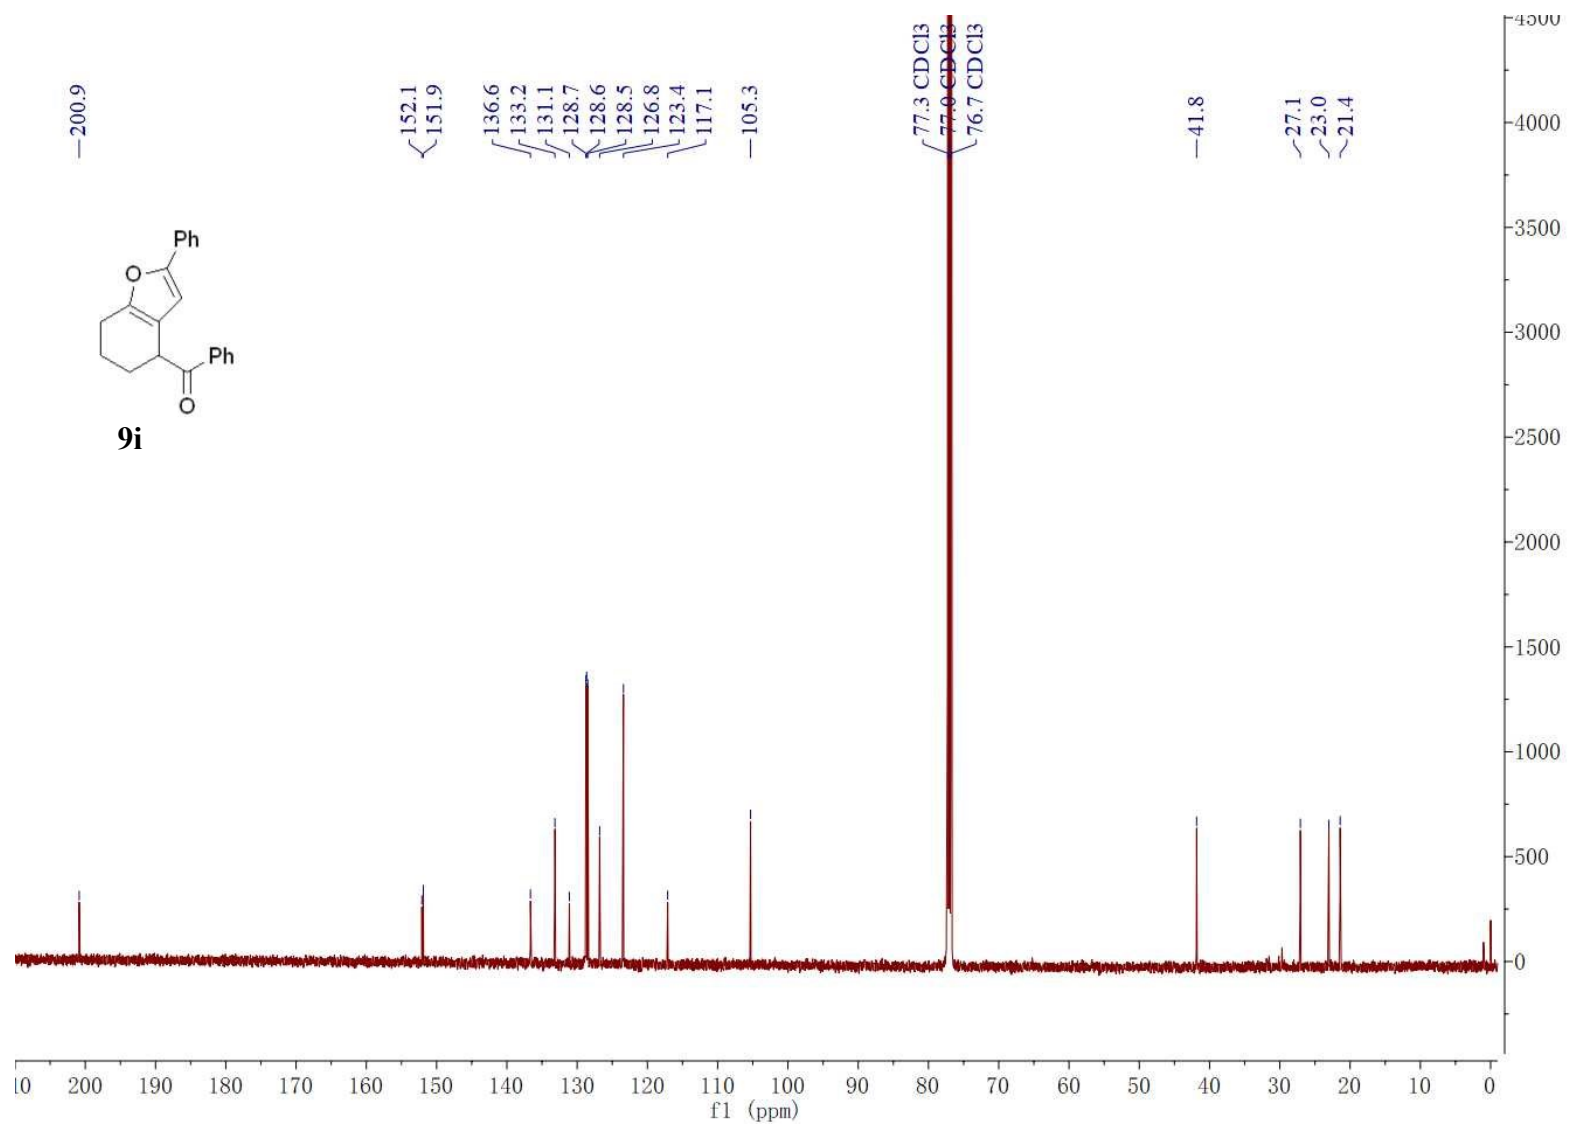



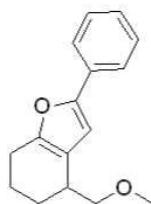

**10a**

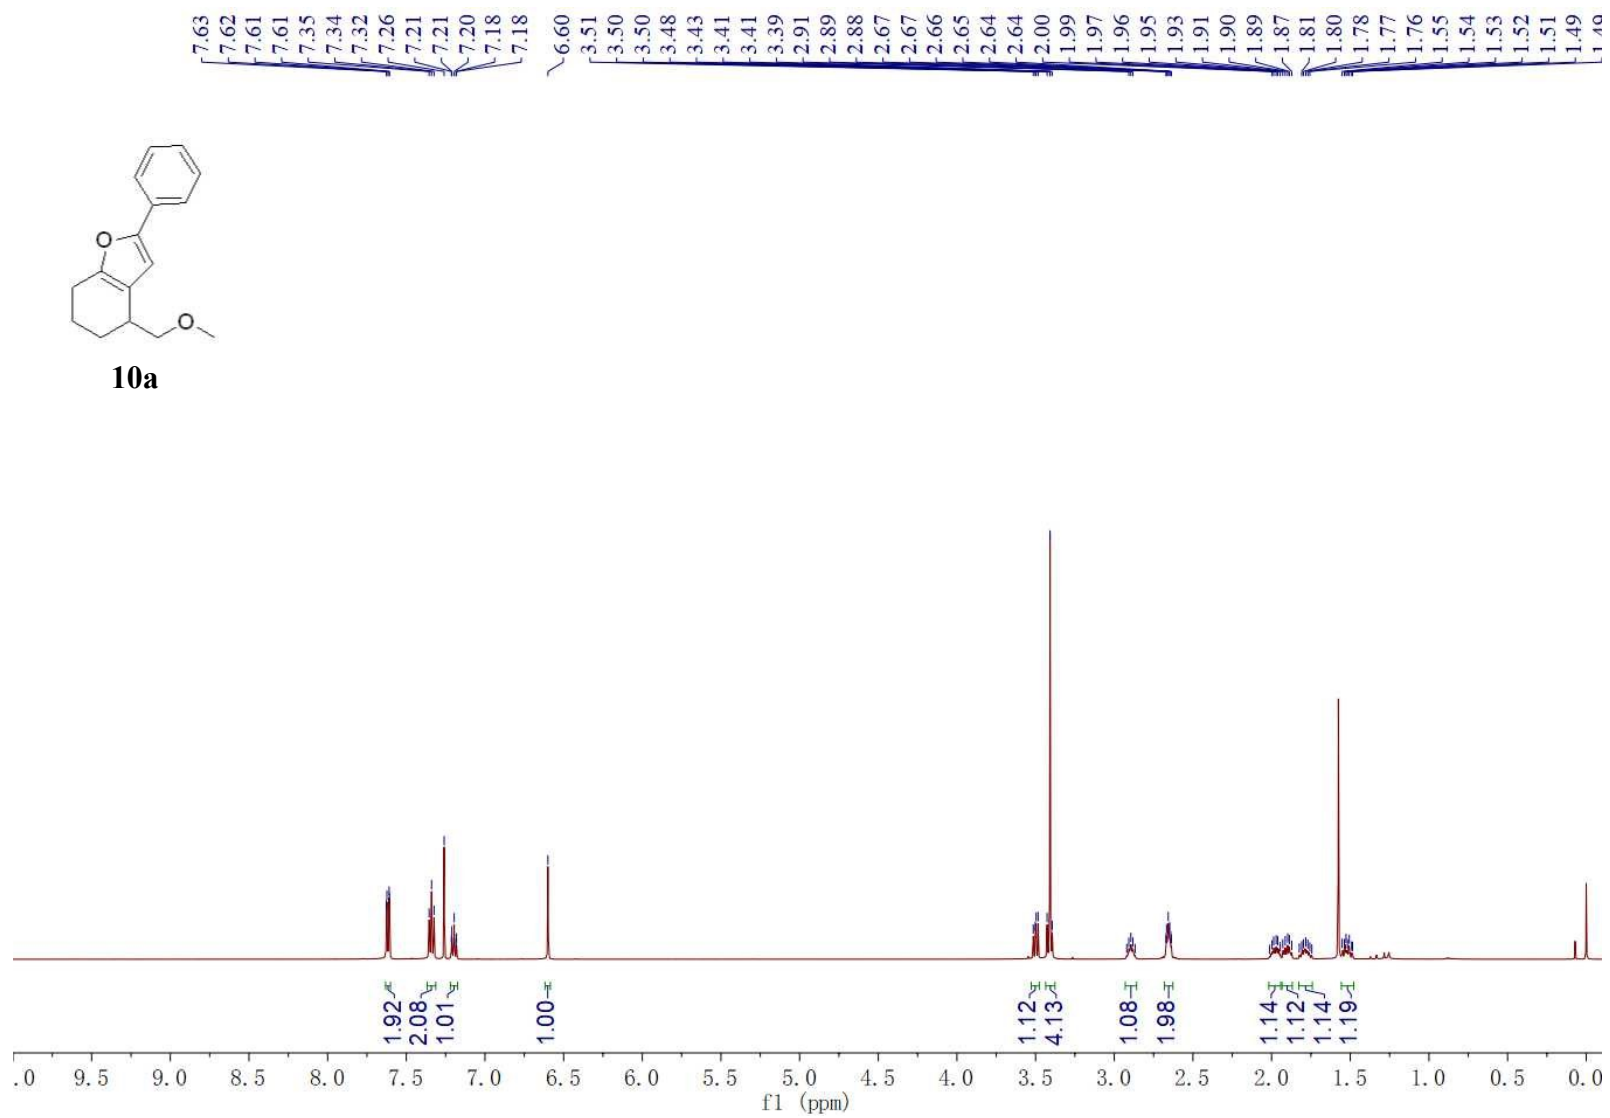

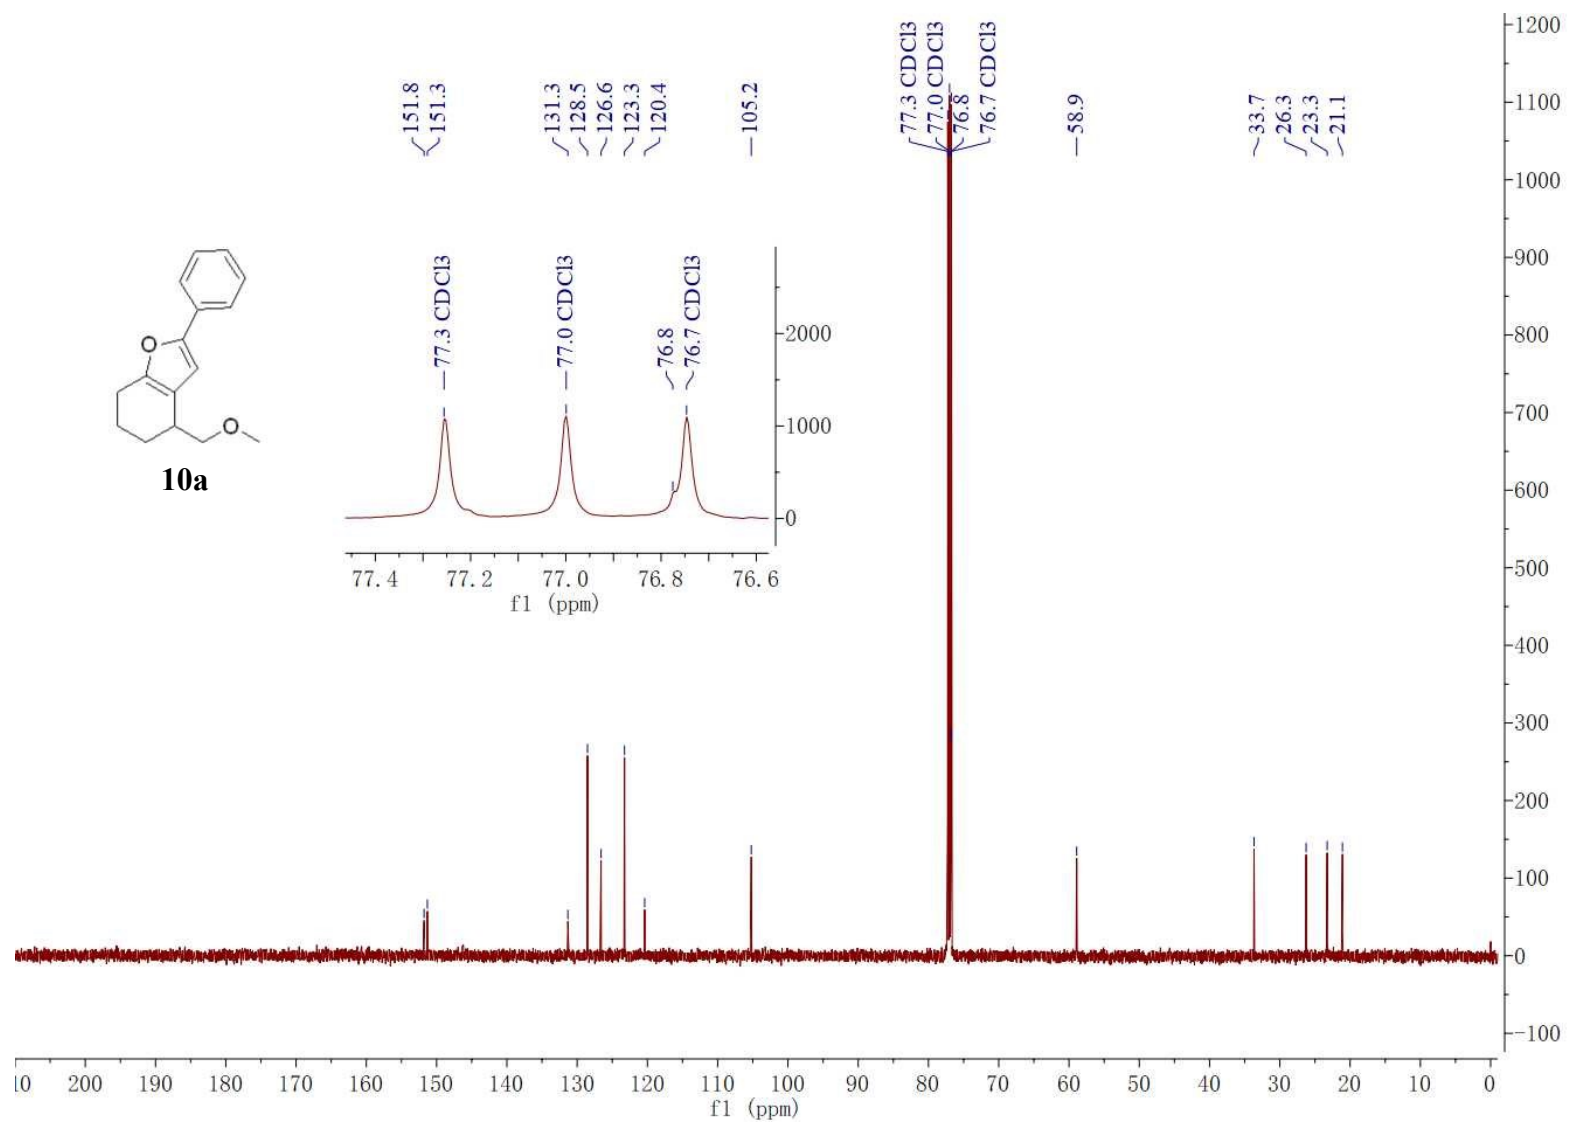

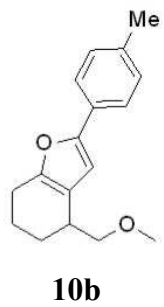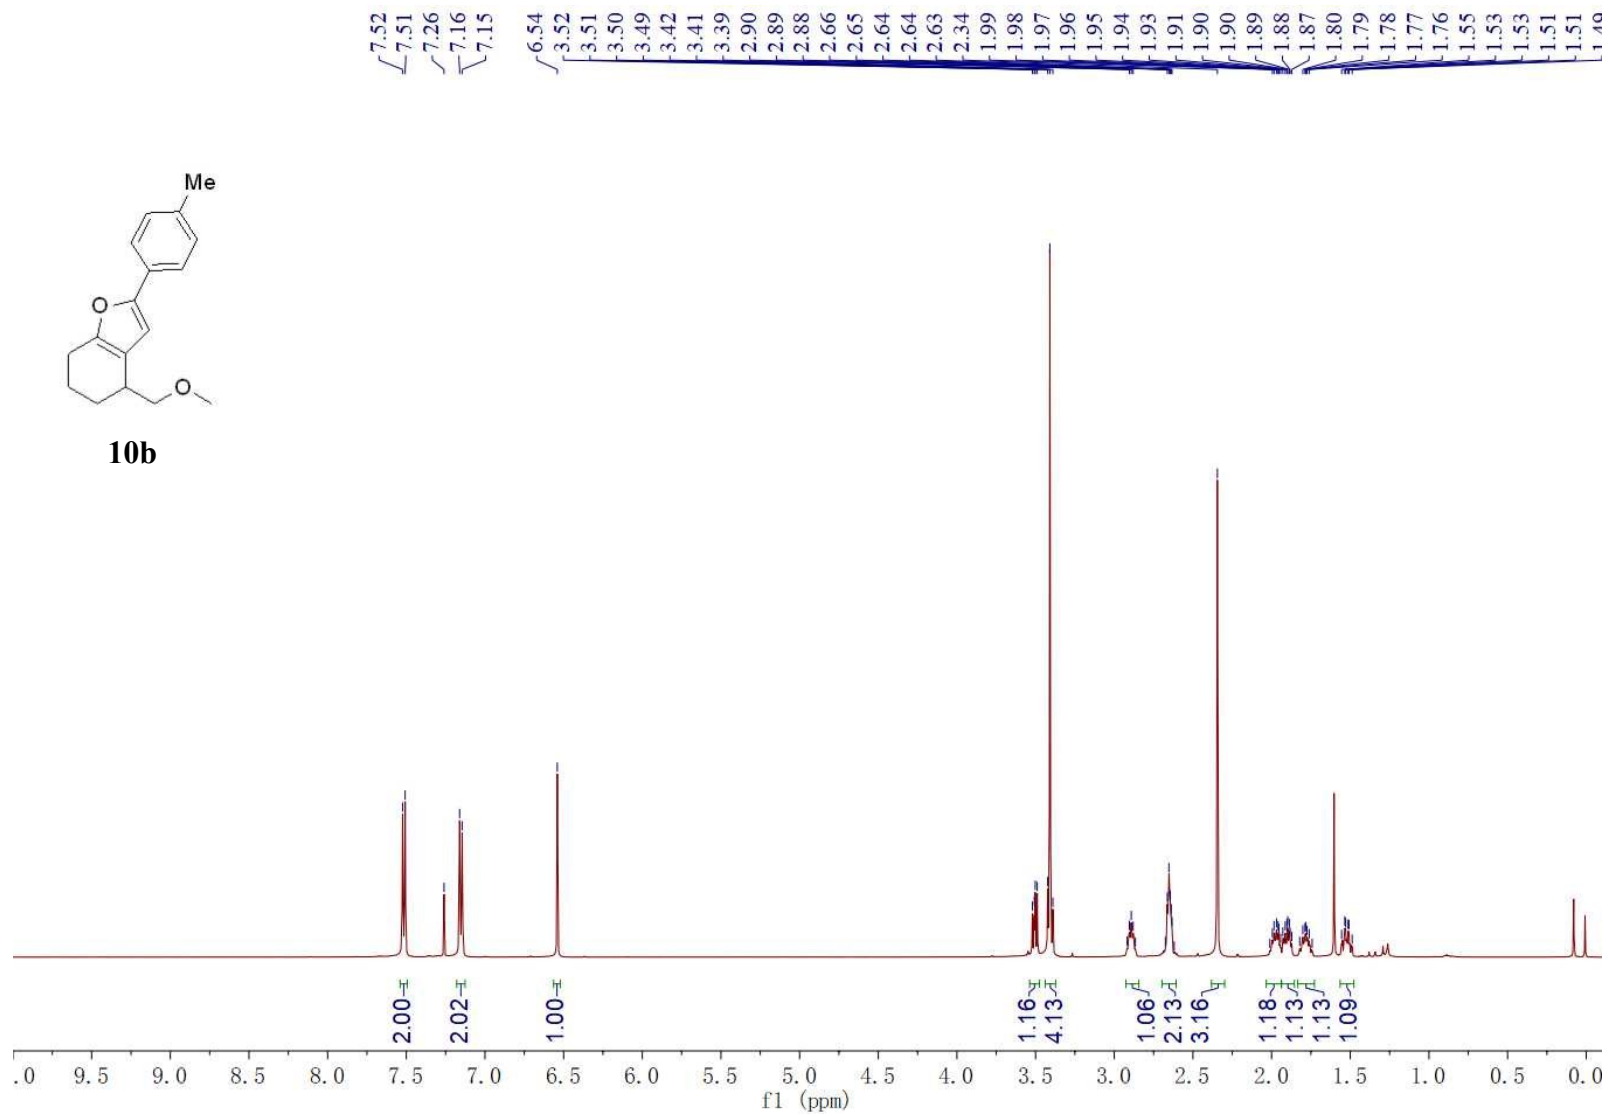

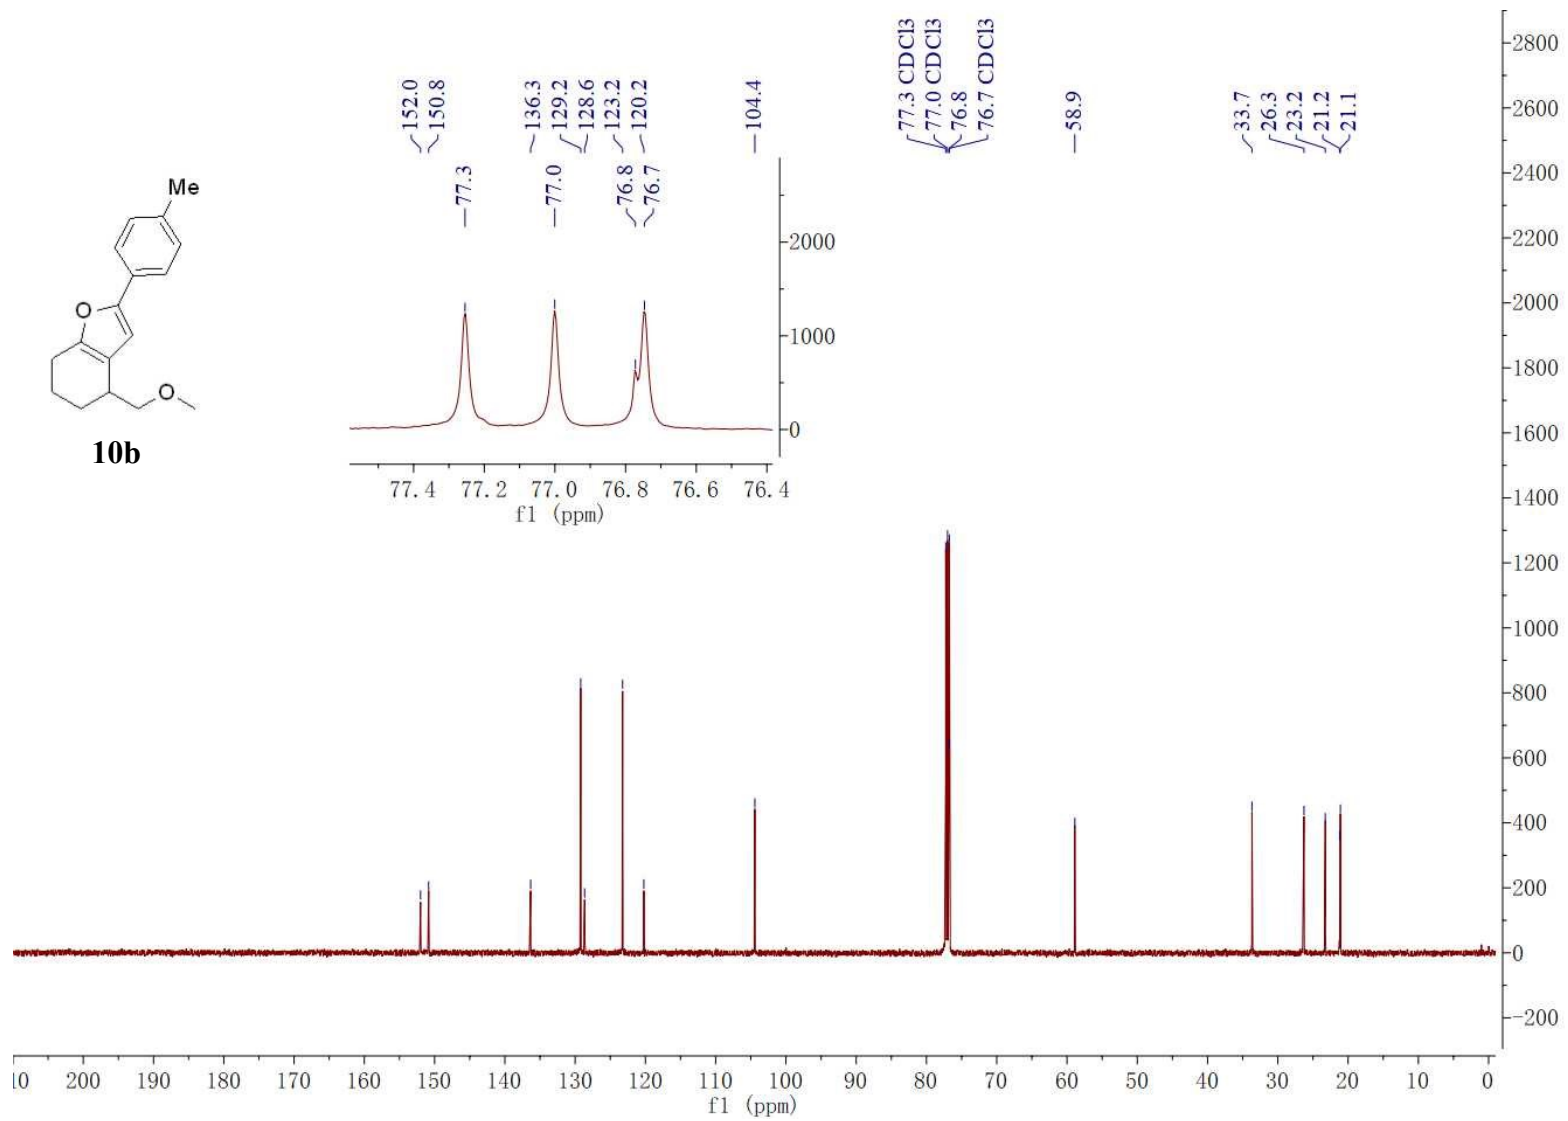

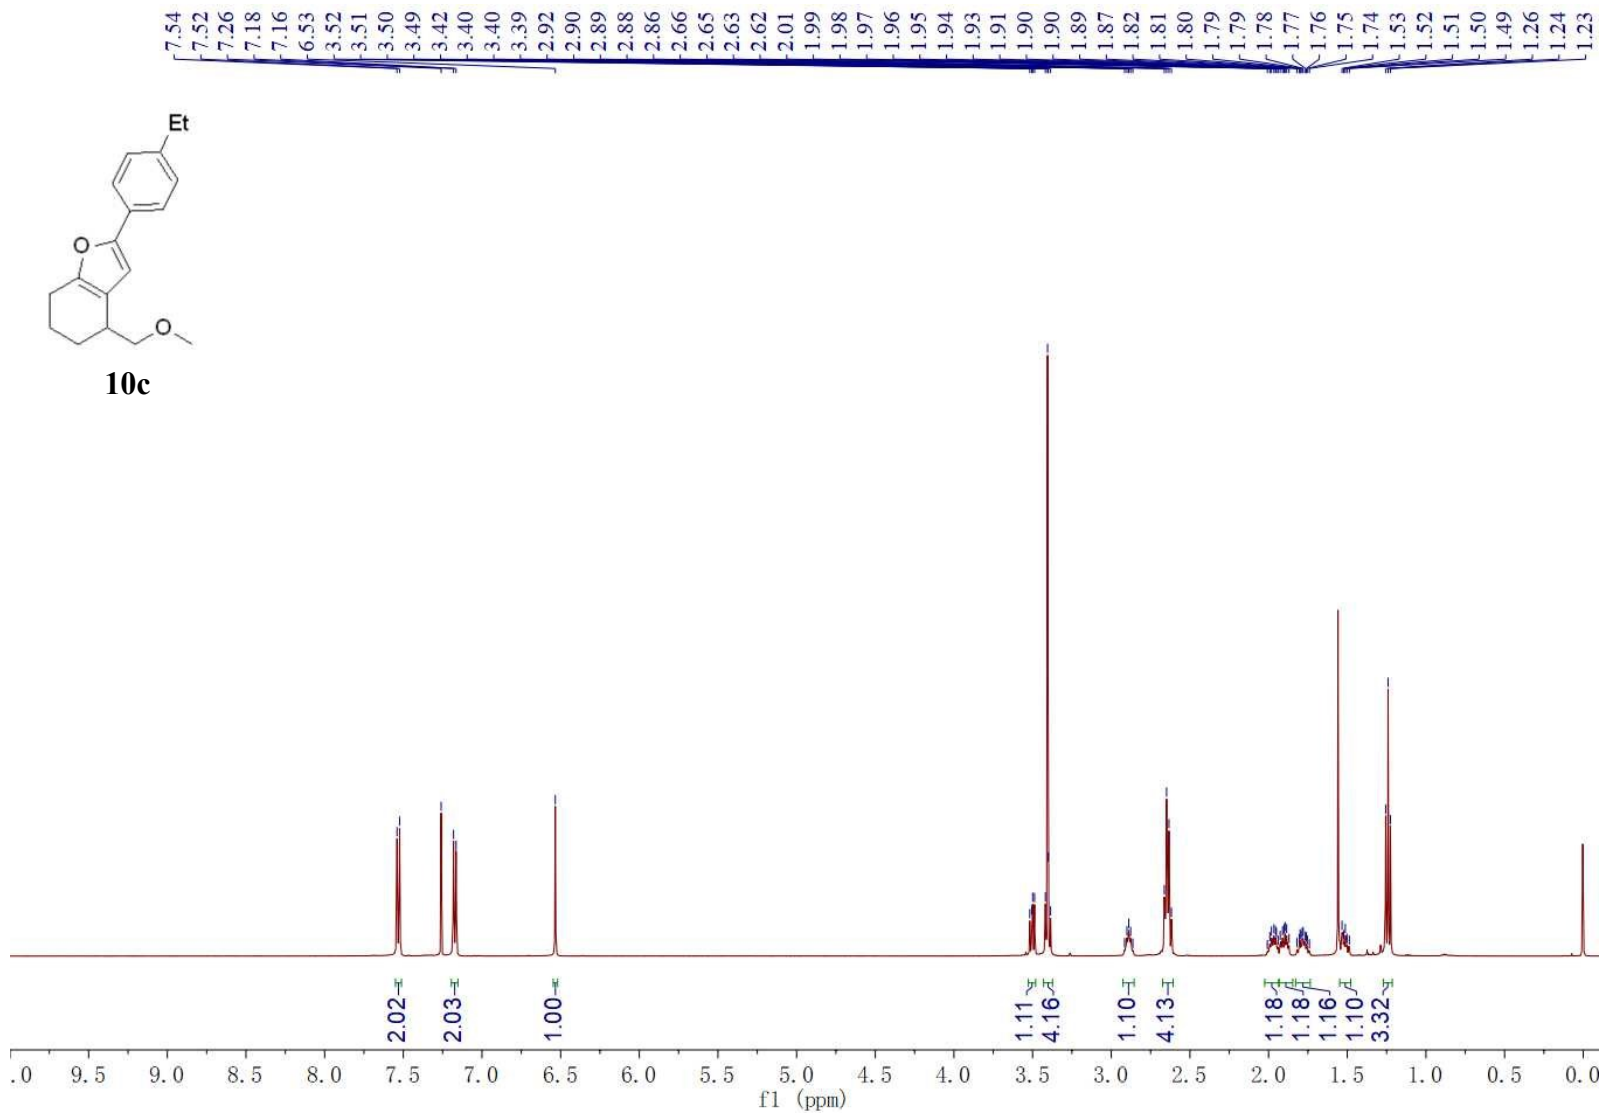

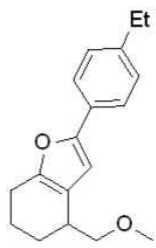

**10c**

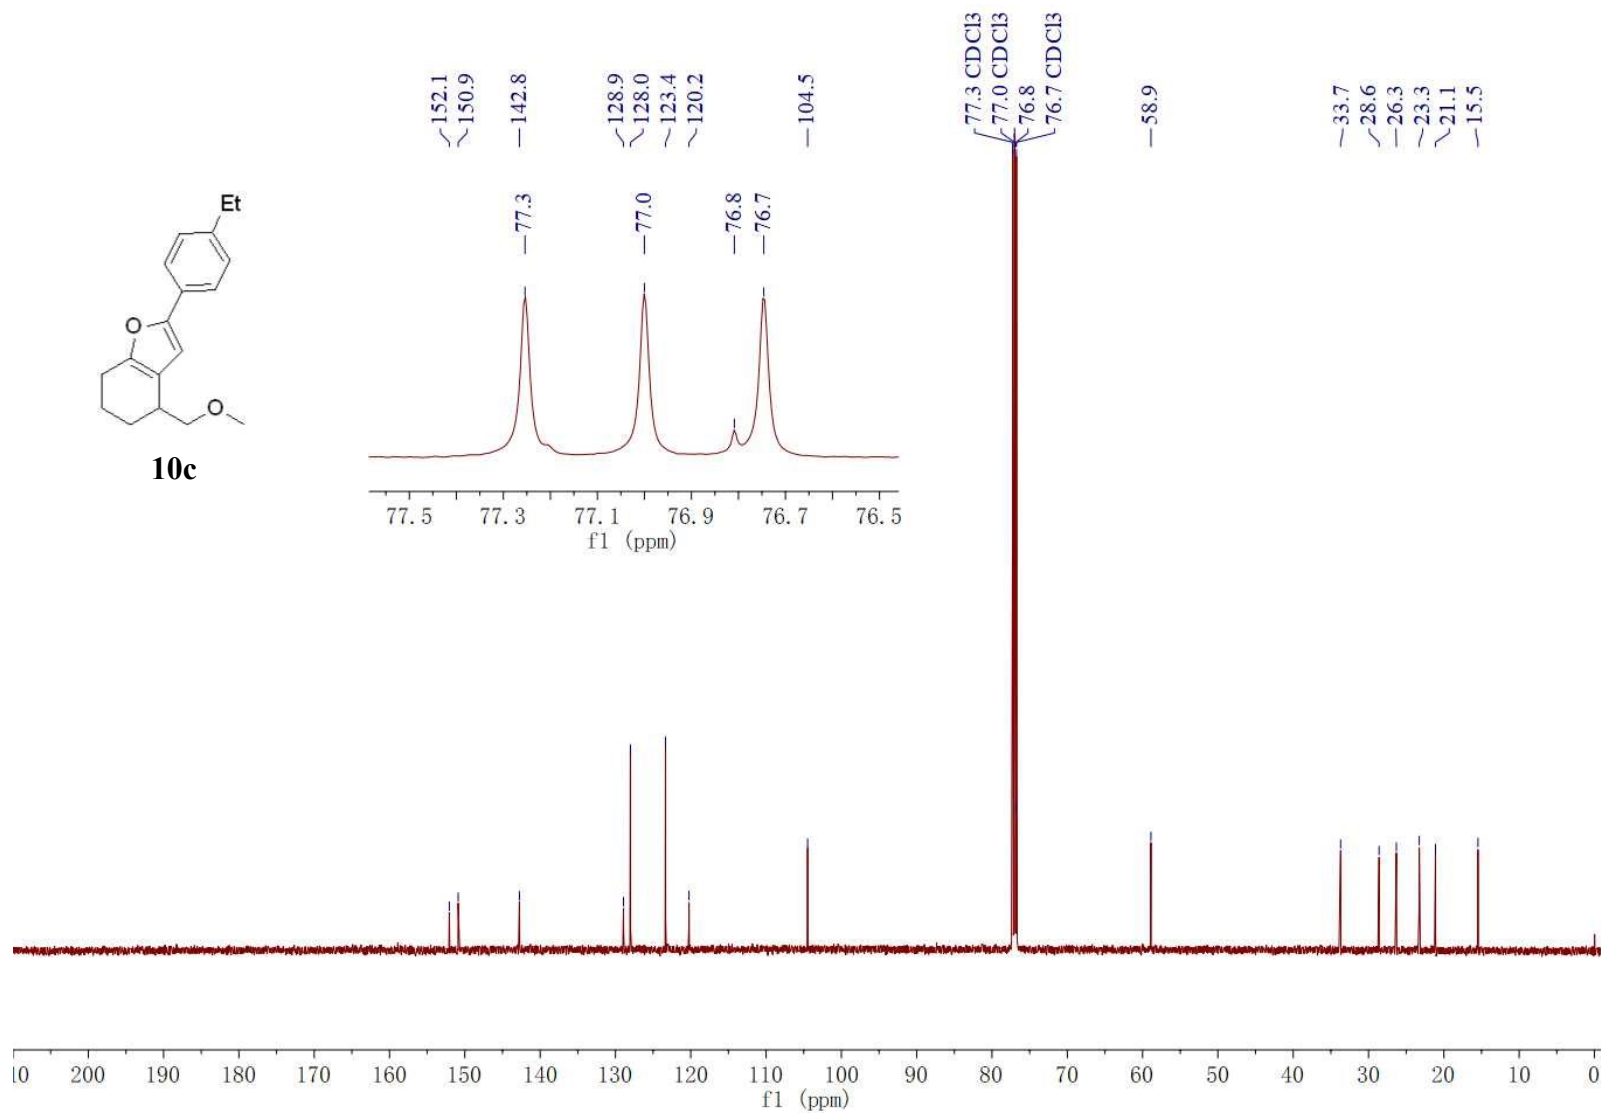

7.54  
7.52  
7.26  
7.17  
7.15  
6.54  
3.52  
3.51  
3.50  
3.49  
3.49  
3.42  
3.41  
3.41  
3.39  
2.91  
2.89  
2.88  
2.66  
2.65  
2.64  
2.61  
2.59  
2.58  
2.00  
1.99  
1.97  
1.96  
1.96  
1.95  
1.93  
1.92  
1.90  
1.89  
1.88  
1.80  
1.79  
1.78  
1.77  
1.76  
1.65  
1.64  
1.62  
1.61  
1.59  
1.56  
1.54  
1.51  
1.49  
1.38  
1.37  
1.34  
1.34  
1.33  
1.32  
1.31  
0.91  
0.90  
0.88

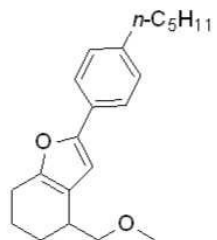

10d

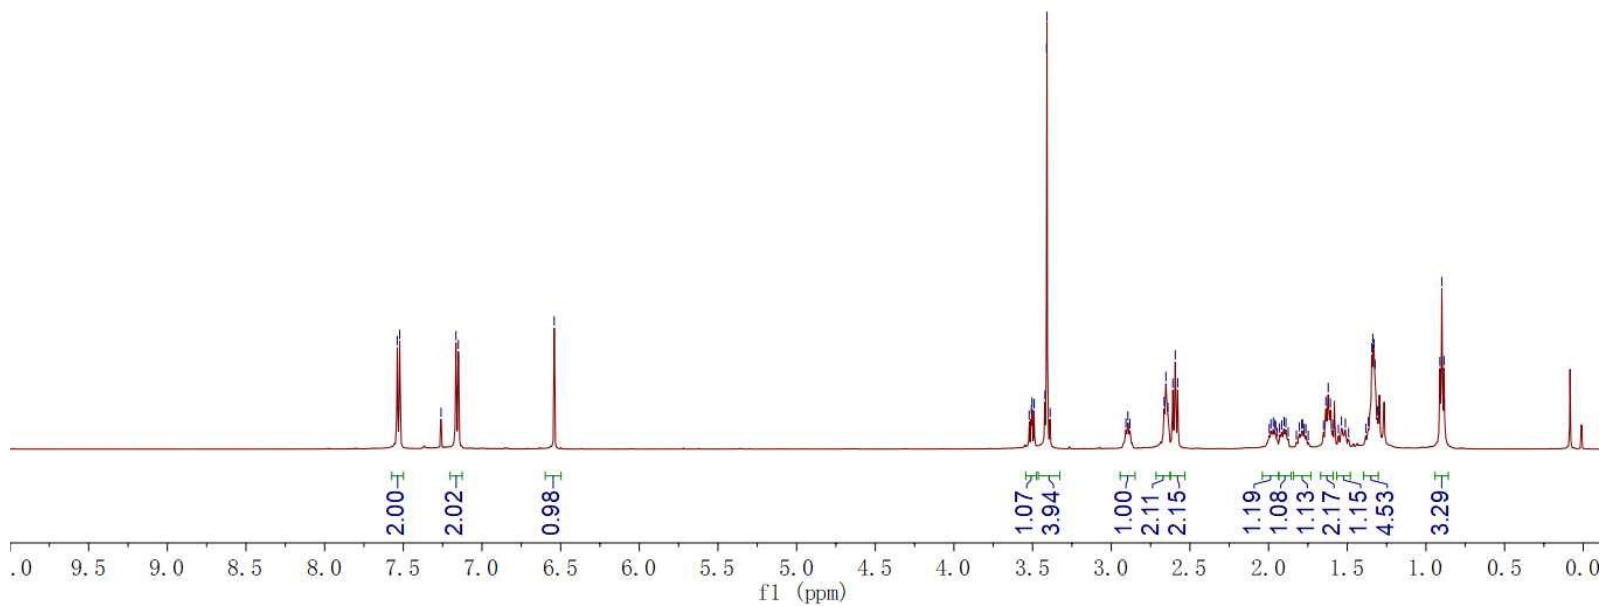

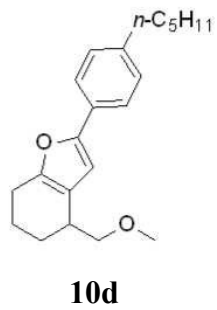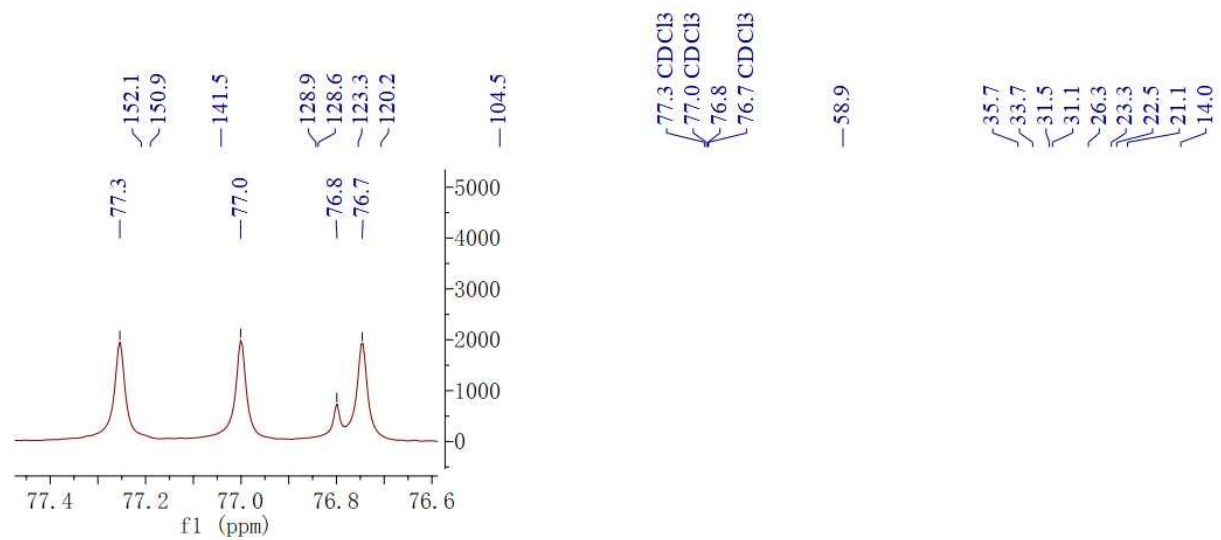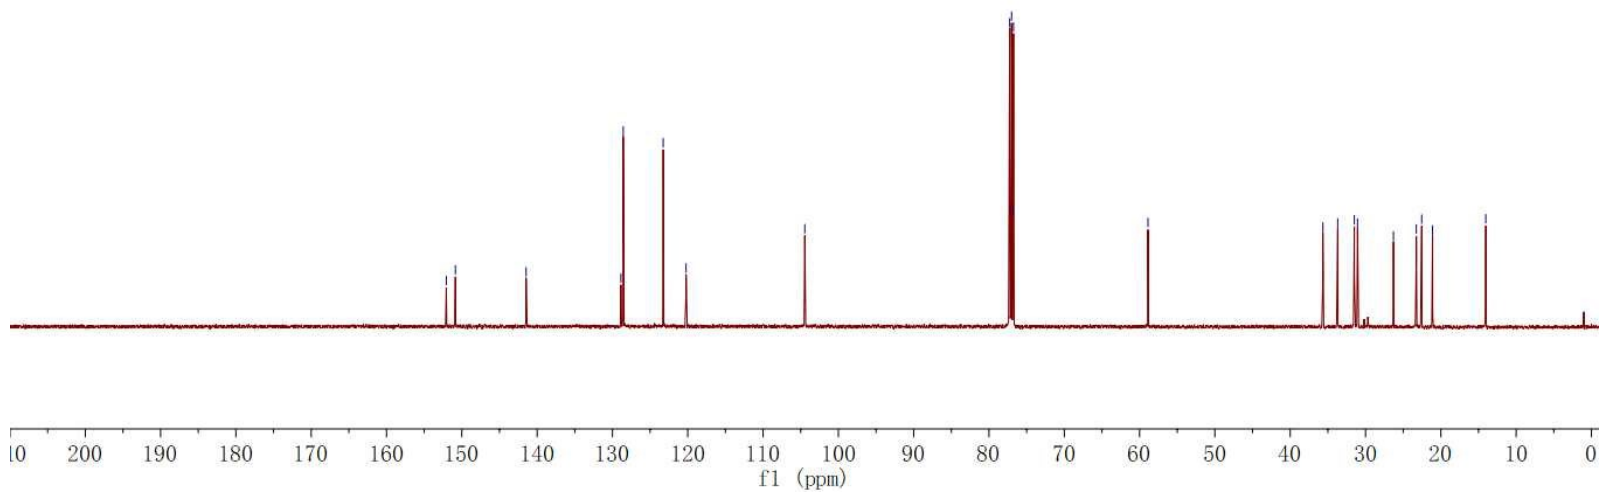



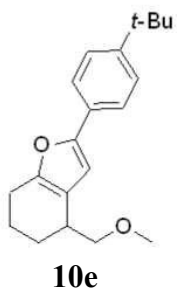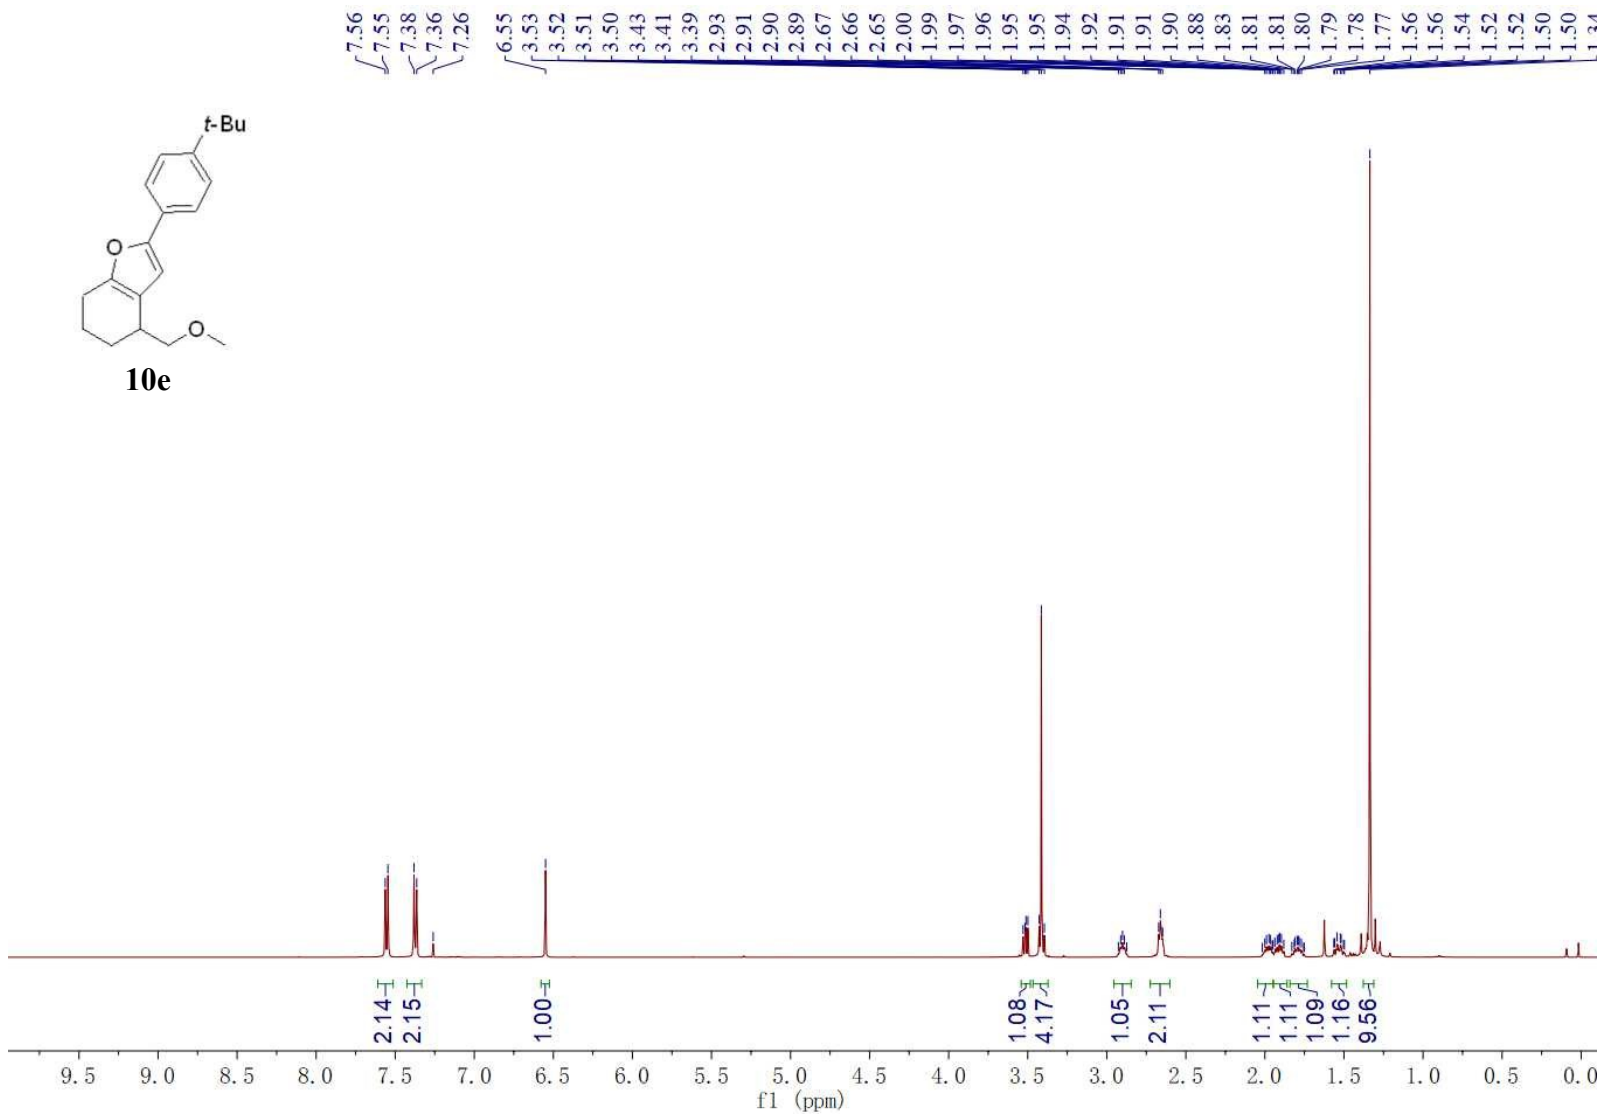

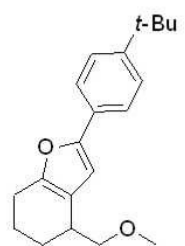

10e

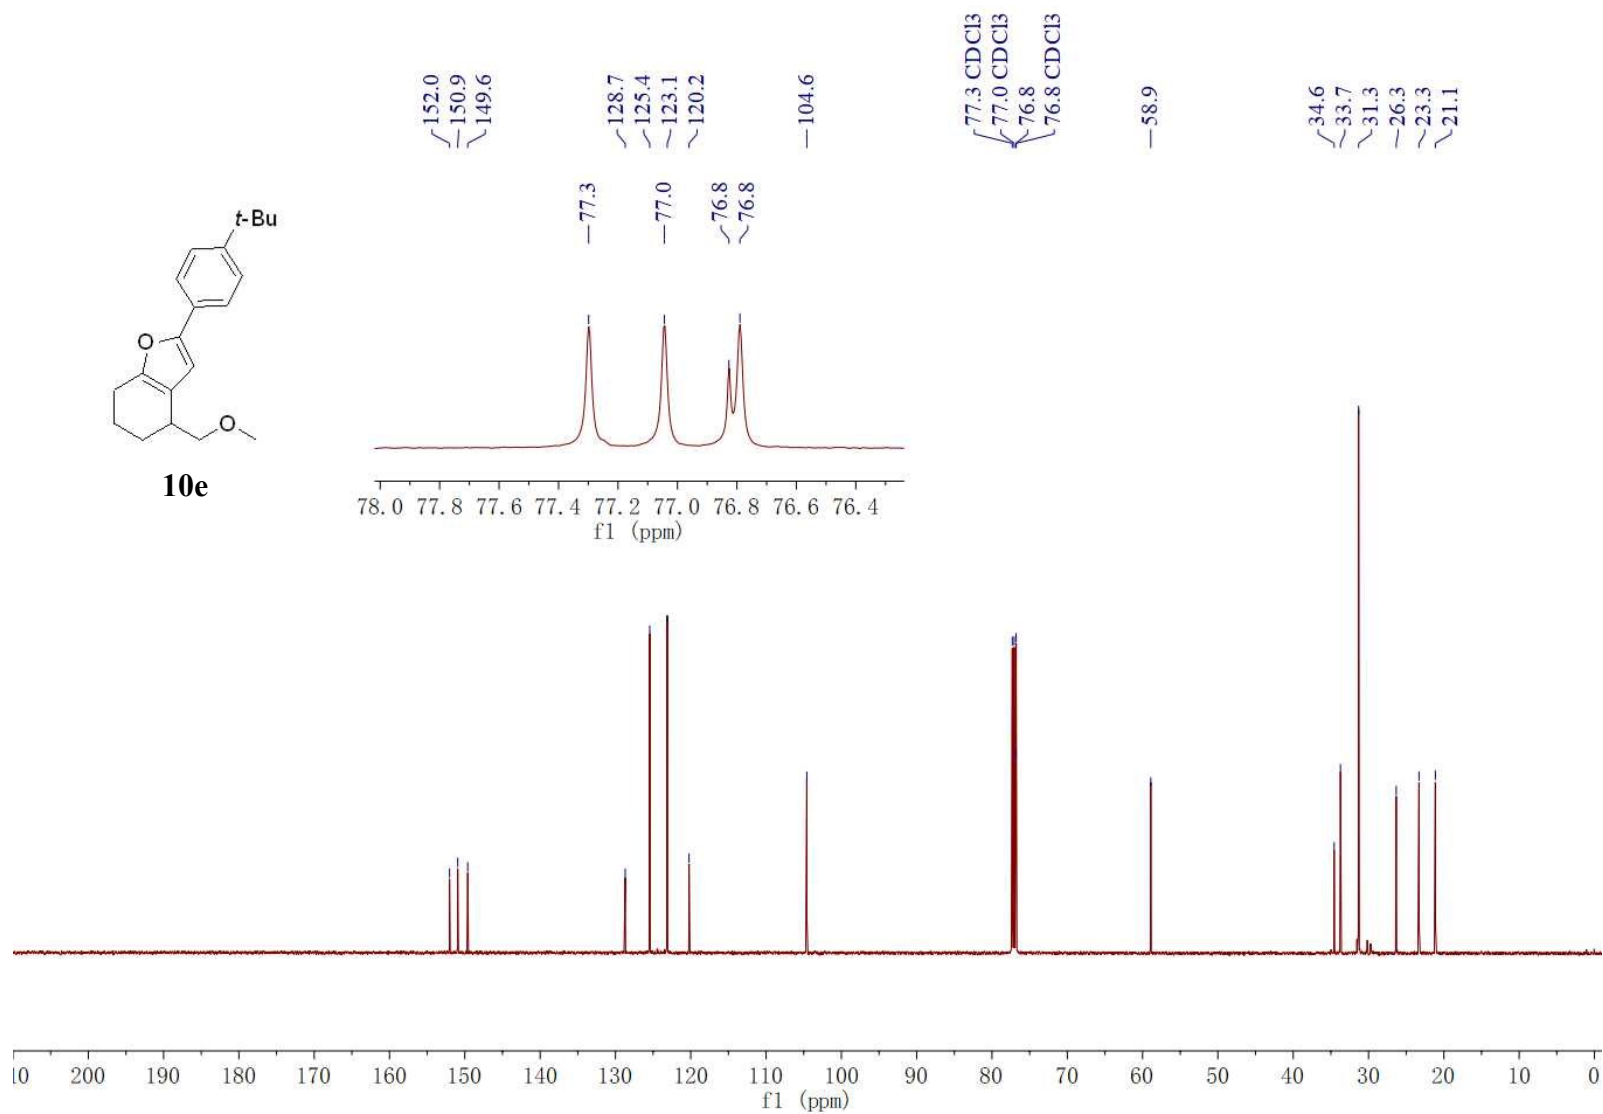

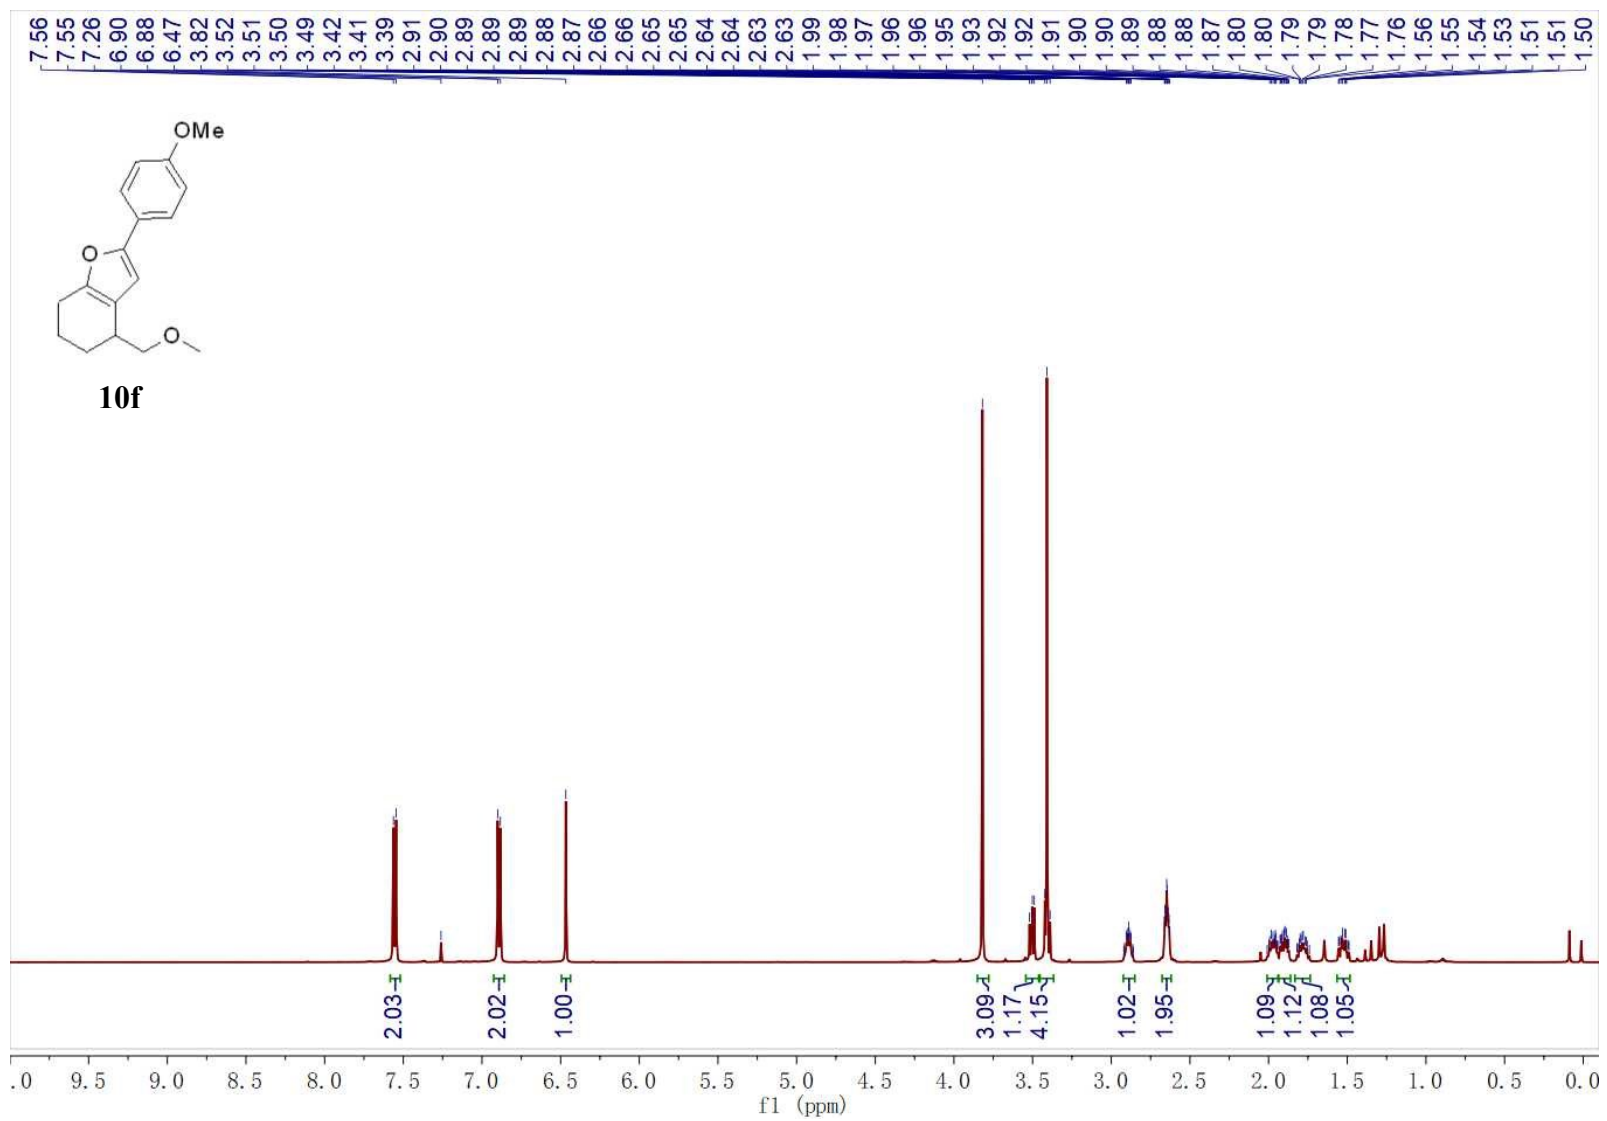

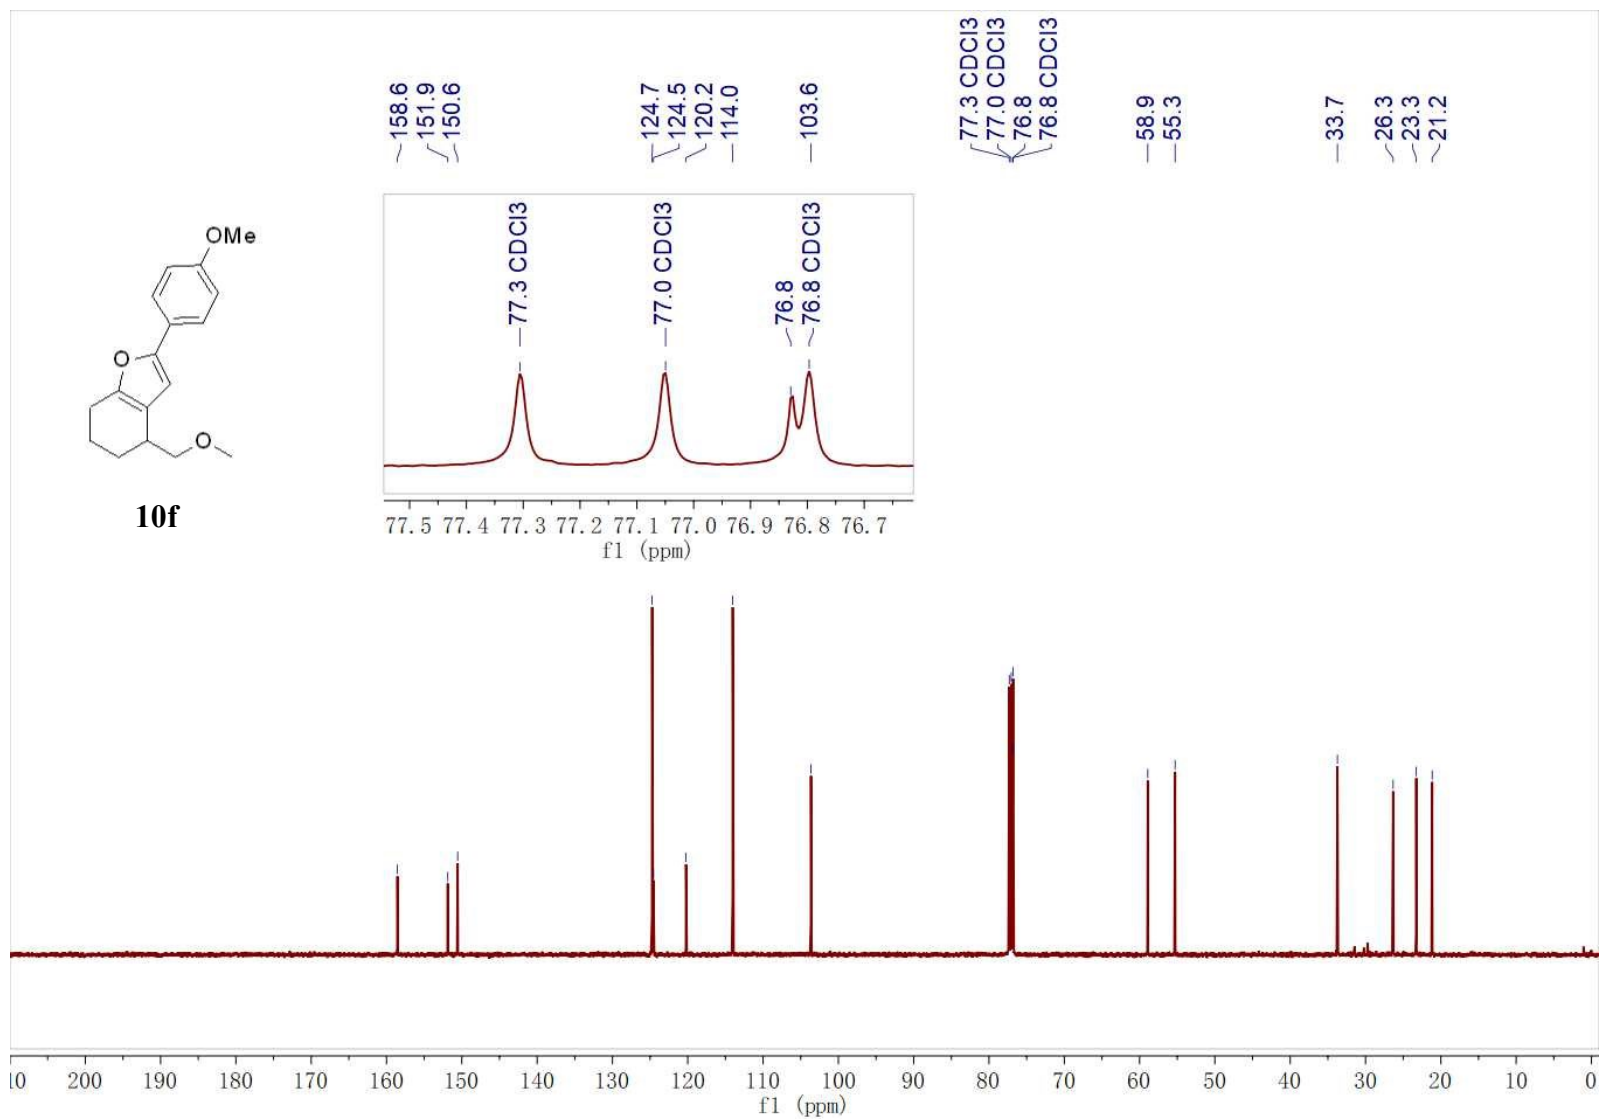

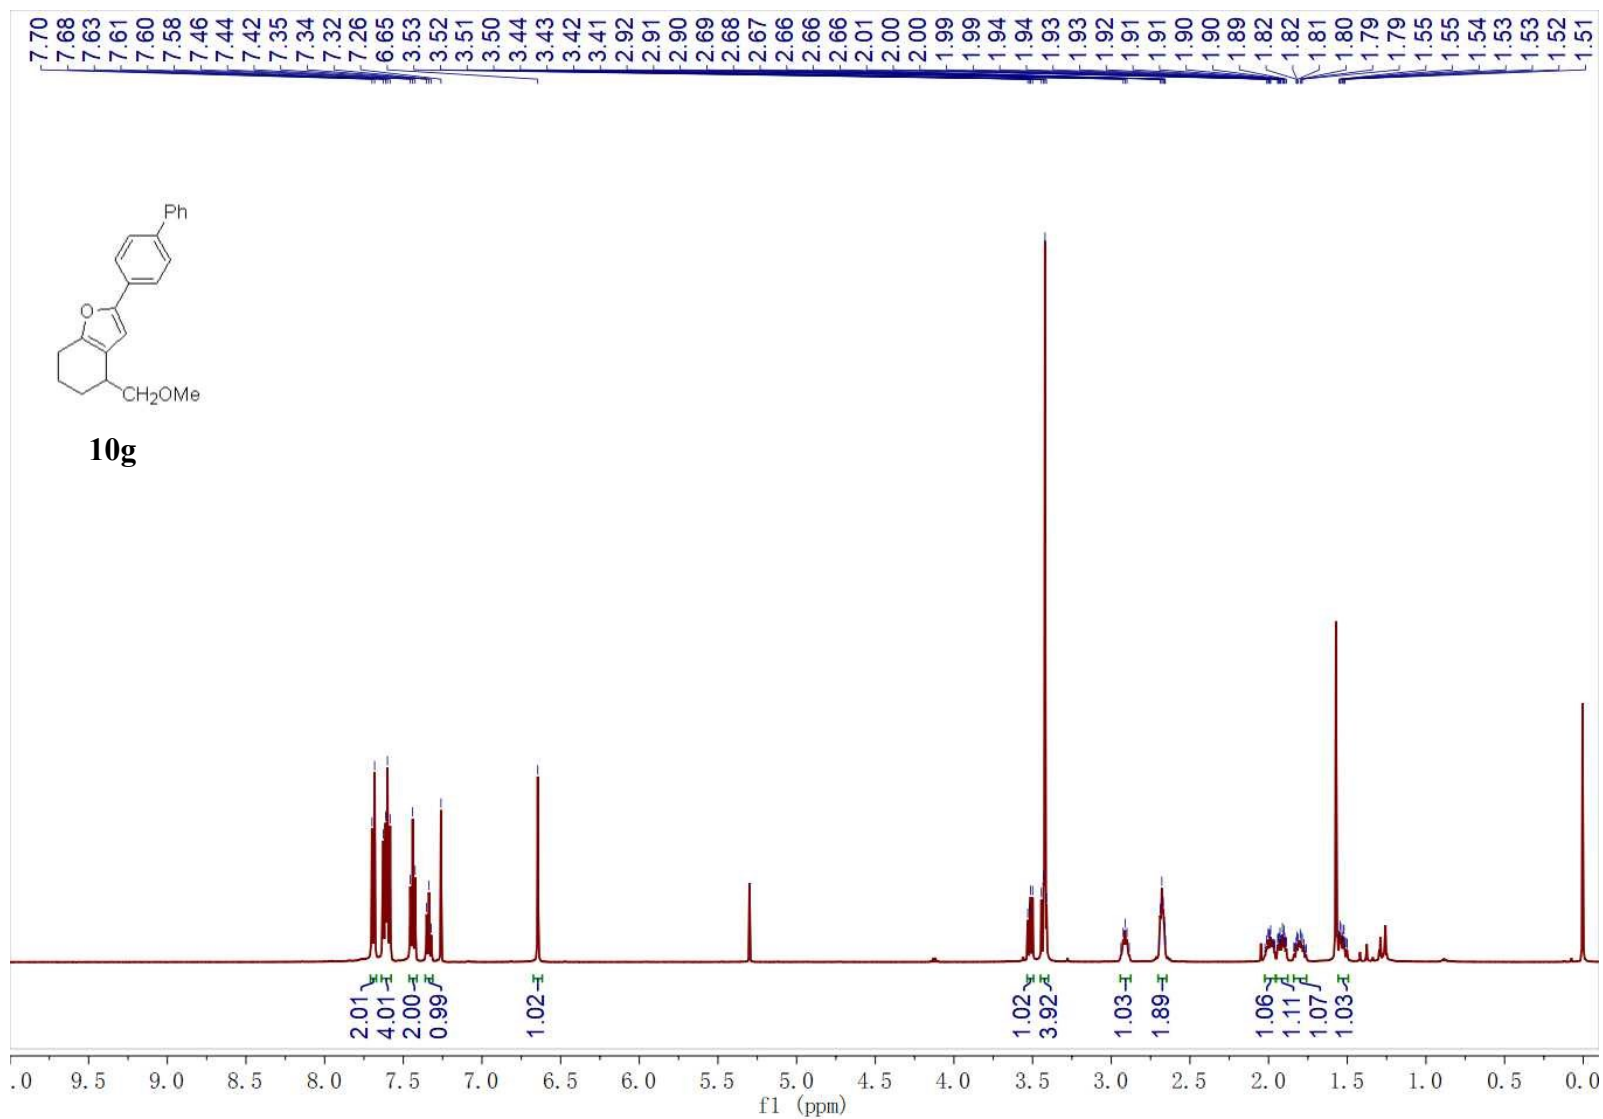

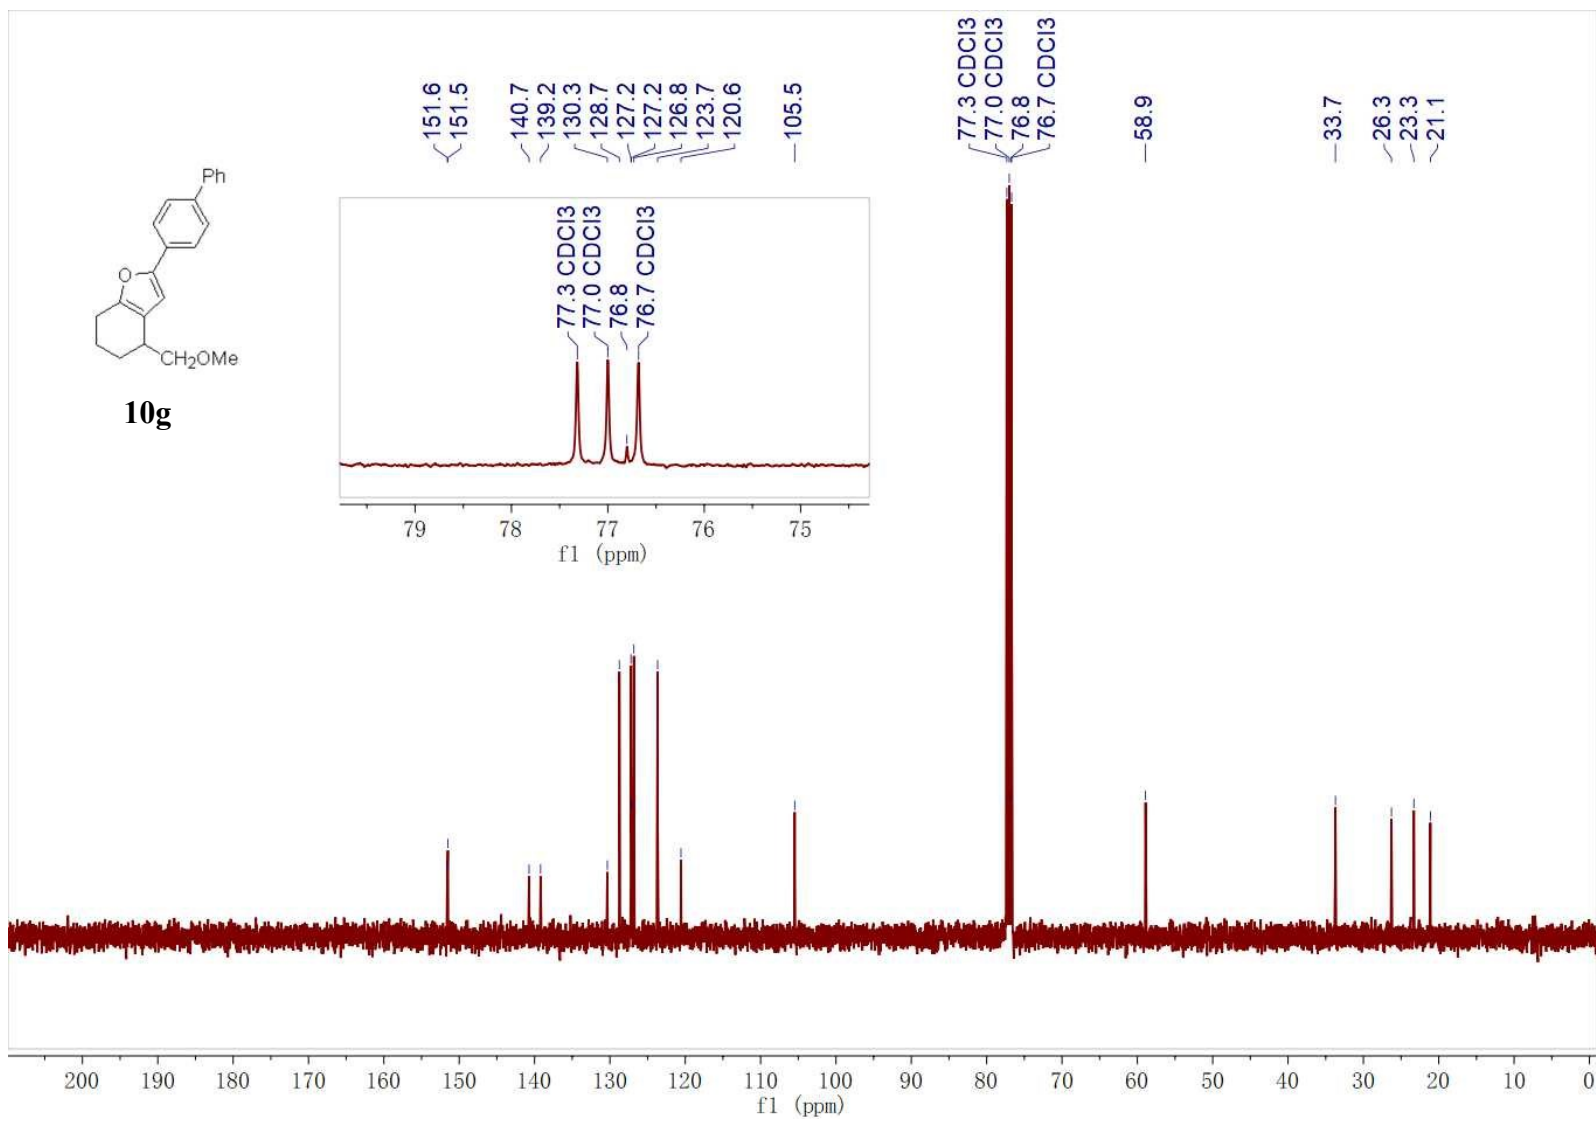

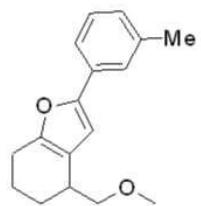

10h

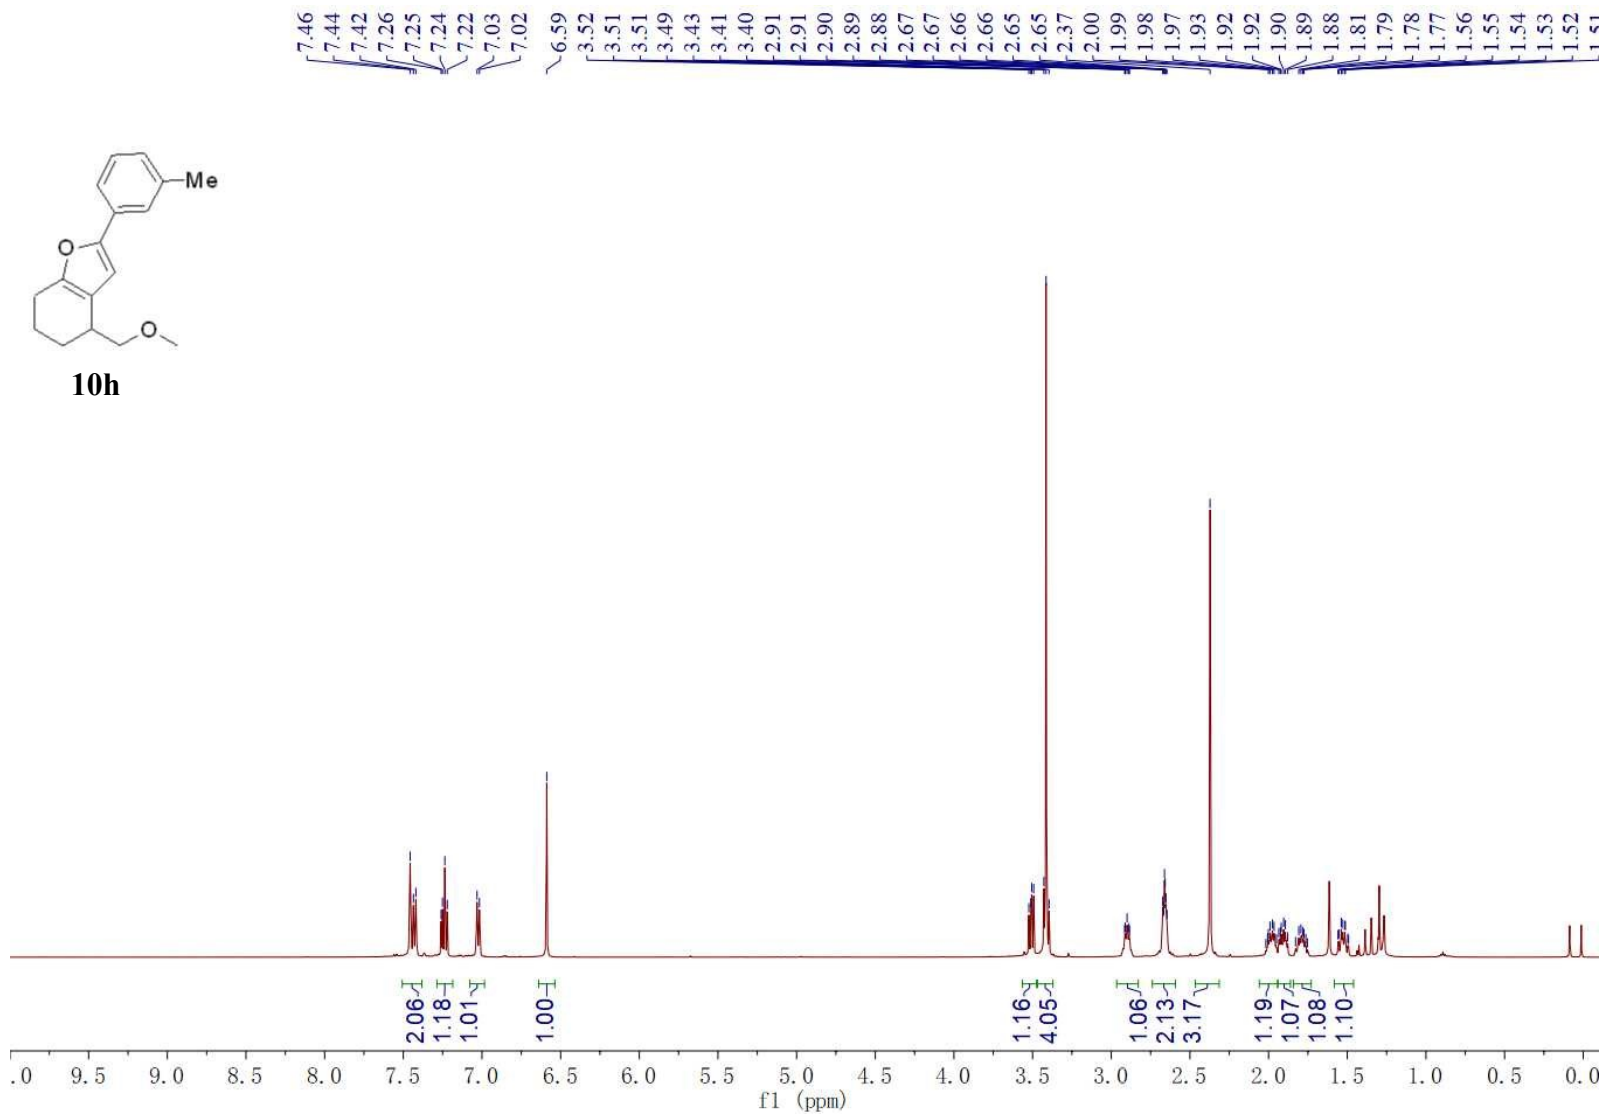

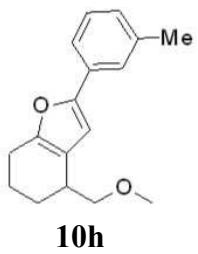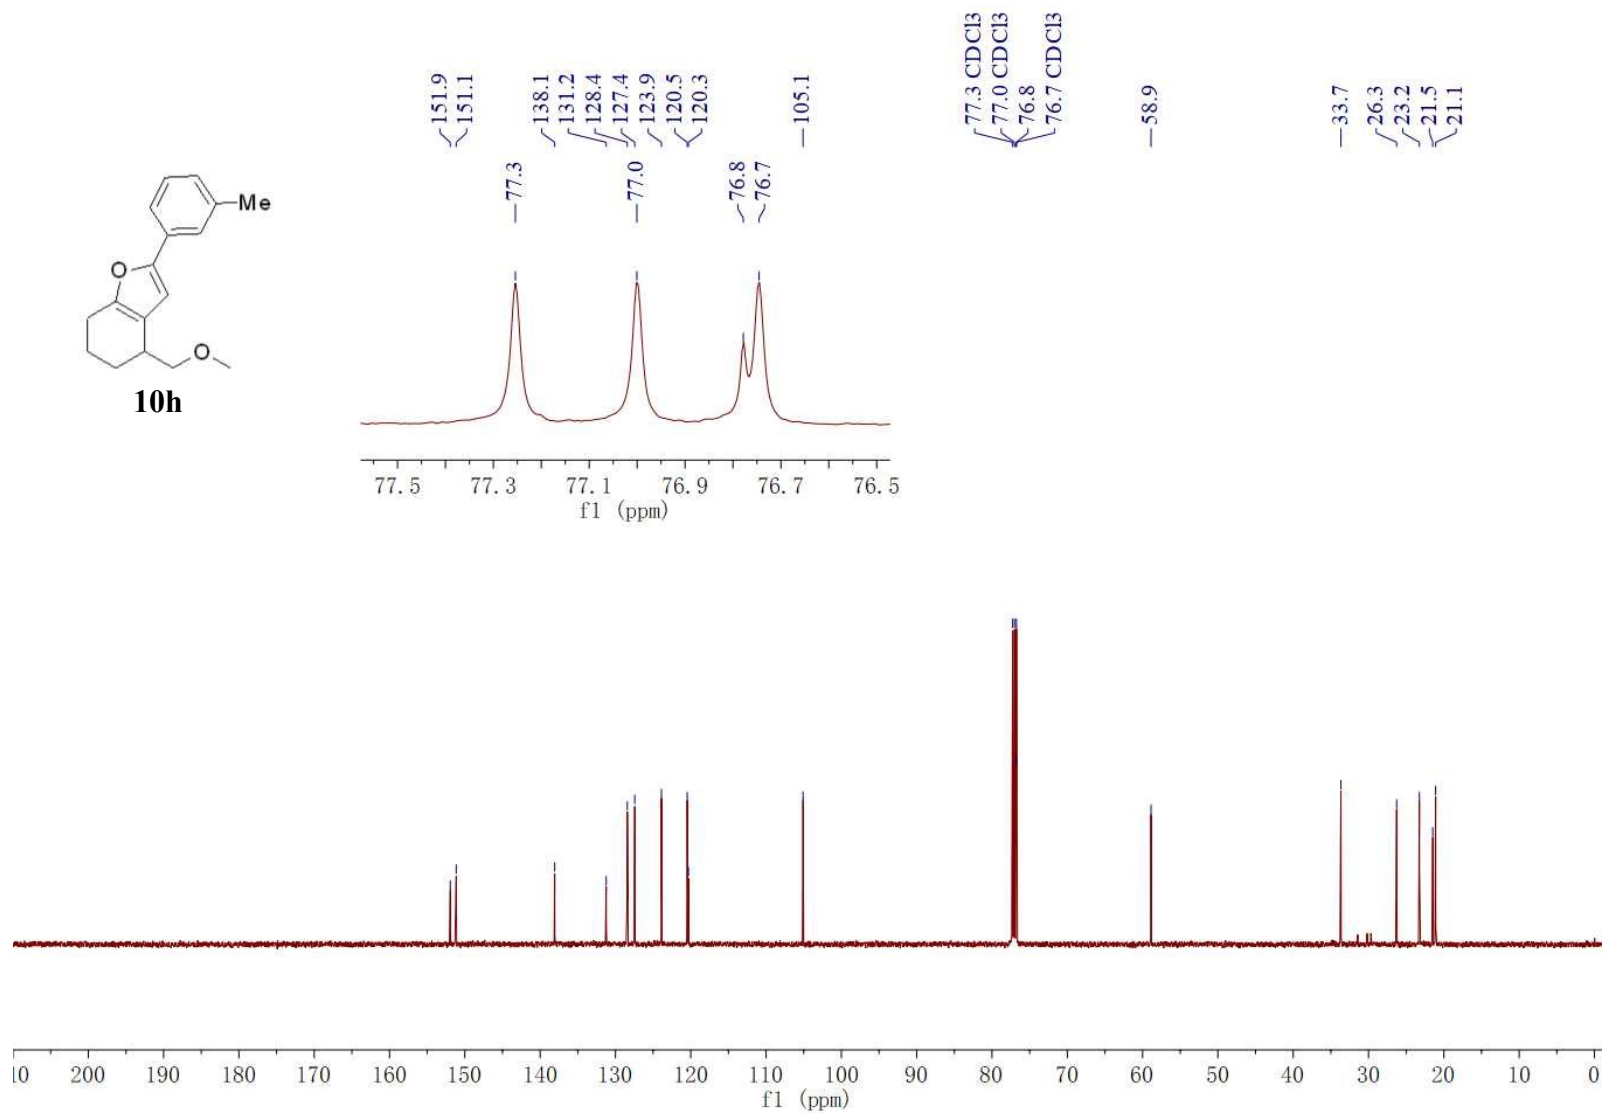



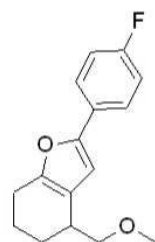

**10i**

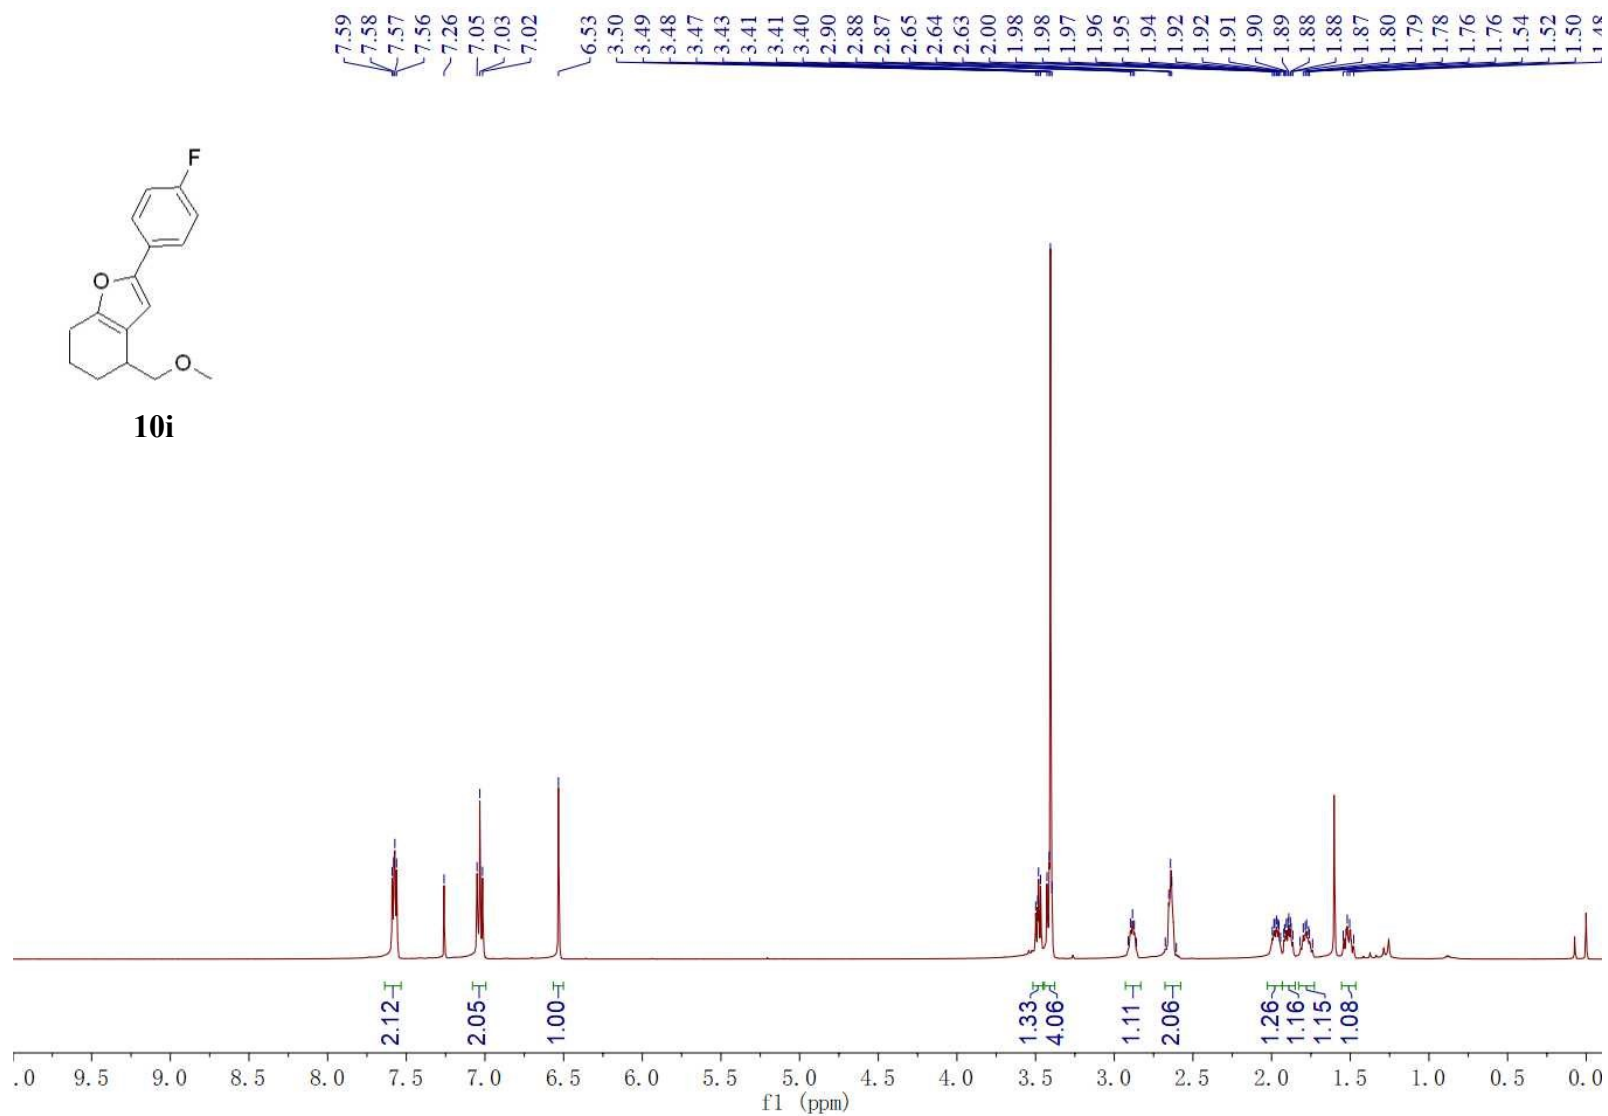

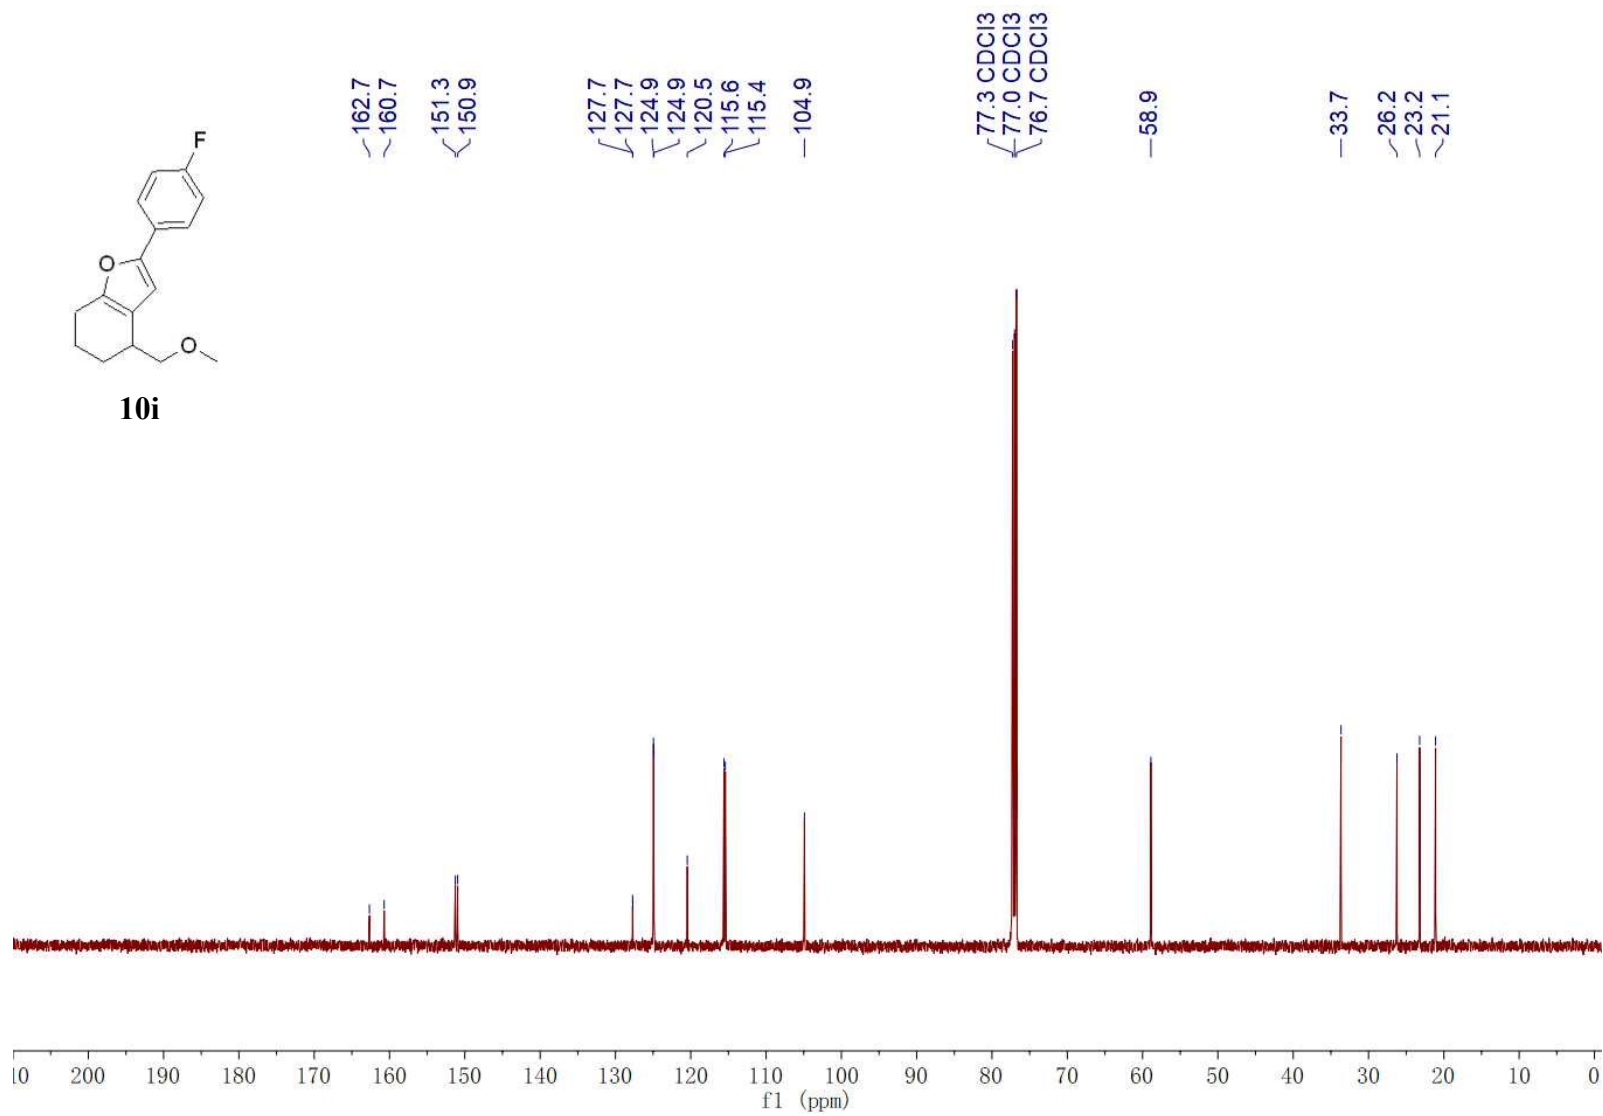

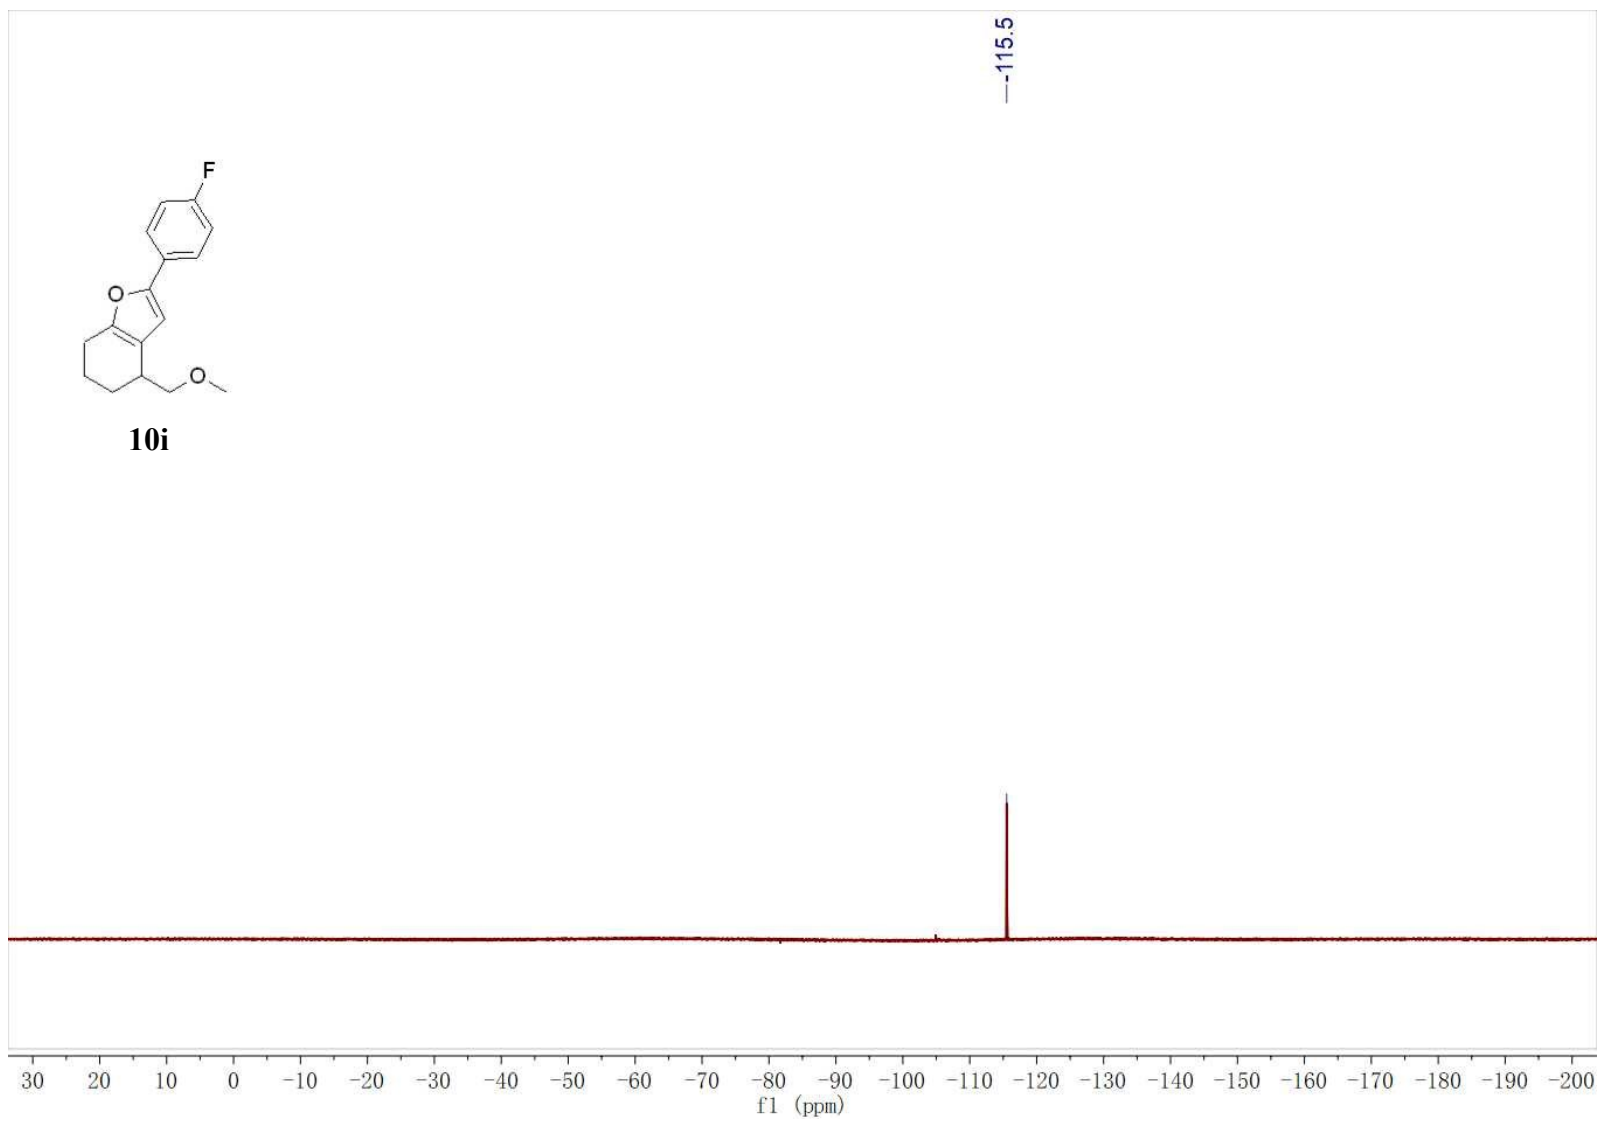

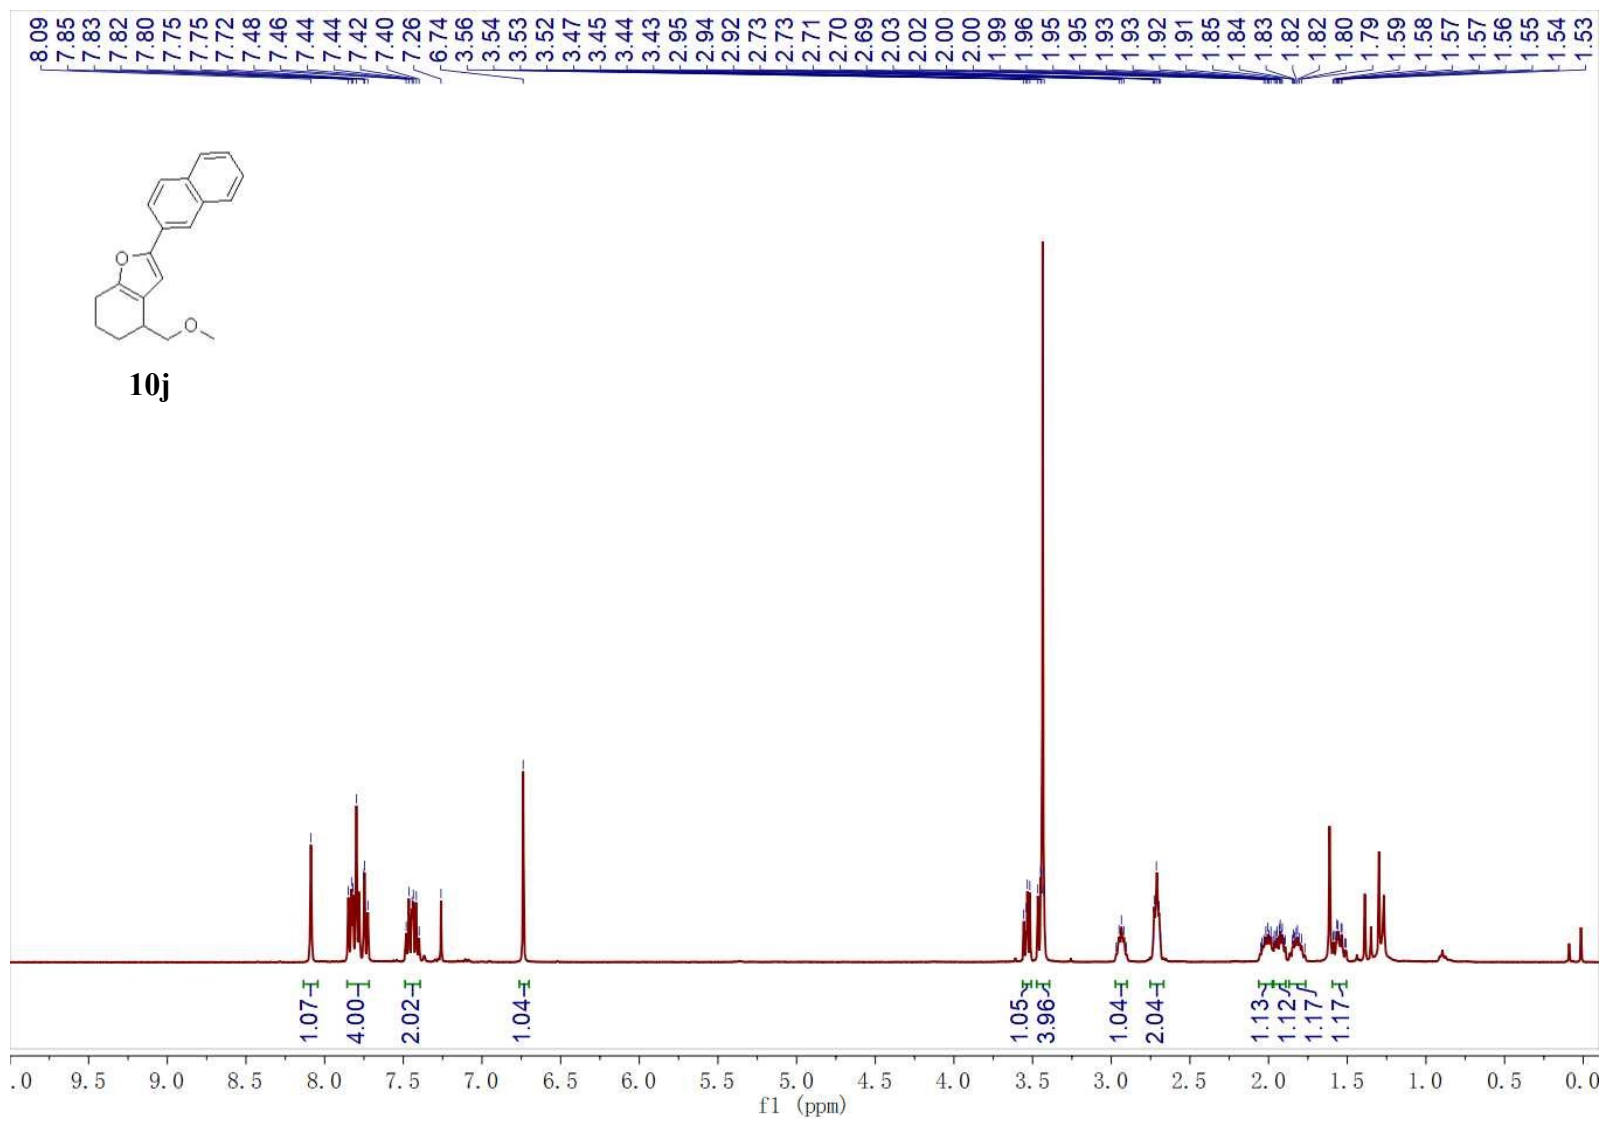

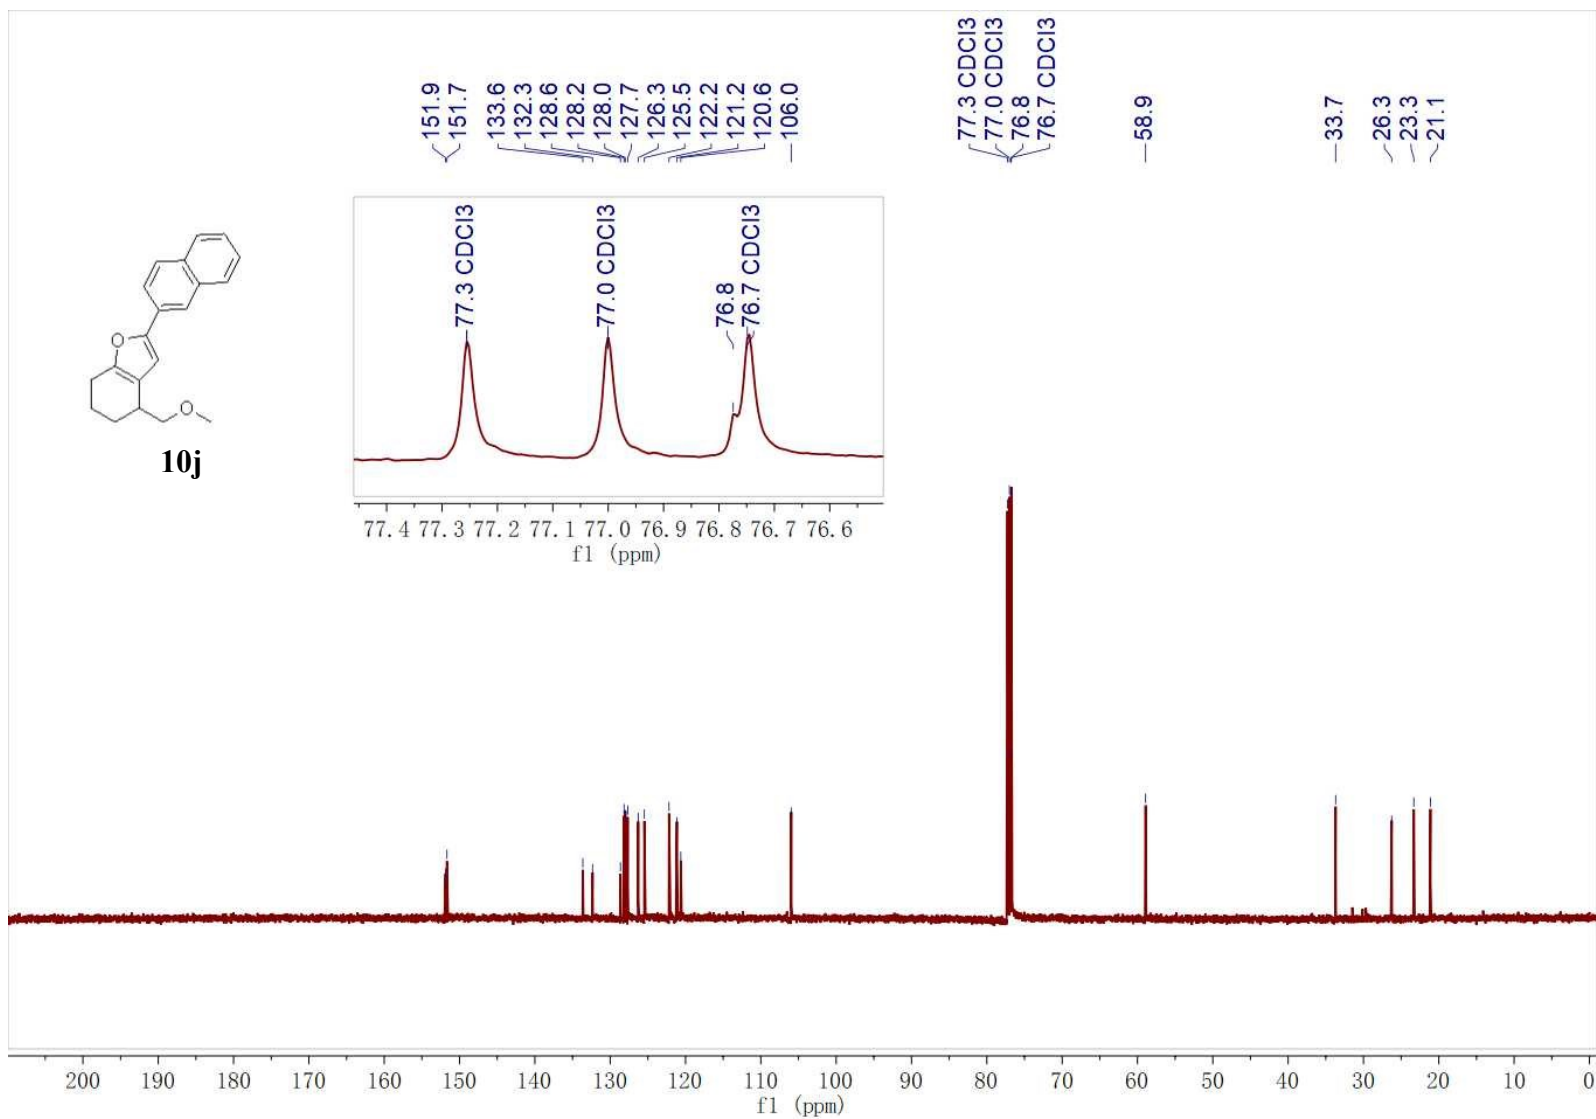

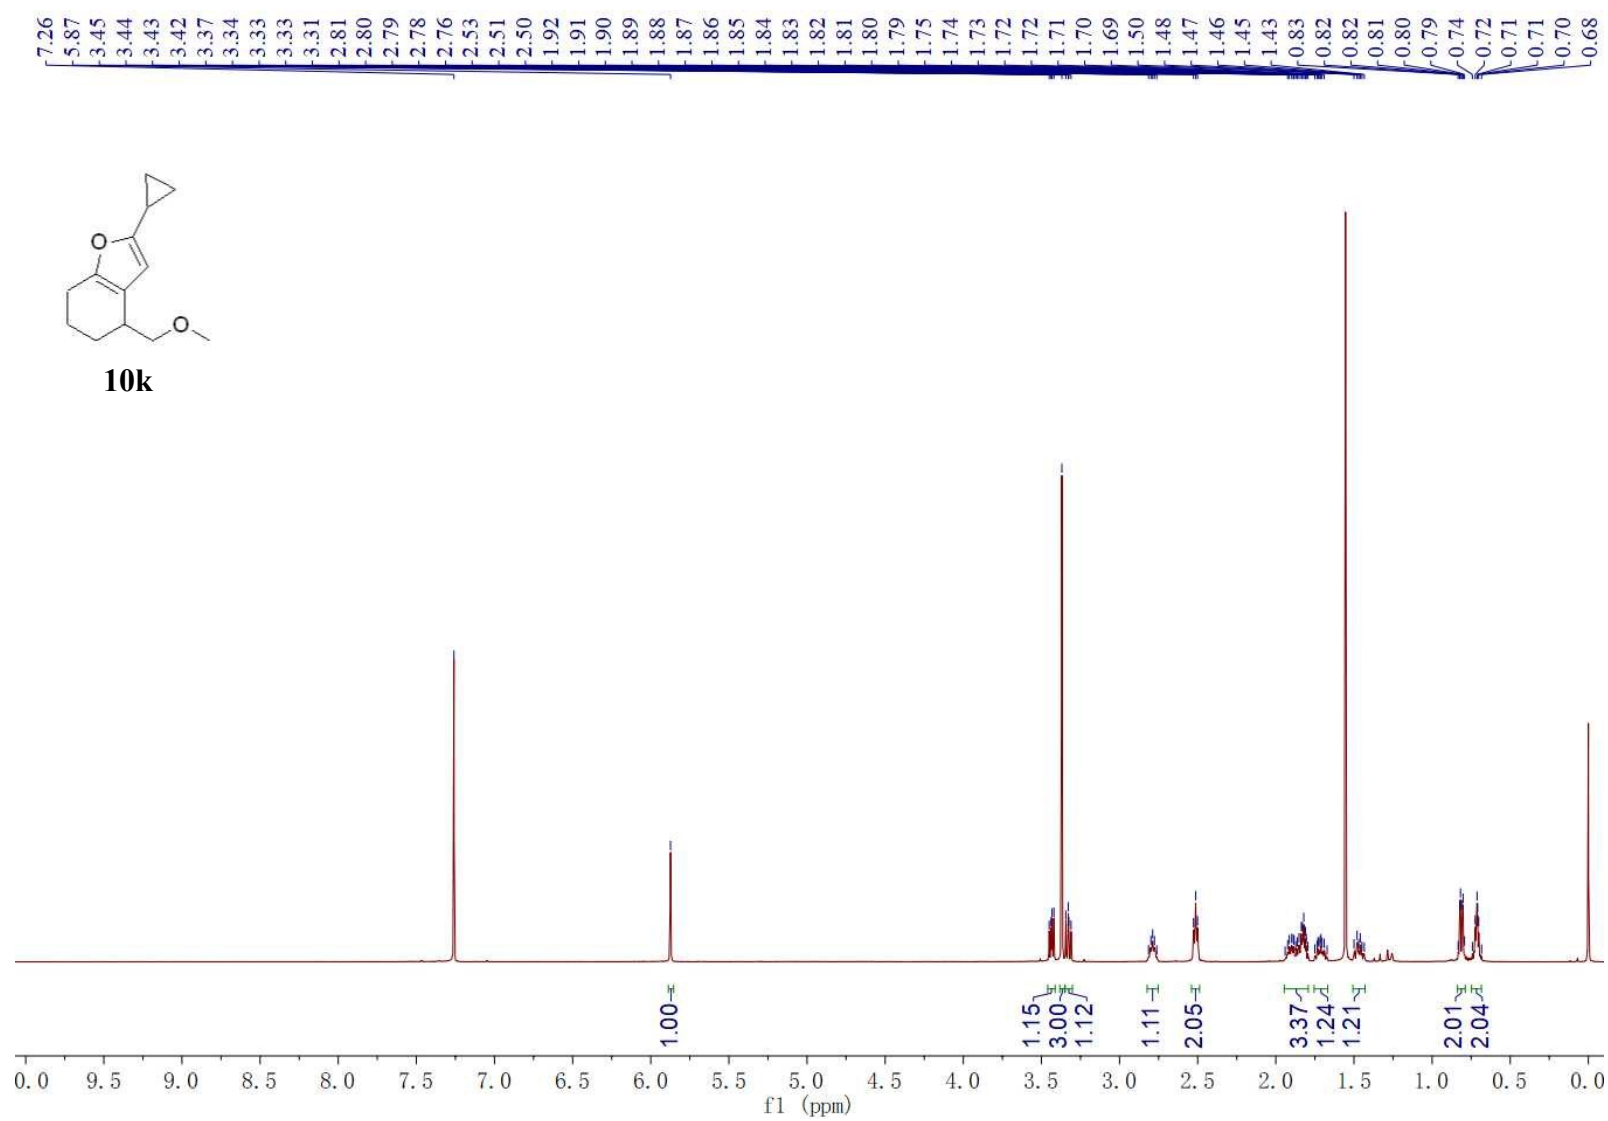

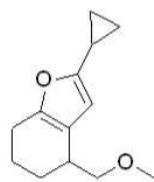

**10k**

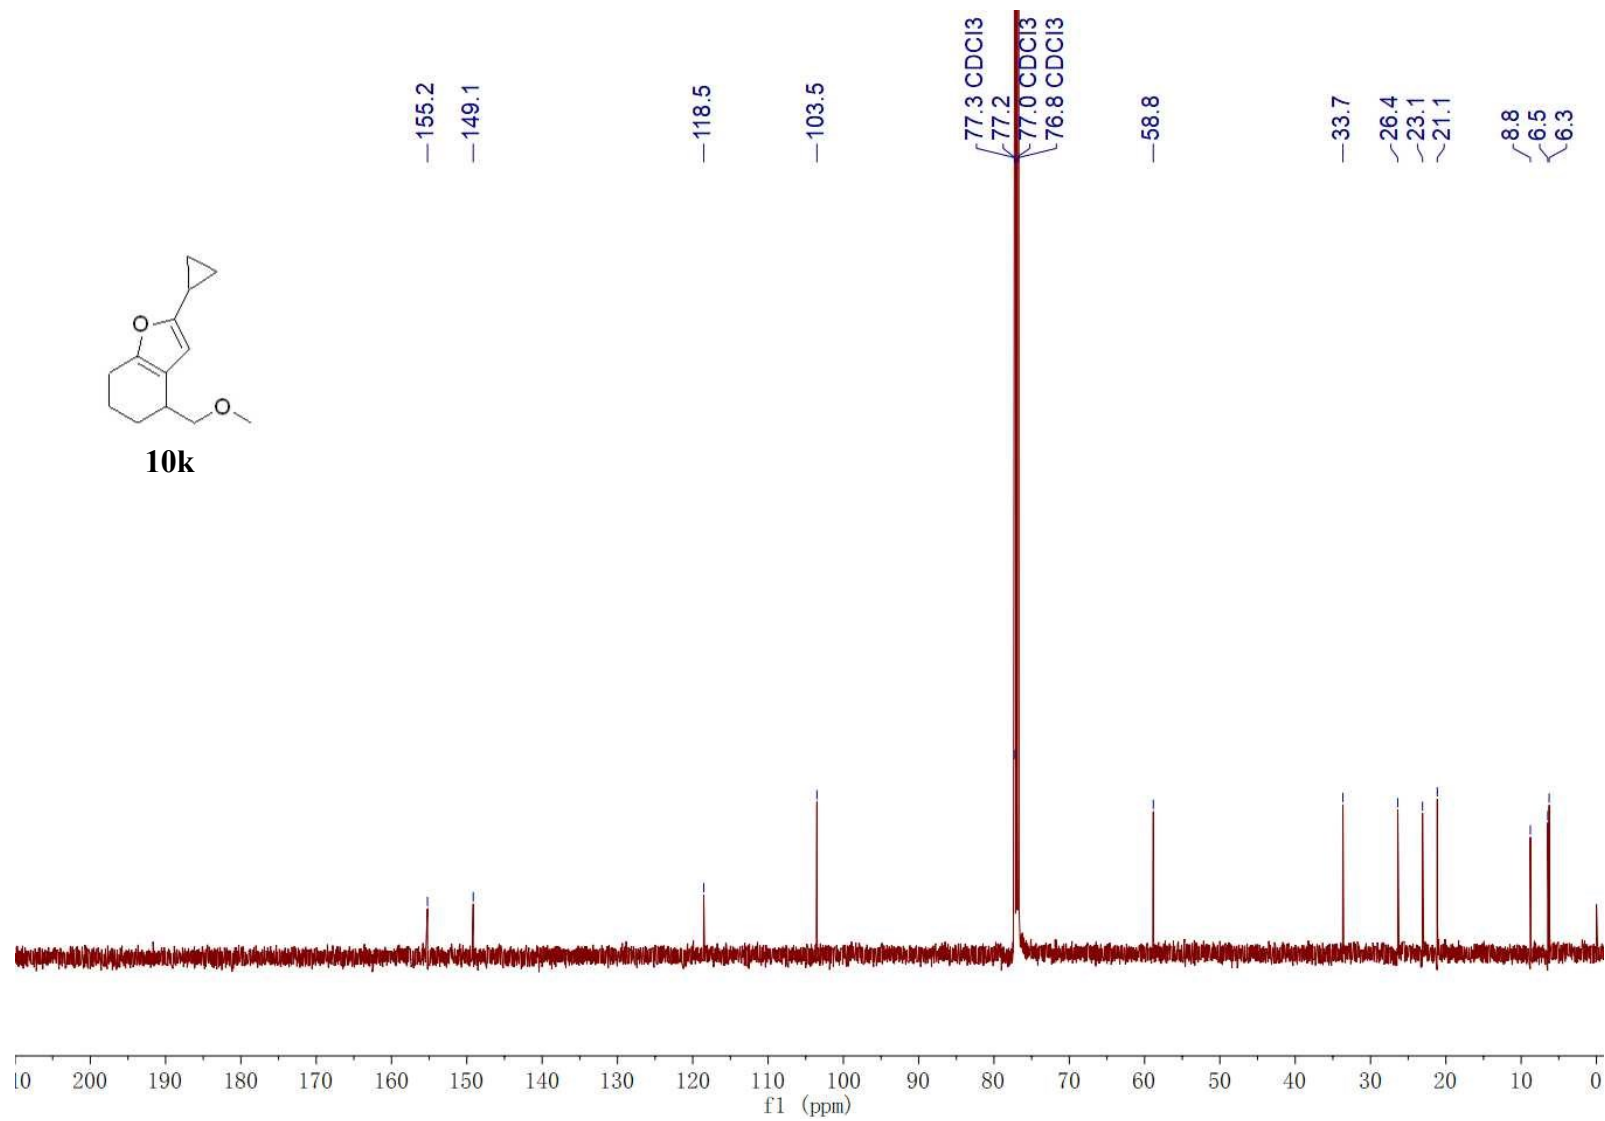

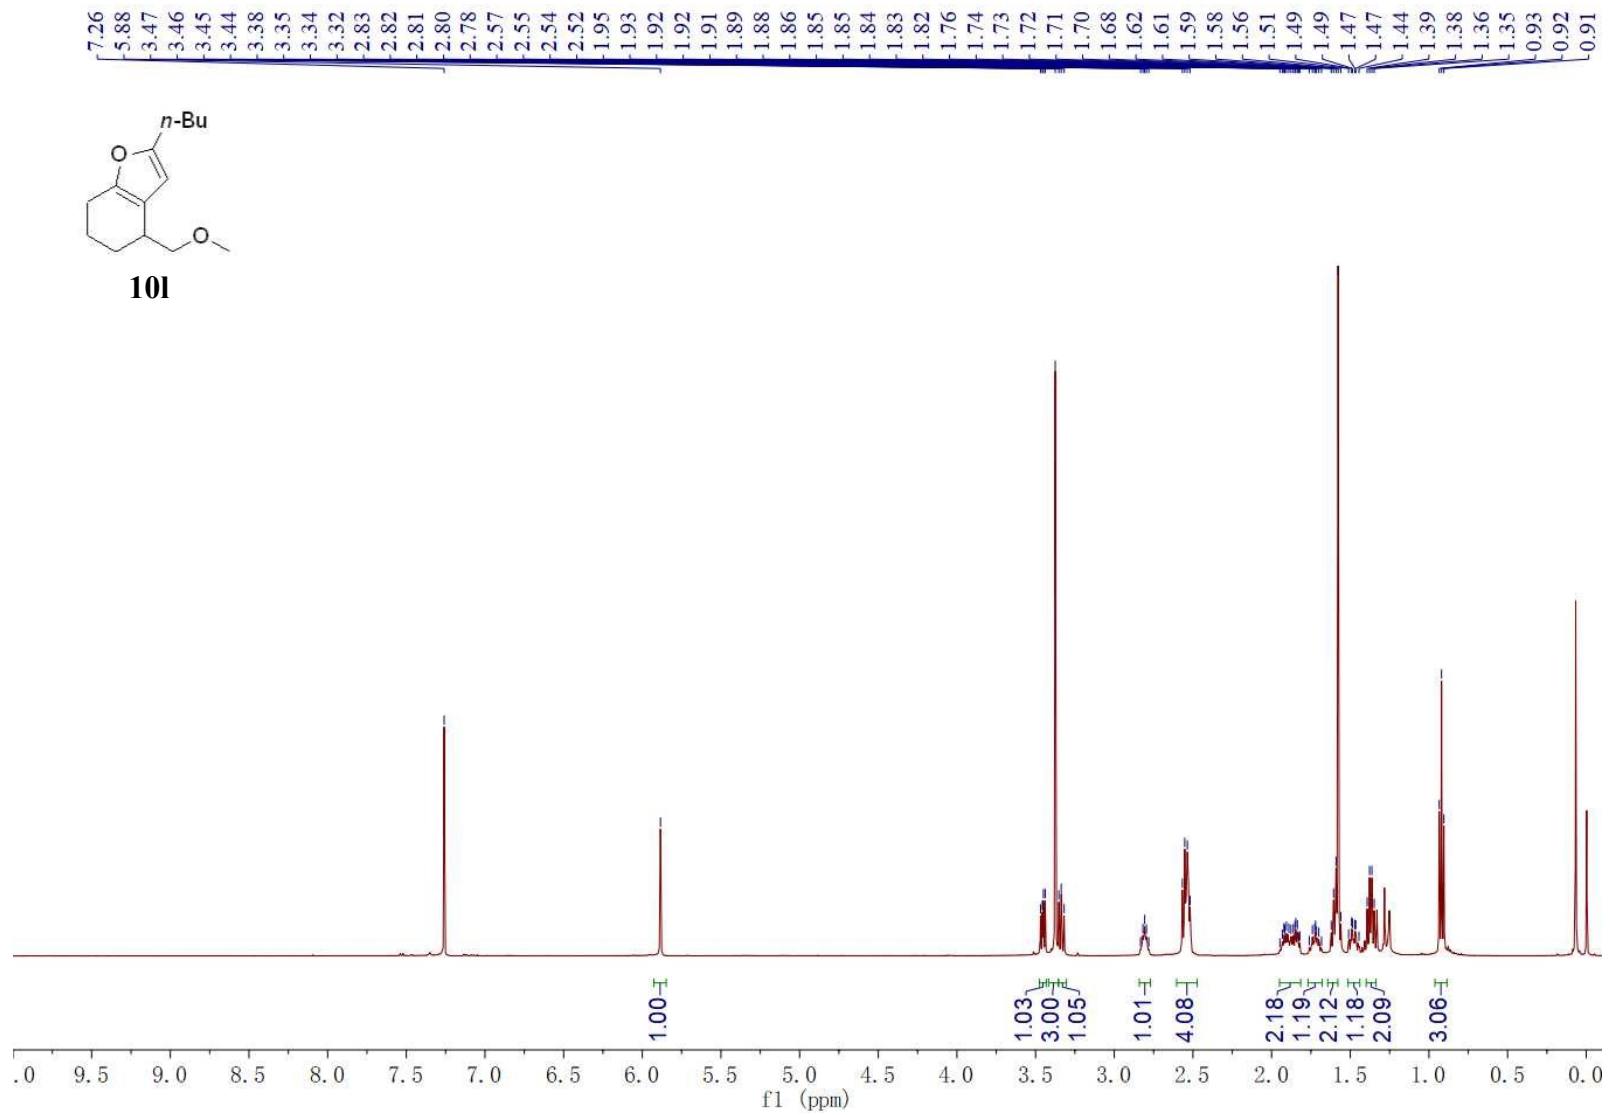



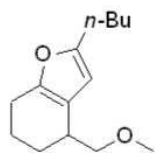

**101**

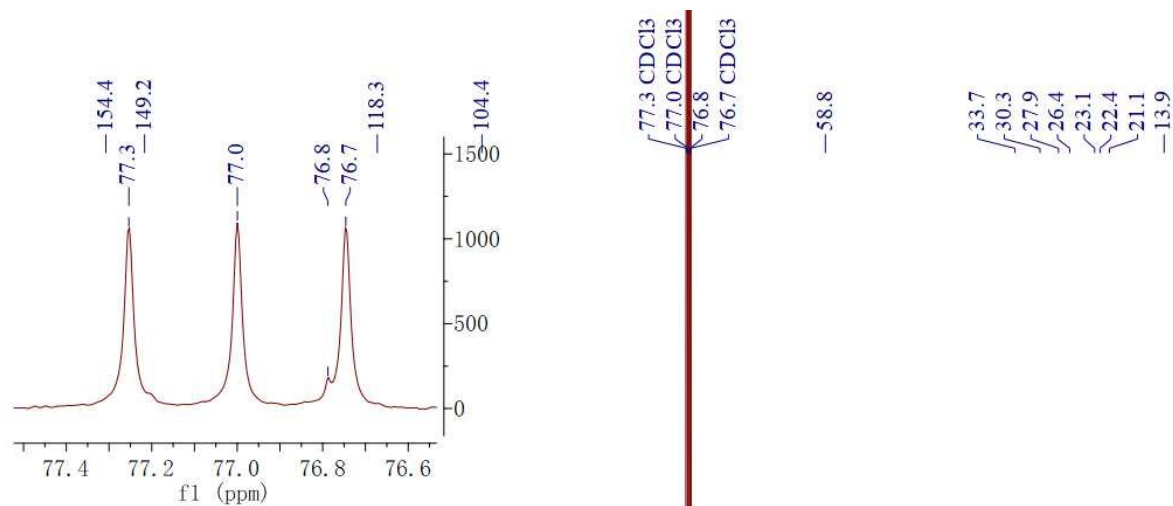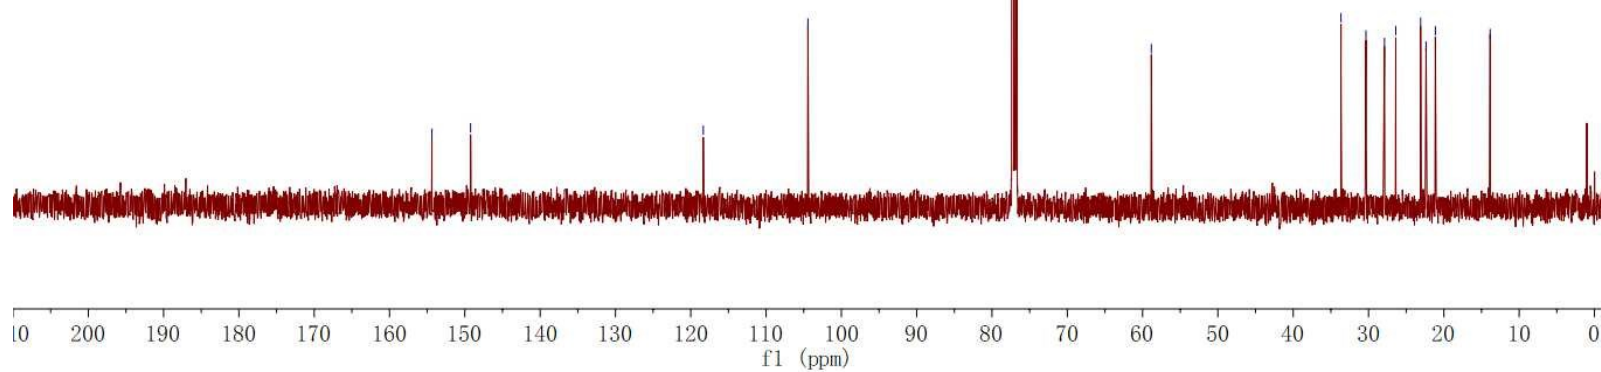

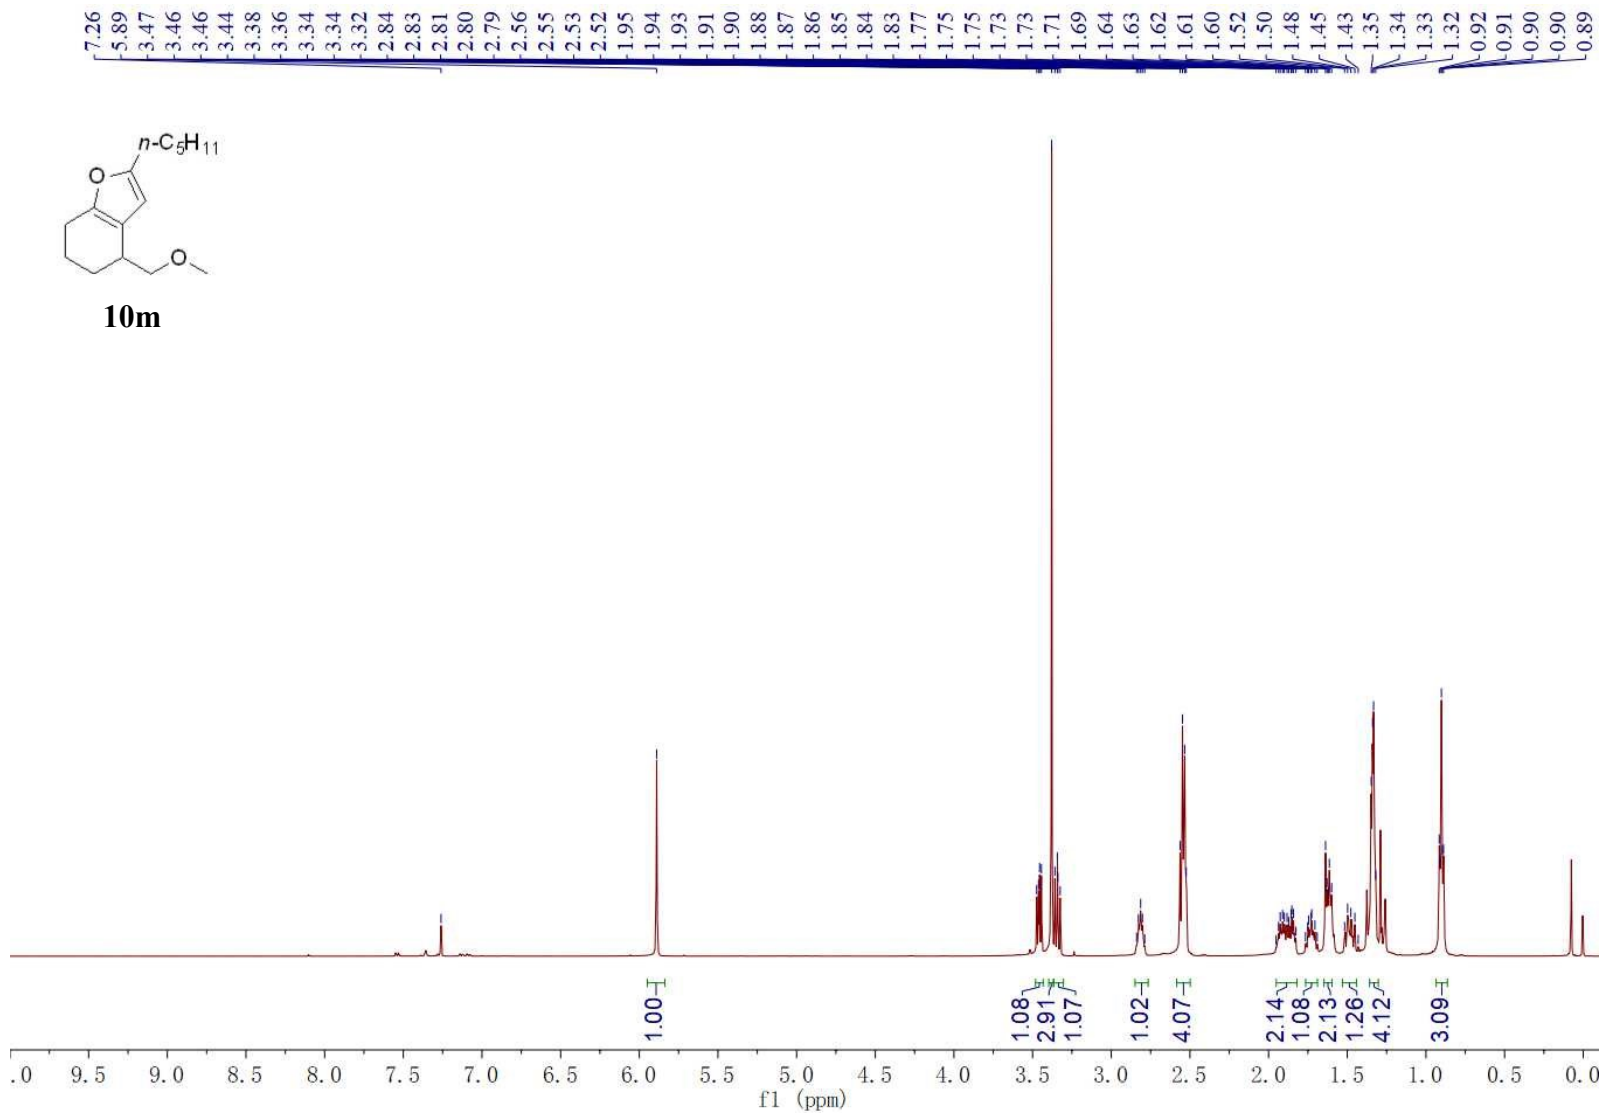

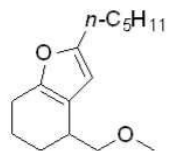

**10m**

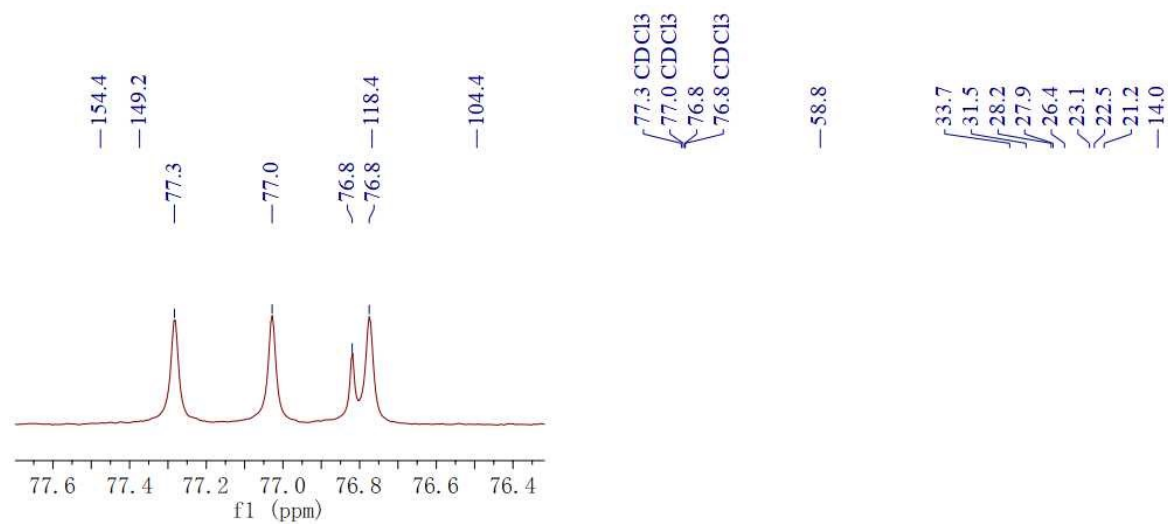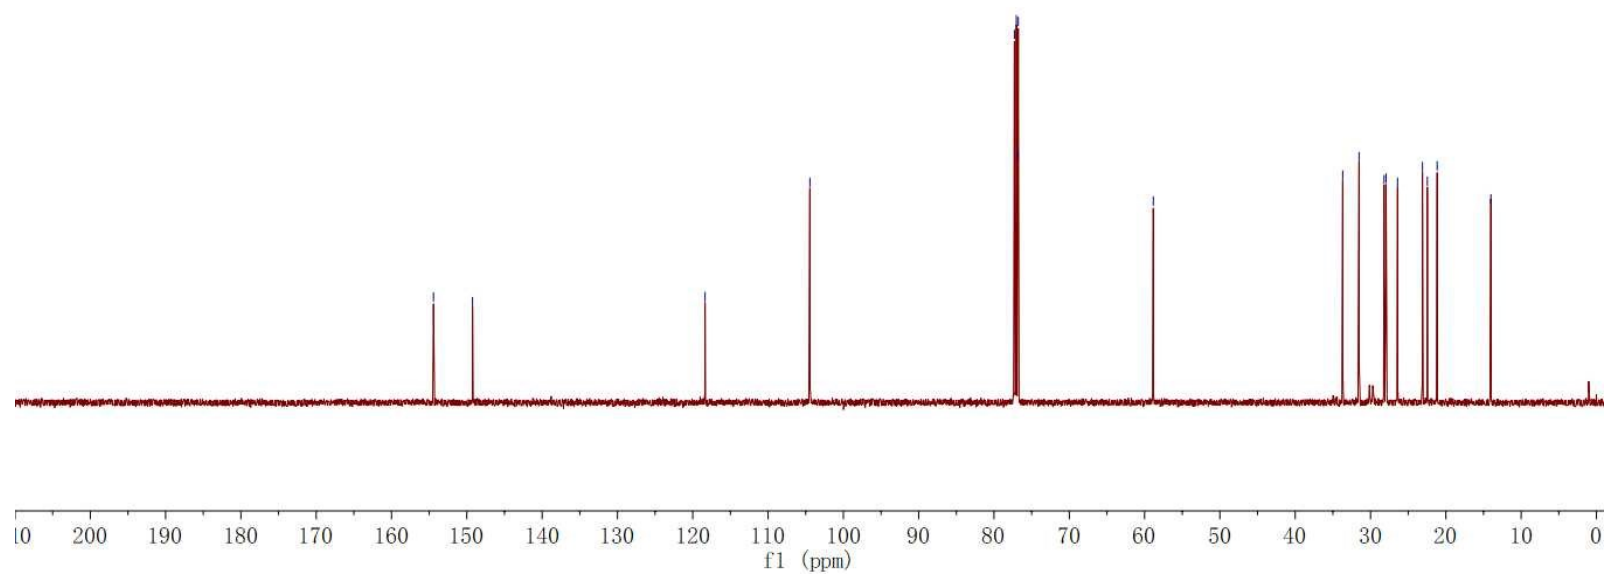

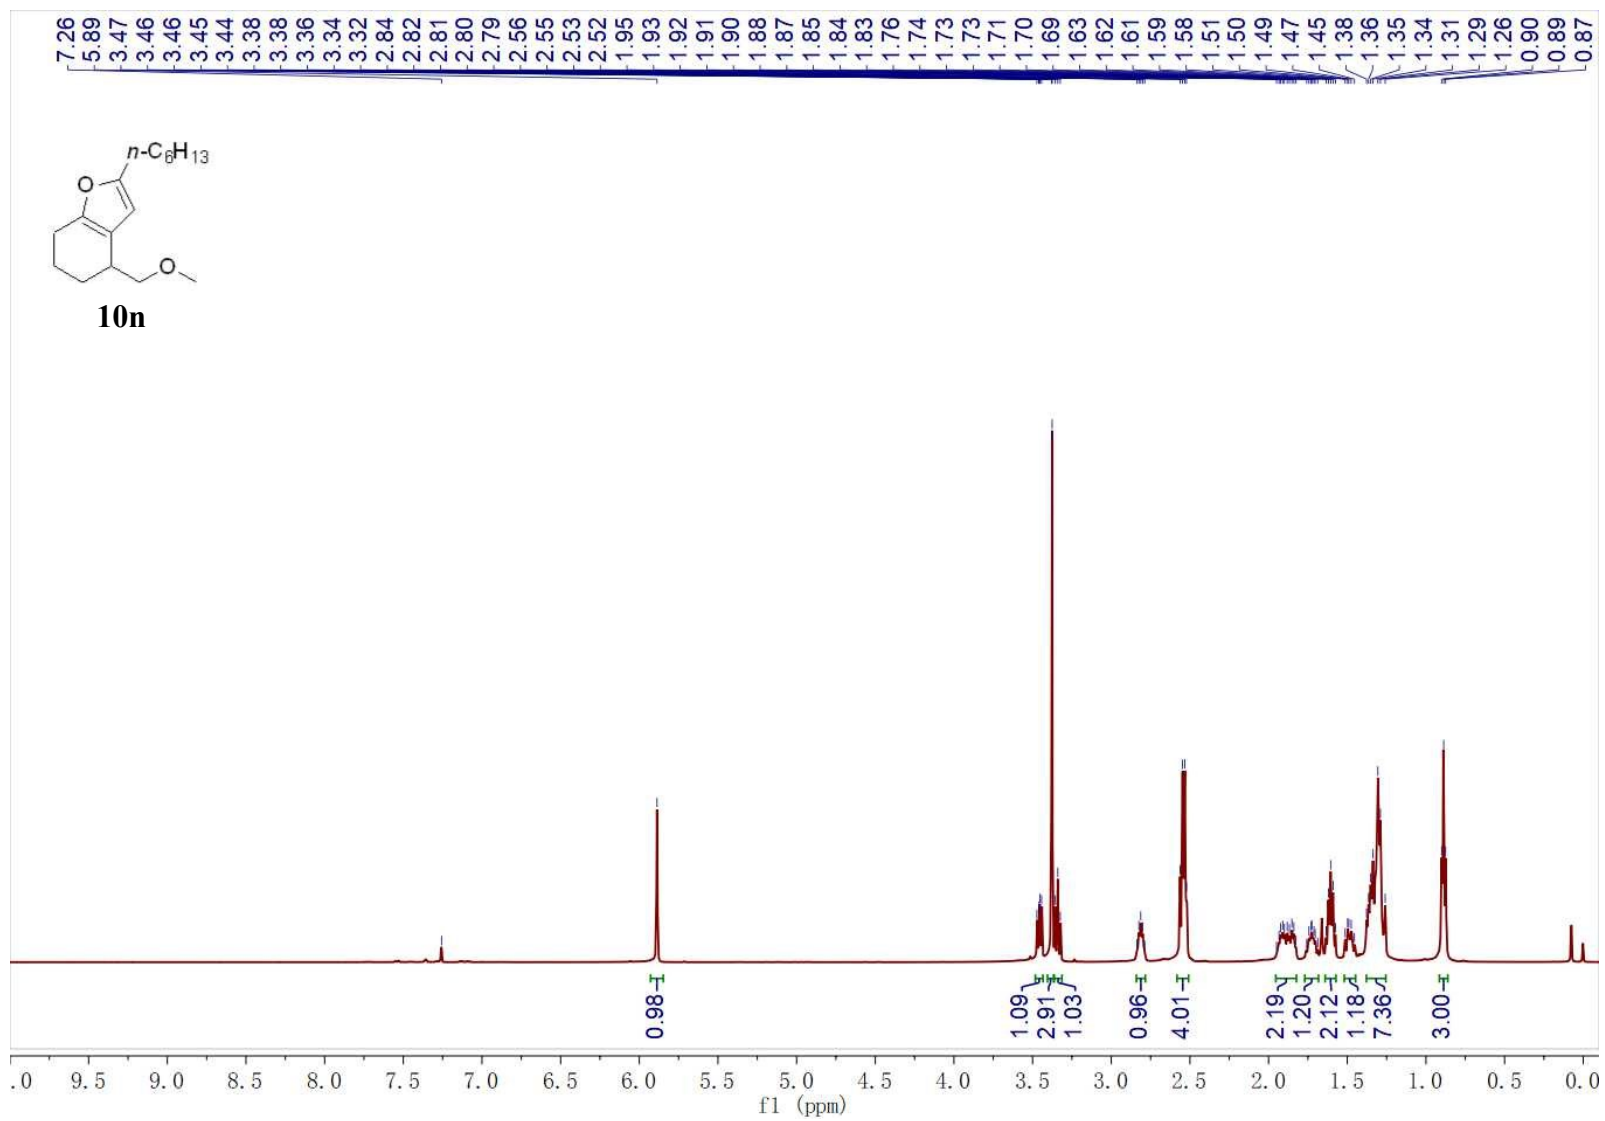

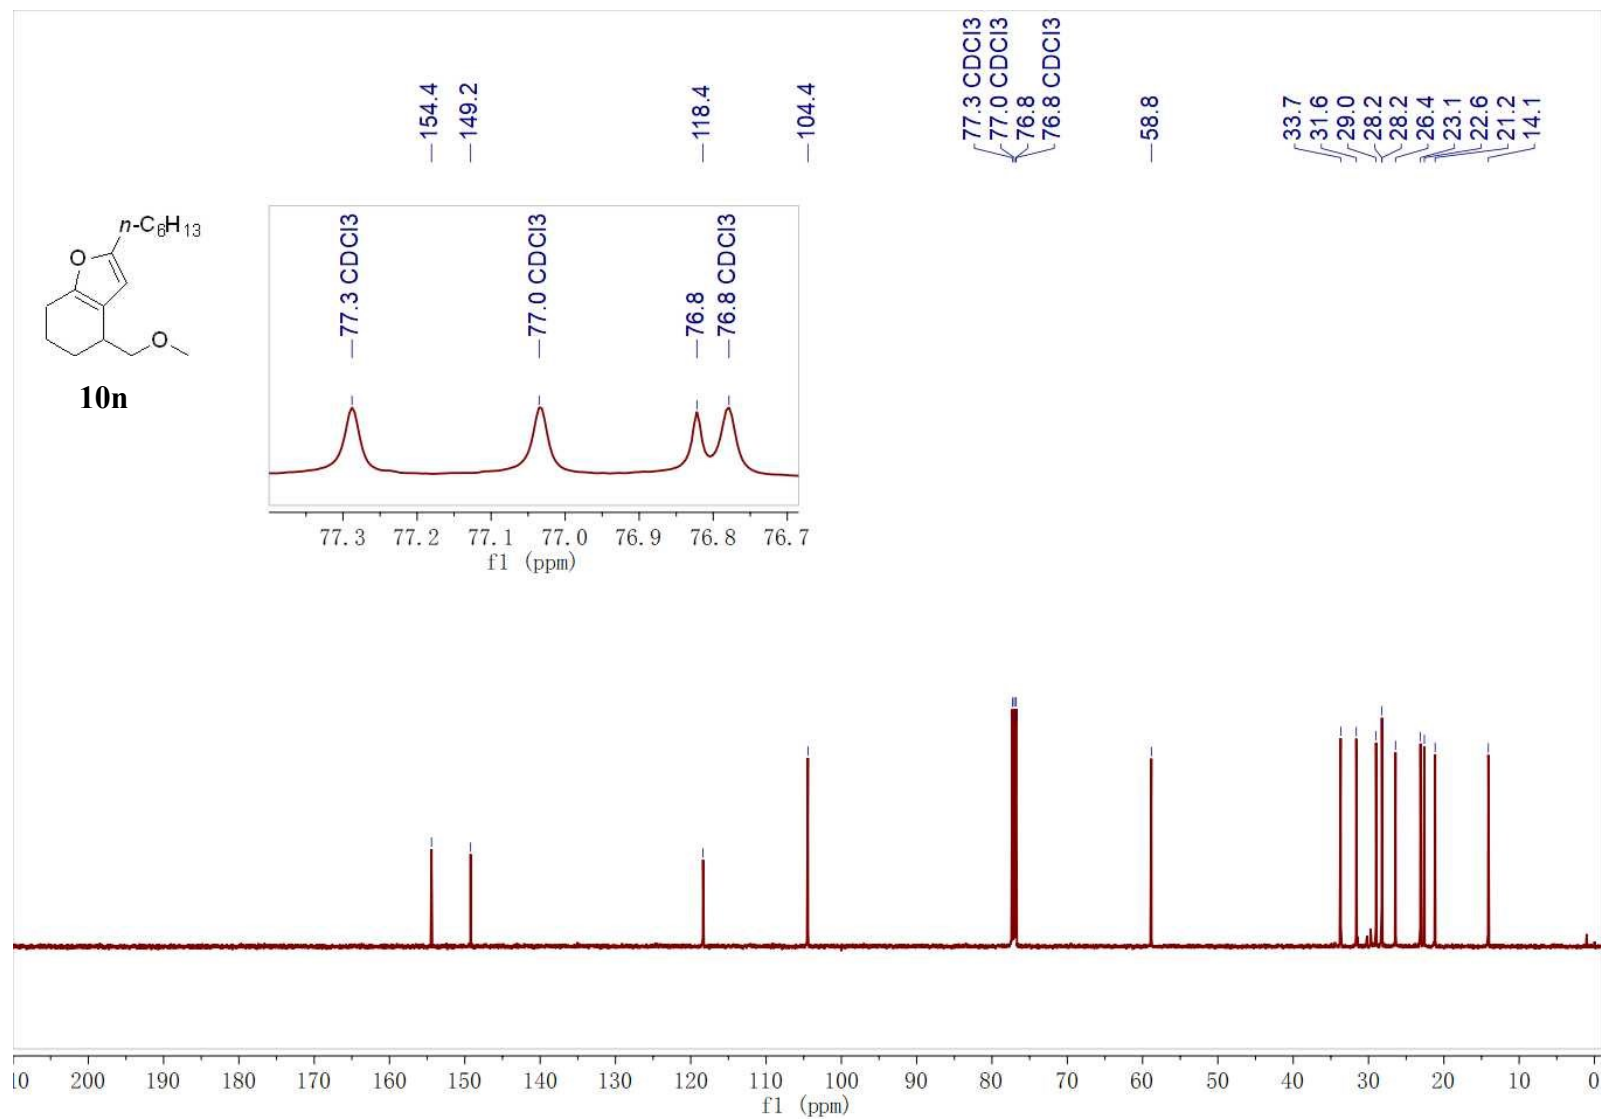

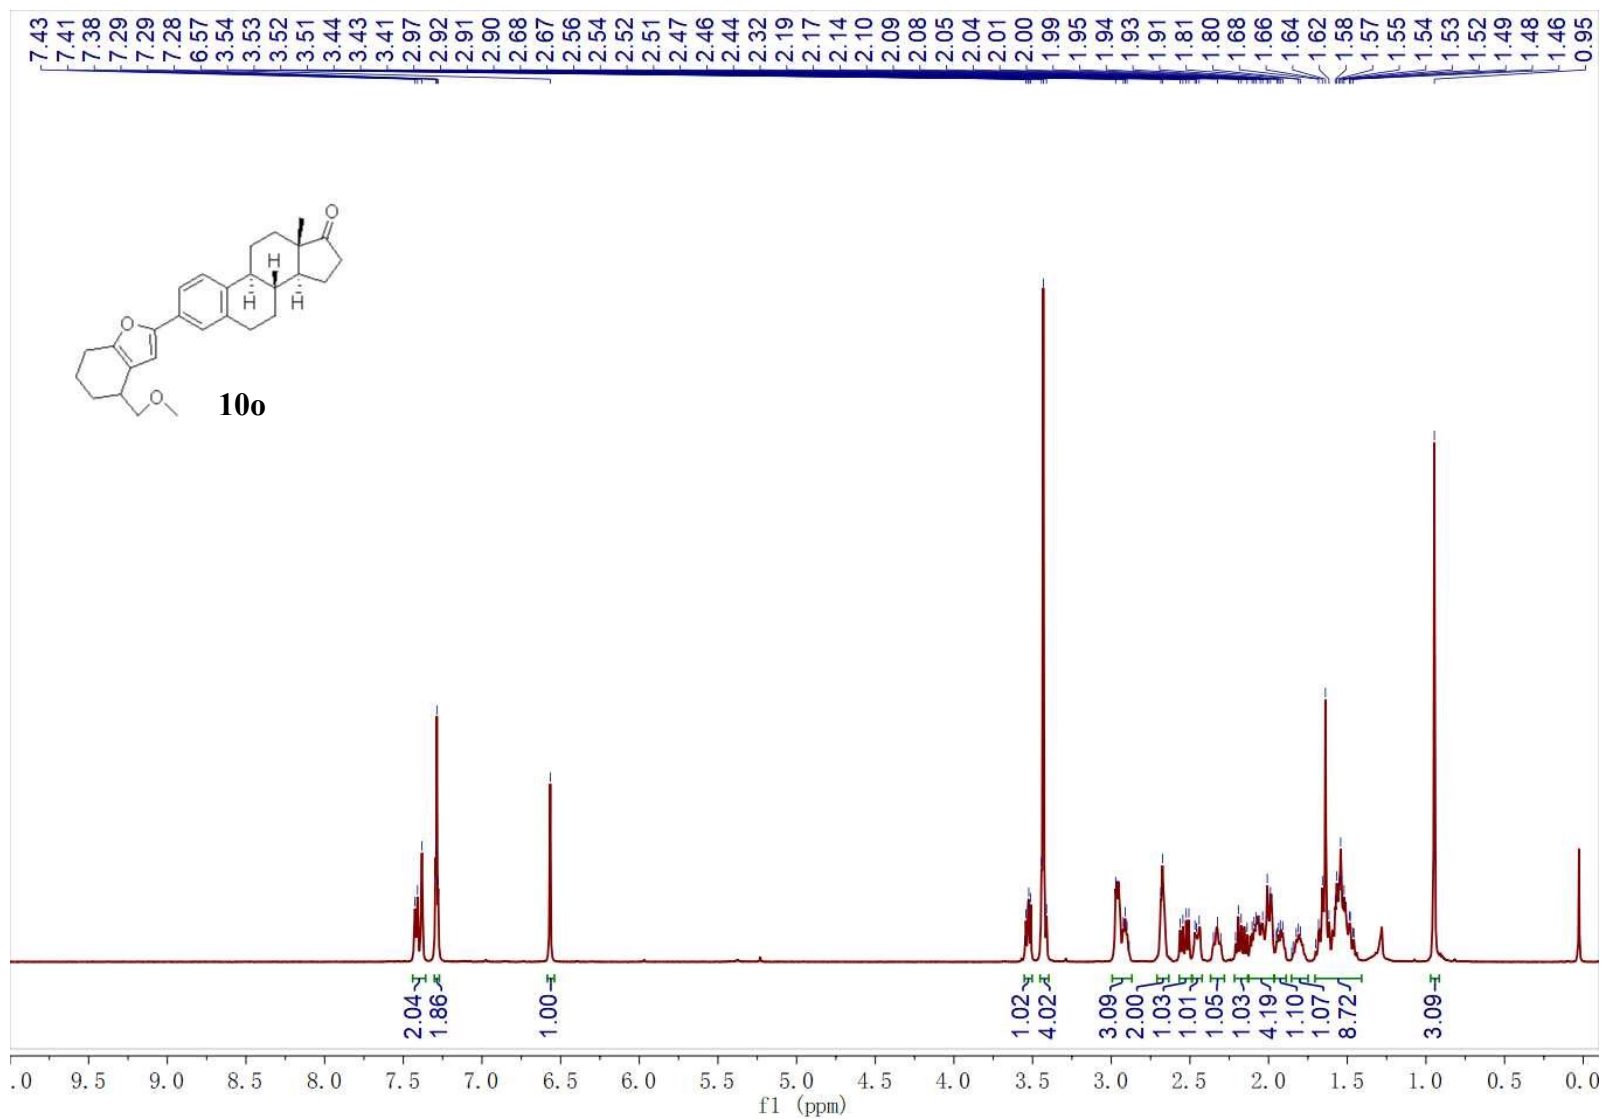

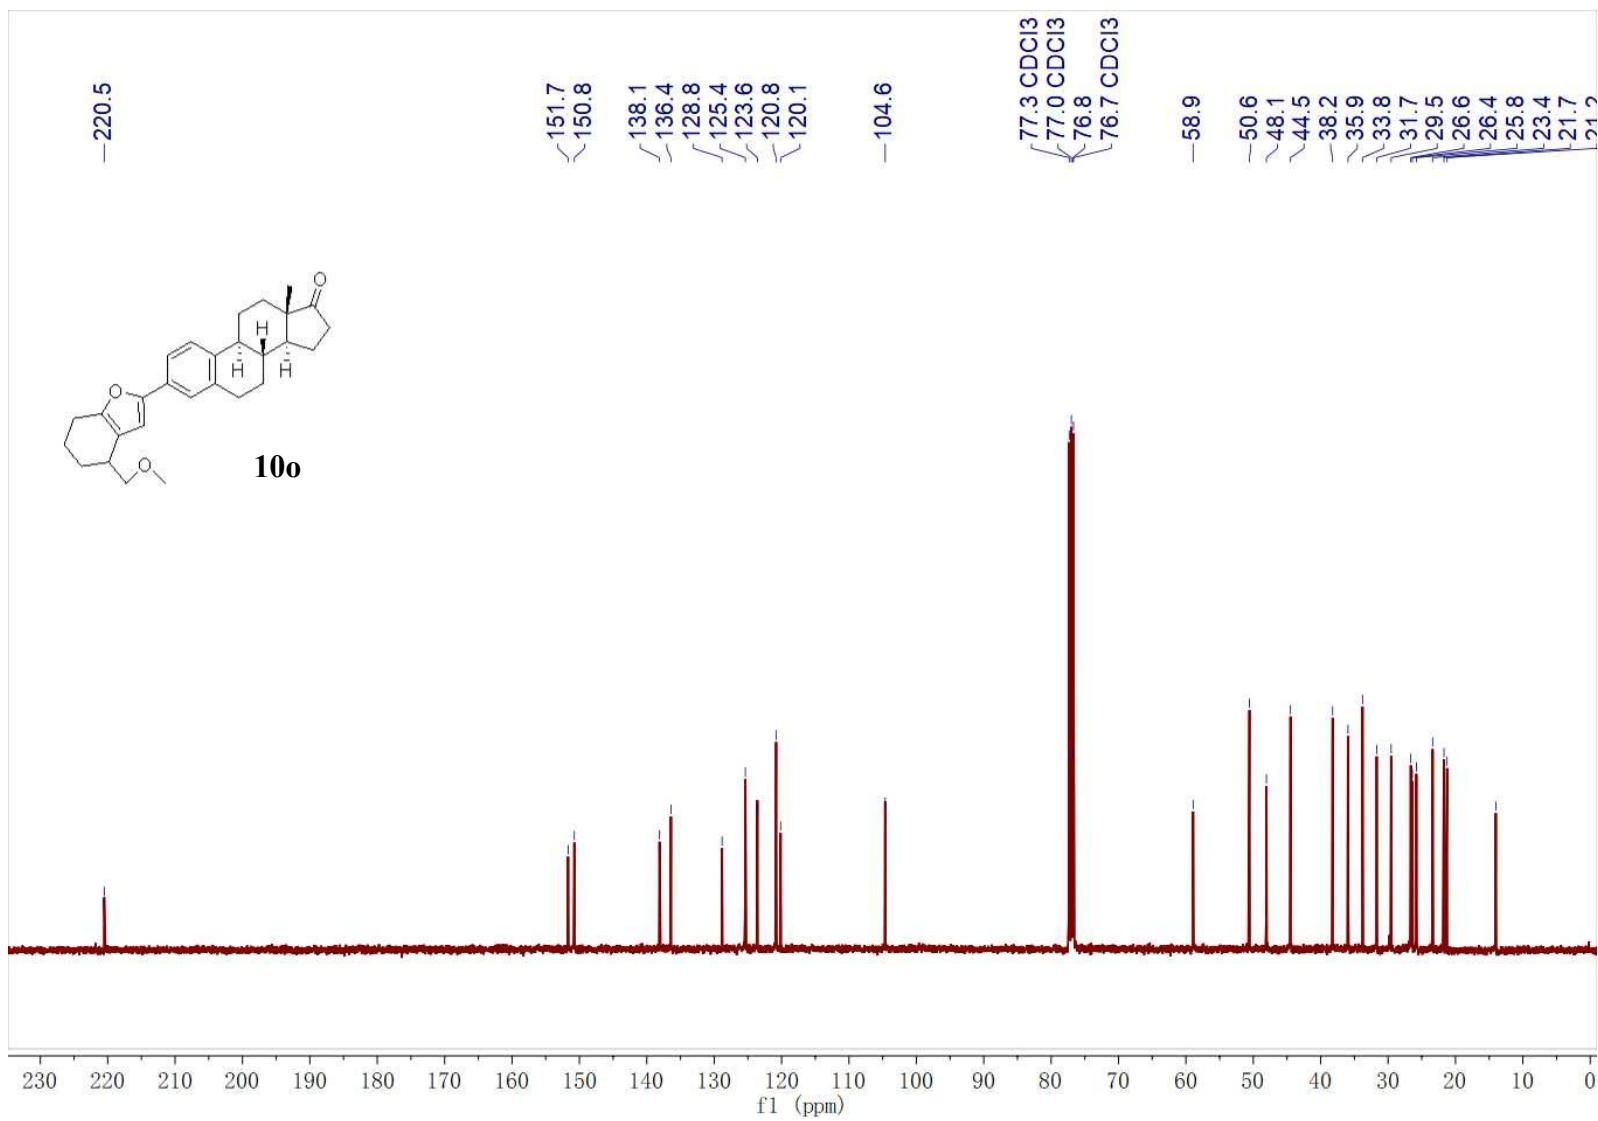

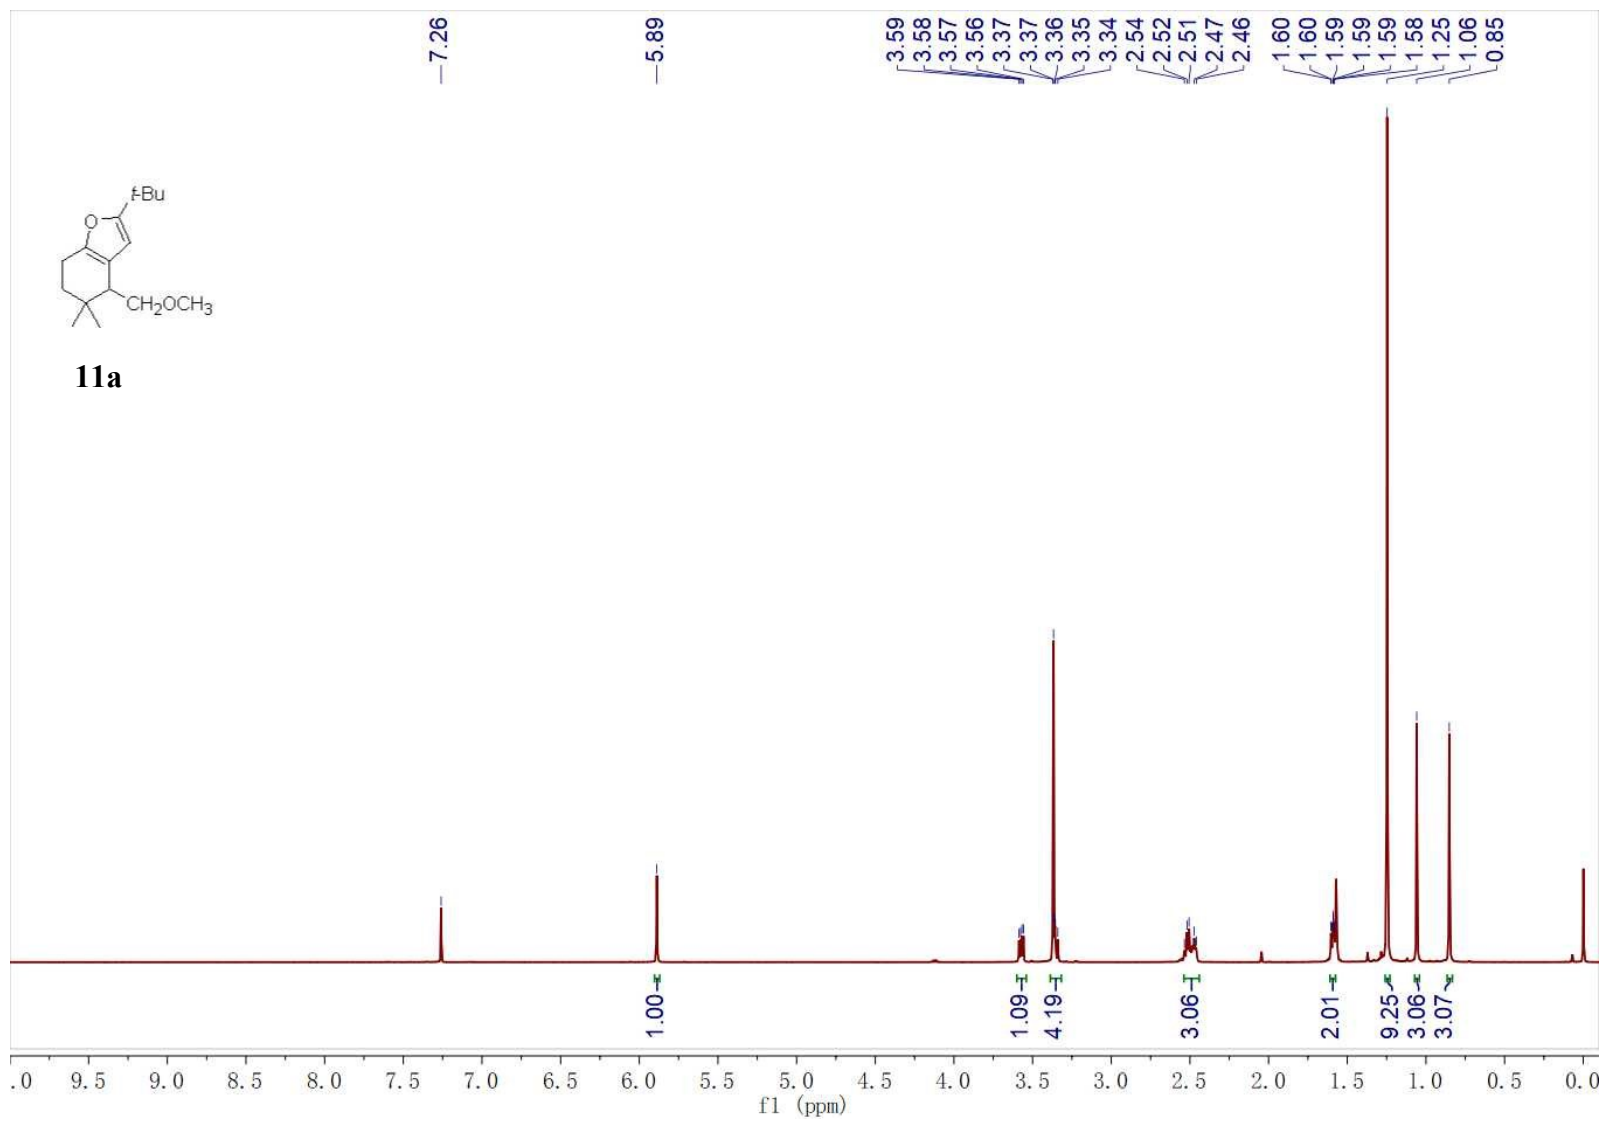



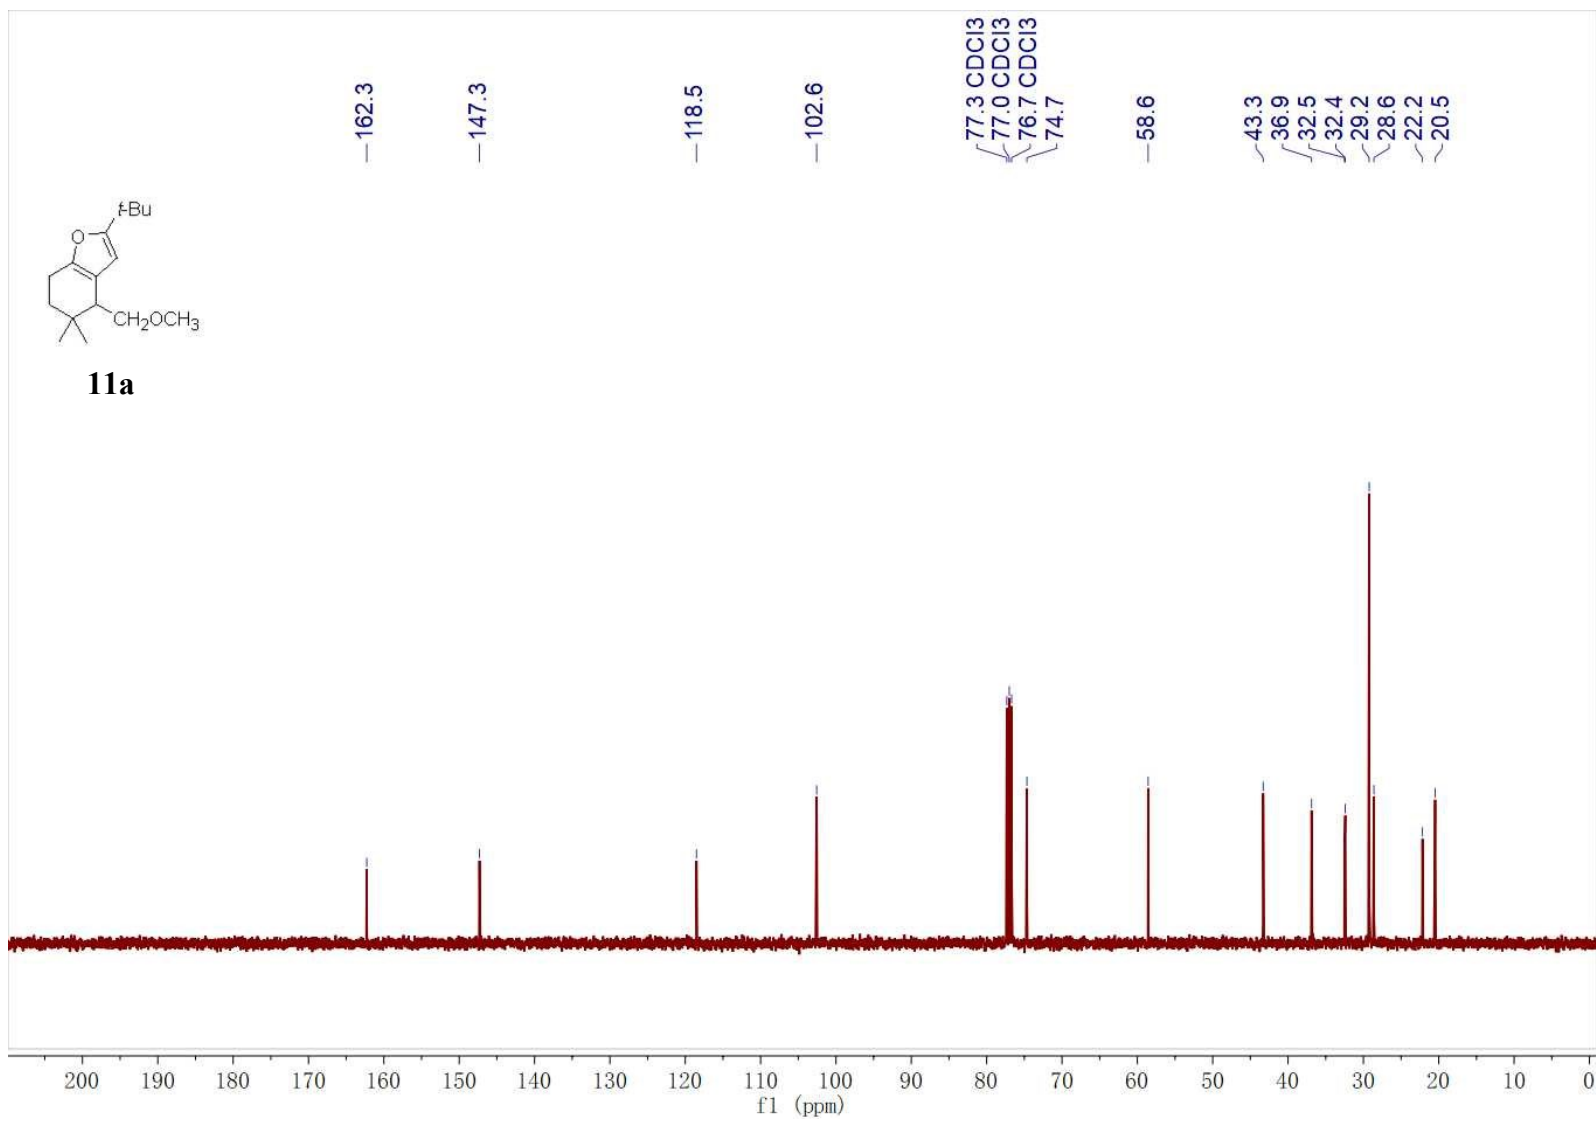

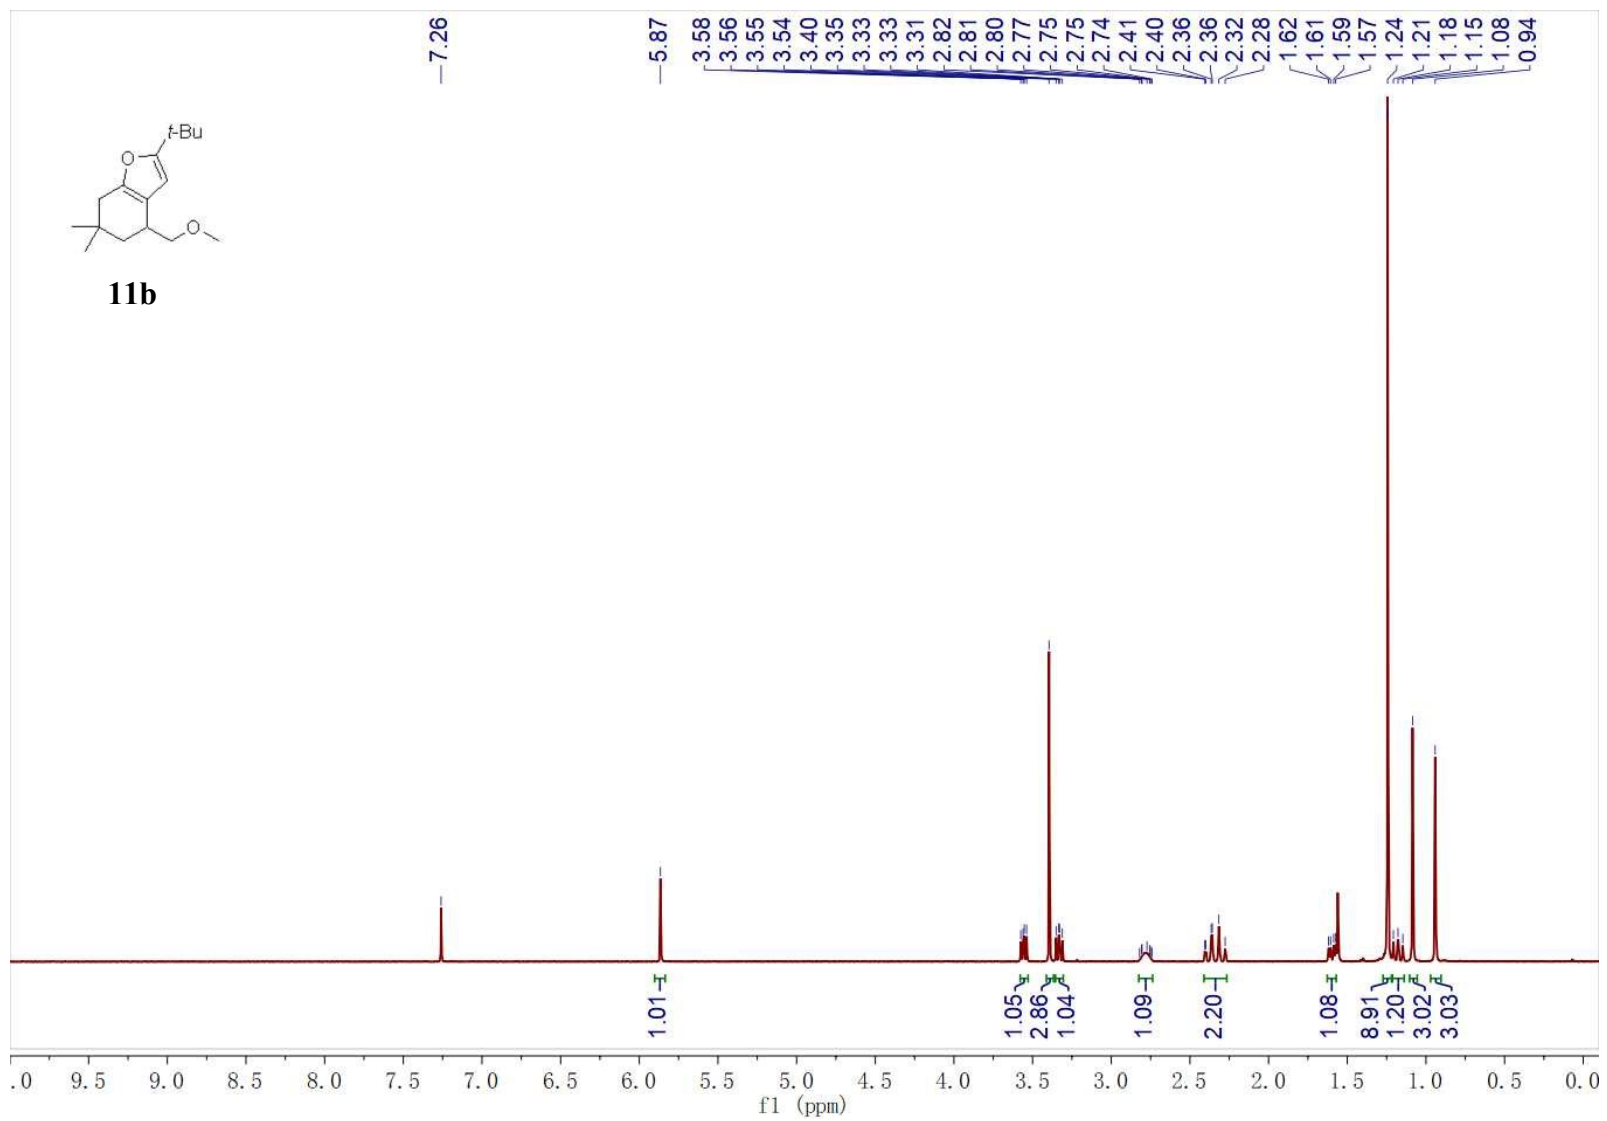

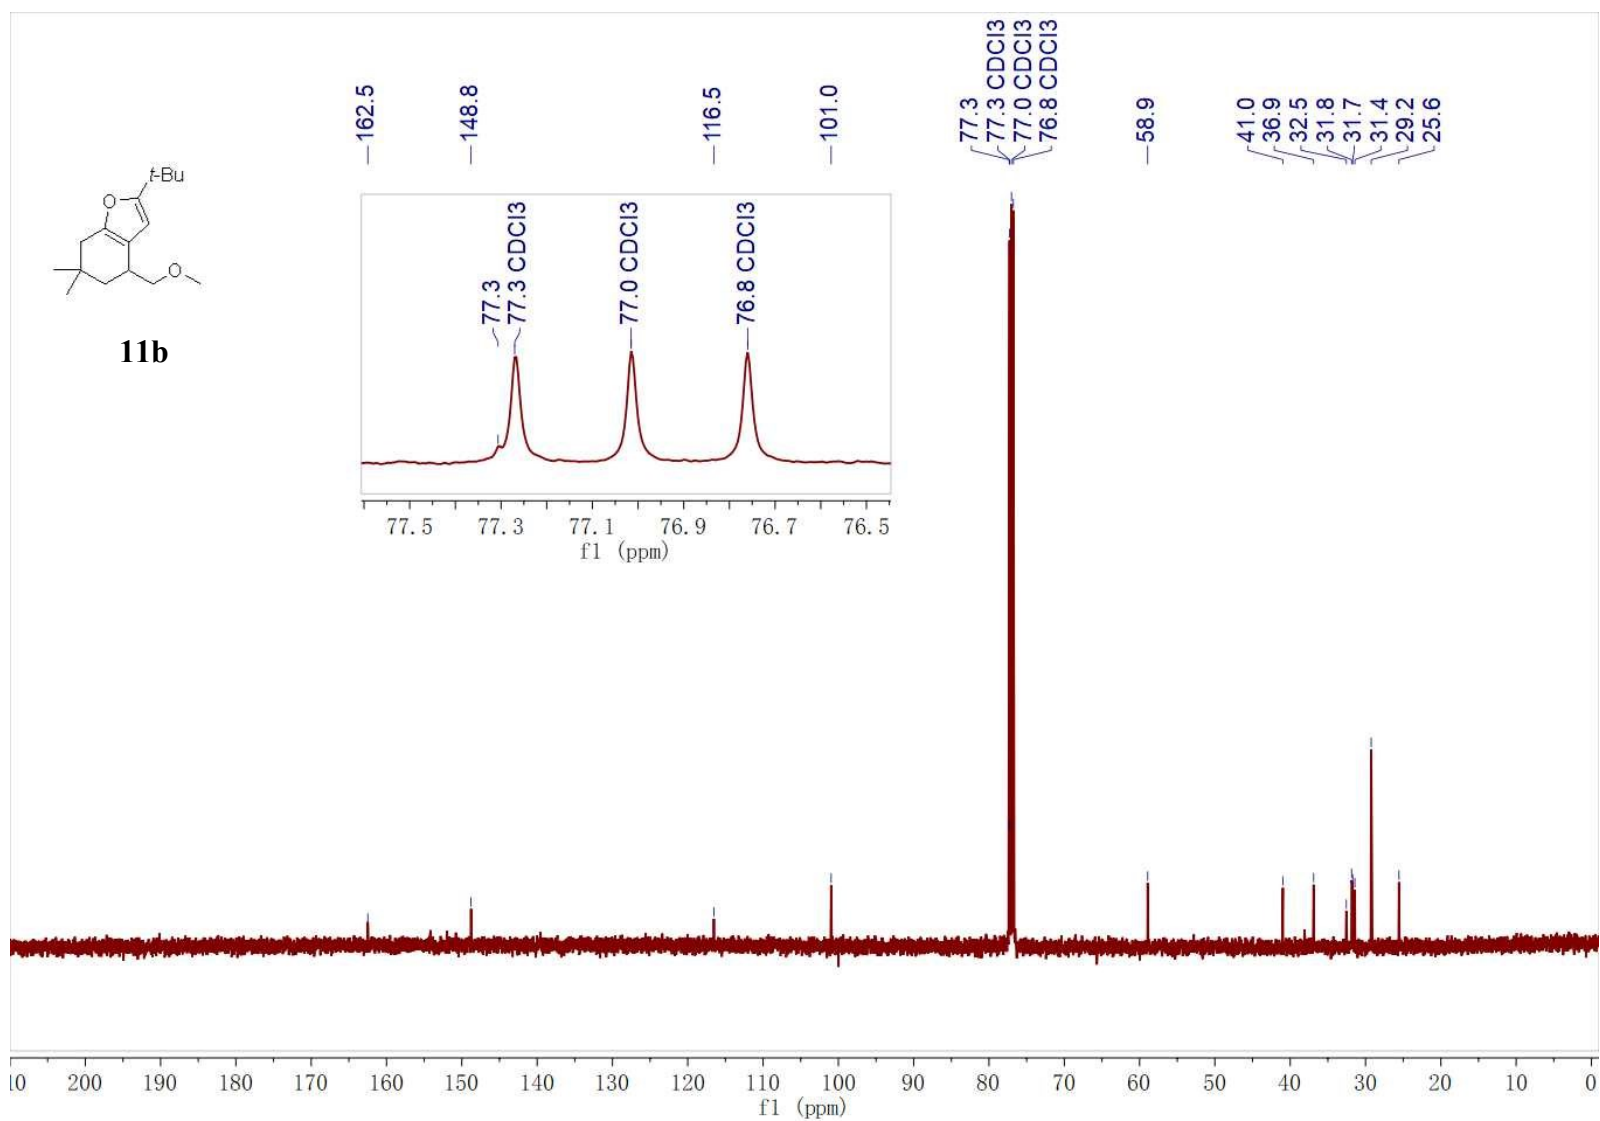

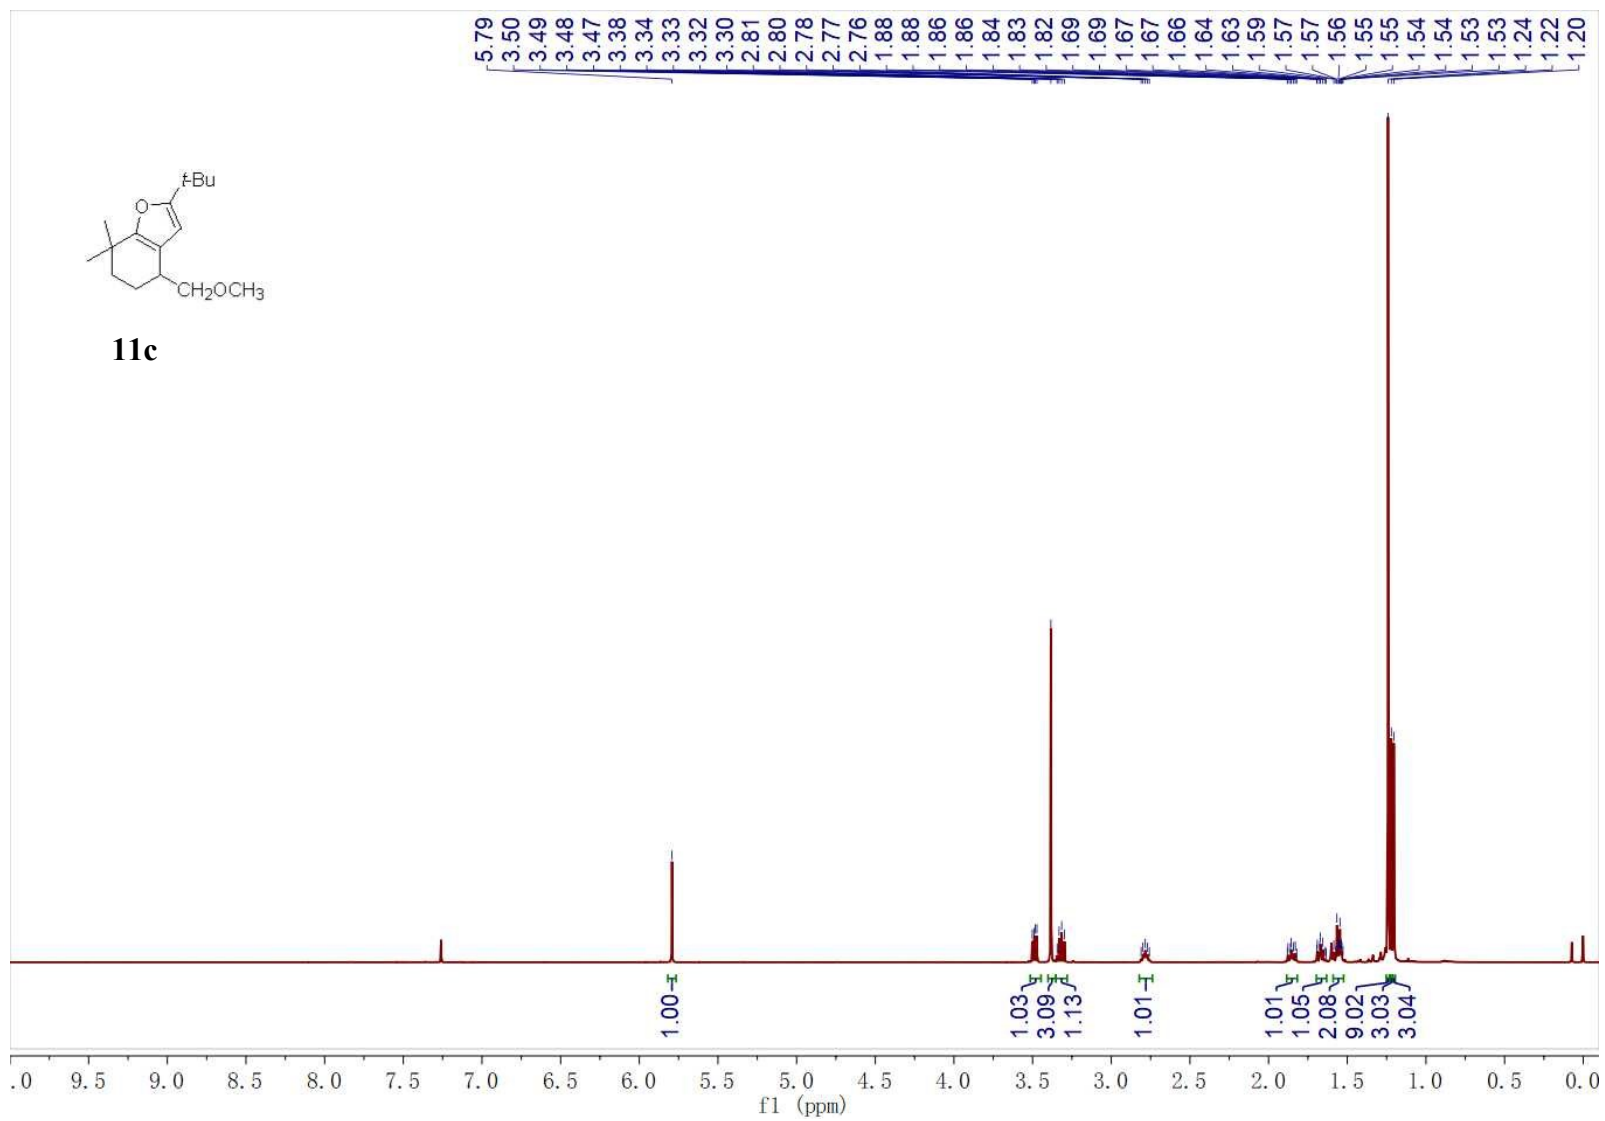

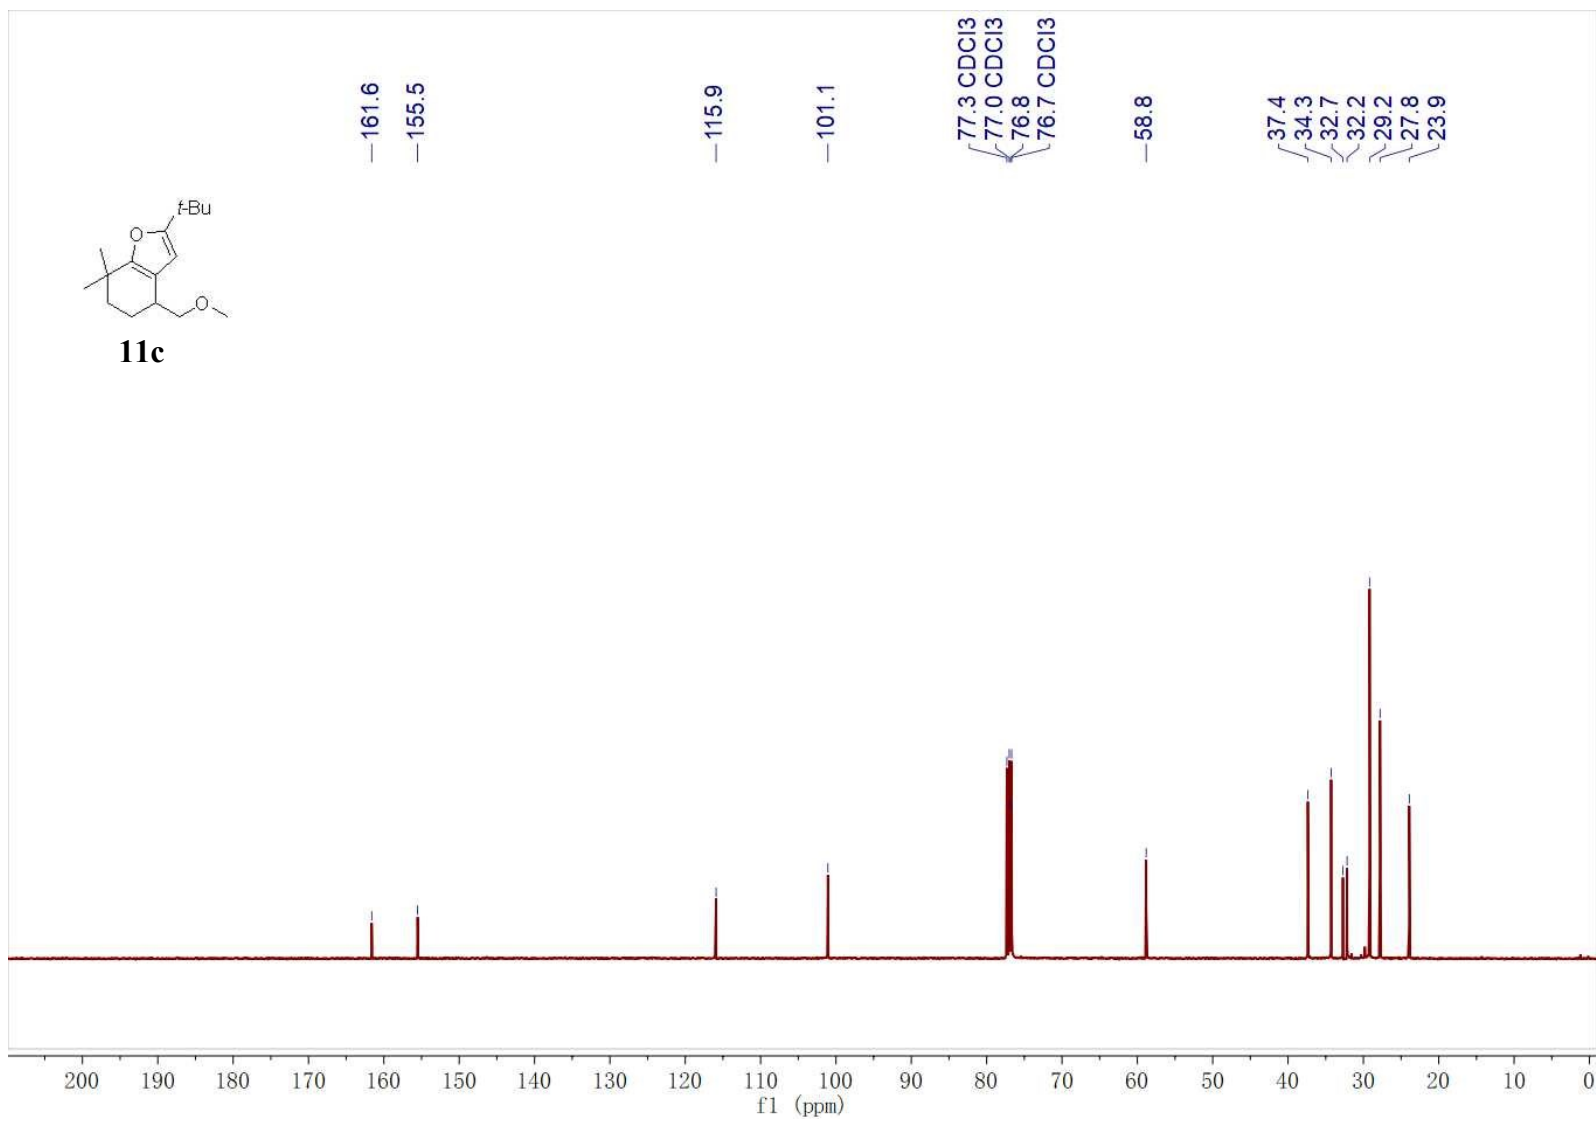

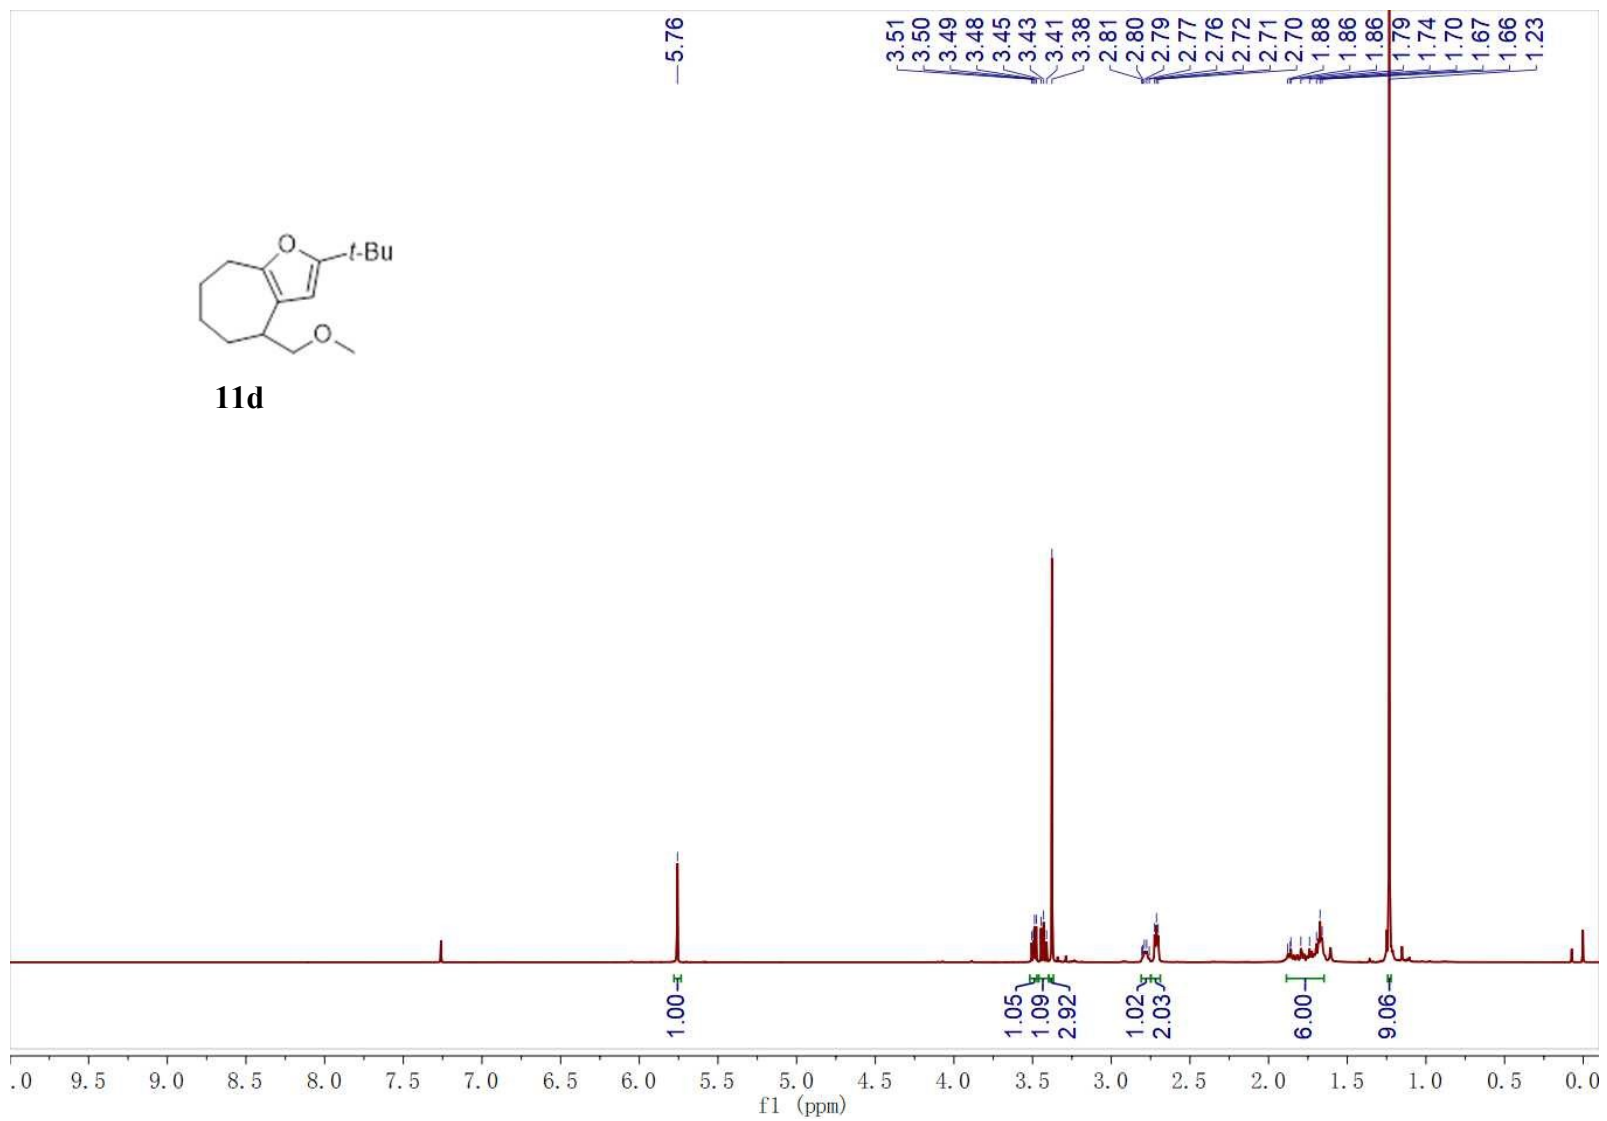

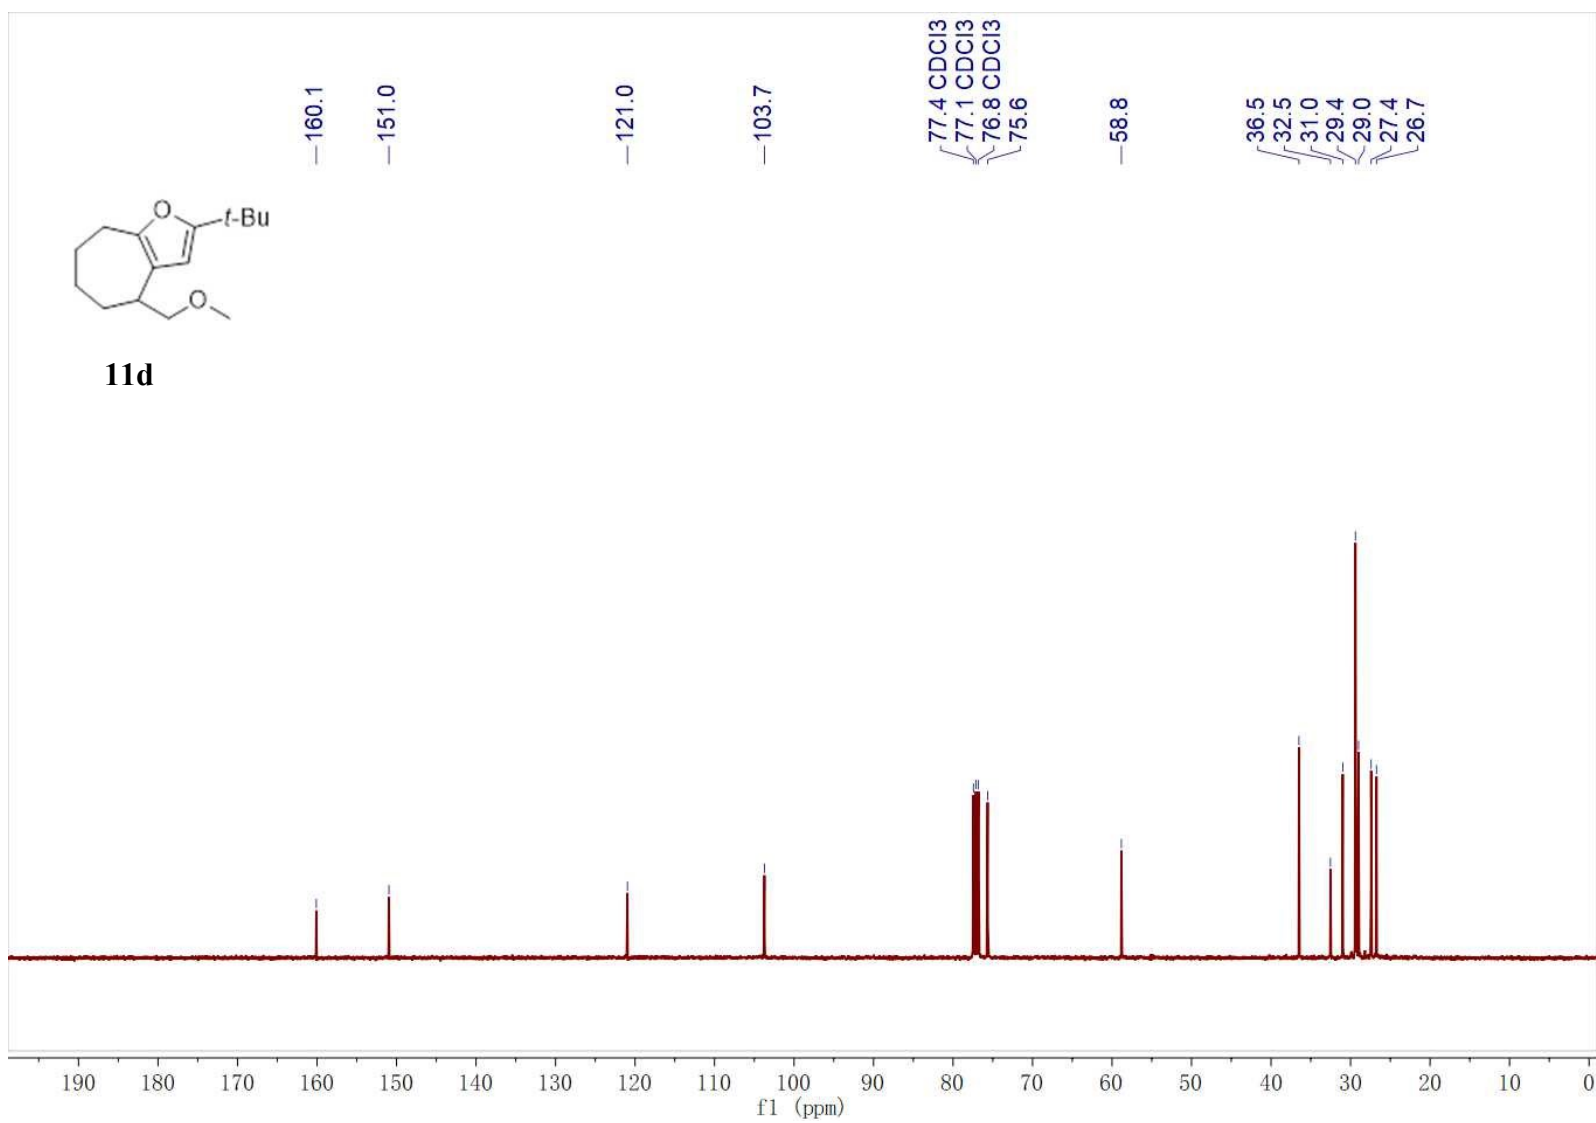

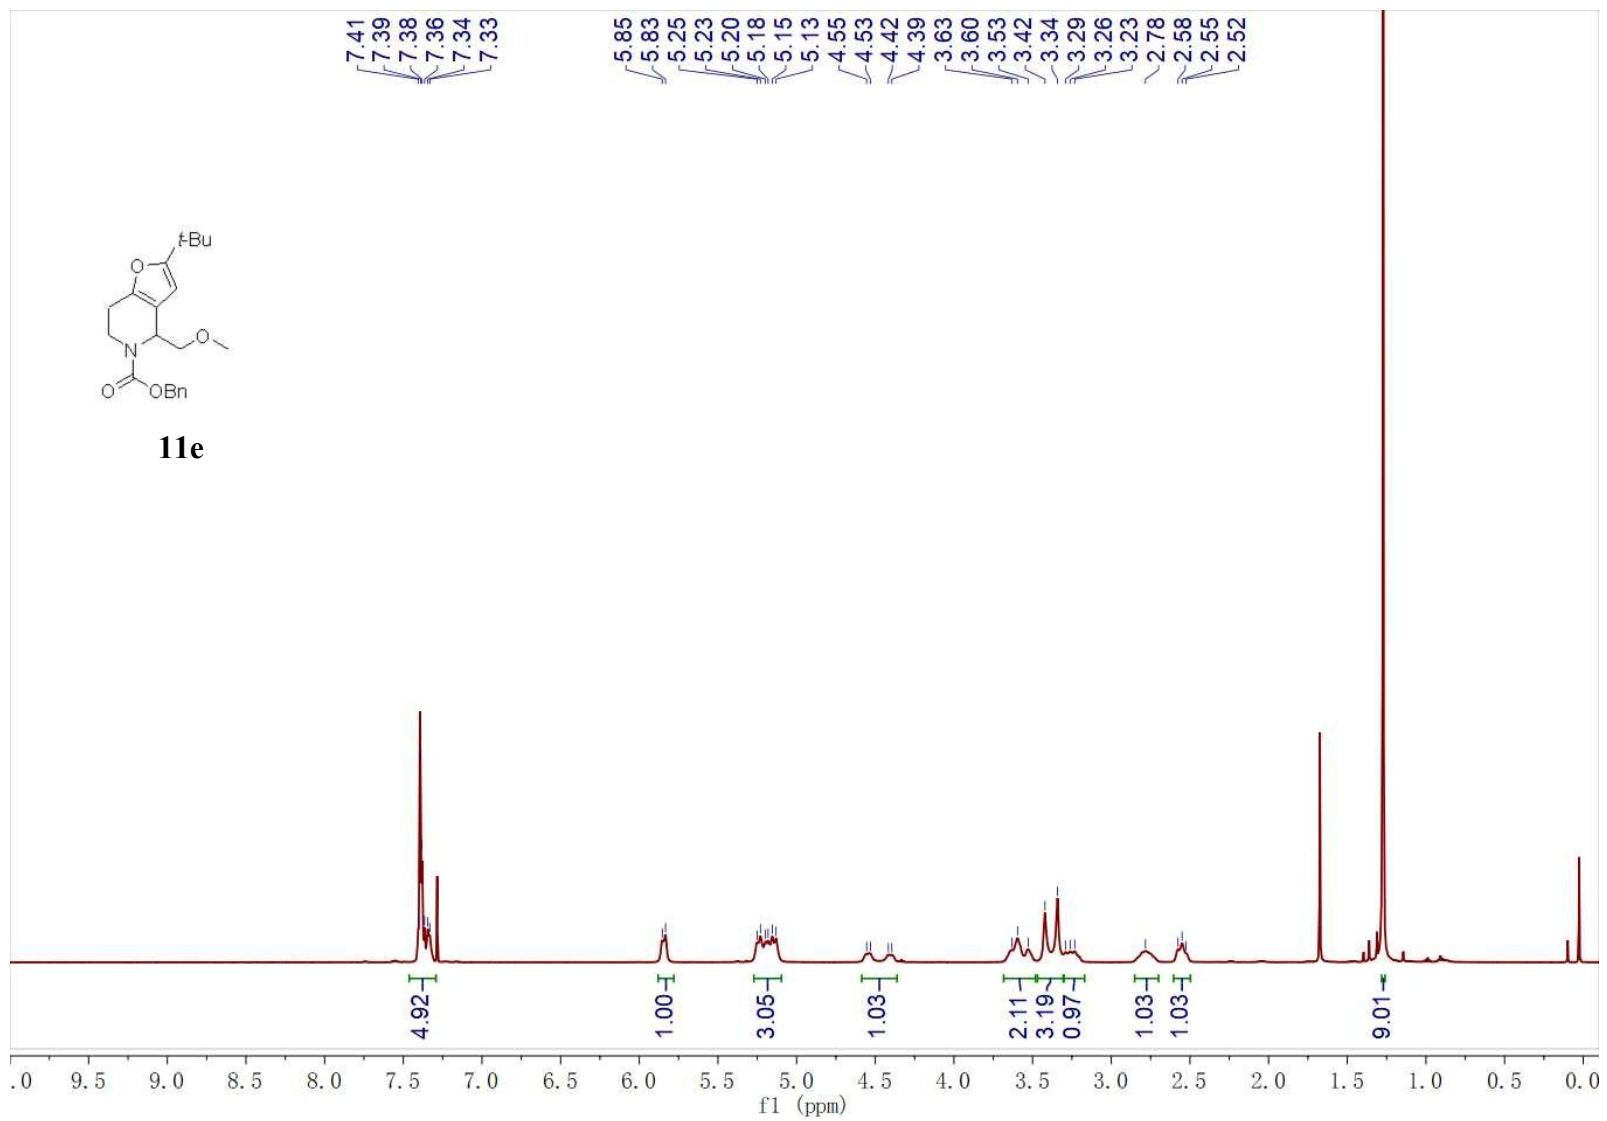



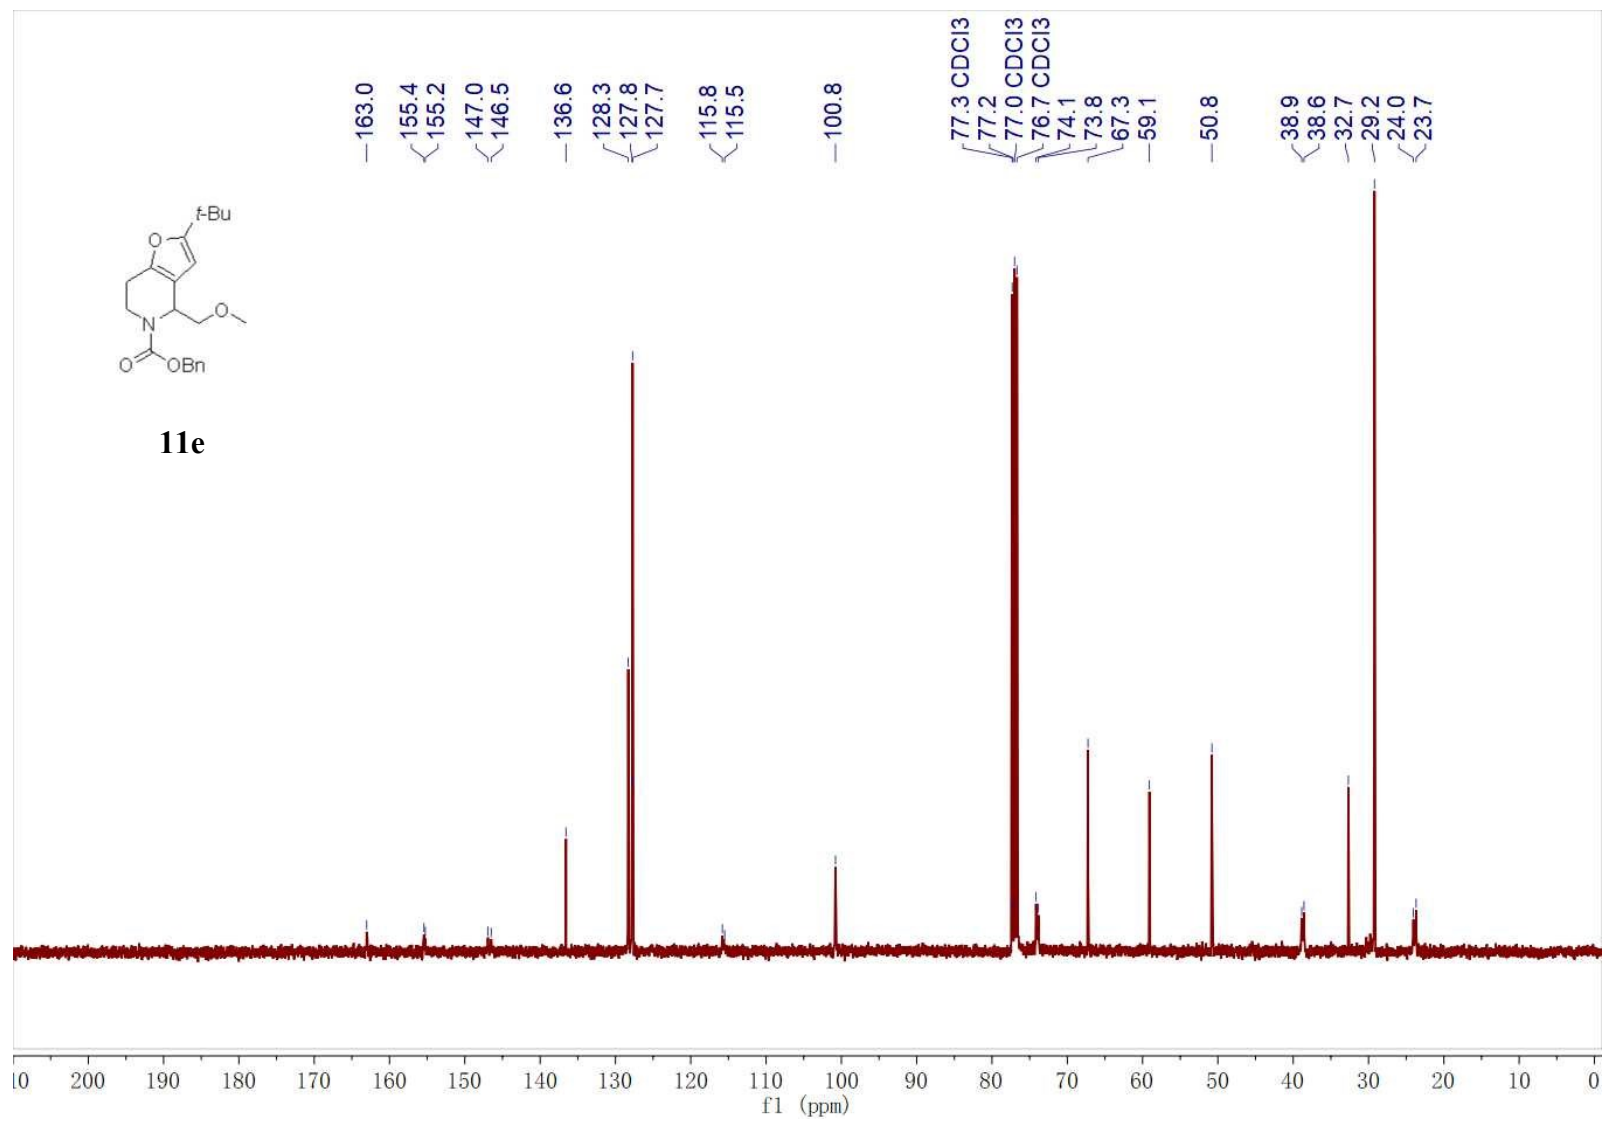

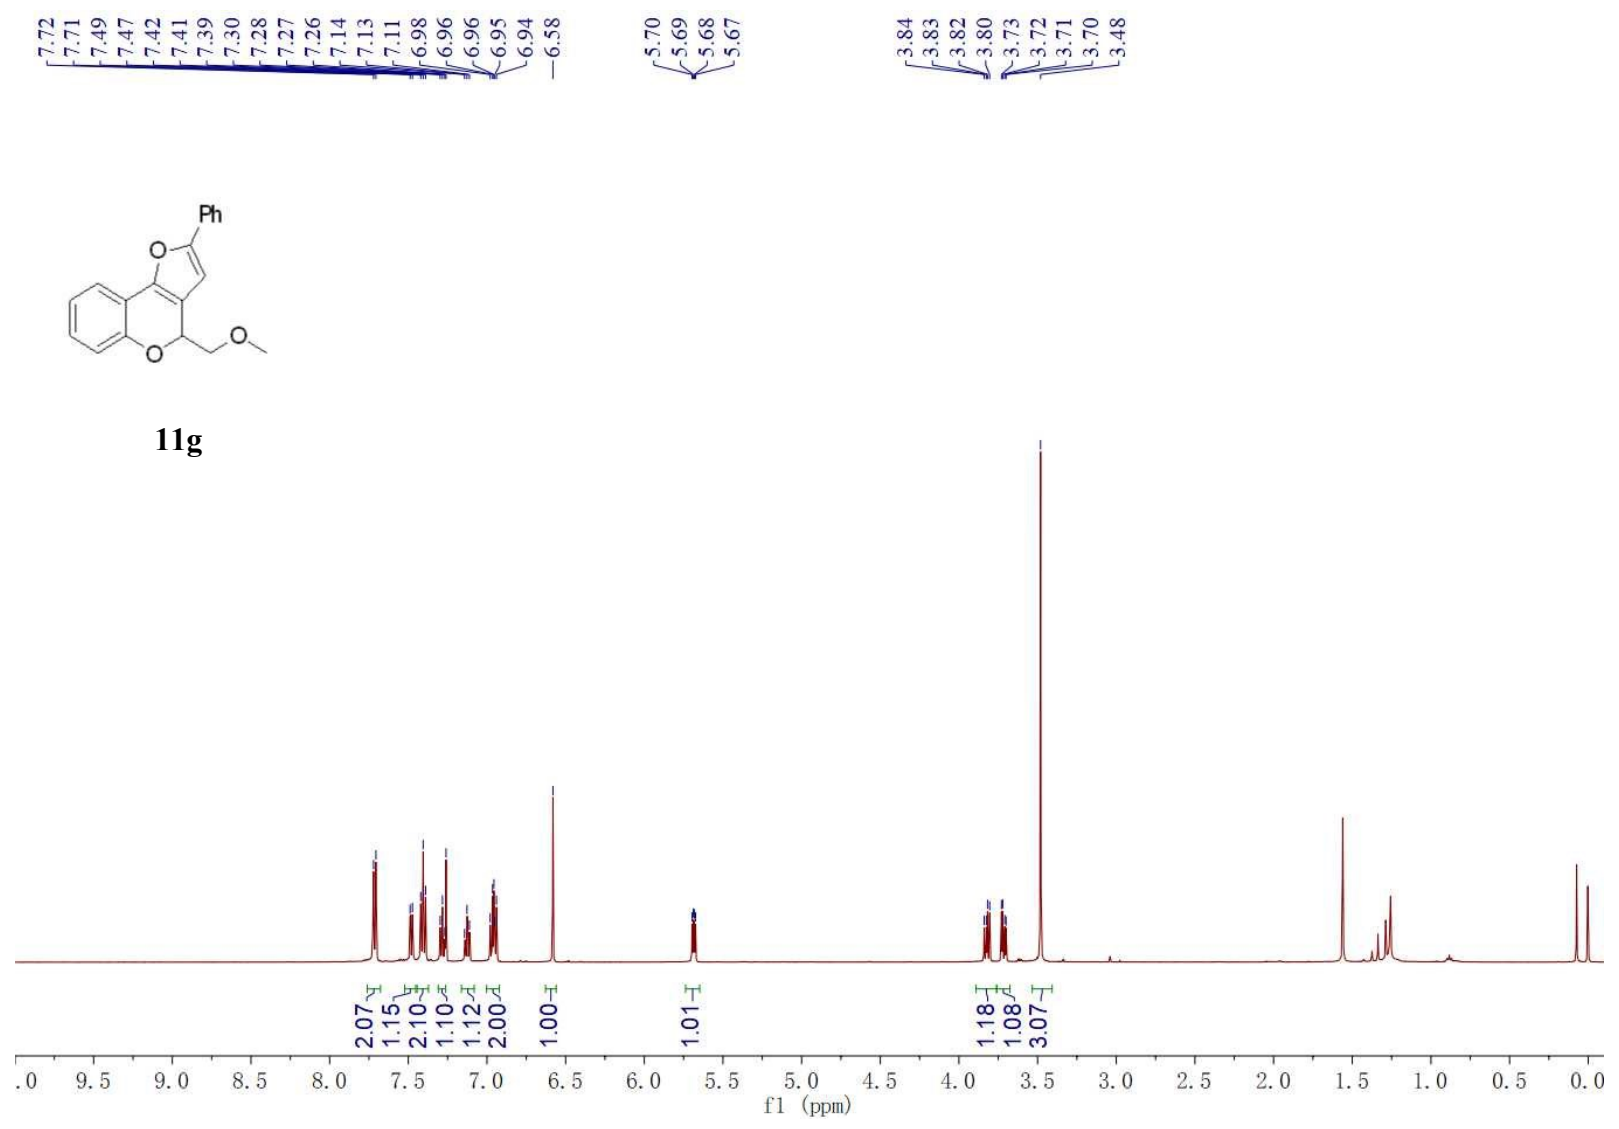

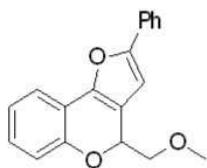

**11g**

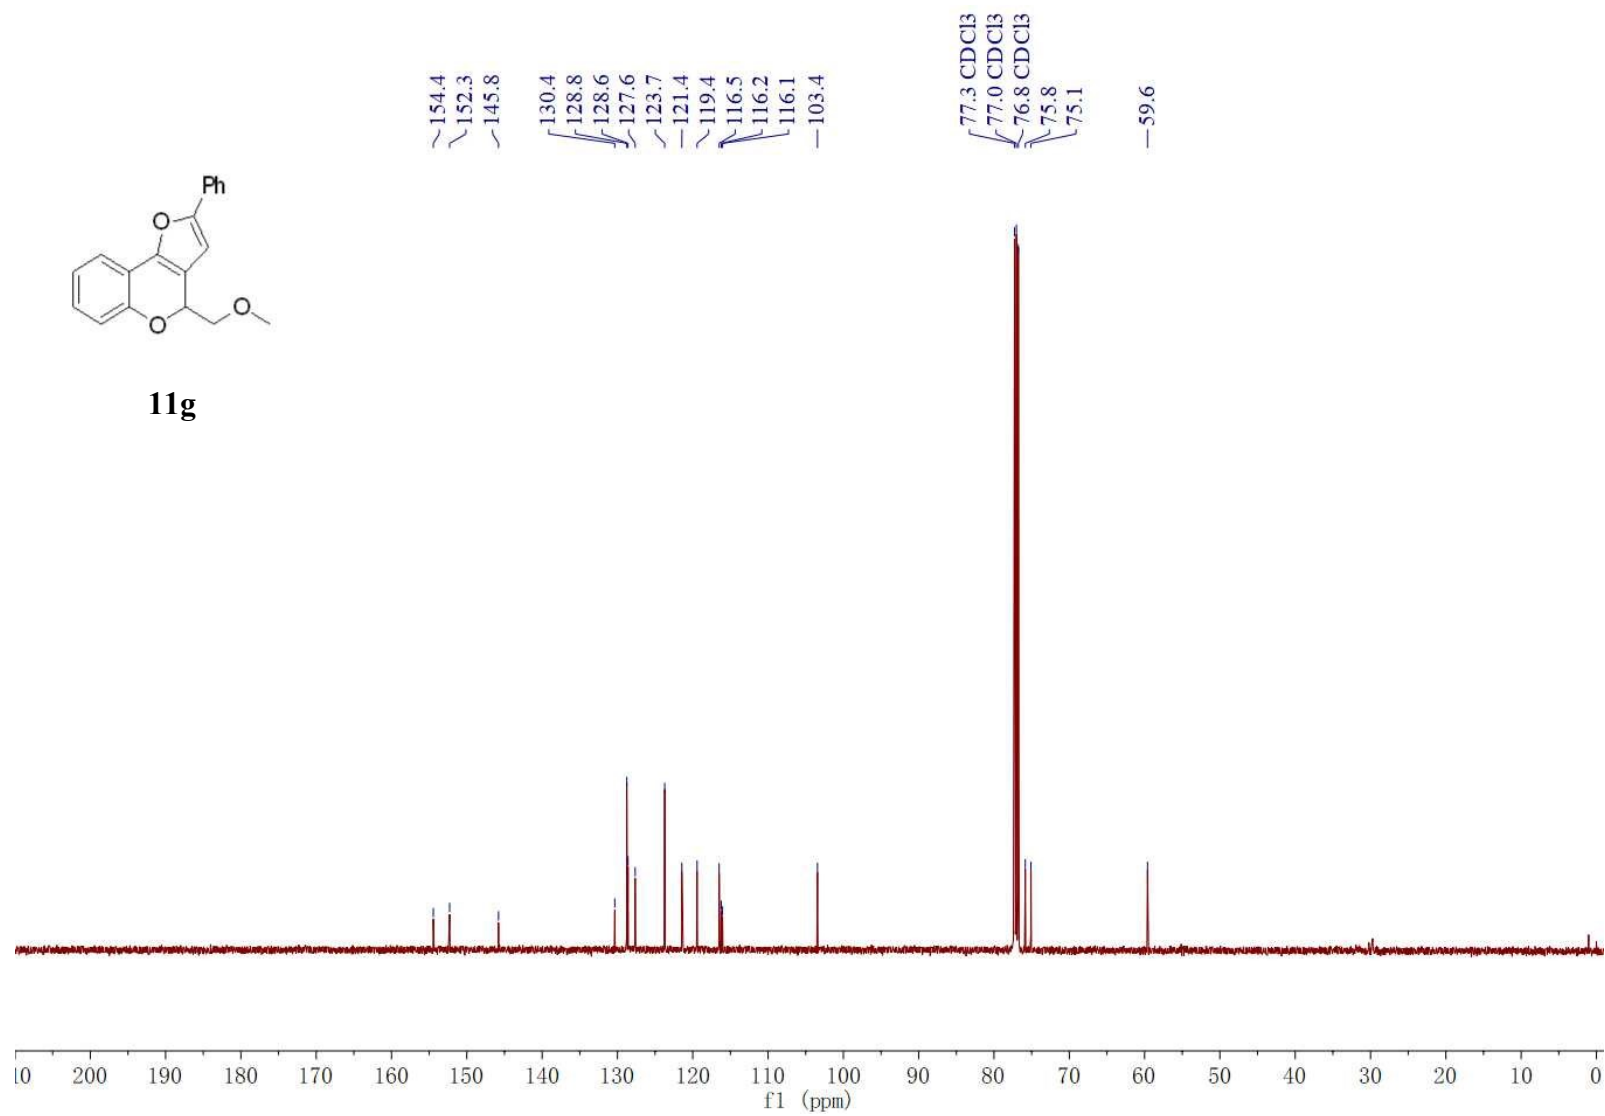

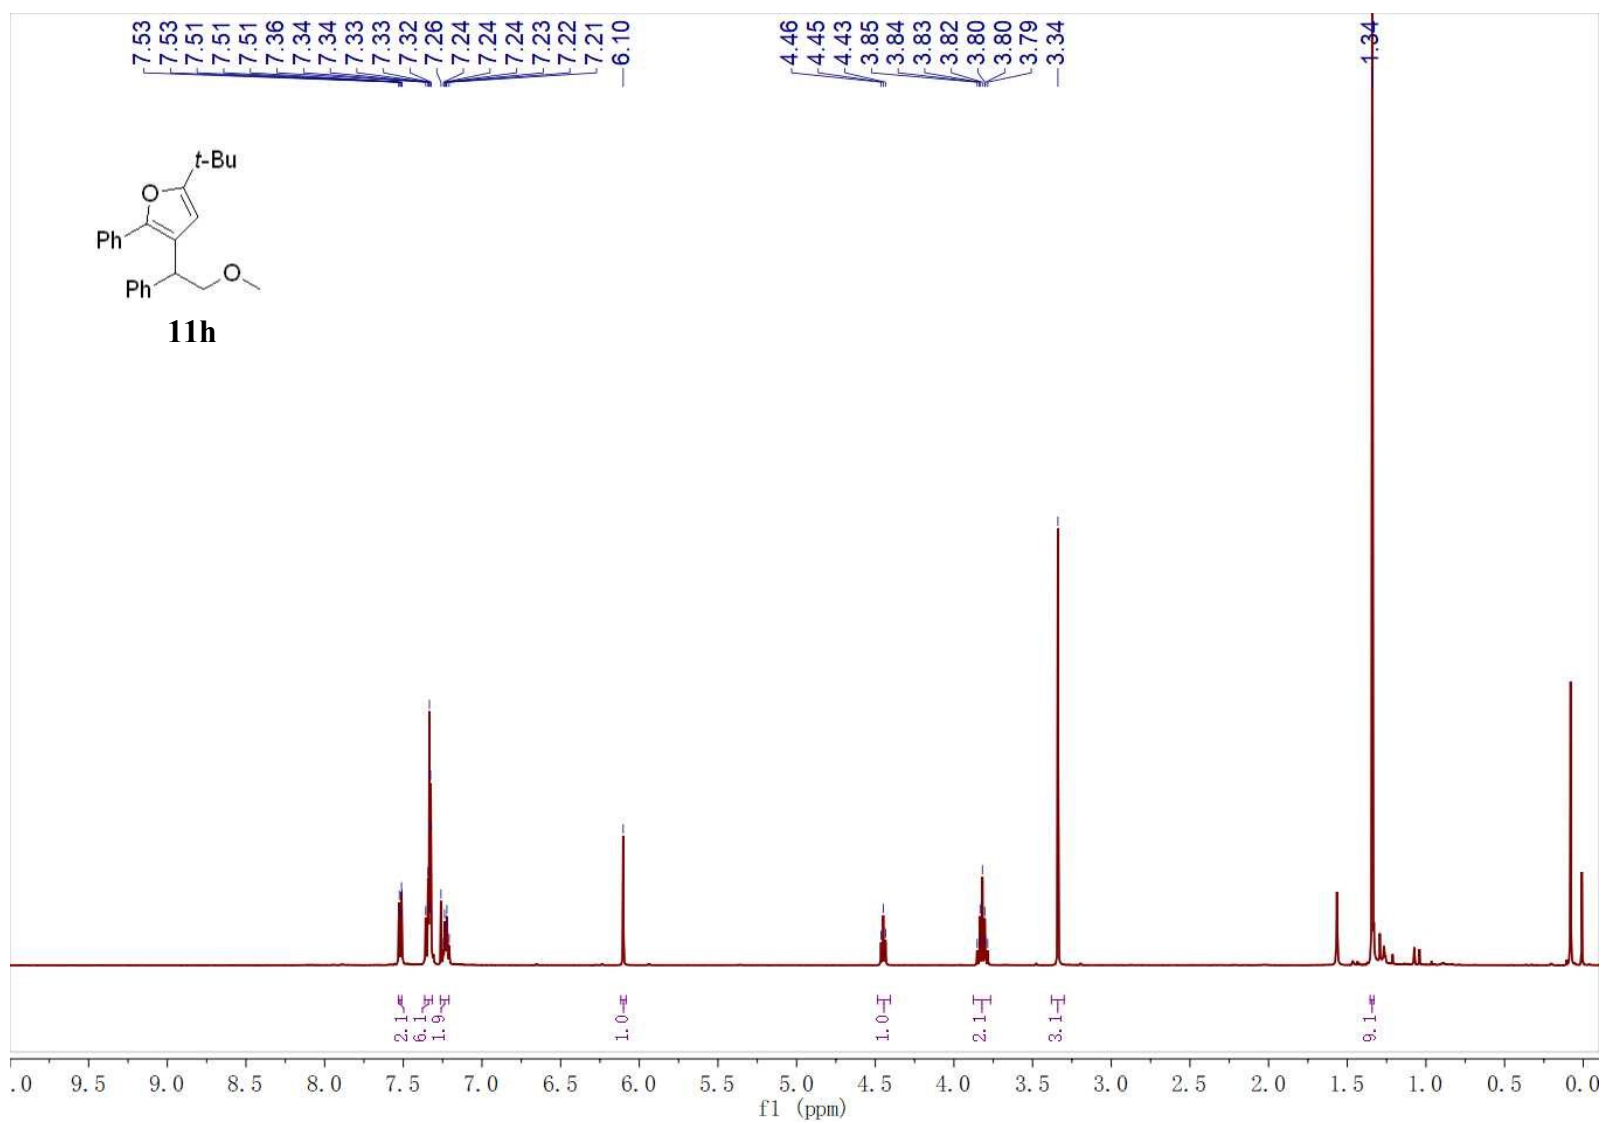

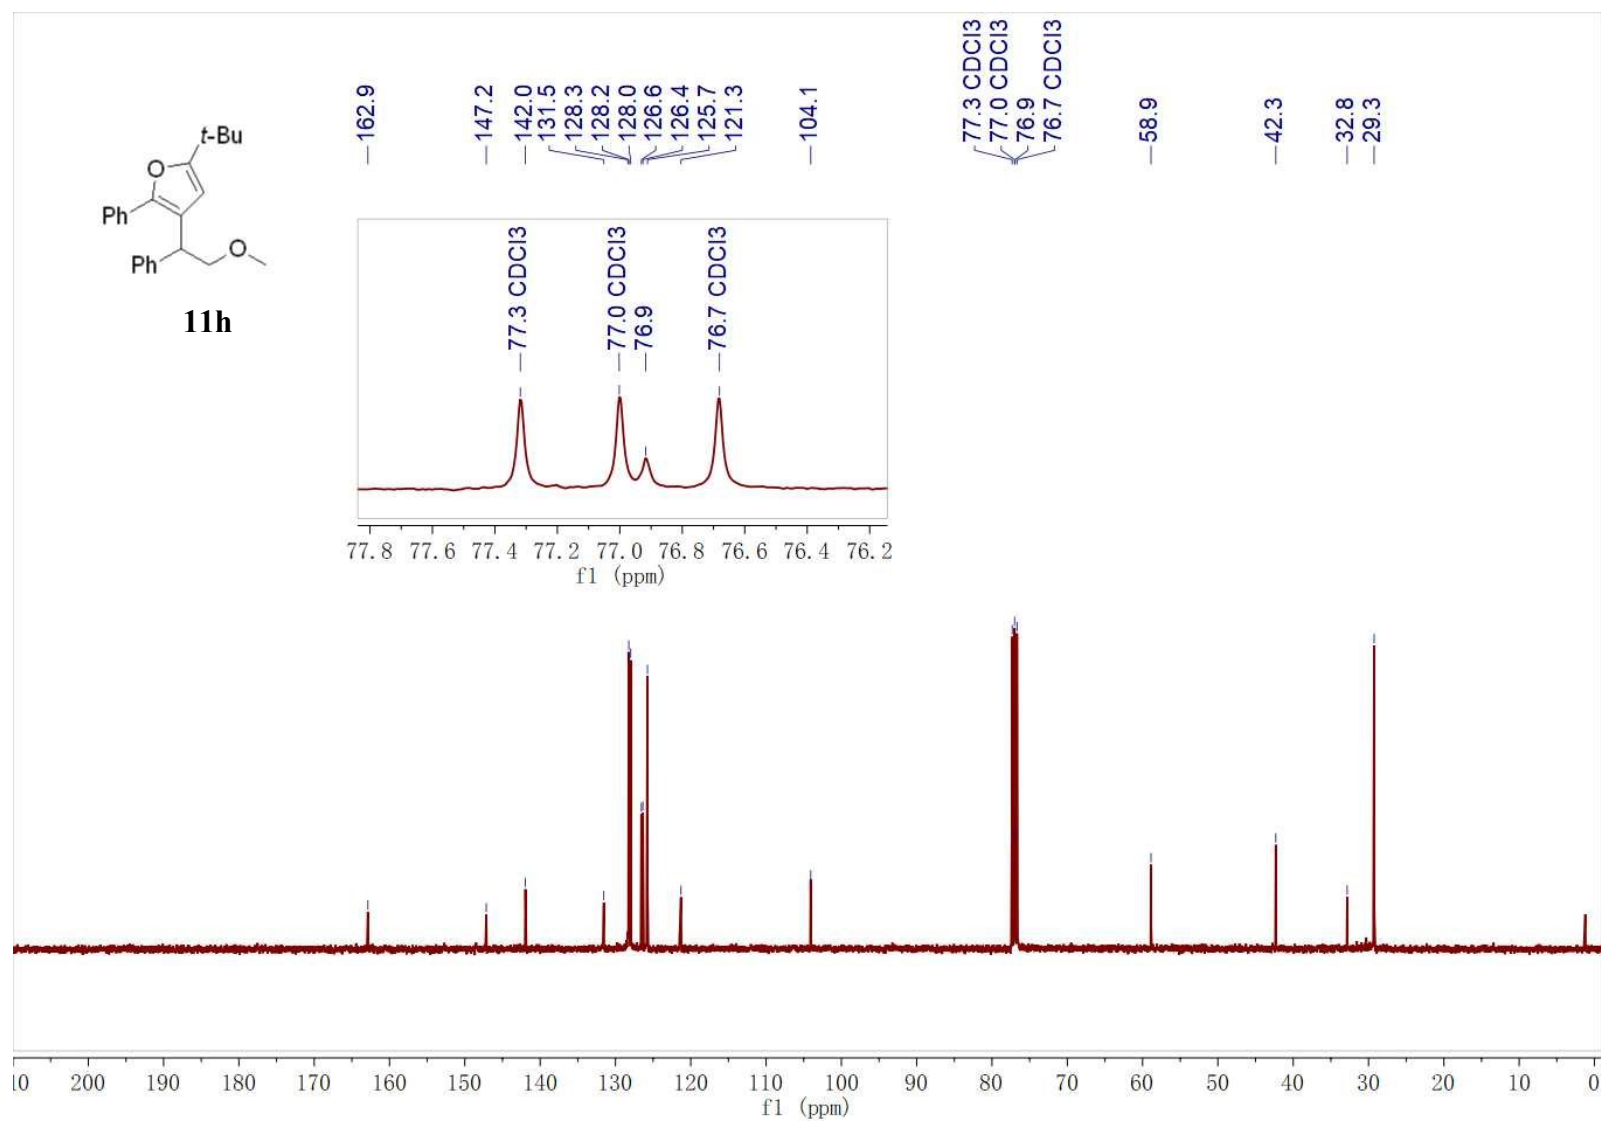

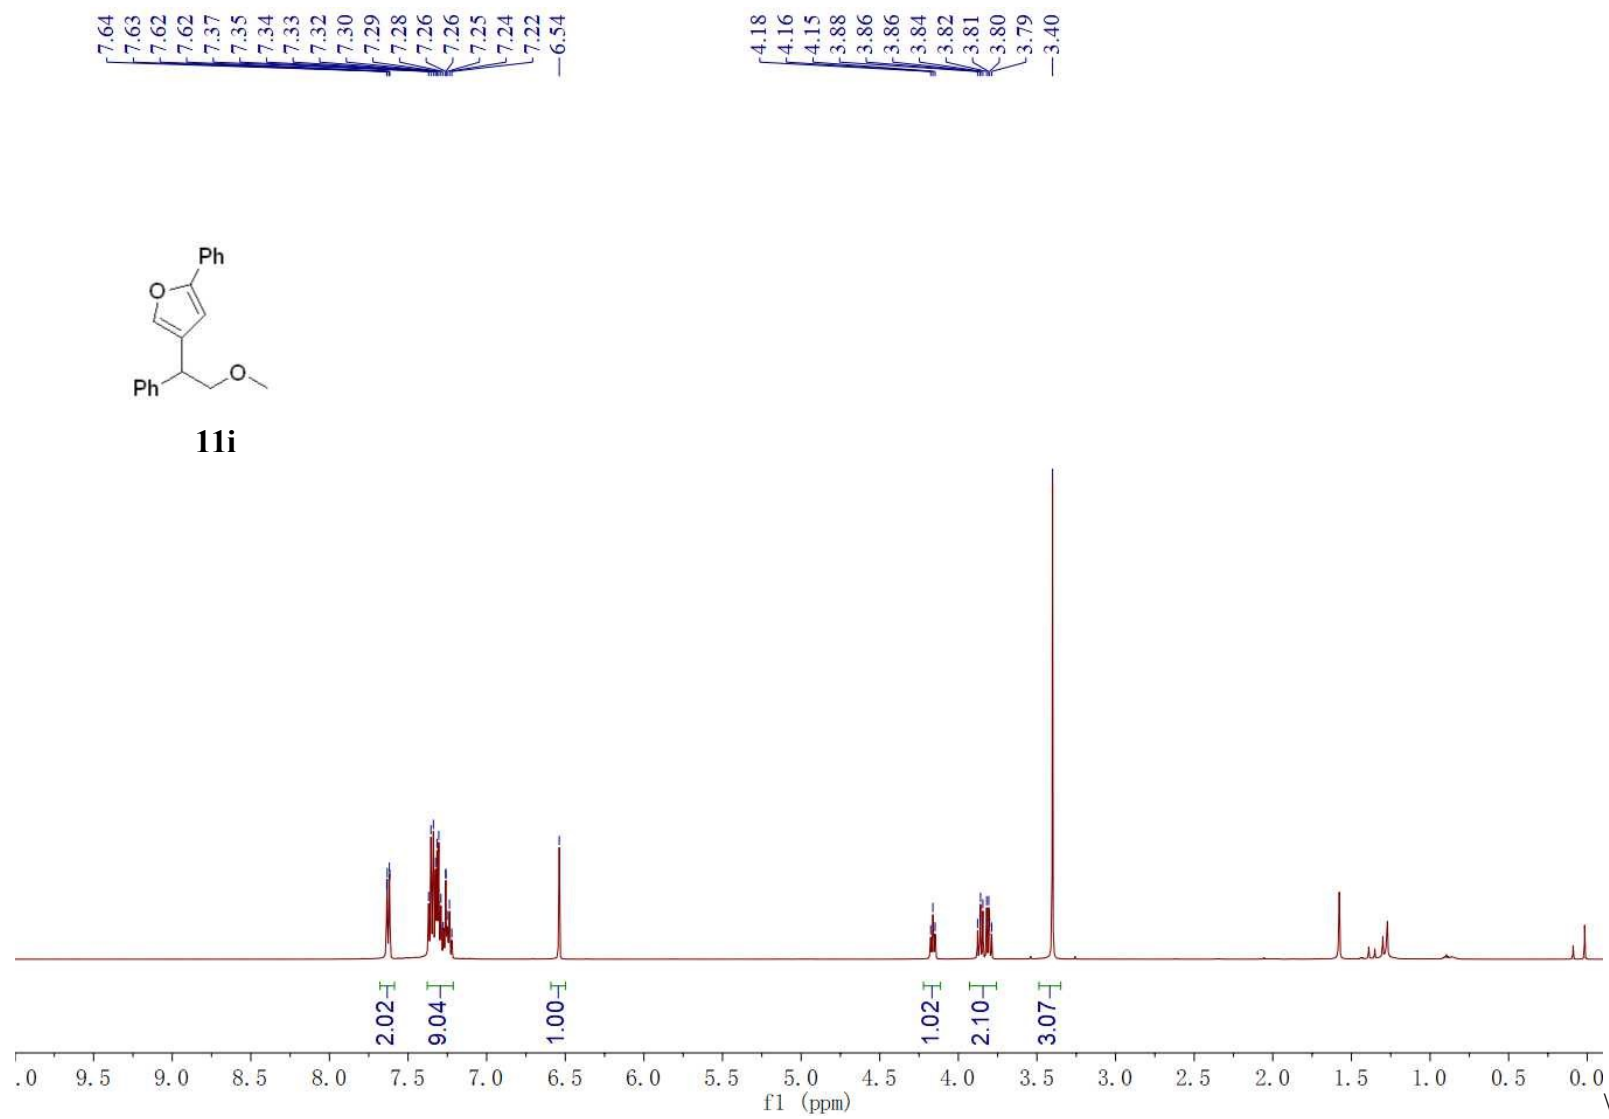

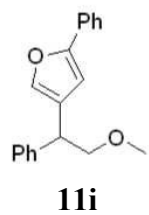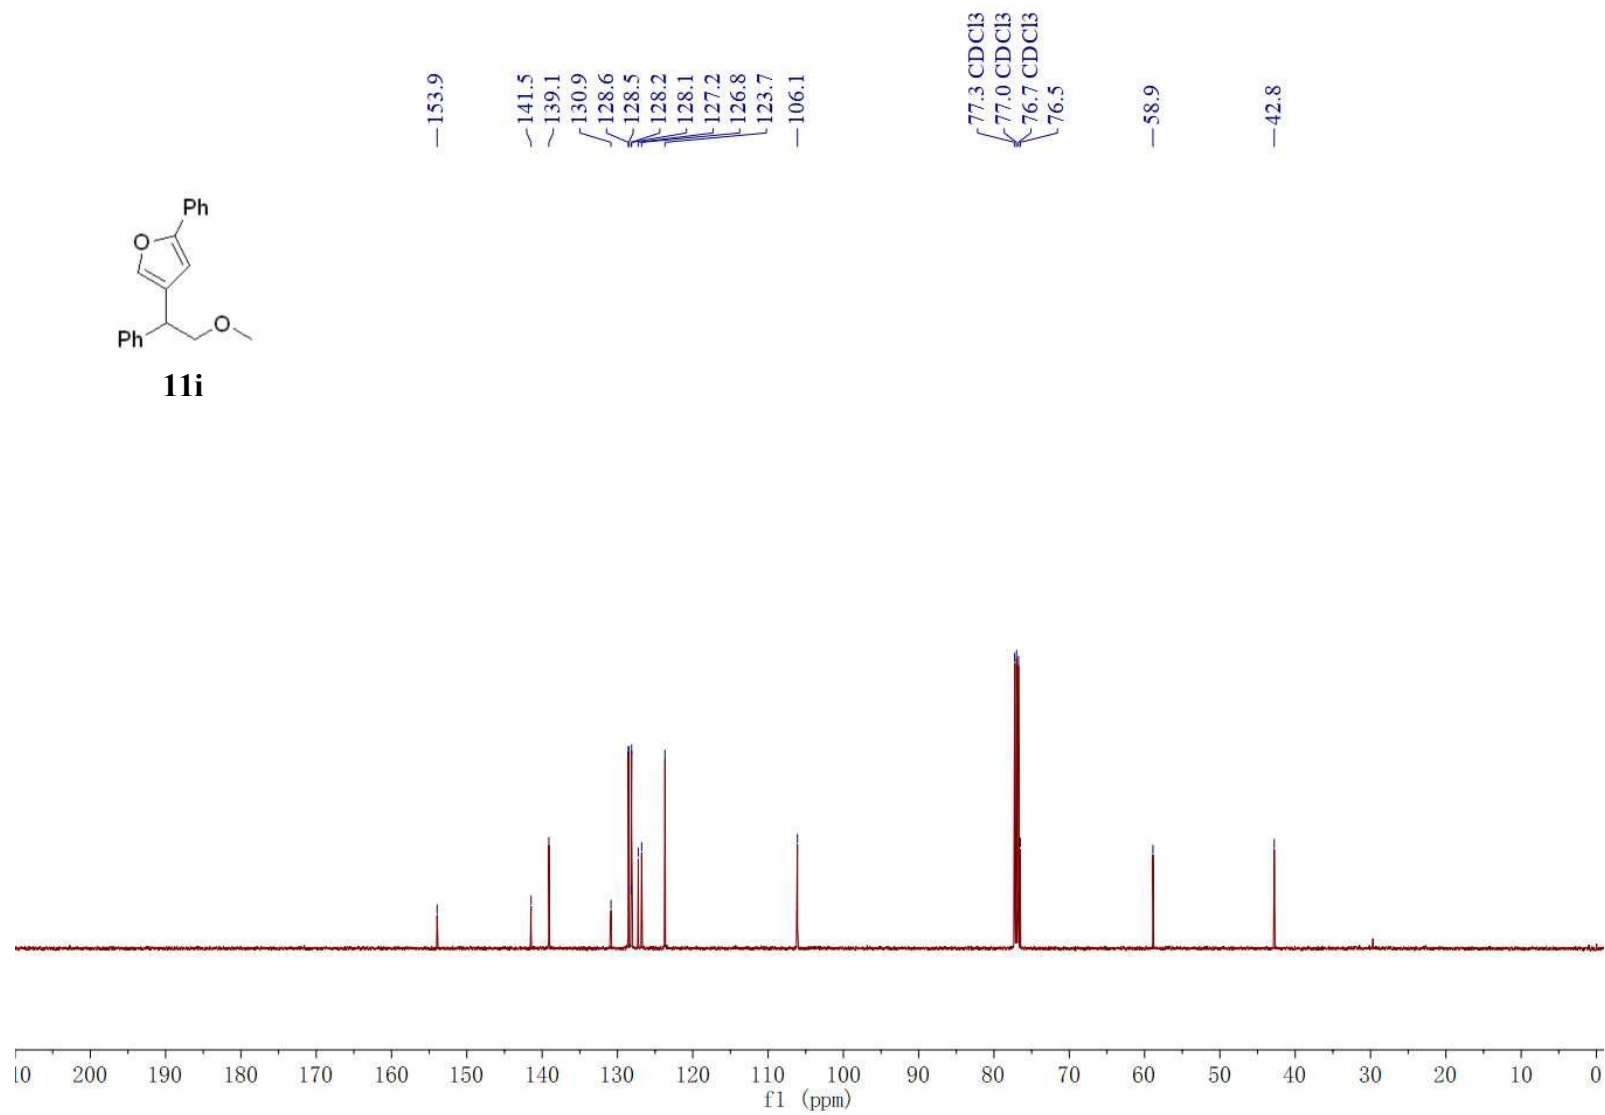

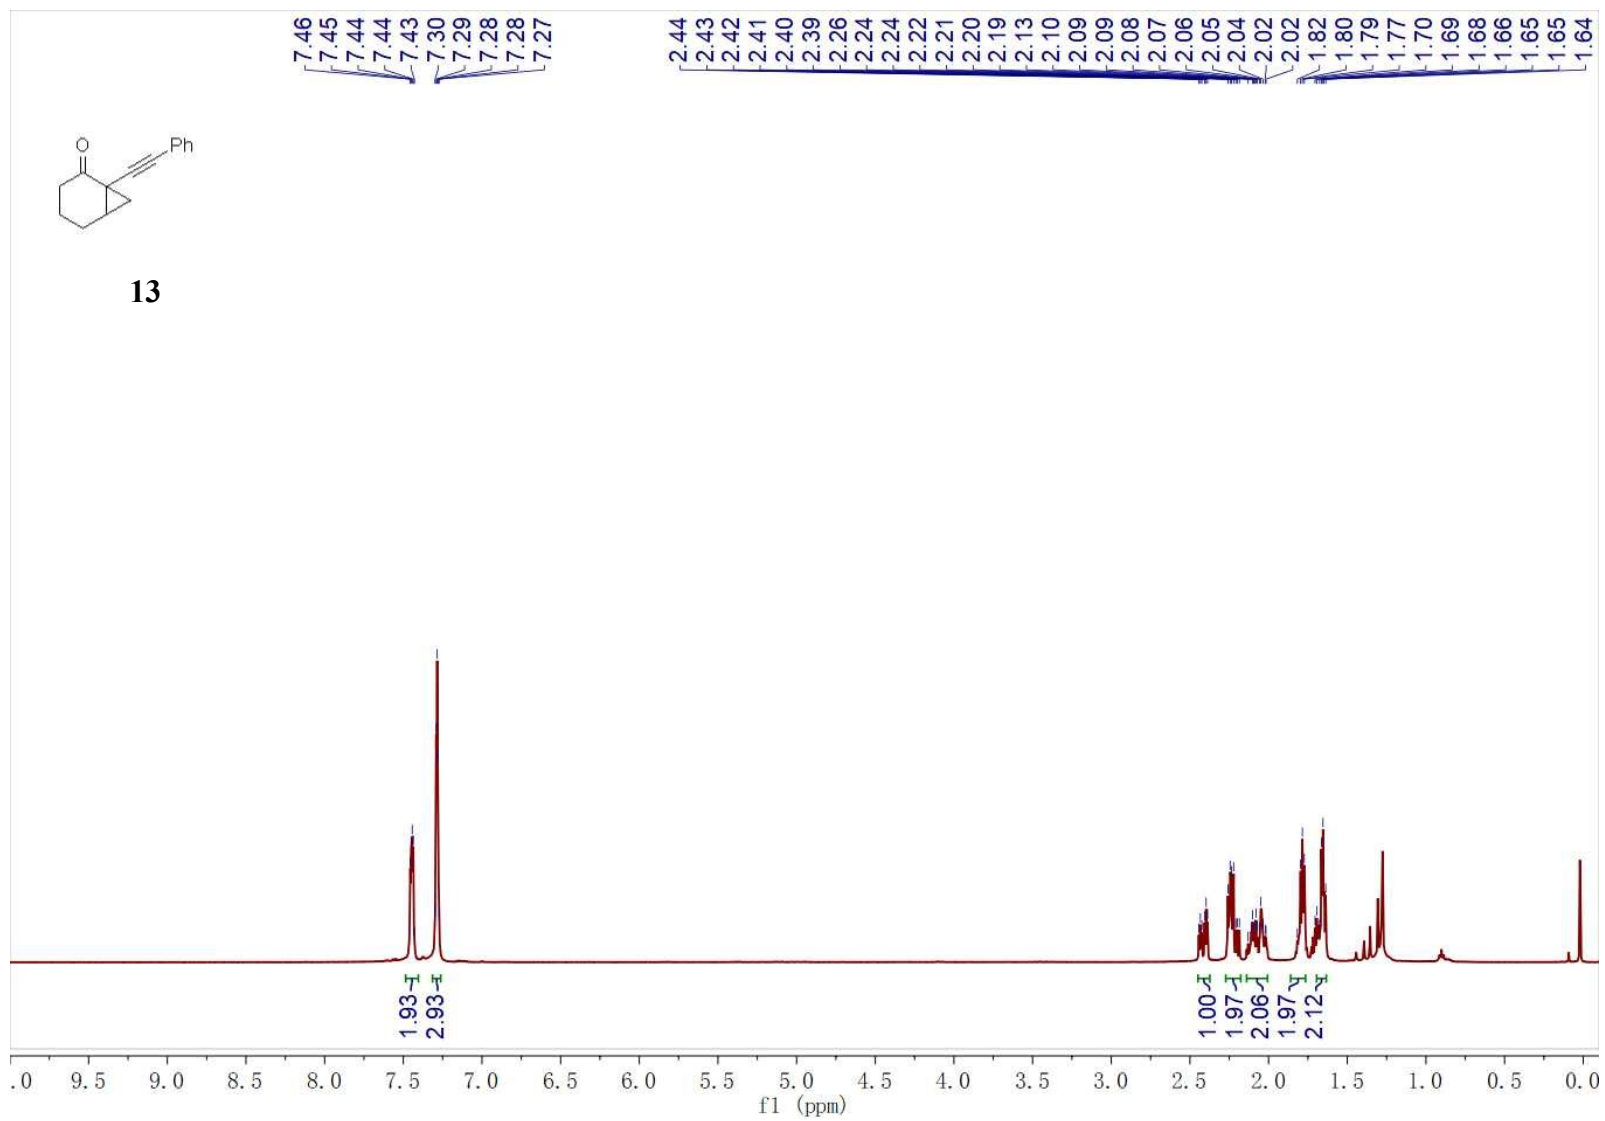



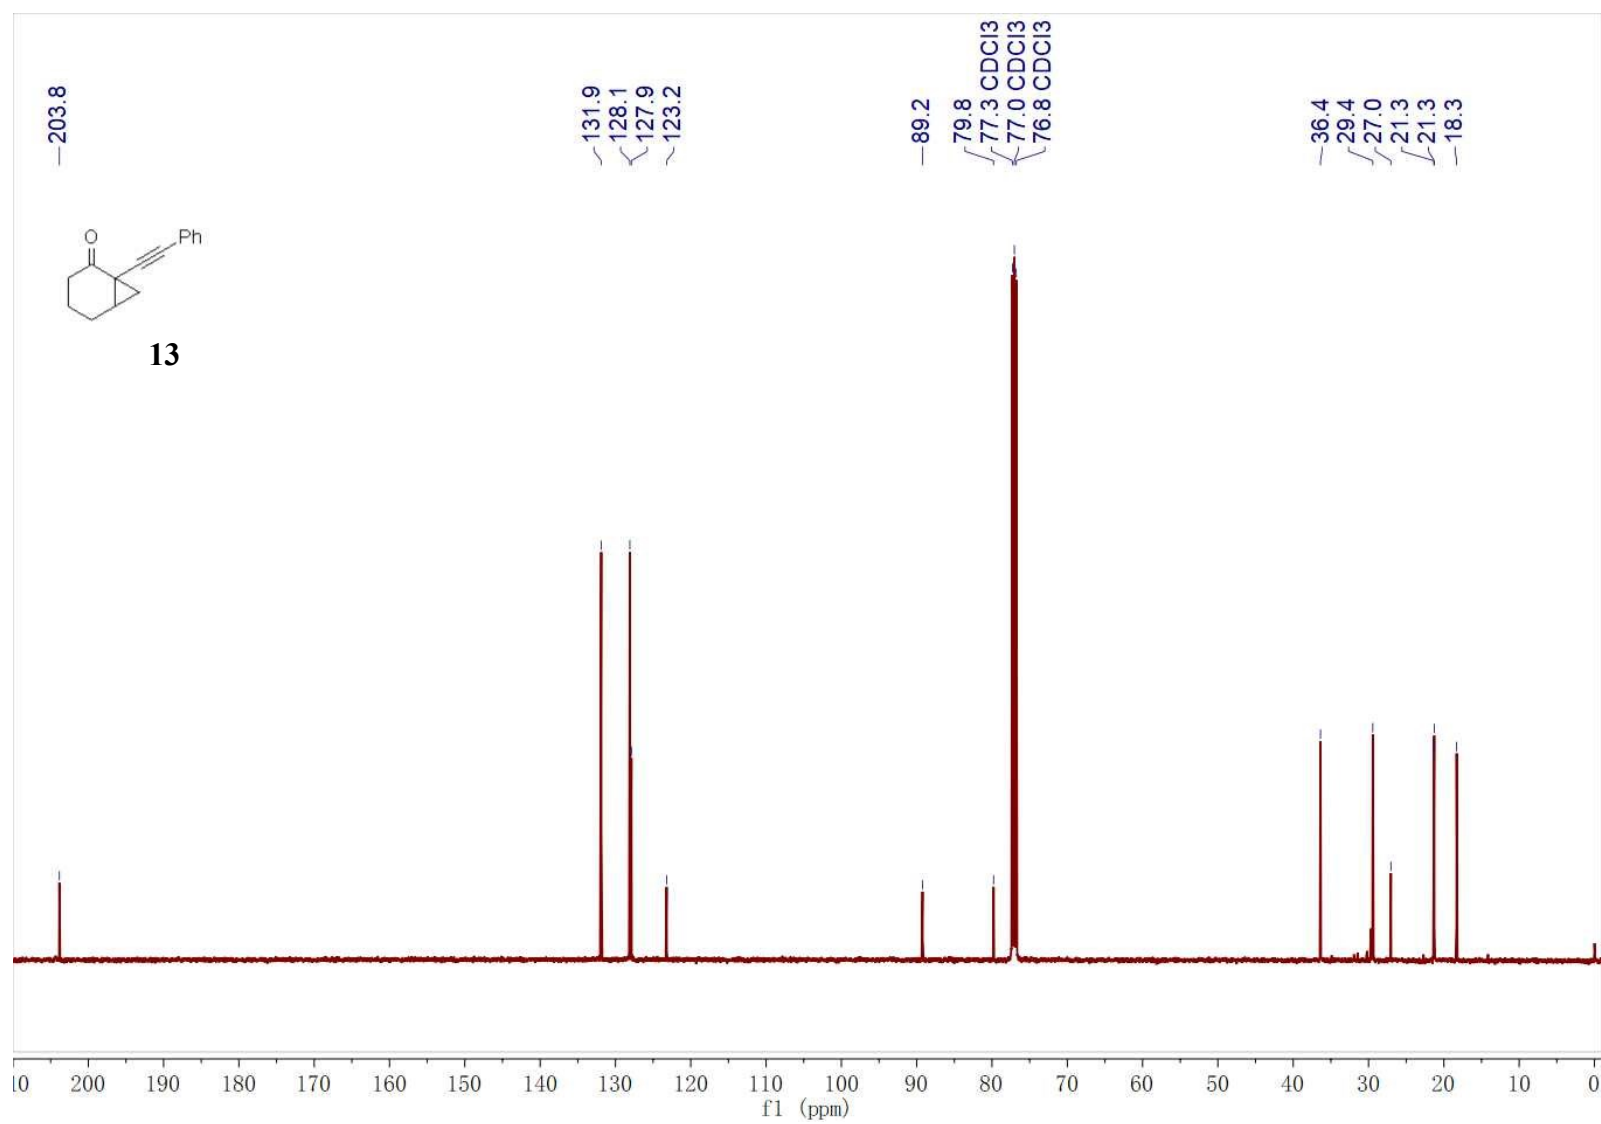

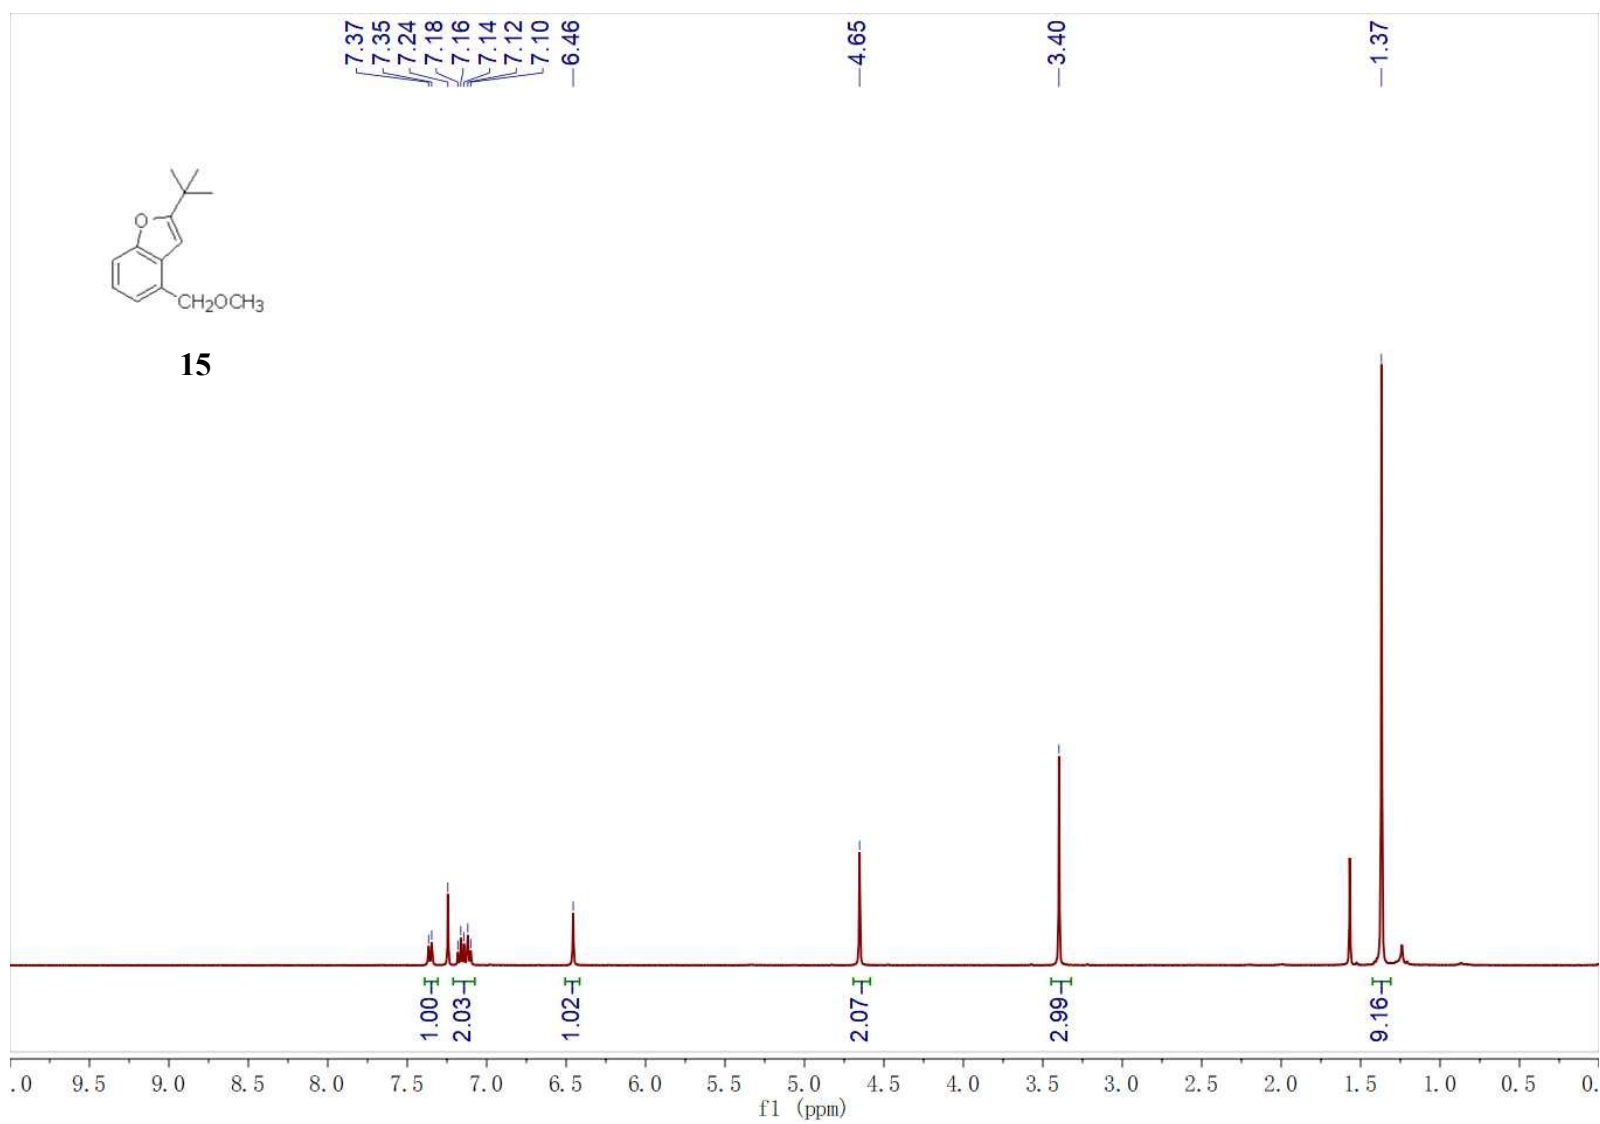

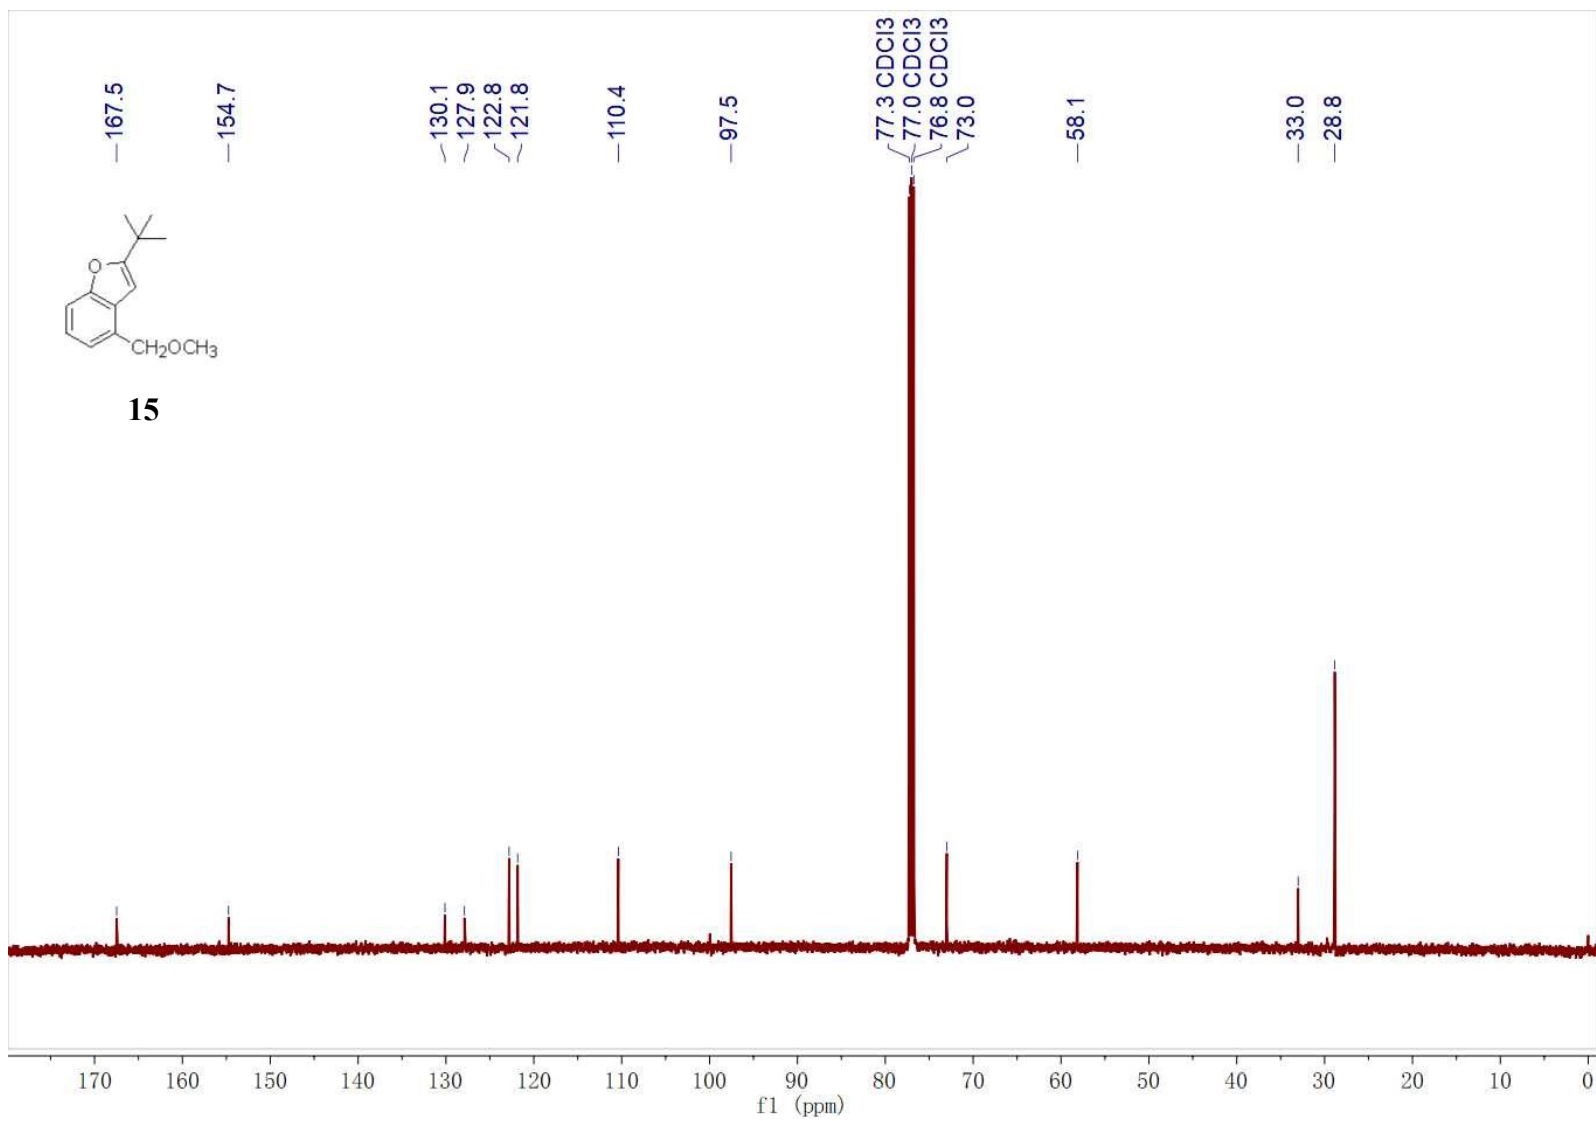

Supplement: d0qo01472a1.pdf [file d0qo01472a1.pdf]
